# Supplementary material for: Tet2 Inactivation Enhances the Antitumor Activity of Tumor-Infiltrating Lymphocytes
Source: Oxford University Press journal article supplement (doi:10.1158/0008-5472.can-20-3213), 2021-02-15
Supplement: 00085472can203213-sup-252239_2_supp_6901348_q62jj9.xlsx [file 00085472can203213-sup-252239_2_supp_6901348_q62jj9.xlsx]

## Sheet: D0_vs_D3
chrom	start	end	D0-WT-1	D0-WT-2	D3-WT-1	D3-WT-2	D0-TET2KO-1	D0-TET2KO-2	D3-TET2KO-1	D3-TET2KO-2	Log2FC(WT D0_vs_D3)	P-value(WT D0_vs_D3)	Log2FC(TET2KO D0_vs_D3)	P-value(TET2KO D0_vs_D3)	Nearby Gene	position in relation to nearby genes
chr1	4496282	4496848	28.095	28.3038	19.9349	10.8207	62.755	56.3643	24.7779	25.9136	-0.885979	0.261481	-1.23245	0.00814283	Sox17,Sox17,Sox17,Sox17,Sox17,Sox17,Sox17,Sox17,Sox17,Sox17	Intron,Promoter,Intron,Intron,Promoter,Exon,Exon,Exon,Promoter,Promoter
chr1	4600757	4601064	30.2562	43.3992	2.74965	5.66799	37.4657	38.9577	7.14747	7.48616	-3.09572	0.000179602	-2.38621	0.000194836	LOC108167609	Intron
chr1	4671428	4672062	25.9338	33.0211	10.3112	9.27489	107.714	78.7442	5.71798	18.4275	-1.58942	0.0454455	-2.95883	0.000543393	Intergenic	Intergenic
chr1	4748120	4748631	43.2231	49.0599	15.1231	14.4276	73.9947	88.6909	6.19447	14.3965	-1.6425	0.00879491	-3.00515	2.26971e-09	Intergenic	Intergenic
chr1	4768450	4768652	6.48346	5.66076	21.3098	30.9163	5.61985	5.80221	24.7779	13.8206	2.10307	0.0214394	1.76041	0.0553604	Intergenic	Intergenic
chr1	4785033	4786306	183.698	155.671	413.822	485.386	221.984	243.693	502.705	424.984	1.40334	2.91952e-11	0.994379	9.92235e-10	Mrpl15,Mrpl15,Mrpl15,Mrpl15,Mrpl15,Mrpl15,Intergenic	Intron,Intron,Promoter,Promoter,Exon,Exon,Intergenic
chr1	4807351	4808582	164.248	226.431	512.121	565.768	336.254	299.228	554.644	553.976	1.47131	1.48098e-12	0.804445	5.21262e-09	Intergenic,Lypla1,Lypla1,Lypla1	Intergenic,Promoter,Promoter,Promoter
chr1	4857332	4858848	335.699	322.663	771.963	968.195	501.103	507.279	723.324	721.551	1.40293	9.94582e-17	0.518767	5.5125e-06	Intergenic,Tcea1,Tcea1	Intergenic,Promoter,Promoter
chr1	5018792	5019006	18.0096	7.54768	14.4356	6.18326	29.0359	17.4066	6.67097	2.30343	-0.333623	0.779795	-2.34568	0.00777383	Rgs20,Rgs20,Rgs20,Rgs20,Rgs20	Intron,Intron,Intron,Promoter,Promoter
chr1	5082556	5083696	209.632	269.83	451.629	519.909	284.739	242.035	525.577	509.059	1.02439	7.60177e-07	0.976391	4.7201e-11	Intergenic,Atp6v1h,Atp6v1h	Intergenic,Promoter,Promoter
chr1	5084425	5084775	4.32231	5.66076	30.9335	31.4316	8.42977	2.48666	22.8719	30.5205	2.65523	0.00233778	2.3108	0.00687329	Atp6v1h	Promoter
chr1	6213865	6215782	386.847	354.741	880.574	985.199	615.373	541.263	953.949	902.37	1.33018	3.60488e-18	0.684532	3.23594e-10	4732440D04Rik,Rb1cc1,Rb1cc1,Rb1cc1,Rb1cc1,4732440D04Rik,4732440D04Rik	Exon,Promoter,Promoter,Promoter,Promoter,Intron,Promoter
chr1	6382813	6382982	12.9669	18.8692	4.12447	8.24435	44.0221	41.4443	10.483	11.5172	-1.34386	0.220936	-1.95947	0.000768965	LOC108167611	Promoter
chr1	6406110	6406901	69.8773	76.4203	147.793	158.188	99.284	97.8086	163.915	141.085	1.06743	0.00111636	0.631442	0.0242329	Intergenic	Intergenic
chr1	6453310	6454810	217.556	263.225	166.354	128.303	340.001	366.368	168.204	176.789	-0.707871	0.0106964	-1.03528	3.51237e-09	Intergenic	Intergenic
chr1	6461297	6461683	19.4504	48.1165	11.686	5.15272	78.6779	56.3643	8.10046	2.30343	-2.01613	0.0185559	-3.65906	1.20638e-09	Intergenic	Intergenic
chr1	6519098	6519499	46.825	47.173	0.687411	3.6069	49.642	43.931	1.90599	8.06202	-4.36855	3.39607e-07	-3.26803	2.40421e-06	St18	Promoter
chr1	7086071	7086635	8.64462	5.66076	55.6803	66.47	5.61985	6.63109	70.5217	60.4652	3.07523	2.08233e-06	3.41475	1.84474e-08	Intergenic	Intergenic
chr1	7087939	7090049	785.219	782.129	1887.63	2264.1	1079.01	1141.38	1821.65	1938.92	1.40611	5.46339e-28	0.759034	1.57681e-21	Intergenic,Pcmtd1,Pcmtd1,Pcmtd1	Intergenic,Promoter,Promoter,Promoter
chr1	7090257	7091050	28.095	16.0388	69.4285	72.6533	44.0221	29.011	57.6562	46.0687	1.67139	0.00169786	0.51274	0.312778	Pcmtd1	Promoter
chr1	7095851	7096189	40.3415	41.5123	2.74965	11.336	31.8458	24.8666	4.76498	14.3965	-2.50101	0.00162742	-1.58046	0.0393383	Pcmtd1	Promoter
chr1	7100575	7100894	11.5262	9.4346	30.2461	41.2217	8.42977	14.0911	31.4489	23.6102	1.76624	0.0186487	1.28424	0.078295	Pcmtd1	Promoter
chr1	7147072	7147322	15.1281	11.3215	10.9986	8.24435	28.0992	39.7866	6.67097	13.2447	-0.468617	0.670382	-1.78419	0.00890414	Intergenic	Intergenic
chr1	7179947	7180382	50.4269	54.7207	5.49929	6.18326	37.4657	14.0911	13.8184	10.9413	-3.16367	2.09612e-06	-1.04832	0.174826	Intergenic	Intergenic
chr1	7206112	7206562	24.4931	29.2473	18.5601	19.065	67.4382	58.8509	26.2074	23.6102	-0.510979	0.503106	-1.33916	0.00344076	Intergenic	Intergenic
chr1	7206669	7206892	26.6542	20.7561	9.62376	9.27489	34.6557	31.4977	14.7714	13.2447	-1.33118	0.125613	-1.23689	0.0482027	Intergenic	Intergenic
chr1	7395456	7395897	10.8058	7.54768	108.611	125.211	5.61985	15.7488	93.8701	108.837	3.65235	3.25141e-13	3.22167	8.75966e-11	Gm26901,Gm26901,Gm26901,Gm26901	Intron,Intron,Intron,Promoter
chr1	7397304	7398590	449.52	471.73	1226.34	1406.69	583.528	586.852	1180.29	1257.68	1.51676	1.87557e-27	1.05809	1.41251e-28	Gm26901,Gm26901,Gm26901,Gm26901,Gm26901,Gm26901,Gm26901	Intron,Intron,Promoter,Promoter,Promoter,Exon,Exon
chr1	7824040	7824310	5.76308	6.60422	14.4356	25.2483	0.936641	0.828886	30.0194	31.6722	1.69167	0.0975111	5.13116	7.86095e-05	Intergenic	Intergenic
chr1	9541308	9541621	29.5358	24.53	62.5544	68.5311	54.3252	62.9954	47.6498	44.917	1.27373	0.0139676	-0.342606	0.452228	Intergenic	Intergenic
chr1	9544787	9545571	230.523	283.982	734.843	983.138	427.108	426.877	867.703	810.809	1.74463	4.6673e-20	0.975506	3.70026e-18	Intergenic,Rrs1	Intergenic,Promoter
chr1	9547886	9548993	48.2658	41.5123	112.735	139.123	51.5153	55.5354	86.2461	84.0754	1.48606	9.5442e-05	0.669249	0.0786572	Adhfe1,Adhfe1,Adhfe1,Adhfe1,Intergenic	Promoter,Promoter,Promoter,Promoter,Intergenic
chr1	9696945	9697098	4.32231	7.54768	21.9972	15.9734	5.61985	4.14443	15.7244	20.7309	1.69158	0.1043	1.90437	0.0439604	Mybl1,Mybl1,Mybl1	Intron,Intron,Intron
chr1	9699534	9701367	480.497	482.108	1024.93	1244.9	740.883	852.095	982.062	940.953	1.23876	1.47992e-16	0.270598	0.0130711	Mybl1,Mybl1,Mybl1,Mybl1,Mybl1,Mybl1,Mybl1,Mybl1,Mybl1,Intergenic	Intron,Intron,Intron,Promoter,Promoter,Promoter,Exon,Exon,Exon,Intergenic
chr1	9702478	9703400	69.1569	56.6076	30.2461	38.6454	137.686	119.36	34.7843	50.0997	-0.866538	0.0927291	-1.60354	2.56602e-06	Intergenic	Intergenic
chr1	9747242	9748928	365.235	383.988	1101.92	1421.63	603.197	656.478	1162.18	1145.96	1.75405	3.24658e-28	0.872655	1.15977e-19	Vcpip1,1700034P13Rik,Vcpip1	Exon,Promoter,Promoter
chr1	9772830	9773641	31.6969	26.4169	113.423	123.15	44.0221	58.8509	93.8701	93.865	2.01987	6.35699e-07	0.864142	0.0215368	Intergenic	Intergenic
chr1	9797214	9799623	69.8773	116.046	261.904	221.052	99.284	144.226	165.821	214.219	1.38629	6.48214e-06	0.636718	0.0234246	Intergenic,Sgk3	Intergenic,Promoter
chr1	9805857	9806252	2.88154	13.2084	52.2433	41.737	3.74657	10.7755	46.6968	34.5515	2.59248	0.000817523	2.46573	0.000482662	Sgk3	Promoter
chr1	9810759	9810882	0	1.88692	11.686	11.8512	0.936641	4.97332	18.5834	11.5172	3.76314	0.0325932	2.32329	0.0425927	Sgk3	Promoter
chr1	9815848	9816195	12.2465	1.88692	47.4314	43.7981	12.1763	4.14443	27.1604	27.6412	2.63706	0.000964784	1.76452	0.0255472	Sgk3	Promoter
chr1	9833454	9833758	30.2562	17.9257	6.87411	8.75962	47.7687	42.2732	4.76498	3.45515	-1.62403	0.0717536	-3.4411	2.42781e-07	Sgk3	Promoter
chr1	9876034	9876246	6.48346	0.94346	26.1216	13.9123	7.49313	5.80221	13.3419	5.75859	2.37369	0.0429975	0.533647	0.651337	Intergenic	Intergenic
chr1	9876575	9877641	30.9765	24.53	222.034	184.467	39.3389	24.0377	194.411	170.454	2.86103	1.29202e-16	2.53616	9.91878e-15	Intergenic	Intergenic
chr1	9882890	9883741	79.9627	51.8903	24.7468	24.2178	118.017	140.082	46.6968	27.0654	-1.43475	0.00699278	-1.79922	7.35703e-07	Intergenic	Intergenic
chr1	9892507	9893496	12.2465	12.265	142.982	130.879	7.49313	11.6044	101.018	118.627	3.48128	6.58431e-15	3.51074	2.70017e-13	Intergenic	Intergenic
chr1	9906912	9907406	18.0096	2.83038	61.1796	64.4089	7.49313	5.80221	64.3272	59.3134	2.57229	0.0357777	3.22462	9.5555e-08	Mcmdc2,Mcmdc2,Mcmdc2,Mcmdc2,Mcmdc2,Mcmdc2	Promoter,Promoter,Promoter,Promoter,Promoter,Promoter
chr1	9943620	9944669	152.722	146.236	396.636	494.661	255.703	285.137	361.662	382.946	1.5766	2.84233e-13	0.459397	0.00629391	Snhg6,Snhg6,Snhg6,Intergenic	Intron,Promoter,Exon,Intergenic
chr1	9944904	9945518	6.48346	2.83038	94.1754	78.8365	10.3031	2.48666	69.5687	69.103	4.16479	8.96604e-11	3.47213	2.28868e-08	Snhg6,Intergenic	Promoter,Intergenic
chr1	9982978	9983488	10.8058	8.49114	72.8656	103.57	16.8595	11.6044	50.5088	68.5272	3.18369	7.43701e-09	2.06923	0.00012722	Ppp1r42,Ppp1r42,Ppp1r42,Ppp1r42	Intron,Intron,Intron,Intron
chr1	10037136	10038543	171.452	185.862	556.803	534.852	227.604	271.046	478.404	481.994	1.61303	7.57723e-18	0.94316	9.86922e-10	Cops5,Cspp1,Cspp1,Cspp1,Cops5,Cspp1,Cops5	Intron,Promoter,Promoter,Promoter,Promoter,Promoter,Exon
chr1	10038954	10040556	286.713	316.059	624.17	697.162	459.891	383.774	631.836	529.214	1.1351	3.66614e-11	0.463805	0.00195525	Cspp1,Cspp1,Cspp1,Cops5,Cspp1,Cspp1,Cspp1,Cspp1,Cspp1	Promoter,Promoter,Promoter,Promoter,Promoter,Promoter,Promoter,Promoter,Promoter
chr1	10165060	10165508	56.9104	46.2296	5.49929	7.2138	44.0221	53.0487	12.3889	12.093	-3.01075	6.70483e-06	-1.98816	0.000301157	Arfgef1	Intron
chr1	10220181	10220466	10.0854	11.3215	37.1202	39.1606	25.2893	31.4977	24.7779	27.6412	1.83766	0.0106713	-0.11902	0.858958	Arfgef1	Intron
chr1	10231571	10233814	294.637	293.416	620.732	600.291	372.783	411.128	542.731	608.683	1.05369	5.22566e-10	0.552449	5.73066e-05	Arfgef1,Arfgef1,Arfgef1,Intergenic	Intron,Promoter,Exon,Intergenic
chr1	10280157	10280753	7.92423	12.265	94.1754	86.5656	15.9229	5.80221	70.9982	80.0444	3.18334	2.73635e-09	2.81803	2.0726e-07	Intergenic	Intergenic
chr1	10794206	10794358	1.44077	2.83038	17.8727	15.4581	0	1.65777	8.10046	7.48616	2.99523	0.019093	3.17807	0.069383	Intergenic	Intergenic
chr1	10880201	10880688	99.4131	73.5899	14.4356	13.9123	59.945	81.2309	19.5364	22.4585	-2.61402	1.32345e-07	-1.75399	0.000121421	Intergenic	Intergenic
chr1	12841406	12841969	33.1377	28.3038	9.62376	5.66799	62.755	88.6909	8.57696	1.15172	-2.02394	0.013075	-3.94427	0.00181358	Intergenic	Intergenic
chr1	13012650	13012946	5.04269	1.88692	35.058	27.8247	4.68321	0	38.5963	31.0964	3.13553	0.000882161	3.91958	0.0316369	Intergenic	Intergenic
chr1	13052081	13052672	20.1708	29.2473	70.116	45.3439	26.226	27.3533	44.7908	48.3721	1.22909	0.0345843	0.79682	0.124974	Intergenic	Intergenic
chr1	13134374	13134629	7.92423	21.6996	5.49929	6.69853	23.416	32.3266	3.33549	5.75859	-1.26399	0.274521	-2.63277	0.000848431	Intergenic	Intergenic
chr1	13155320	13156001	105.897	84.9114	26.1216	32.4621	164.849	193.131	50.9853	42.0377	-1.70065	0.00010635	-1.94144	1.09864e-11	Ncoa2,Ncoa2,Ncoa2,Ncoa2,Ncoa2,Ncoa2,Ncoa2,Ncoa2,Ncoa2,Ncoa2	Intron,Intron,Intron,Intron,Intron,Intron,Intron,Intron,Intron,Intron
chr1	13188508	13188747	5.04269	16.0388	26.809	38.6454	5.61985	11.6044	21.4424	16.6999	1.66625	0.0479045	1.13871	0.190688	Ncoa2,Ncoa2,Ncoa2,Ncoa2,Ncoa2,Ncoa2,Ncoa2,Ncoa2,Ncoa2,Ncoa2	Intron,Intron,Intron,Intron,Intron,Intron,Intron,Intron,Intron,Intron
chr1	13219997	13220218	15.1281	12.265	0.687411	2.57636	24.3527	19.8933	5.24148	1.15172	-3.02198	0.0289951	-2.75522	0.00331408	Ncoa2,Ncoa2,Ncoa2,Ncoa2,Ncoa2,Ncoa2,Ncoa2,Ncoa2,Ncoa2,Ncoa2	Intron,Intron,Intron,Intron,Intron,Intron,Intron,Intron,Intron,Intron
chr1	13231295	13231812	42.5027	56.6076	23.372	27.3094	96.4741	87.862	29.5429	31.0964	-0.960533	0.100608	-1.60426	3.10805e-05	Ncoa2,Ncoa2,Ncoa2,Ncoa2,Ncoa2,Ncoa2,Ncoa2,Ncoa2,Ncoa2,Ncoa2	Intron,Intron,Intron,Intron,Intron,Intron,Intron,Intron,Intron,Intron
chr1	13254204	13254689	38.9008	42.4557	6.1867	6.18326	79.6145	63.8243	10.9595	13.8206	-2.71644	0.000198024	-2.53772	1.29376e-07	Ncoa2,Ncoa2,Ncoa2,Ncoa2,Ncoa2,Ncoa2,Ncoa2,Ncoa2,Ncoa2,Ncoa2	Intron,Intron,Intron,Intron,Intron,Intron,Intron,Intron,Intron,Intron
chr1	13259592	13259878	8.64462	29.2473	8.24894	5.15272	34.6557	26.5244	5.24148	4.03101	-1.49733	0.166871	-2.71265	0.000296698	Ncoa2,Ncoa2,Ncoa2,Ncoa2,Ncoa2,Ncoa2,Ncoa2,Ncoa2,Ncoa2,Ncoa2	Intron,Intron,Intron,Intron,Intron,Intron,Intron,Intron,Intron,Intron
chr1	13267199	13267727	52.5881	36.795	31.6209	43.7981	103.967	83.7175	40.9788	35.7032	-0.245864	0.68766	-1.28755	0.000706837	Ncoa2,Ncoa2,Ncoa2,Ncoa2,Ncoa2,Ncoa2,Ncoa2,Ncoa2,Ncoa2,Ncoa2	Intron,Intron,Intron,Intron,Intron,Intron,Intron,Intron,Intron,Intron
chr1	13276920	13277061	2.88154	6.60422	2.74965	1.54581	26.226	12.4333	5.71798	1.72758	-1.1443	0.560753	-2.34732	0.0168678	Ncoa2,Ncoa2,Ncoa2,Ncoa2,Ncoa2,Ncoa2,Ncoa2,Ncoa2,Ncoa2,Ncoa2	Intron,Intron,Intron,Intron,Intron,Intron,Intron,Intron,Intron,Intron
chr1	13289160	13289402	11.5262	12.265	2.06223	6.69853	34.6557	24.8666	4.28848	6.33444	-1.41616	0.275741	-2.49418	0.000878654	Ncoa2,Ncoa2,Ncoa2,Ncoa2,Ncoa2,Ncoa2,Ncoa2,Ncoa2,Ncoa2,Ncoa2	Intron,Intron,Intron,Intron,Intron,Intron,Intron,Intron,Intron,Intron
chr1	13293159	13293853	32.4173	41.5123	85.239	75.2296	59.945	60.5087	67.1862	70.2548	1.12289	0.0158107	0.189779	0.656841	Ncoa2,Ncoa2,Ncoa2,Ncoa2,Ncoa2,Ncoa2,Ncoa2,Ncoa2,Ncoa2,Ncoa2	Intron,Intron,Intron,Intron,Intron,Intron,Intron,Intron,Intron,Intron
chr1	13294731	13295331	46.825	26.4169	15.1231	16.4887	110.524	82.8886	35.2608	39.1584	-1.21747	0.0877858	-1.37753	0.000297963	Ncoa2,Ncoa2,Ncoa2,Ncoa2,Ncoa2,Ncoa2,Ncoa2,Ncoa2,Ncoa2,Ncoa2	Intron,Intron,Intron,Intron,Intron,Intron,Intron,Intron,Intron,Intron
chr1	13301117	13302786	176.494	208.505	112.735	114.906	445.841	406.154	142.949	124.385	-0.755517	0.00912933	-1.6689	4.8197e-22	Ncoa2,Ncoa2,Ncoa2,Ncoa2,Ncoa2,Ncoa2,Ncoa2,Ncoa2,Ncoa2,Ncoa2	Intron,Intron,Intron,Intron,Intron,Intron,Intron,Intron,Intron,Intron
chr1	13304981	13305183	20.8912	26.4169	4.12447	1.54581	23.416	16.5777	4.76498	3.45515	-3.09904	0.00294118	-2.27201	0.0109759	Ncoa2,Ncoa2,Ncoa2,Ncoa2,Ncoa2,Ncoa2,Ncoa2,Ncoa2,Ncoa2,Ncoa2	Intron,Intron,Intron,Intron,Intron,Intron,Intron,Intron,Intron,Intron
chr1	13306116	13306497	20.1708	15.0954	1.37482	5.15272	63.6916	60.5087	6.67097	3.45515	-2.39883	0.0398732	-3.59314	8.32304e-10	Ncoa2,Ncoa2,Ncoa2,Ncoa2,Ncoa2,Ncoa2,Ncoa2,Ncoa2,Ncoa2,Ncoa2	Intron,Intron,Intron,Intron,Intron,Intron,Intron,Intron,Intron,Intron
chr1	13306904	13307467	36.0192	47.173	5.49929	7.2138	139.56	122.675	3.81198	11.5172	-2.69669	0.000218784	-4.13489	2.43198e-19	Ncoa2,Ncoa2,Ncoa2,Ncoa2,Ncoa2,Ncoa2,Ncoa2,Ncoa2,Ncoa2,Ncoa2	Intron,Intron,Intron,Intron,Intron,Intron,Intron,Intron,Intron,Intron
chr1	13310644	13310775	2.16115	1.88692	2.06223	1.54581	15.9229	19.0644	2.38249	1.72758	-0.173629	0.949231	-3.08021	0.00282426	Ncoa2,Ncoa2,Ncoa2,Ncoa2,Ncoa2,Ncoa2,Ncoa2,Ncoa2,Ncoa2,Ncoa2,Ncoa2,Ncoa2	Intron,Intron,Intron,Intron,Intron,Intron,Intron,Intron,Intron,Intron,Promoter,Exon
chr1	13311914	13312167	18.73	16.9823	8.24894	9.79016	34.6557	25.6955	6.67097	6.33444	-0.983137	0.312264	-2.21082	0.00206517	Ncoa2,Ncoa2,Ncoa2,Ncoa2,Ncoa2,Ncoa2,Ncoa2,Ncoa2,Ncoa2	Intron,Intron,Intron,Intron,Intron,Intron,Intron,Intron,Intron
chr1	13312526	13312870	31.6969	38.6819	2.74965	5.15272	32.7824	50.5621	7.14747	5.18273	-3.12556	0.000188493	-2.75078	2.69547e-05	Ncoa2,Ncoa2,Ncoa2,Ncoa2,Ncoa2,Ncoa2,Ncoa2,Ncoa2,Ncoa2	Intron,Intron,Intron,Intron,Intron,Intron,Intron,Intron,Intron
chr1	13316399	13316827	23.7727	35.8515	7.56153	7.2138	43.0855	38.1288	4.28848	0.575859	-2.00925	0.0148502	-4.00175	5.32621e-07	Ncoa2,Ncoa2,Ncoa2,Ncoa2,Ncoa2,Ncoa2,Ncoa2,Ncoa2,Ncoa2	Intron,Intron,Intron,Intron,Intron,Intron,Intron,Intron,Intron
chr1	13382343	13382953	21.6115	11.3215	46.744	55.6493	40.2756	30.6688	71.4747	62.7686	1.62039	0.0105681	0.924766	0.0383683	Intergenic	Intergenic
chr1	13383318	13384068	29.5358	10.3781	123.734	123.665	60.8817	38.9577	127.225	146.268	2.59883	4.39123e-08	1.45928	1.7708e-05	Intergenic	Intergenic
chr1	13424662	13424844	2.88154	3.77384	19.2475	19.5803	0.936641	1.65777	13.8184	16.124	2.55629	0.0214096	3.51104	0.00783294	Intergenic	Intergenic
chr1	13426289	13427565	62.6735	62.2684	127.171	192.196	97.4107	135.108	131.513	128.416	1.35726	0.000134461	0.157789	0.625867	Intergenic	Intergenic
chr1	13454289	13454895	28.8154	22.6431	50.181	66.47	38.4023	37.2999	64.3272	48.948	1.1776	0.0345952	0.584183	0.219147	Intergenic	Intergenic
chr1	13465020	13465372	15.8485	18.8692	9.62376	7.72907	44.0221	56.3643	9.52996	1.72758	-1.00258	0.311571	-3.1209	5.28196e-06	Intergenic	Intergenic
chr1	13496264	13496400	4.32231	5.66076	4.12447	2.06109	16.8595	9.11775	2.85899	1.72758	-0.699375	0.703467	-2.48394	0.0297429	Intergenic	Intergenic
chr1	13513806	13514231	30.9765	44.3426	98.2998	138.093	62.755	90.3486	114.36	67.3755	1.66263	7.10786e-05	0.248017	0.565017	Intergenic	Intergenic
chr1	13521621	13522007	20.8912	16.0388	24.0594	27.8247	79.6145	58.8509	22.3954	38.5825	0.486868	0.534744	-1.18836	0.0117835	Intergenic	Intergenic
chr1	13530832	13530920	18.73	12.265	1.37482	4.12217	12.1763	12.4333	0.476498	2.87929	-2.46544	0.0466796	-2.91931	0.01988	Intergenic	Intergenic
chr1	13559422	13560180	39.6212	39.6253	39.1824	49.4661	147.053	98.6375	46.2203	51.2514	0.164949	0.782843	-1.33262	0.000129949	Intergenic	Intergenic
chr1	13572475	13572905	13.6873	8.49114	0	5.66799	73.058	61.3376	12.3889	11.5172	-1.92712	0.224405	-2.48794	3.60977e-07	Tram1	Intron
chr1	13573792	13573983	9.365	7.54768	10.9986	3.6069	17.7962	19.8933	5.71798	1.72758	-0.230541	0.871583	-2.31492	0.0157664	Tram1	Intron
chr1	13584286	13584620	40.3415	33.9646	10.9986	5.15272	23.416	32.3266	15.2479	9.7896	-2.22646	0.00364796	-1.15044	0.0998245	Tram1	Intron
chr1	13597185	13597496	20.8912	16.0388	1.37482	3.09163	44.0221	30.6688	5.24148	5.75859	-3.01715	0.00983832	-2.76371	5.31609e-05	Intergenic	Intergenic
chr1	13599426	13599608	7.20385	14.1519	2.06223	2.57636	17.7962	20.7222	5.71798	2.87929	-2.18767	0.127223	-2.14916	0.0179331	Intergenic	Intergenic
chr1	13615703	13616470	106.617	122.65	70.8034	53.073	210.744	204.735	65.7567	81.7719	-0.891442	0.0209803	-1.49729	2.81248e-09	Intergenic	Intergenic
chr1	13647634	13648311	19.4504	22.6431	172.54	191.166	11.2397	5.80221	188.693	176.213	3.11934	3.54521e-17	4.4423	7.96966e-24	Lactb2,Lactb2	Intron,Intron
chr1	13652262	13652401	2.16115	2.83038	9.62376	6.69853	2.80992	2.48666	18.1069	14.3965	1.71438	0.28041	2.6221	0.0166287	Lactb2,Lactb2	Intron,Intron
chr1	13658904	13659298	11.5262	24.53	83.8642	63.8937	39.3389	19.8933	43.8378	57.01	2.05568	0.000238959	0.773356	0.155432	Lactb2,Lactb2	Intron,Intron
chr1	13659440	13660959	290.315	317.946	791.898	834.74	504.85	542.921	730.948	783.168	1.42152	2.52586e-19	0.529601	4.62595e-06	Lactb2,Lactb2,Lactb2,Lactb2,Lactb2,Lactb2,Intergenic	Intron,Intron,Promoter,Promoter,Exon,Exon,Intergenic
chr1	13696800	13697024	7.92423	3.77384	4.12447	1.03054	24.3527	26.5244	3.81198	4.03101	-1.21827	0.504908	-2.6998	0.000915901	Intergenic	Intergenic
chr1	13752510	13752931	75.6404	50.9469	24.7468	36.5843	85.2344	79.5731	15.7244	29.3688	-1.04313	0.0546379	-1.88035	2.91846e-05	Intergenic	Intergenic
chr1	13840136	13840295	5.04269	1.88692	15.8105	20.6109	5.61985	5.80221	12.8654	24.1861	2.36125	0.0407786	1.69249	0.0703214	Intergenic	Intergenic
chr1	13865668	13866035	3.60192	12.265	46.0566	44.8286	4.68321	3.31555	55.2738	44.3411	2.56042	0.000709461	3.6501	5.87192e-07	Intergenic	Intergenic
chr1	13866190	13866737	5.76308	14.1519	76.3027	100.478	11.2397	24.8666	87.6756	86.9547	3.19206	2.05529e-08	2.25988	1.61838e-06	Intergenic	Intergenic
chr1	13873806	13874634	10.8058	31.1342	176.665	165.917	20.6061	19.8933	146.285	160.089	3.04623	2.70064e-05	2.91963	8.24183e-16	Intergenic	Intergenic
chr1	13980165	13980707	6.48346	13.2084	76.9901	74.7144	0.936641	0.828886	81.4811	76.5892	2.97725	3.00625e-07	6.48968	2.94718e-08	Intergenic	Intergenic
chr1	13993972	13994425	22.3319	14.1519	13.0608	9.79016	51.5153	52.2198	22.3954	19.0033	-0.686971	0.472587	-1.32255	0.00858455	Intergenic	Intergenic
chr1	14104535	14104927	3.60192	1.88692	63.9293	43.7981	1.87328	8.28886	39.5493	35.7032	4.25165	3.82058e-07	2.85959	0.000216202	Intergenic	Intergenic
chr1	14143967	14144171	4.32231	2.83038	18.5601	29.8858	0	4.14443	11.9124	25.9136	2.74545	0.00757546	3.13741	0.00834995	Intergenic	Intergenic
chr1	14190352	14190706	42.5027	21.6996	7.56153	2.57636	53.3886	58.8509	5.71798	10.3655	-2.70369	0.00270618	-2.82006	6.38164e-07	Eya1,Eya1,Eya1,Eya1,Eya1,Eya1,Eya1,Eya1,Eya1	Intron,Intron,Intron,Intron,Intron,Intron,Intron,Intron,Intron
chr1	14218684	14218916	7.92423	2.83038	24.0594	24.733	4.68321	2.48666	20.9659	27.0654	2.14868	0.027914	2.75736	0.00285843	Eya1,Eya1,Eya1,Eya1,Eya1,Eya1,Eya1,Eya1,Eya1	Intron,Intron,Intron,Intron,Intron,Intron,Intron,Intron,Intron
chr1	14253821	14254338	56.9104	77.3638	7.56153	5.15272	96.4741	106.926	18.5834	4.60687	-3.41619	3.05116e-08	-3.12312	0.00112616	Eya1,Eya1,Eya1,Eya1,Eya1,Eya1,Eya1,Eya1,Eya1	Intron,Intron,Intron,Intron,Intron,Intron,Intron,Intron,Intron
chr1	14499201	14499339	19.4504	13.2084	1.37482	1.54581	12.1763	8.28886	6.67097	4.03101	-3.48116	0.00735148	-0.923944	0.411158	Intergenic	Intergenic
chr1	14579413	14580019	7.92423	9.4346	46.0566	79.8671	7.49313	9.11775	53.8443	49.5238	2.87058	8.16618e-06	2.63356	1.39395e-05	Intergenic	Intergenic
chr1	14595971	14596661	3.60192	6.60422	142.294	158.188	4.68321	0	104.83	107.11	4.92456	9.79816e-19	5.5248	0.00147906	Intergenic	Intergenic
chr1	14746830	14747191	52.5881	63.2119	7.56153	2.06109	85.2344	86.2042	2.85899	5.75859	-3.64487	3.56243e-07	-4.34433	5.45818e-15	Intergenic	Intergenic
chr1	14747304	14747958	136.153	135.858	2.74965	8.24435	158.292	164.12	8.57696	12.093	-4.56565	7.03577e-19	-3.97725	7.58407e-26	Intergenic	Intergenic
chr1	14748086	14748224	15.1281	23.5865	2.74965	2.06109	12.1763	12.4333	1.90599	3.45515	-3.01647	0.0077513	-2.21359	0.049174	Intergenic	Intergenic
chr1	14750109	14750457	32.4173	33.9646	2.74965	3.09163	64.6283	50.5621	3.33549	6.9103	-3.49983	7.61273e-05	-3.51422	8.36276e-09	Intergenic	Intergenic
chr1	14755197	14755922	53.3085	66.9857	23.372	17.004	53.3886	60.5087	24.7779	16.124	-1.58001	0.00444021	-1.47123	0.00334856	Msc,Msc,Msc,Msc,Msc,Msc,LOC105243866,LOC105243866,LOC105243866,Msc	Intron,Promoter,Promoter,Promoter,Exon,Exon,Promoter,Promoter,Promoter,Exon
chr1	14762728	14763015	10.0854	6.60422	3.43706	2.06109	29.9725	32.3266	4.76498	6.33444	-1.62099	0.289366	-2.49694	0.000541844	LOC105243866	Promoter
chr1	14858473	14859267	97.9723	101.894	8.93635	15.9734	169.532	175.724	20.9659	13.8206	-2.98105	8.09561e-10	-3.29809	1.74324e-22	Intergenic	Intergenic
chr1	14924635	14925262	114.541	100.95	9.62376	27.3094	205.124	276.019	32.4019	24.1861	-2.51892	5.11272e-07	-3.08135	1.56025e-26	Intergenic	Intergenic
chr1	14925962	14926178	16.5688	9.4346	4.81188	0.515272	29.0359	28.1821	2.38249	5.18273	-2.34258	0.0989554	-2.94171	0.000256153	Intergenic	Intergenic
chr1	15007786	15007934	2.16115	2.83038	13.0608	21.6414	4.68321	0.828886	6.19447	8.06202	2.81423	0.0220803	1.39269	0.341508	Intergenic	Intergenic
chr1	15690881	15691079	1.44077	3.77384	19.2475	19.065	0	1.65777	18.5834	29.9446	2.92018	0.0136719	4.79888	0.000482409	Intergenic	Intergenic
chr1	15805018	15806725	317.69	326.437	1009.12	1090.31	485.18	445.112	1032.09	1021.57	1.70575	3.22328e-31	1.14383	3.99297e-28	Terf1,Terf1,Terf1	Promoter,Promoter,Promoter
chr1	15849835	15850089	16.5688	7.54768	2.74965	2.06109	33.7191	29.8399	4.28848	2.30343	-2.34415	0.0879563	-3.24813	3.41497e-05	Intergenic	Intergenic
chr1	15850196	15850281	4.32231	0.94346	0	1.03054	13.113	14.92	1.90599	4.60687	-2.30347	0.458209	-2.12665	0.0456099	Intergenic	Intergenic
chr1	15850827	15851085	11.5262	16.0388	7.56153	12.8818	40.2756	27.3533	5.71798	9.21374	-0.417271	0.703331	-2.18741	0.00157726	Intergenic	Intergenic
chr1	15883105	15883315	23.7727	16.0388	3.43706	2.57636	25.2893	17.4066	6.19447	3.45515	-2.74284	0.0113663	-2.12973	0.0138619	Sbspon	Intron
chr1	16103686	16106733	486.26	513.243	1276.52	1485.01	733.39	746.827	1256.05	1325.63	1.46797	4.97802e-26	0.801793	6.58461e-19	Rpl7,Rpl7,Rpl7,Intergenic,Rdh10	Promoter,Intron,Exon,Intergenic,Promoter
chr1	16161484	16162133	20.8912	16.0388	50.181	62.8631	5.61985	19.0644	66.2332	64.4962	1.60842	0.00576253	2.38453	2.91093e-05	Intergenic	Intergenic
chr1	16177523	16178138	63.3938	61.3249	17.8727	22.6719	73.058	111.9	22.3954	26.4895	-1.61544	0.00262075	-1.92554	4.31555e-06	Intergenic	Intergenic
chr1	16227164	16227376	10.8058	3.77384	6.1867	2.57636	27.1626	19.8933	4.28848	5.18273	-0.763203	0.629681	-2.31529	0.00489995	Intergenic	Intergenic
chr1	16227819	16228942	70.5977	61.3249	143.669	168.494	186.392	164.948	177.734	190.609	1.24068	0.000199791	0.0687509	0.793337	Intergenic,Stau2,Stau2,Stau2,Stau2,Stau2,Stau2,Stau2	Intergenic,Exon,Exon,Exon,Exon,Exon,Exon,Exon
chr1	16273760	16274196	48.2658	45.2861	1.37482	3.09163	39.3389	58.8509	8.57696	5.18273	-4.34046	2.21018e-07	-2.82386	4.25349e-06	Stau2,Stau2,Stau2,Stau2,Stau2,Stau2,Stau2	Intron,Intron,Intron,Intron,Intron,Intron,Intron
chr1	16533974	16534668	63.3938	72.6465	24.7468	28.3399	175.152	154.173	27.6369	33.9757	-1.35268	0.00720465	-2.42239	6.59231e-15	Intergenic	Intergenic
chr1	16570880	16571300	1.44077	2.83038	24.7468	57.1951	2.80992	1.65777	41.9318	39.7342	4.30933	1.89672e-05	4.20974	2.9584e-06	Ube2w,Ube2w,Ube2w,Ube2w,Ube2w	Intron,Exon,Exon,Intron,Intron
chr1	16617746	16619948	315.528	300.02	643.417	722.926	363.417	387.09	645.655	628.262	1.15031	8.0585e-12	0.762718	1.21858e-09	Ube2w,Ube2w,Ube2w,Ube2w,Ube2w,Ube2w,Ube2w,Ube2w,Ube2w,Ube2w,Ube2w,Ube2w,Ube2w,Ube2w,Ube2w,Intergenic	Intron,Intron,Intron,Intron,Intron,Promoter,Promoter,Promoter,Promoter,Promoter,Exon,Exon,Exon,Exon,Exon,Intergenic
chr1	16637672	16638099	1.44077	11.3215	43.3069	42.2523	7.49313	10.7755	22.8719	42.0377	2.80549	0.000962995	1.81875	0.0127294	Intergenic	Intergenic
chr1	16651103	16651390	5.04269	5.66076	28.1839	30.9163	3.74657	7.45998	20.9659	25.9136	2.47078	0.00493648	2.04992	0.0168642	Tceb1,Tceb1,Tceb1,Tceb1,Tceb1,Tceb1,Tceb1,Tceb1,Tceb1	Intron,Intron,Intron,Intron,Intron,Intron,Intron,Intron,Intron
chr1	16656139	16657838	342.183	356.628	887.448	1050.12	712.784	625.809	871.038	846.512	1.47316	5.22568e-21	0.361339	0.00120289	Tceb1,Tceb1,Tceb1,Tceb1,Tceb1,Tceb1,Tceb1,Tceb1,Tceb1,Tceb1,Tceb1,Tceb1,Tceb1,Tceb1,Tceb1,Tceb1,Tceb1,Tceb1,Tceb1,Tceb1,Tceb1,D030040B21Rik,Tceb1,Tceb1,Tceb1,Tceb1,Tceb1,Tceb1,Tceb1,Tceb1,Intergenic	Intron,Intron,Intron,Intron,Intron,Intron,Intron,Intron,Promoter,Promoter,Promoter,Promoter,Promoter,Promoter,Promoter,Promoter,Promoter,Exon,Exon,Intron,Intron,Promoter,Exon,Exon,Exon,Exon,Exon,Exon,Exon,Exon,Intergenic
chr1	16664944	16666072	112.38	102.837	274.965	225.689	180.772	205.564	213.948	186.002	1.21413	5.6326e-06	0.0500645	0.846173	Intergenic,Tmem70	Intergenic,Promoter
chr1	16685298	16685399	2.16115	0.94346	14.4356	18.5498	1.87328	4.14443	9.52996	10.3655	3.36948	0.012953	1.7101	0.171899	Intergenic	Intergenic
chr1	16687556	16689195	199.547	187.749	528.619	488.993	393.389	324.095	440.761	430.166	1.39156	2.71002e-13	0.28192	0.0803679	Intergenic,Ly96	Intergenic,Promoter
chr1	16689431	16689802	16.5688	15.0954	46.0566	29.8858	5.61985	10.7755	33.3549	40.3101	1.25515	0.0739684	2.1538	0.00187866	Ly96	Promoter
chr1	16696579	16696995	10.8058	24.53	61.867	64.9242	15.9229	26.5244	33.3549	30.5205	1.86707	0.00161173	0.584292	0.361711	Ly96	Promoter
chr1	16702960	16703148	2.88154	3.77384	14.4356	5.15272	3.74657	2.48666	24.7779	14.3965	1.55575	0.29021	2.66513	0.00902079	Intergenic	Intergenic
chr1	16746941	16747797	49.7065	49.0599	107.924	122.119	137.686	166.606	113.883	130.72	1.22077	0.00145912	-0.318272	0.259402	Intergenic	Intergenic
chr1	16797783	16798653	12.9669	19.8127	173.915	252.998	18.7328	25.6955	174.398	169.878	3.72758	6.00501e-21	2.94647	1.31331e-17	Intergenic	Intergenic
chr1	16801037	16801263	0	10.3781	32.3083	37.6148	5.61985	1.65777	20.4894	28.7929	2.76512	0.300452	2.78373	0.00295556	Intergenic	Intergenic
chr1	17097482	17098128	51.1473	47.173	78.3649	102.539	41.2122	37.2999	91.4876	66.2237	0.880766	0.042603	1.01005	0.016955	Jph1,Jph1,Jph1,Jph1,LOC108167615,Jph1,Jph1,Jph1,Jph1,Intergenic	Promoter,Promoter,Promoter,Promoter,Promoter,Exon,Exon,Exon,Exon,Intergenic
chr1	17451558	17451694	0.720385	2.83038	14.4356	18.5498	0.936641	0	18.1069	6.33444	3.28117	0.0153115	4.79138	0.0141577	Intergenic	Intergenic
chr1	17607744	17608259	1.44077	0	43.3069	55.1341	5.61985	4.97332	50.5088	49.5238	5.93756	3.47326e-06	3.24276	1.51412e-06	Pi15	Promoter
chr1	17608442	17608848	8.64462	0	44.6817	34.5232	5.61985	1.65777	33.8314	23.6102	3.17712	0.176754	3.01051	0.000775403	Pi15	Promoter
chr1	20259970	20260252	21.6115	14.1519	1.37482	9.27489	37.4657	24.8666	3.81198	8.63788	-1.71893	0.142119	-2.33954	0.00178963	Pkhd1,Pkhd1,Pkhd1	Intron,Intron,Intron
chr1	20302568	20303302	7.20385	13.2084	82.4894	95.3252	2.80992	4.14443	47.1733	41.4618	3.153	7.29299e-09	3.66119	2.30902e-06	Pkhd1,Pkhd1,Pkhd1	Intron,Intron,Intron
chr1	20311056	20311456	7.20385	5.66076	24.7468	31.9468	4.68321	9.11775	20.9659	12.093	2.13338	0.0147186	1.25476	0.188366	Pkhd1,Pkhd1,Pkhd1	Intron,Intron,Intron
chr1	20513848	20513990	3.60192	0.94346	11.686	10.8207	3.74657	2.48666	14.7714	18.4275	2.26333	0.123045	2.42079	0.0219297	Pkhd1,Pkhd1,Pkhd1,Pkhd1	Intron,Intron,Intron,Intron
chr1	20612829	20612972	5.04269	10.3781	15.8105	18.5498	0.936641	2.48666	12.3889	14.9723	1.17572	0.26087	2.97346	0.0190652	Pkhd1,Pkhd1,Pkhd1,Pkhd1,Pkhd1,Pkhd1,Pkhd1,Pkhd1	Exon,Exon,Exon,Exon,Intron,Intron,Intron,Intron
chr1	20740388	20740981	175.774	185.862	13.7482	22.1567	221.984	219.655	29.5429	36.855	-3.31092	7.3556e-19	-2.73969	1.15443e-23	Intergenic	Intergenic
chr1	20759747	20760169	73.4792	63.2119	13.0608	6.69853	87.1076	88.6909	21.4424	13.2447	-2.81677	1.40016e-06	-2.33079	8.71384e-08	Intergenic	Intergenic
chr1	20766398	20766939	59.0715	65.0988	26.1216	10.3054	80.5512	105.269	26.2074	10.9413	-1.78836	0.00315896	-2.30834	8.33754e-07	Intergenic	Intergenic
chr1	20767448	20767640	5.04269	2.83038	0.687411	2.57636	25.2893	16.5777	2.85899	4.03101	-1.25158	0.570223	-2.60986	0.00394143	Intergenic	Intergenic
chr1	20791503	20791788	30.2562	26.4169	8.93635	5.15272	44.0221	60.5087	9.52996	10.3655	-2.02598	0.0172137	-2.39768	1.64227e-05	Intergenic	Intergenic
chr1	20817013	20817607	16.5688	18.8692	54.3055	85.0198	12.1763	9.11775	58.1327	67.9513	1.98315	0.000335124	2.57139	2.54298e-06	Mcm3,Mcm3,Mcm3	Intron,Exon,Intron
chr1	20819547	20820790	183.698	180.201	475.001	554.947	244.463	270.217	516.524	528.062	1.50174	1.73876e-14	1.01952	1.74713e-12	Mcm3,Mcm3,Mcm3,Intergenic	Intron,Promoter,Exon,Intergenic
chr1	20824812	20825600	50.4269	66.9857	27.4965	34.0079	157.356	130.964	23.3484	27.6412	-0.924885	0.0859558	-2.50241	1.15843e-13	Intergenic	Intergenic
chr1	20912105	20912990	79.9627	78.3072	37.8076	43.2828	168.595	113.557	28.5899	27.0654	-0.962378	0.0334006	-2.3384	2.75774e-11	Paqr8	Promoter
chr1	20939109	20939347	9.365	7.54768	49.4936	24.2178	21.5428	16.5777	30.0194	47.7963	2.11069	0.00821734	1.02944	0.0904224	Intergenic	Intergenic
chr1	21004729	21004888	18.73	25.4734	2.06223	5.15272	15.9229	14.92	2.85899	2.87929	-2.58083	0.0126545	-2.42594	0.0172803	Tram2	Intron
chr1	21008802	21009139	13.6873	12.265	41.9321	44.3134	6.55649	4.97332	22.8719	16.6999	1.72962	0.00961903	1.78671	0.0460778	Tram2	Intron
chr1	21014407	21015244	23.7727	27.3604	327.895	369.965	15.9229	18.2355	250.638	322.481	3.77944	1.10708e-36	4.06305	4.41557e-35	Tram2	Intron
chr1	21031801	21031961	1.44077	5.66076	8.93635	21.6414	0	0	7.14747	2.30343	2.15398	0.0954672	4.87246	0.0403755	Tram2	Intron
chr1	21035805	21036502	17.2892	14.1519	70.8034	81.4129	14.0496	12.4333	66.7097	61.041	2.26912	1.45861e-05	2.27339	1.15699e-05	Tram2	Intron
chr1	21068564	21068795	4.32231	0	22.6846	24.733	0.936641	4.97332	11.9124	28.7929	3.35994	0.00449405	2.74893	0.0106852	Tram2	Intron
chr1	21069729	21070630	14.4077	9.4346	91.4257	101.508	11.2397	22.3799	84.8166	81.1961	2.99781	3.31993e-09	2.29124	1.50452e-06	Tram2	Intron
chr1	21078103	21079926	337.86	363.232	826.268	915.638	405.566	479.096	862.461	788.926	1.31519	2.30116e-17	0.899098	1.32144e-13	Tram2,Tram2,Tram2,Intergenic	Intron,Promoter,Exon,Intergenic
chr1	21086230	21086666	5.76308	4.7173	72.1782	107.692	8.42977	8.28886	71.4747	82.3478	4.09173	6.40551e-11	3.2013	3.0086e-09	Intergenic	Intergenic
chr1	21101220	21101558	16.5688	18.8692	46.744	44.3134	23.416	23.2088	27.1604	40.3101	1.36458	0.0299578	0.529666	0.392536	Intergenic	Intergenic
chr1	21218241	21219106	159.205	123.593	339.581	355.537	226.667	233.746	311.153	295.991	1.2922	3.06059e-08	0.399239	0.0307902	Gm28836,Tmem14a	Intron,Promoter
chr1	21271337	21271955	28.095	35.8515	70.116	59.7715	57.1351	58.8509	102.924	84.0754	1.02648	0.0464139	0.690428	0.0614928	Gm28836,Gm28836,Gm28836,Intergenic	Intron,Promoter,Exon,Intergenic
chr1	21324433	21324745	27.3746	24.53	10.3112	7.72907	37.4657	33.9843	6.67097	12.6689	-1.53341	0.0693132	-1.8974	0.00396403	Intergenic	Intergenic
chr1	21333688	21333841	6.48346	7.54768	3.43706	4.12217	19.6695	27.3533	1.42949	4.03101	-0.886177	0.56853	-3.13943	0.000655253	Intergenic	Intergenic
chr1	21419259	21419591	30.2562	34.908	3.43706	4.63744	46.8321	54.7065	6.67097	13.2447	-2.99803	0.000416556	-2.36665	4.62448e-05	Kcnq5,Kcnq5,Kcnq5	Intron,Intron,Intron
chr1	21425671	21426213	30.9765	45.2861	28.8713	29.3705	108.65	83.7175	38.5963	27.0654	-0.382677	0.554658	-1.54329	0.000101657	Kcnq5,Kcnq5,Kcnq5	Intron,Intron,Intron
chr1	21552720	21553018	36.7396	33.9646	9.62376	12.8818	28.0992	14.92	9.05346	16.124	-1.6449	0.0236656	-0.775103	0.336858	Kcnq5,Kcnq5,Kcnq5	Intron,Intron,Intron
chr1	21604087	21604315	12.9669	16.0388	4.81188	1.03054	28.0992	41.4443	0.476498	2.87929	-2.35233	0.0683782	-4.44077	1.26199e-06	Kcnq5,Kcnq5,Kcnq5	Intron,Intron,Intron
chr1	21633957	21634342	36.0192	36.795	2.06223	9.27489	40.2756	48.9043	18.5834	24.7619	-2.64094	0.00182325	-1.04676	0.0529507	Kcnq5,Kcnq5	Intron,Intron
chr1	21780690	21781182	91.4888	92.4591	13.0608	9.79016	92.7275	92.0064	23.8249	21.3068	-3.02132	9.25675e-10	-2.03076	3.42079e-07	Kcnq5,Kcnq5	Intron,Intron
chr1	21781367	21781688	41.7823	54.7207	6.1867	4.63744	27.1626	44.7599	6.67097	16.6999	-3.16666	7.29613e-06	-1.63887	0.0176829	Kcnq5,Kcnq5	Intron,Intron
chr1	21805148	21805547	51.1473	60.3815	2.74965	4.12217	50.5786	43.931	21.9189	6.33444	-3.99545	3.24135e-08	-1.72465	0.00699871	Kcnq5,Kcnq5	Intron,Intron
chr1	21829688	21830584	42.5027	37.7384	171.165	180.86	78.6779	69.6265	157.244	150.299	2.12957	1.81476e-10	1.05433	0.000235214	Kcnq5,Kcnq5	Intron,Intron
chr1	21837542	21837684	1.44077	5.66076	1.37482	5.15272	15.9229	18.2355	4.28848	5.18273	-0.0842323	0.969531	-1.8559	0.0437183	Kcnq5,Kcnq5	Intron,Intron
chr1	21950644	21950848	8.64462	18.8692	1.37482	1.54581	17.7962	35.6421	4.76498	5.18273	-3.22231	0.0217083	-2.43202	0.00251569	Kcnq5,Kcnq5	Intron,Intron
chr1	21951028	21951193	3.60192	7.54768	0	7.2138	19.6695	20.7222	3.33549	2.87929	-0.593052	0.773016	-2.69632	0.00323364	Kcnq5,Kcnq5	Intron,Intron
chr1	23255766	23257120	194.504	164.162	600.11	762.087	190.138	227.115	530.819	498.694	1.92266	1.079e-22	1.30076	6.79533e-17	Intergenic	Intergenic
chr1	23270987	23271224	2.88154	2.83038	26.1216	27.8247	2.80992	0	7.14747	16.124	3.23908	0.00137216	3.09784	0.0357175	Intergenic	Intergenic
chr1	23271529	23271739	5.04269	2.83038	23.372	18.5498	5.61985	9.11775	5.71798	9.21374	2.3882	0.024342	0.00789657	0.99527	Intergenic,Mir30a	Intergenic,Promoter
chr1	23292859	23293044	2.88154	3.77384	19.2475	19.5803	0.936641	2.48666	6.19447	8.06202	2.55629	0.0214096	2.03648	0.182283	Intergenic	Intergenic
chr1	23321301	23321570	33.8581	36.795	8.24894	8.75962	11.2397	30.6688	10.483	14.3965	-2.05159	0.00584506	-0.763511	0.361711	Intergenic	Intergenic
chr1	23379588	23381105	56.19	51.8903	255.03	325.652	68.3748	59.6798	279.228	233.799	2.42464	7.47208e-18	2.00594	7.64544e-16	Ogfrl1,Ogfrl1	Intron,Intron
chr1	23382477	23383974	269.424	299.077	646.854	825.98	532.012	501.476	662.332	598.893	1.37678	4.33355e-14	0.28897	0.0245522	Ogfrl1,Ogfrl1,Ogfrl1,Ogfrl1,Ogfrl1,Ogfrl1,Intergenic	Intron,Intron,Promoter,Promoter,Exon,Exon,Intergenic
chr1	23399465	23399966	36.7396	50.9469	53.6181	57.1951	138.623	150.857	48.1263	47.7963	0.344765	0.520612	-1.59403	1.30352e-07	Gm19673,Gm19673,Intergenic	Exon,Promoter,Intergenic
chr1	23419124	23419224	1.44077	0	8.93635	8.24435	3.74657	0	22.8719	9.21374	3.46918	0.078828	3.15355	0.0150323	Intergenic	Intergenic
chr1	23433615	23434270	4.32231	8.49114	103.112	112.329	8.42977	3.31555	78.1457	89.2581	4.11397	3.65549e-13	3.85898	6.23408e-11	Intergenic	Intergenic
chr1	23466147	23466811	7.92423	8.49114	68.7411	72.138	9.36641	7.45998	83.8636	108.837	3.10522	1.86348e-07	3.52247	8.40668e-12	Intergenic	Intergenic
chr1	23495576	23495686	3.60192	12.265	6.1867	10.8207	3.74657	1.65777	12.3889	17.8516	0.126492	0.929948	2.49978	0.0272047	Intergenic	Intergenic
chr1	23555853	23556122	5.04269	1.88692	32.3083	35.5537	1.87328	8.28886	31.9254	24.7619	3.24656	0.000384364	2.45506	0.00398816	Intergenic	Intergenic
chr1	23840986	23841148	4.32231	3.77384	0.687411	5.15272	18.7328	30.6688	2.85899	5.18273	-0.448619	0.832235	-2.63813	0.00186991	Smap1	Exon
chr1	23841978	23842391	22.3319	15.0954	2.06223	15.4581	58.0718	53.0487	9.05346	8.06202	-1.0749	0.342961	-2.69484	8.32999e-07	Smap1	Exon
chr1	23867504	23867632	0.720385	0.94346	9.62376	13.3971	0	2.48666	10.0065	12.6689	3.80968	0.0289879	3.13426	0.0322123	Smap1,Smap1,Smap1,Smap1	Intron,Intron,Intron,Intron
chr1	23882781	23883123	42.5027	42.4557	2.74965	7.72907	29.0359	24.8666	3.81198	4.60687	-2.98105	0.000103721	-2.68304	0.000700363	Smap1,Smap1,Smap1,Smap1	Intron,Intron,Intron,Intron
chr1	23892194	23892393	1.44077	0	26.809	20.6109	1.87328	2.48666	19.0599	7.48616	4.89752	0.000898461	2.60546	0.0371735	Smap1,Smap1,Smap1,Smap1	Intron,Intron,Intron,Intron
chr1	23915435	23915913	15.8485	14.1519	43.3069	53.073	14.9863	28.1821	54.7973	50.0997	1.68225	0.00771441	1.27281	0.0180359	Smap1,Smap1	Intron,Intron
chr1	23920858	23921080	2.16115	8.49114	20.6223	29.3705	9.36641	4.97332	21.4424	26.4895	2.27613	0.0237382	1.75057	0.0325074	Smap1,Smap1	Intron,Intron
chr1	23983112	23983567	5.76308	3.77384	38.495	57.1951	3.74657	5.80221	56.2268	61.6169	3.30847	1.67694e-05	3.61216	5.31752e-08	Gm26524	Promoter
chr1	23999210	23999636	10.0854	5.66076	29.5587	40.7065	11.2397	8.28886	35.2608	50.6756	2.14079	0.00727341	2.14126	0.000813387	Sdhaf4	Intron
chr1	24045692	24045806	18.73	11.3215	0.687411	2.06109	10.3031	11.6044	4.28848	1.72758	-3.40725	0.0129806	-1.84693	0.114496	Fam135a,Fam135a,Fam135a,Fam135a,Fam135a,Fam135a,Fam135a,Fam135a,Fam135a	Intron,Intron,Intron,Intron,Intron,Intron,Intron,Intron,Promoter
chr1	24099500	24100857	109.498	111.328	294.899	334.411	150.799	163.291	234.913	226.312	1.51243	2.86184e-10	0.553655	0.0112397	Fam135a,Fam135a,Fam135a,Fam135a,Fam135a,Fam135a,Fam135a,Fam135a,Fam135a,Fam135a,Fam135a,Fam135a,Fam135a,Fam135a,Fam135a,Intergenic	Intron,Intron,Intron,Intron,Intron,Promoter,Promoter,Promoter,Promoter,Promoter,Exon,Exon,Exon,Exon,Exon,Intergenic
chr1	24230444	24230641	0.720385	1.88692	17.1853	19.5803	3.74657	0	6.67097	6.9103	3.87512	0.00494158	1.89639	0.244806	Intergenic	Intergenic
chr1	24553447	24554056	4.32231	10.3781	68.7411	119.028	0	6.63109	53.8443	85.8029	3.72268	8.77279e-10	4.38315	0.0372587	Col19a1,Col19a1,Col19a1	Intron,Intron,Intron
chr1	24676741	24677068	9.365	5.66076	43.3069	25.2483	6.55649	3.31555	31.9254	35.1274	2.16792	0.00839634	2.7794	0.000372625	Intergenic,Lmbrd1	Intergenic,Promoter
chr1	24677444	24679824	437.273	398.14	1428.44	1444.31	562.921	634.098	1297.5	1291.65	1.77987	5.12434e-41	1.11142	4.484e-31	Intergenic,Lmbrd1,Lmbrd1,Lmbrd1	Intergenic,Promoter,Promoter,Promoter
chr1	24686123	24686920	8.64462	4.7173	84.5516	82.9587	13.113	3.31555	76.7162	54.1307	3.61505	1.08413e-09	3.02296	1.0847e-06	Lmbrd1	Promoter
chr1	26583774	26583924	2.88154	0	8.93635	6.69853	0	0.828886	19.0599	10.9413	2.36481	0.20482	5.09987	0.00645897	Intergenic	Intergenic
chr1	26584317	26584466	0	3.77384	21.3098	10.8207	0.936641	3.31555	9.52996	15.5482	3.1806	0.0286337	2.53094	0.0450695	Intergenic	Intergenic
chr1	28047767	28048321	8.64462	4.7173	62.5544	85.0198	1.87328	2.48666	66.7097	82.3478	3.43687	4.17775e-08	5.08388	3.84317e-10	Intergenic	Intergenic
chr1	28054005	28054334	2.16115	3.77384	68.7411	66.47	3.74657	0	63.3742	42.6135	4.54823	4.25812e-09	4.86121	0.00117367	Intergenic	Intergenic
chr1	30584955	30585141	1.44077	3.77384	24.0594	18.5498	2.80992	3.31555	7.14747	20.7309	3.07318	0.00729377	2.17623	0.0633903	Gm39615	Intron
chr1	30792921	30793340	66.9958	77.3638	22.6846	14.9429	147.053	145.055	26.6839	19.5792	-1.94978	0.000178605	-2.65046	6.58636e-15	Intergenic	Intergenic
chr1	30830045	30830620	38.9008	58.4946	4.81188	9.79016	116.144	74.5998	11.436	4.60687	-2.70893	0.000110187	-3.54297	3.19303e-12	Phf3,Phf3,Phf3,Phf3,Phf3	Intron,Intron,Exon,Exon,Exon
chr1	30839310	30839824	56.9104	56.6076	15.8105	5.66799	25.2893	37.2999	8.57696	9.7896	-2.43148	0.000195554	-1.77442	0.00944964	Phf3,Phf3,Phf3,Phf3,Phf3	Intron,Intron,Intron,Intron,Intron
chr1	30847712	30848534	104.456	96.233	2.74965	4.12217	132.066	115.215	16.2009	6.9103	-4.8405	2.29855e-15	-3.39435	2.62783e-15	Phf3,Phf3,Phf3,Phf3,Phf3	Intron,Intron,Intron,Intron,Intron
chr1	30871905	30872509	19.4504	21.6996	58.43	44.8286	39.3389	33.9843	38.1198	48.948	1.32752	0.0256148	0.247032	0.649134	Phf3,Phf3,Phf3	Intron,Intron,Intron
chr1	30872690	30874480	395.491	392.48	796.71	852.774	467.384	494.016	728.565	731.34	1.0662	2.29297e-12	0.601894	1.65692e-07	Phf3,Phf3,Phf3,Phf3,Phf3,Phf3,Phf3,Phf3,Phf3,Intergenic	Intron,Intron,Intron,Promoter,Promoter,Promoter,Exon,Exon,Exon,Intergenic
chr1	30920773	30921612	22.3319	8.49114	136.107	132.425	18.7328	23.2088	170.11	137.054	3.08421	2.60042e-11	2.86879	5.6976e-15	Intergenic	Intergenic
chr1	30930274	30930515	2.16115	0.94346	34.3706	27.8247	0.936641	8.28886	43.3613	47.2204	4.27118	0.000127103	3.25512	1.81027e-05	Intergenic	Intergenic
chr1	30930671	30930890	2.88154	5.66076	19.2475	23.7025	2.80992	0	15.7244	22.4585	2.35784	0.0239996	3.82473	0.00264907	Intergenic	Intergenic
chr1	30948368	30950765	535.246	514.186	2060.17	2311.51	709.038	649.018	1917.9	1937.19	2.05829	1.05831e-62	1.50652	7.18473e-73	Ptp4a1,Ptp4a1,Ptp4a1,Ptp4a1,Ptp4a1,Ptp4a1,Ptp4a1,Ptp4a1,Ptp4a1,Intergenic	Intron,Intron,Intron,Promoter,Promoter,Exon,Promoter,Exon,Exon,Intergenic
chr1	31050040	31050857	19.4504	7.54768	141.607	136.032	12.1763	10.7755	131.513	160.089	3.32042	6.94319e-13	3.66976	7.41552e-18	Gm29669	Intron
chr1	31153914	31154289	12.9669	10.3781	43.9943	48.9508	9.36641	2.48666	41.4553	24.1861	1.98657	0.00261624	2.49638	0.00211156	4931428L18Rik	Intron
chr1	32249728	32249863	0.720385	0	13.7482	11.8512	0	2.48666	4.76498	17.8516	4.97801	0.0145237	3.12875	0.0420066	Khdrbs2	Promoter
chr1	33565801	33566278	20.8912	41.5123	10.3112	30.401	71.1847	100.295	30.9724	34.5515	-0.595322	0.475545	-1.39212	0.000653173	Prim2,Prim2,Prim2	Intron,Intron,Intron
chr1	33578398	33579126	37.46	33.9646	14.4356	13.3971	162.039	140.911	16.6774	16.124	-1.36275	0.0520931	-3.20529	6.54237e-20	Prim2,Prim2,Prim2,Prim2	Intron,Intron,Intron,Intron
chr1	33612125	33612776	43.9435	30.1907	13.7482	8.75962	77.7412	116.044	13.3419	13.2447	-1.73571	0.01776	-2.86781	6.94217e-11	Prim2,Prim2,Prim2,Prim2	Intron,Intron,Intron,Intron
chr1	33615012	33615180	7.92423	1.88692	3.43706	0	20.6061	18.2355	1.90599	0.575859	-1.56857	0.491856	-3.92336	0.000405308	Prim2,Prim2,Prim2,Prim2,Prim2	Intron,Intron,Intron,Intron,Intron
chr1	33663285	33663442	2.16115	2.83038	11.686	14.4276	5.61985	0.828886	14.2949	17.8516	2.40036	0.0740832	2.34773	0.0353481	Prim2,Prim2,Prim2,Prim2,Prim2	Intron,Intron,Intron,Intron,Intron
chr1	33669297	33670923	184.418	166.993	367.765	369.965	322.205	300.886	398.829	422.104	1.06779	5.77125e-07	0.398088	0.0113901	Prim2,Prim2,Prim2,Prim2,Prim2,1700001G17Rik,Prim2,Prim2,Prim2,Prim2,Prim2,Prim2,Prim2,Prim2,Prim2,Prim2,Intergenic,Intergenic	Promoter,Promoter,Promoter,Promoter,Promoter,Promoter,Intron,Intron,Intron,Intron,Intron,Exon,Exon,Exon,Exon,Exon,Intergenic,Intergenic
chr1	33738994	33739659	47.5454	31.1342	73.553	107.176	62.755	73.7709	69.0922	102.503	1.19374	0.0112286	0.324993	0.423215	Intergenic	Intergenic
chr1	33742741	33743163	24.4931	21.6996	12.3734	18.0345	38.4023	47.2465	15.2479	13.8206	-0.598475	0.475327	-1.55875	0.0059714	Intergenic	Intergenic
chr1	33758481	33758804	18.73	16.0388	12.3734	13.3971	25.2893	26.5244	10.9595	5.18273	-0.433262	0.647932	-1.66938	0.0287532	Bag2,Bag2,Intergenic	Promoter,Promoter,Intergenic
chr1	33768098	33768366	6.48346	4.7173	31.6209	25.7636	9.36641	8.28886	10.9595	20.1551	2.34271	0.00833012	0.813813	0.384296	Zfp451,Zfp451,Zfp451,Zfp451,Zfp451	Intron,Intron,Intron,Intron,Intron
chr1	33768751	33769151	15.1281	11.3215	50.181	35.0385	35.5924	24.0377	26.6839	25.3378	1.67577	0.014677	-0.192434	0.769992	Zfp451,Zfp451,Zfp451,Zfp451,Zfp451	Intron,Intron,Intron,Intron,Intron
chr1	33813054	33815067	249.253	281.151	643.417	728.079	365.29	262.757	577.515	638.627	1.37404	2.79966e-15	0.956231	1.64199e-09	Zfp451,Zfp451,Zfp451,Zfp451,Zfp451,Zfp451,Zfp451,Zfp451,Zfp451,Zfp451,Zfp451,Zfp451,Zfp451,Zfp451,Zfp451,Zfp451,Zfp451,Zfp451,Zfp451,Zfp451,Zfp451,Zfp451,Zfp451,Zfp451,Zfp451,Zfp451,Zfp451,Zfp451,Zfp451,Zfp451	Intron,Intron,Intron,Intron,Intron,Intron,Promoter,Promoter,Exon,Exon,Exon,Exon,Exon,Exon,Intron,Intron,Intron,Intron,Intron,Intron,Exon,Exon,Exon,Exon,Exon,Exon,Promoter,Promoter,Promoter,Promoter
chr1	33868828	33869020	2.16115	1.88692	17.1853	15.9734	0	3.31555	8.10046	10.3655	3.02665	0.0179013	2.43213	0.101766	Bend6,Bend6	Intron,Intron
chr1	33869697	33869967	11.5262	6.60422	50.8684	52.0424	3.74657	4.97332	29.5429	22.4585	2.48334	0.000193334	2.57149	0.0028066	Bend6,Bend6	Intron,Intron
chr1	33876393	33877135	14.4077	3.77384	68.7411	72.138	7.49313	11.6044	56.2268	74.2858	2.9065	4.7357e-06	2.76095	8.33429e-07	Bend6,Bend6	Intron,Intron
chr1	33883004	33883907	56.19	45.2861	150.543	150.459	162.039	107.755	140.09	140.51	1.56251	6.21544e-06	0.0602391	0.856546	Bend6,Bend6,Bend6,Bend6,Bend6,Bend6,Bend6	Intron,Intron,Intron,Exon,Exon,Intron,Intron
chr1	33898171	33898752	18.73	12.265	57.0551	65.9548	4.68321	6.63109	28.1134	46.0687	1.97603	0.000627339	2.70184	0.000301833	Bend6,Bend6,Bend6	Intron,Intron,Intron
chr1	33899926	33900549	11.5262	21.6996	181.477	171.07	3.74657	9.94664	153.909	108.837	3.43869	2.34286e-17	4.23594	3.20628e-16	Bend6,Bend6,Bend6	Intron,Intron,Intron
chr1	33903550	33904428	33.1377	9.4346	153.98	124.696	2.80992	15.7488	111.024	109.989	2.69749	0.00258769	3.56243	0.000926473	Bend6,Bend6,Bend6	Intron,Intron,Intron
chr1	33906929	33908742	118.863	123.593	305.211	441.588	186.392	178.211	250.161	219.402	1.62631	1.05961e-10	0.366772	0.0929143	Bend6,Bend6,Bend6,Bend6,Bend6,Bend6,Dst,Dst,Dst,Dst,Dst,Dst,Dst,Dst,Bend6,Bend6,Bend6,Intergenic	Intron,Intron,Intron,Promoter,Promoter,Promoter,Promoter,Promoter,Promoter,Promoter,Promoter,Promoter,Promoter,Promoter,Exon,Exon,Exon,Intergenic
chr1	33916461	33916901	15.1281	13.2084	31.6209	71.1075	12.1763	9.11775	36.2138	50.0997	1.86035	0.00617019	2.02244	0.00125207	Dst	Promoter
chr1	33929126	33929514	39.6212	43.3992	0.687411	1.03054	26.226	46.4176	5.71798	5.75859	-5.56147	7.43429e-07	-2.66596	0.000142194	Dst	Promoter
chr1	33942676	33943078	36.0192	16.9823	16.4979	16.4887	60.8817	91.1775	17.6304	16.6999	-0.694107	0.396219	-2.14851	3.1825e-06	Dst	Promoter
chr1	34010672	34012007	111.66	96.233	264.653	313.8	192.948	163.291	206.324	181.971	1.4741	7.42729e-09	0.127264	0.618018	Dst,Dst	Promoter,Promoter
chr1	34060453	34060816	8.64462	5.66076	24.0594	32.4621	11.2397	4.97332	10.0065	8.63788	1.97081	0.0234931	0.212307	0.856494	Dst	Promoter
chr1	34150746	34151033	2.16115	0	26.809	24.733	7.49313	10.7755	6.19447	5.18273	4.44517	0.000578713	-0.684155	0.555637	Dst	Promoter
chr1	34212718	34212939	22.3319	33.9646	6.1867	4.12217	18.7328	14.0911	0.476498	1.72758	-2.45878	0.00563231	-3.94308	0.00117842	LOC108167617	Promoter
chr1	34236232	34236798	55.4696	51.8903	33.6832	52.0424	84.2977	92.0064	39.0728	39.7342	-0.319294	0.565221	-1.16263	0.00225267	LOC108167617	Promoter
chr1	34388926	34390069	21.6115	21.6996	153.98	172.101	14.9863	23.2088	119.124	120.93	2.91353	1.64589e-14	2.64223	5.4389e-11	Intergenic	Intergenic
chr1	34409808	34410147	7.20385	10.3781	26.809	40.1912	19.6695	14.92	28.5899	32.2481	1.94599	0.0147529	0.817326	0.209488	Intergenic	Intergenic
chr1	34434624	34435563	86.4462	124.537	231.658	330.804	167.659	135.937	201.559	232.071	1.42421	1.14783e-06	0.515464	0.030122	Intergenic	Intergenic
chr1	34438741	34440422	421.425	471.73	1061.36	1329.92	621.93	693.778	1138.83	1103.92	1.42369	1.12035e-19	0.768316	6.73128e-15	Ccdc115,Ccdc115,Imp4,Ccdc115,Ccdc115,Ccdc115,Ccdc115,Ccdc115,Intergenic	Intron,Promoter,Promoter,Exon,Intron,Exon,Intron,Exon,Intergenic
chr1	34459187	34460436	113.821	129.254	238.532	298.342	181.708	193.131	209.183	249.923	1.14796	1.17705e-05	0.290216	0.199124	Ptpn18,Ptpn18,Ptpn18,Gm32504,Gm32504,Gm32504,Gm32504,Gm32504,Gm32504	Promoter,Promoter,Promoter,Promoter,Exon,Intron,Exon,Intron,Exon
chr1	34462712	34463283	31.6969	27.3604	83.1768	104.6	65.5649	49.7332	77.6692	85.8029	1.66663	0.000201266	0.505954	0.201057	Gm32504	Promoter
chr1	34464266	34465118	31.6969	35.8515	197.287	212.807	50.5786	43.931	211.089	191.761	2.60768	1.46792e-15	2.0951	8.11837e-14	Gm32504	Promoter
chr1	34465367	34465838	10.8058	9.4346	74.9278	68.0158	36.529	19.8933	81.9576	56.4341	2.8131	8.52868e-07	1.30463	0.00799823	Gm32504	Promoter
chr1	34467598	34468632	19.4504	25.4734	74.9278	88.6267	7.49313	9.11775	72.9042	87.5305	1.87454	0.000127574	3.26539	1.15157e-09	Intergenic	Intergenic
chr1	34472384	34473996	155.603	158.501	383.576	336.988	315.648	258.613	290.664	293.112	1.19711	5.67833e-08	0.0256407	0.90552	Intergenic,Gm32566,Gm32566	Intergenic,Promoter,Promoter
chr1	34480844	34481131	12.9669	13.2084	57.7426	64.9242	26.226	17.4066	39.0728	54.1307	2.23026	0.000122138	1.0981	0.0485942	4930568A12Rik,4930568A12Rik,4930568A12Rik,4930568A12Rik	Intron,Intron,Intron,Intron
chr1	34481865	34482178	26.6542	11.3215	25.4342	17.004	35.5924	41.4443	8.10046	11.5172	0.14189	0.878835	-1.98215	0.00147763	4930568A12Rik,4930568A12Rik,4930568A12Rik,4930568A12Rik	Intron,Intron,Intron,Intron
chr1	34484267	34484985	23.0523	14.1519	142.982	150.975	23.416	24.0377	84.8166	108.261	2.96097	6.80538e-13	2.02249	1.18251e-06	4930568A12Rik,4930568A12Rik,4930568A12Rik,4930568A12Rik,4930568A12Rik,4930568A12Rik,4930568A12Rik,4930568A12Rik,4930568A12Rik,4930568A12Rik,4930568A12Rik,4930568A12Rik,4930568A12Rik	Intron,Intron,Intron,Intron,Promoter,Exon,Exon,Exon,Promoter,Promoter,Intron,Intron,Intron
chr1	34510367	34511374	132.551	100.007	108.611	83.9893	221.984	292.597	101.494	114.02	-0.279424	0.46893	-1.2592	4.88734e-08	Intergenic	Intergenic
chr1	34522302	34522461	3.60192	1.88692	15.8105	12.8818	0	1.65777	12.8654	14.9723	2.35928	0.0665388	4.00515	0.0086652	Intergenic	Intergenic
chr1	34536719	34537419	23.0523	29.2473	13.7482	21.6414	86.171	72.1131	10.9595	13.8206	-0.552269	0.487582	-2.68041	6.99153e-09	Prss40	Intron
chr1	34825989	34826463	35.2988	44.3426	8.24894	11.336	46.8321	50.5621	8.10046	5.18273	-2.01164	0.00442651	-2.86178	2.03589e-06	Fam168b,Fam168b	Intron,Intron
chr1	34827908	34828316	7.92423	4.7173	43.9943	60.2868	3.74657	12.4333	48.6028	53.5549	3.02288	1.95638e-05	2.63481	4.50247e-05	Fam168b,Fam168b	Intron,Intron
chr1	34828853	34829086	22.3319	24.53	4.12447	4.63744	26.226	29.011	9.52996	8.63788	-2.41376	0.011527	-1.60313	0.0231184	Fam168b,Fam168b	Intron,Intron
chr1	34831045	34831247	5.76308	3.77384	21.3098	19.5803	6.55649	8.28886	15.7244	12.6689	2.08415	0.0436456	0.934088	0.332528	Fam168b,Fam168b	Intron,Intron
chr1	34838361	34838641	12.2465	14.1519	46.0566	26.7941	14.0496	32.3266	34.3079	35.1274	1.46328	0.0482544	0.573351	0.375132	Fam168b,Fam168b	Intron,Intron
chr1	34839215	34839625	18.73	13.2084	70.116	87.0809	44.0221	23.2088	83.3871	78.8926	2.28829	1.25451e-05	1.28	0.00402858	Fam168b,Fam168b	Intron,Intron
chr1	34849420	34850850	110.939	133.971	361.578	297.312	150.799	174.895	289.711	322.481	1.43062	4.96257e-09	0.907607	4.20949e-06	Intergenic,Plekhb2,Plekhb2,Plekhb2,Plekhb2	Intergenic,Promoter,Promoter,Promoter,Promoter
chr1	34858680	34859078	13.6873	14.1519	62.5544	92.2336	1.87328	6.63109	75.7632	69.6789	2.47962	4.97407e-06	4.06173	7.07824e-10	Plekhb2	Promoter
chr1	34867229	34867596	15.1281	16.9823	89.3635	147.368	42.1489	40.6154	62.4212	71.4065	2.8905	1.11145e-09	0.692577	0.109869	Intergenic	Intergenic
chr1	34891682	34891796	7.92423	4.7173	7.56153	5.15272	25.2893	8.28886	3.81198	1.72758	-0.00691162	0.996533	-2.5743	0.0165988	Intergenic	Intergenic
chr1	35759677	35760071	14.4077	9.4346	35.7454	49.4661	2.80992	5.80221	41.4553	38.0067	1.82733	0.00886015	3.18774	2.80027e-05	Intergenic	Intergenic
chr1	35797186	35797414	26.6542	19.8127	0	1.54581	18.7328	14.92	6.19447	1.15172	-4.77877	0.000340738	-2.16479	0.0367473	Intergenic	Intergenic
chr1	35810465	35810962	10.8058	12.265	92.1131	97.9016	1.87328	10.7755	91.9641	78.3168	3.0487	1.76664e-09	3.73297	0.000204672	Intergenic	Intergenic
chr1	35813524	35814280	49.7065	36.795	217.909	287.006	44.0221	47.2465	212.518	186.578	2.53651	5.11871e-16	2.12803	6.19973e-14	Intergenic	Intergenic
chr1	35839485	35839804	15.1281	19.8127	39.1824	56.6799	10.3031	13.2622	40.5023	29.9446	1.46716	0.0209707	1.57789	0.0164058	Intergenic	Intergenic
chr1	35848696	35848914	6.48346	2.83038	5.49929	0.515272	30.9092	20.7222	5.71798	2.87929	-0.669453	0.744604	-2.56614	0.0018688	Intergenic	Intergenic
chr1	35849816	35849983	3.60192	4.7173	16.4979	11.336	0.936641	0	10.483	8.63788	1.74733	0.151483	4.43215	0.0263949	Intergenic	Intergenic
chr1	35860657	35861277	14.4077	6.60422	109.298	124.18	11.2397	8.28886	83.3871	81.7719	3.43708	5.96185e-12	3.08821	1.57573e-09	Intergenic	Intergenic
chr1	35889812	35891156	38.1804	32.0777	338.894	323.075	48.7054	45.5888	276.845	268.926	3.22719	1.96238e-30	2.53475	4.60053e-24	Intergenic	Intergenic
chr1	35904065	35904269	5.76308	6.60422	26.809	17.5192	0	0.828886	15.7244	4.60687	1.84208	0.058214	4.54383	0.024948	Intergenic	Intergenic
chr1	35971719	35972306	66.2754	62.2684	4.81188	20.0956	45.8954	33.1555	16.2009	11.5172	-2.33672	0.00039119	-1.50351	0.0124728	Intergenic	Intergenic
chr1	35995121	35995567	10.0854	7.54768	81.802	98.9321	9.36641	4.14443	67.1862	62.7686	3.34399	9.72039e-10	3.28721	5.748e-08	Intergenic	Intergenic
chr1	36024652	36025384	34.5785	39.6253	4.12447	11.8512	133.003	158.317	26.2074	28.7929	-2.18625	0.00559433	-2.40851	2.92745e-13	Intergenic	Intergenic
chr1	36025485	36025719	6.48346	18.8692	2.06223	2.06109	19.6695	33.1555	4.28848	7.48616	-2.60955	0.0619956	-2.18151	0.00583396	Intergenic	Intergenic
chr1	36052592	36053317	23.7727	26.4169	112.048	146.337	8.42977	15.7488	147.714	156.634	2.37025	7.11362e-09	3.63637	2.71793e-18	Intergenic	Intergenic
chr1	36067754	36069193	268.703	227.374	496.998	526.608	308.155	285.137	474.592	456.656	1.04223	4.3363e-08	0.65182	1.06744e-05	Intergenic,Hs6st1	Intergenic,Promoter
chr1	36073034	36073861	46.825	71.703	120.984	119.543	52.4519	48.0754	59.5622	74.2858	1.03016	0.00839244	0.411975	0.343214	Hs6st1	Promoter
chr1	36121305	36121447	0.720385	3.77384	13.7482	16.4887	2.80992	4.97332	11.9124	18.4275	2.81374	0.0374873	1.94855	0.0646626	Intergenic	Intergenic
chr1	36126131	36126425	2.16115	7.54768	34.3706	28.3399	8.42977	1.65777	34.7843	23.0343	2.73765	0.00293082	2.54991	0.00334005	Intergenic	Intergenic
chr1	36127349	36127974	22.3319	23.5865	43.3069	38.6454	29.0359	16.5777	53.8443	43.1894	0.835642	0.186953	1.09817	0.0457322	Intergenic	Intergenic
chr1	36128460	36129568	30.2562	35.8515	169.103	121.089	47.7687	18.2355	140.09	146.844	2.13704	3.16851e-08	2.12537	0.00212445	Intergenic,Gm33280	Intergenic,Promoter
chr1	36129895	36130825	31.6969	28.3038	198.662	174.162	25.2893	43.931	139.614	141.661	2.62966	2.60814e-14	2.01329	1.47282e-08	Gm33280	Promoter
chr1	36133162	36134064	20.1708	20.7561	109.986	87.0809	25.2893	32.3266	95.2996	63.3444	2.26656	8.57909e-07	1.46035	0.00120031	Intergenic	Intergenic
chr1	36149443	36149704	26.6542	32.0777	25.4342	30.9163	40.2756	38.1288	15.7244	9.7896	-0.0535209	0.942602	-1.61059	0.00796135	Uggt1,Uggt1	Intron,Intron
chr1	36159904	36160746	140.475	116.046	103.799	89.6573	281.929	268.559	84.3401	80.0444	-0.412095	0.244228	-1.74223	5.40687e-16	Uggt1,Uggt1,Uggt1,Uggt1,Uggt1,Uggt1	Intron,Intron,Exon,Exon,Intron,Intron
chr1	36160877	36161335	24.4931	33.9646	14.4356	10.8207	36.529	52.2198	5.71798	10.9413	-1.2127	0.121391	-2.43084	0.000108467	Uggt1,Uggt1	Intron,Intron
chr1	36162199	36163209	43.9435	50.9469	167.728	229.811	49.642	73.7709	189.646	157.785	2.07385	3.61652e-10	1.48877	8.13563e-07	Uggt1,Uggt1,Uggt1,Uggt1,Uggt1,Uggt1	Intron,Intron,Exon,Exon,Intron,Intron
chr1	36173510	36173744	2.88154	9.4346	29.5587	23.7025	5.61985	4.97332	20.0129	9.7896	2.14785	0.0237814	1.49975	0.141981	Uggt1,Uggt1,Uggt1,Uggt1	Exon,Exon,Intron,Intron
chr1	36200405	36200573	5.04269	2.83038	14.4356	23.1872	3.74657	1.65777	10.9595	5.18273	2.23989	0.044433	1.59877	0.25015	Uggt1,Uggt1	Intron,Intron
chr1	36230924	36231215	2.16115	2.83038	29.5587	31.4316	2.80992	0.828886	19.5364	24.1861	3.62727	0.00029805	3.61853	0.001221	Uggt1,Uggt1	Intron,Intron
chr1	36235042	36235704	72.7588	66.9857	37.1202	62.3479	128.32	126.82	51.4618	62.7686	-0.484128	0.335072	-1.16227	0.000245983	Uggt1,Uggt1	Intron,Intron
chr1	36243584	36244697	146.238	111.328	309.335	422.007	177.962	236.233	291.14	286.778	1.50206	3.49951e-09	0.477646	0.0212056	Uggt1,Uggt1,Uggt1,Uggt1,Gm39625,Uggt1,Uggt1,Intergenic	Intron,Intron,Promoter,Promoter,Promoter,Exon,Exon,Intergenic
chr1	36245937	36246176	3.60192	3.77384	21.9972	37.6148	3.74657	6.63109	27.6369	21.8826	3.02134	0.0015051	2.24442	0.00831195	Gm39625	Promoter
chr1	36270638	36271348	20.8912	24.53	46.0566	70.5922	27.1626	27.3533	50.5088	64.4962	1.36907	0.0170963	1.07487	0.0271425	Neurl3,Neurl3,Neurl3,Neurl3	Intron,Intron,Intron,Intron
chr1	36272361	36273914	82.1238	95.2895	371.89	388.515	141.433	155.002	375.48	287.353	2.10486	1.27152e-19	1.16155	2.10921e-08	Neurl3,Neurl3,Neurl3,Neurl3,Neurl3,Neurl3,Neurl3,Neurl3,Neurl3,Neurl3,Neurl3,Neurl3,Neurl3,Neurl3,Neurl3	Intron,Intron,Intron,Intron,Promoter,Exon,Exon,Exon,Exon,Promoter,Promoter,Intron,Intron,Intron,Promoter
chr1	36274318	36274915	23.7727	25.4734	57.0551	59.7715	75.868	101.124	53.8443	51.2514	1.24867	0.0220756	-0.753692	0.047931	Neurl3,Neurl3,Neurl3,Neurl3,Neurl3,Neurl3,Neurl3,Neurl3,Neurl3,Neurl3,Neurl3,Neurl3,Intergenic	Promoter,Promoter,Promoter,Intron,Intron,Intron,Promoter,Exon,Exon,Exon,Intron,Exon,Intergenic
chr1	36277329	36277588	20.1708	16.9823	63.9293	38.6454	18.7328	32.3266	29.0664	40.886	1.45578	0.0198217	0.44534	0.478847	Intergenic	Intergenic
chr1	36281874	36282150	15.1281	29.2473	7.56153	0.515272	31.8458	26.5244	13.8184	10.9413	-2.50288	0.0339051	-1.23178	0.0668135	Intergenic	Intergenic
chr1	36293232	36294997	249.253	210.392	96.2376	115.936	493.61	541.263	78.1457	103.079	-1.11385	5.3549e-05	-2.52078	2.56662e-45	Intergenic	Intergenic
chr1	36296120	36297313	177.935	178.314	61.1796	80.3824	346.557	378.801	70.5217	57.5859	-1.32579	2.40524e-05	-2.49685	1.47438e-33	Intergenic	Intergenic
chr1	36299239	36299483	14.4077	14.1519	9.62376	5.15272	26.226	31.4977	5.24148	13.2447	-0.963351	0.383872	-1.65949	0.0255548	Intergenic	Intergenic
chr1	36302297	36302616	18.73	21.6996	12.3734	3.09163	20.6061	31.4977	10.9595	6.33444	-1.41011	0.174456	-1.58451	0.036105	Intergenic	Intergenic
chr1	36307102	36310748	573.426	653.818	1236.65	1377.32	1156.75	1185.31	984.445	1029.06	1.0934	3.08402e-15	-0.218814	0.0184691	Intergenic,Arid5a,Arid5a	Intergenic,Promoter,Promoter
chr1	36310913	36311222	20.1708	17.9257	10.3112	13.9123	35.5924	22.3799	5.24148	8.63788	-0.649612	0.481204	-2.07002	0.00542957	Arid5a	Promoter
chr1	36311389	36311572	10.8058	14.1519	0	2.57636	14.9863	13.2622	6.19447	5.75859	-3.18995	0.039752	-1.23839	0.197291	Arid5a	Promoter
chr1	36311778	36312133	22.3319	13.2084	10.3112	7.72907	47.7687	18.2355	7.62397	6.33444	-0.991263	0.319282	-2.23205	0.00288513	Arid5a	Promoter
chr1	36312289	36312538	16.5688	4.7173	1.37482	3.09163	23.416	25.6955	9.52996	1.15172	-2.24103	0.136787	-2.17213	0.0181212	Arid5a	Promoter
chr1	36313528	36313944	12.9669	19.8127	8.24894	7.72907	32.7824	39.7866	9.05346	5.75859	-1.03206	0.316645	-2.28319	0.00058974	Arid5a	Promoter
chr1	36314913	36315280	15.1281	13.2084	6.87411	8.75962	35.5924	29.011	12.3889	8.63788	-0.855197	0.430867	-1.611	0.0151962	Arid5a	Promoter
chr1	36315426	36315726	22.3319	21.6996	6.87411	8.75962	23.416	28.1821	10.0065	8.63788	-1.48817	0.103674	-1.46736	0.0430021	Arid5a	Promoter
chr1	36320749	36322462	153.442	152.841	40.5573	42.7675	164.849	179.868	25.2544	38.0067	-1.87661	3.25278e-08	-2.45595	6.01313e-15	Intergenic	Intergenic
chr1	36325360	36326552	309.045	311.342	579.488	672.429	521.709	511.423	533.201	514.818	1.01425	6.66028e-09	0.0212743	0.887866	Intergenic	Intergenic
chr1	36345013	36345438	13.6873	8.49114	54.3055	62.8631	10.3031	4.97332	75.2867	62.7686	2.38454	0.000108945	3.19532	3.83759e-08	Kansl3,Kansl3,Kansl3,Kansl3,Kansl3,Kansl3,Kansl3,Kansl3,Kansl3,Kansl3,Kansl3,Kansl3,Kansl3,Kansl3,Kansl3,Kansl3,Kansl3,Kansl3	Exon,Exon,Exon,Exon,Exon,Exon,Intron,Intron,Intron,Intron,Intron,Intron,Exon,Exon,Exon,Exon,Exon,Exon
chr1	36357126	36357596	8.64462	1.88692	33.6832	44.3134	9.36641	11.6044	49.0793	41.4618	2.8378	0.000829919	2.10709	0.000536613	Kansl3,Kansl3,Kansl3,Kansl3,Kansl3,Kansl3	Intron,Intron,Intron,Intron,Intron,Intron
chr1	36368083	36369562	204.589	152.841	402.823	388.515	188.265	215.51	364.521	322.481	1.14057	3.40223e-07	0.766085	3.0677e-05	Kansl3,Kansl3,Kansl3,Kansl3,Kansl3,Kansl3,Kansl3,Kansl3,Kansl3,Kansl3,Kansl3,Kansl3,Kansl3,Kansl3,Kansl3,Kansl3,Kansl3,Intergenic	Exon,Promoter,Intron,Intron,Intron,Intron,Intron,Promoter,Promoter,Promoter,Promoter,Promoter,Exon,Exon,Exon,Exon,Exon,Intergenic
chr1	36435144	36435440	32.4173	35.8515	2.74965	5.66799	37.4657	36.471	6.67097	6.33444	-2.98931	0.000382202	-2.50558	0.000143526	Lman2l,Lman2l,Lman2l	Intron,Intron,Intron
chr1	36436602	36437059	13.6873	10.3781	39.8699	77.806	6.55649	4.97332	51.4618	58.1617	2.28539	0.000388922	3.2559	4.89187e-07	Lman2l,Lman2l,Lman2l	Intron,Intron,Intron
chr1	36437294	36437524	2.88154	6.60422	24.0594	17.5192	1.87328	12.4333	14.7714	11.5172	2.15797	0.0403893	0.861866	0.438407	Lman2l,Lman2l,Lman2l	Intron,Intron,Intron
chr1	36444546	36445891	116.702	161.332	296.962	357.598	216.364	290.11	238.249	245.892	1.24319	9.28866e-07	-0.0679788	0.775361	Lman2l,Lman2l,Lman2l,Lman2l,Lman2l,Lman2l,Lman2l,Lman2l,Lman2l,Intergenic	Intron,Intron,Intron,Promoter,Promoter,Promoter,Exon,Exon,Exon,Intergenic
chr1	36446018	36446756	11.5262	11.3215	92.1131	65.9548	11.2397	10.7755	92.4406	68.5272	2.78688	4.36052e-07	2.87302	1.76335e-08	Lman2l,Lman2l,Lman2l,Intergenic	Promoter,Promoter,Promoter,Intergenic
chr1	36469845	36470509	27.3746	15.0954	83.1768	87.0809	23.416	10.7755	34.3079	54.7066	1.98515	7.18638e-05	1.3878	0.0249383	Gm33454	Intron
chr1	36470841	36472563	229.803	222.657	551.991	681.189	442.095	430.192	490.316	500.997	1.44735	1.28773e-14	0.184625	0.19179	Gm33454,Gm33454,Cnnm4,Gm33454,Intergenic	Intron,Promoter,Promoter,Exon,Intergenic
chr1	36473346	36473530	10.0854	6.60422	9.62376	18.0345	3.74657	4.97332	21.9189	19.5792	0.726749	0.519694	2.24539	0.0145758	Cnnm4	Promoter
chr1	36492341	36492736	9.365	4.7173	54.9929	60.802	0.936641	4.97332	18.5834	22.4585	3.00949	6.48696e-06	2.76238	0.00722574	Intergenic	Intergenic
chr1	36508172	36508594	10.8058	8.49114	64.6167	64.4089	7.49313	1.65777	68.6157	53.5549	2.73052	4.92007e-06	3.77794	5.59362e-08	Intergenic	Intergenic
chr1	36511313	36513119	272.305	306.625	613.858	738.899	476.75	431.021	572.751	546.49	1.22797	7.38859e-12	0.303777	0.0243112	Intergenic,Cnnm3,Cnnm3	Intergenic,Promoter,Promoter
chr1	36539272	36539553	2.88154	7.54768	28.8713	37.0996	12.1763	6.63109	8.10046	12.6689	2.70193	0.00214726	0.145143	0.896707	Ankrd39,Ankrd39	Exon,Intron
chr1	36546448	36547864	246.372	195.296	547.179	631.723	369.973	336.528	407.882	475.083	1.41271	3.79837e-13	0.321291	0.0448515	Ankrd39,Ankrd39,Ankrd39,Ankrd39,Ankrd39,Ankrd39,Intergenic	Intron,Intron,Promoter,Promoter,Exon,Exon,Intergenic
chr1	36555847	36559296	231.243	247.187	500.435	509.088	413.995	484.899	326.401	377.187	1.07888	5.42591e-09	-0.356347	0.0270291	Sema4c,Sema4c,Sema4c,Sema4c,Sema4c,Sema4c,Sema4c,Sema4c,Sema4c,Sema4c,Sema4c,Sema4c,Sema4c,Sema4c,Sema4c,Sema4c,Sema4c,Sema4c,Sema4c,Sema4c,Sema4c,Sema4c,Sema4c,Sema4c,Sema4c,Sema4c,Sema4c,Sema4c,Sema4c,Sema4c,Sema4c,Sema4c,Sema4c,Sema4c,Sema4c,Sema4c,Intergenic	Intron,Intron,Intron,Intron,Intron,Intron,Promoter,Exon,Exon,Exon,Exon,Exon,Exon,Intron,Intron,Intron,Intron,Intron,Intron,Exon,Promoter,Promoter,Exon,Exon,Exon,Intron,Intron,Intron,Promoter,Promoter,Exon,Exon,Exon,Promoter,Exon,Exon,Intergenic
chr1	36568941	36569164	3.60192	16.0388	24.7468	21.1261	8.42977	9.11775	31.9254	26.4895	1.25183	0.204998	1.73507	0.0168369	Fam178b,Fam178b,Fam178b,Fam178b,Fam178b,Fam178b,Fam178b,Fam178b,Fam178b	Intron,Intron,Intron,Intron,Intron,Intron,Intron,Intron,Intron
chr1	36571370	36572450	30.9765	33.0211	288.025	329.259	31.8458	22.3799	247.302	279.867	3.27401	8.76535e-29	3.2898	5.78111e-29	Fam178b,Fam178b,Fam178b,Fam178b,Fam178b,Fam178b,Fam178b,Fam178b,Fam178b	Intron,Intron,Intron,Intron,Intron,Intron,Intron,Intron,Intron
chr1	36591223	36591752	18.0096	24.53	24.0594	22.6719	64.6283	69.6265	23.8249	13.2447	0.140563	0.86496	-1.84652	0.000150407	Fam178b,Fam178b,Fam178b,Fam178b,Fam178b,Fam178b,Fam178b,Fam178b	Intron,Intron,Intron,Intron,Intron,Intron,Intron,Intron
chr1	36646343	36646851	86.4462	74.5334	38.495	42.7675	98.3473	92.8353	39.5493	21.3068	-0.986167	0.0288384	-1.64169	8.33194e-05	Fam178b,Fam178b,Fam178b,Fam178b,Fam178b,Fam178b,Fam178b,Fam178b	Intron,Intron,Intron,Intron,Intron,Intron,Intron,Intron
chr1	36684143	36684564	27.3746	19.8127	54.3055	94.2947	36.529	59.6798	96.7291	48.3721	1.65089	0.00228716	0.592665	0.234862	Fam178b,Fam178b,Fam178b,Fam178b,Fam178b,Fam178b,Fam178b,Fam178b,Intergenic	Promoter,Promoter,Promoter,Promoter,Promoter,Promoter,Promoter,Promoter,Intergenic
chr1	36708514	36710368	204.589	231.148	508.684	637.906	413.059	409.47	530.819	510.211	1.39987	1.18365e-12	0.340402	0.0125338	Actr1b,Actr1b,Actr1b,Actr1b,Actr1b,Actr1b,Actr1b,Actr1b,Actr1b,Intergenic	Intron,Intron,Intron,Promoter,Promoter,Promoter,Exon,Exon,Exon,Intergenic
chr1	36719439	36719720	33.1377	38.6819	11.686	15.9734	55.2618	46.4176	14.2949	10.9413	-1.3673	0.0538522	-2.00342	0.000224347	Gm33533	Intron
chr1	36720208	36720402	20.8912	26.4169	6.87411	6.18326	26.226	14.92	17.6304	8.63788	-1.85735	0.0412379	-0.634415	0.443934	Gm33533	Intron
chr1	36722301	36723103	170.731	137.745	66.6789	33.4927	231.35	185.671	60.9917	50.0997	-1.63703	3.43236e-05	-1.9032	1.23858e-12	Gm33533	Intron
chr1	36760957	36761460	14.4077	21.6996	8.93635	13.9123	41.2122	42.2732	10.9595	7.48616	-0.646314	0.503933	-2.16964	0.00036236	Intergenic,Zap70	Intergenic,Promoter
chr1	36761572	36762529	79.2423	81.1376	52.2433	39.6759	119.89	121.017	30.9724	31.6722	-0.807741	0.074132	-1.94375	1.50613e-08	Intergenic,Zap70	Intergenic,Promoter
chr1	36764365	36764589	17.2892	12.265	13.7482	6.69853	14.9863	26.5244	8.57696	4.03101	-0.548377	0.609174	-1.70964	0.0497463	Zap70	Promoter
chr1	36766407	36767892	126.788	140.576	52.9307	39.1606	257.576	242.035	61.4682	58.7376	-1.54341	2.70643e-05	-2.05384	1.97954e-18	Zap70,Zap70	Promoter,Promoter
chr1	36772565	36772798	10.8058	13.2084	6.87411	6.69853	19.6695	53.0487	3.33549	9.7896	-0.820617	0.485334	-2.49524	0.00135727	Zap70	Promoter
chr1	36789423	36789730	5.76308	14.1519	35.7454	31.4316	6.55649	14.92	15.7244	25.9136	1.77882	0.0272177	0.940996	0.265617	Intergenic	Intergenic
chr1	36807105	36807472	12.9669	16.9823	19.9349	10.3054	51.5153	64.6531	14.2949	22.4585	0.00962008	0.992835	-1.66992	0.00101586	Tmem131,Tmem131,Tmem131,Tmem131,Tmem131	Intron,Intron,Intron,Intron,Intron
chr1	36879160	36879508	23.7727	32.0777	4.81188	1.03054	59.945	72.942	8.10046	14.3965	-3.31396	0.00100937	-2.57784	5.48634e-07	Tmem131,Tmem131,Tmem131,Tmem131,Tmem131	Intron,Intron,Intron,Intron,Intron
chr1	36879771	36879934	10.0854	5.66076	1.37482	5.15272	22.4794	11.6044	5.24148	1.72758	-1.2527	0.430111	-2.26257	0.0264876	Tmem131,Tmem131,Tmem131,Tmem131,Tmem131	Intron,Intron,Intron,Intron,Intron
chr1	36883642	36884200	55.4696	39.6253	31.6209	27.3094	119.89	90.3486	35.7373	18.4275	-0.697805	0.235548	-1.94433	3.60725e-06	Tmem131,Tmem131,Tmem131,Tmem131,Tmem131	Intron,Intron,Intron,Intron,Intron
chr1	36884306	36884446	9.365	5.66076	5.49929	6.18326	15.9229	9.94664	2.38249	0.575859	-0.36942	0.800648	-3.08586	0.0127379	Tmem131,Tmem131,Tmem131,Tmem131,Tmem131	Intron,Intron,Intron,Intron,Intron
chr1	36892455	36892960	69.8773	67.9292	8.93635	6.69853	103.967	135.108	3.33549	4.60687	-3.15328	5.44149e-08	-4.92897	6.43166e-21	Tmem131,Tmem131,Tmem131,Tmem131,Tmem131	Intron,Intron,Intron,Intron,Intron
chr1	36903841	36903974	12.2465	20.7561	2.74965	0.515272	10.3031	7.45998	3.33549	2.87929	-3.39949	0.0107291	-1.50924	0.221162	Tmem131,Tmem131,Tmem131,Tmem131,Tmem131	Intron,Intron,Intron,Intron,Intron
chr1	36914570	36914806	8.64462	5.66076	17.8727	26.2788	6.55649	9.11775	25.7309	21.3068	1.61712	0.0914303	1.58118	0.0482035	Tmem131,Tmem131,Tmem131,Tmem131,Tmem131	Intron,Intron,Intron,Intron,Intron
chr1	36919739	36920050	23.0523	10.3781	15.1231	5.66799	51.5153	48.0754	13.3419	10.9413	-0.709754	0.509744	-2.03112	0.000193674	Tmem131,Tmem131,Tmem131,Tmem131,Tmem131	Intron,Intron,Intron,Intron,Intron
chr1	36920236	36920897	63.3938	45.2861	18.5601	30.401	79.6145	77.9153	19.0599	21.8826	-1.14506	0.0520889	-1.94672	5.55554e-06	Tmem131,Tmem131,Tmem131,Tmem131,Tmem131	Intron,Intron,Intron,Intron,Intron
chr1	36927710	36927875	7.20385	3.77384	12.3734	20.0956	5.61985	1.65777	18.1069	20.7309	1.55101	0.168093	2.43938	0.0148527	Tmem131,Tmem131,Tmem131,Tmem131,Tmem131	Intron,Intron,Intron,Intron,Intron
chr1	36938814	36940693	302.562	330.211	646.167	704.376	397.136	368.854	608.488	547.066	1.0962	6.13109e-11	0.595071	1.09328e-05	Tmem131,Tmem131,Tmem131,Tmem131,Tmem131,Tmem131,Tmem131,Tmem131,Tmem131,Tmem131,Tmem131,Tmem131,Tmem131,Tmem131,Tmem131,Tmem131,Tmem131,Intergenic	Intron,Intron,Intron,Intron,Intron,Promoter,Promoter,Promoter,Promoter,Promoter,Exon,Exon,Exon,Exon,Exon,Intron,Exon,Intergenic
chr1	36947516	36948238	12.2465	16.9823	118.235	127.787	6.55649	8.28886	91.4876	123.81	3.0898	6.93529e-12	3.84965	1.35118e-13	Intergenic	Intergenic
chr1	36960515	36961199	22.3319	19.8127	82.4894	72.6533	28.0992	40.6154	60.5152	78.8926	1.87499	0.000163741	1.01389	0.0258663	Intergenic	Intergenic
chr1	36961941	36963033	79.9627	69.8161	259.154	254.544	67.4382	116.044	220.142	198.671	1.77385	4.06529e-11	1.1851	2.90057e-05	Intergenic	Intergenic
chr1	36965247	36966281	157.044	150.01	195.225	211.777	80.5512	83.7175	217.283	222.857	0.406656	0.143264	1.42108	4.80454e-09	Intergenic	Intergenic
chr1	36987058	36987643	18.0096	14.1519	103.112	97.9016	4.68321	11.6044	87.1991	72.5582	2.63324	2.14294e-08	3.27306	3.30487e-09	Intergenic	Intergenic
chr1	36988184	36988832	23.7727	8.49114	74.9278	109.238	12.1763	10.7755	100.065	67.3755	2.4841	5.94664e-06	2.87209	1.59991e-08	Intergenic	Intergenic
chr1	37000070	37000896	56.19	60.3815	134.045	131.91	103.031	97.8086	138.184	134.751	1.19165	0.000740922	0.44338	0.126184	Intergenic	Intergenic
chr1	37013007	37013616	19.4504	12.265	63.9293	92.2336	14.0496	10.7755	99.5881	73.134	2.28674	2.35498e-05	2.80657	1.12056e-08	Intergenic	Intergenic
chr1	37028874	37030155	73.4792	61.3249	194.537	163.856	131.13	132.622	159.15	128.416	1.4044	1.00144e-05	0.126675	0.673453	Vwa3b,Vwa3b,Vwa3b,Vwa3b,Vwa3b,Vwa3b	Promoter,Promoter,Promoter,Promoter,Promoter,Promoter
chr1	37307649	37309103	29.5358	36.795	151.231	181.891	64.6283	101.953	153.432	148.572	2.33791	6.95432e-11	0.853432	0.00593511	Inpp4a	Promoter
chr1	37309970	37310273	12.2465	6.60422	21.3098	22.1567	13.113	1.65777	22.8719	31.0964	1.19017	0.199194	1.8922	0.0322609	Inpp4a	Promoter
chr1	37310866	37311393	61.9531	61.3249	12.3734	27.8247	74.9313	84.5464	28.5899	25.3378	-1.59998	0.00654707	-1.56298	0.000166167	Inpp4a	Promoter
chr1	37317134	37318296	75.6404	73.5899	105.174	72.138	199.505	193.959	71.4747	63.9203	0.243786	0.578161	-1.53683	1.59711e-09	4930439A04Rik	Exon
chr1	37318404	37318979	48.9862	50.0034	20.6223	16.4887	78.6779	84.5464	20.4894	20.1551	-1.42054	0.0172898	-2.00588	2.02226e-06	4930439A04Rik	Exon
chr1	37322844	37323096	8.64462	4.7173	24.7468	32.9774	1.87328	8.28886	22.3954	24.1861	2.093	0.0170307	2.17153	0.0165633	4930439A04Rik	Exon
chr1	37327239	37327760	21.6115	36.795	32.3083	49.4661	128.32	111.071	33.3549	21.8826	0.499976	0.449026	-2.10634	1.22193e-08	4930439A04Rik	Exon
chr1	37350879	37351177	3.60192	1.88692	24.7468	39.1606	9.36641	3.31555	17.1539	20.7309	3.51104	0.000347049	1.59369	0.0846496	Inpp4a	Promoter
chr1	37356643	37357497	13.6873	17.9257	94.1754	78.3213	18.7328	13.2622	85.2931	80.6202	2.45711	1.06162e-06	2.38216	3.06151e-07	Inpp4a	Promoter
chr1	37419459	37419789	12.2465	8.49114	61.1796	55.1341	8.42977	18.2355	35.2608	44.917	2.47211	6.4098e-05	1.57488	0.0138372	Coa5	Exon
chr1	37427174	37427783	10.8058	16.9823	50.8684	81.9282	1.87328	9.94664	38.1198	63.3444	2.27617	0.000124136	3.06792	1.91441e-05	Coa5	Intron
chr1	37429339	37430787	274.467	258.508	654.416	761.056	399.009	396.208	557.026	571.252	1.40898	2.933e-16	0.504535	0.000109273	Coa5,Coa5,Unc50,Unc50,Unc50,Unc50,Coa5,Intergenic	Intron,Promoter,Promoter,Promoter,Promoter,Promoter,Exon,Intergenic
chr1	37457610	37457919	0	3.77384	53.6181	33.4927	8.42977	7.45998	40.5023	31.0964	4.59073	0.011488	2.17625	0.00169837	Mgat4a,Mgat4a,Mgat4a,Mgat4a,Mgat4a,Mgat4a	Intron,Intron,Intron,Intron,Intron,Intron
chr1	37468943	37469579	54.7492	67.9292	7.56153	14.9429	129.257	134.28	14.2949	20.1551	-2.42309	5.86666e-05	-2.94558	1.8382e-15	Mgat4a,Mgat4a,Mgat4a,Mgat4a,Mgat4a,Mgat4a	Intron,Intron,Intron,Intron,Intron,Intron
chr1	37471436	37471699	5.76308	9.4346	10.3112	2.57636	14.9863	34.8132	5.71798	9.7896	-0.248101	0.871875	-1.69798	0.0365064	Mgat4a,Mgat4a,Mgat4a,Mgat4a,Mgat4a,Mgat4a	Intron,Intron,Intron,Intron,Intron,Intron
chr1	37473997	37474479	21.6115	17.9257	50.8684	43.2828	18.7328	19.8933	42.4083	34.5515	1.24503	0.0432665	0.995424	0.089409	Mgat4a,Mgat4a,Mgat4a,Mgat4a,Mgat4a,Mgat4a	Intron,Intron,Intron,Intron,Intron,Intron
chr1	37474636	37475694	43.2231	39.6253	145.731	115.421	41.2122	53.8776	104.83	100.199	1.65164	1.31922e-05	1.10511	0.00248646	Mgat4a,Mgat4a,Mgat4a,Mgat4a,Mgat4a,Mgat4a	Intron,Intron,Intron,Intron,Intron,Intron
chr1	37477384	37479560	243.49	294.36	197.974	227.235	414.932	341.501	181.069	192.337	-0.334711	0.190673	-1.0178	1.00084e-08	Mgat4a,Mgat4a,Mgat4a,Mgat4a,Mgat4a,Mgat4a	Intron,Intron,Intron,Intron,Intron,Intron
chr1	37486288	37486800	6.48346	10.3781	83.1768	80.8976	2.80992	9.94664	81.4811	80.0444	3.30666	7.12234e-09	3.63119	5.23454e-10	Mgat4a,Mgat4a,Mgat4a,Mgat4a,Mgat4a,Mgat4a,4930594C11Rik	Intron,Intron,Intron,Intron,Intron,Intron,Exon
chr1	37491590	37492304	46.825	44.3426	134.045	155.612	60.8817	93.6642	178.21	165.271	1.66755	2.5748e-06	1.14727	9.72646e-05	Mgat4a,Mgat4a,Mgat4a,Mgat4a,Mgat4a,Mgat4a	Intron,Intron,Intron,Intron,Intron,Intron
chr1	37495816	37496525	22.3319	20.7561	51.5559	62.3479	57.1351	35.6421	51.4618	72.5582	1.40237	0.0129167	0.42071	0.385128	Mgat4a,Mgat4a,Mgat4a,Mgat4a,Mgat4a,Mgat4a,Mgat4a,Mgat4a,Mgat4a,Mgat4a,Mgat4a,Mgat4a,Mgat4a,Mgat4a,Mgat4a,Mgat4a,Mgat4a,Mgat4a	Intron,Intron,Intron,Intron,Intron,Intron,Exon,Exon,Exon,Exon,Exon,Exon,Intron,Intron,Intron,Intron,Intron,Intron
chr1	37534436	37534970	13.6873	1.88692	72.8656	75.2296	7.49313	6.63109	45.7438	54.7066	3.22464	0.00892754	2.83208	8.08378e-06	Mgat4a,Mgat4a,Mgat4a,Mgat4a,Mgat4a,Mgat4a	Intron,Intron,Intron,Intron,Intron,Intron
chr1	37544069	37544888	60.5123	75.4768	28.8713	23.7025	139.56	103.611	20.4894	24.7619	-1.37277	0.00707768	-2.42853	7.79933e-11	Intergenic	Intergenic
chr1	37559705	37560304	7.92423	9.4346	70.116	115.421	2.80992	9.94664	75.2867	91.5615	3.43039	1.41485e-09	3.67683	3.00955e-10	Intergenic	Intergenic
chr1	37560425	37560659	6.48346	1.88692	28.1839	16.4887	1.87328	0.828886	13.8184	13.8206	2.37136	0.0269096	3.37734	0.0118707	Intergenic	Intergenic
chr1	37561757	37562341	6.48346	6.60422	71.4908	76.7755	1.87328	10.7755	74.8102	73.7099	3.50353	1.12245e-08	3.53522	0.000400496	Intergenic	Intergenic
chr1	37565479	37565732	3.60192	4.7173	21.9972	15.4581	1.87328	3.31555	8.10046	2.87929	2.17746	0.0466249	1.08145	0.496238	Intergenic	Intergenic
chr1	37574760	37574994	12.2465	34.908	4.81188	15.9734	41.2122	18.2355	6.67097	4.60687	-1.1539	0.250845	-2.38464	0.00227137	Intergenic	Intergenic
chr1	37585680	37586522	67.7162	59.438	176.665	179.315	89.9176	97.8086	152.479	131.296	1.48174	2.16511e-06	0.596421	0.0408975	Intergenic	Intergenic
chr1	37605851	37605947	2.16115	0	15.8105	18.0345	0	2.48666	20.4894	10.9413	3.85538	0.00878575	3.60634	0.00794153	Intergenic	Intergenic
chr1	37614892	37615235	14.4077	7.54768	13.7482	6.69853	28.0992	32.3266	6.67097	14.3965	-0.123107	0.921453	-1.53401	0.0301173	LOC102637491,2010300C02Rik,2010300C02Rik,2010300C02Rik,2010300C02Rik,2010300C02Rik,2010300C02Rik	Promoter,Intron,Intron,Intron,Intron,Intron,Intron
chr1	37619569	37619949	5.76308	21.6996	7.56153	6.18326	36.529	45.5888	8.57696	2.87929	-0.987406	0.413811	-2.81627	4.52898e-05	2010300C02Rik,2010300C02Rik,2010300C02Rik,2010300C02Rik,2010300C02Rik,2010300C02Rik	Intron,Intron,Intron,Intron,Intron,Intron
chr1	37638747	37638896	2.88154	2.83038	13.0608	11.8512	0	1.65777	7.14747	12.093	2.12315	0.111147	3.47536	0.0378122	2010300C02Rik,2010300C02Rik,2010300C02Rik,2010300C02Rik,2010300C02Rik,2010300C02Rik	Intron,Intron,Intron,Intron,Intron,Intron
chr1	37639039	37639474	25.2135	13.2084	50.181	69.0464	20.6061	30.6688	41.9318	37.4308	1.61944	0.00667824	0.626362	0.272765	2010300C02Rik,2010300C02Rik,2010300C02Rik,2010300C02Rik,2010300C02Rik,2010300C02Rik	Intron,Intron,Intron,Intron,Intron,Intron
chr1	37734911	37735161	3.60192	2.83038	16.4979	25.7636	2.80992	1.65777	24.3014	32.2481	2.7092	0.0132443	3.67584	0.00019402	Intergenic	Intergenic
chr1	37799576	37799754	10.8058	0.94346	6.1867	4.12217	19.6695	23.2088	5.71798	6.33444	-0.218446	0.903824	-1.83446	0.025174	Tsga10,Tsga10,Tsga10,Tsga10,Tsga10,Tsga10,Tsga10,Tsga10,Tsga10,Tsga10	Intron,Intron,Intron,Intron,Intron,Intron,Intron,Intron,Intron,Intron
chr1	37847017	37847518	15.8485	7.54768	17.8727	22.1567	66.5015	41.4443	16.6774	26.4895	0.761797	0.419563	-1.32587	0.0129763	Tsga10,Tsga10,Tsga10,Tsga10,Tsga10,Tsga10,Tsga10,Tsga10,Tsga10,Tsga10,Tsga10,Tsga10,Tsga10,Tsga10,Tsga10	Intron,Intron,Intron,Intron,Intron,Intron,Intron,Intron,Intron,Intron,Intron,Intron,Intron,Intron,Intron
chr1	37848322	37848606	4.32231	3.77384	14.4356	10.3054	17.7962	32.3266	8.57696	9.21374	1.6038	0.20721	-1.50009	0.0483236	Tsga10,Tsga10,Tsga10,Tsga10,Tsga10,Tsga10,Tsga10,Tsga10,Tsga10,Tsga10,Tsga10,Tsga10,Tsga10,Tsga10,Tsga10	Intron,Intron,Intron,Intron,Intron,Intron,Intron,Intron,Intron,Intron,Intron,Intron,Intron,Intron,Intron
chr1	37860381	37860688	11.5262	7.54768	36.4328	57.1951	5.61985	4.14443	37.1668	38.0067	2.28394	0.00111423	2.95233	7.84074e-05	Tsga10,Tsga10,Tsga10,Tsga10,Tsga10,Tsga10,Tsga10,Tsga10,Tsga10,Tsga10,Tsga10,Tsga10,Tsga10	Intron,Intron,Intron,Intron,Intron,Intron,Intron,Intron,Intron,Intron,Intron,Intron,Intron
chr1	37867098	37867380	13.6873	8.49114	61.1796	54.1035	19.6695	10.7755	41.4553	45.4928	2.35886	0.000139829	1.52277	0.0107208	Tsga10,Intergenic	Promoter,Intergenic
chr1	37867787	37868226	9.365	3.77384	39.1824	44.3134	2.80992	12.4333	25.7309	36.855	2.63401	0.000635012	2.0138	0.0114244	Intergenic,Lipt1	Intergenic,Promoter
chr1	37903231	37903515	18.73	15.0954	42.6195	37.0996	14.9863	4.97332	23.8249	38.5825	1.22956	0.0664389	1.65735	0.0294645	Intergenic	Intergenic
chr1	37904865	37905298	8.64462	3.77384	40.5573	43.2828	6.55649	4.14443	44.7908	41.4618	2.72219	0.000411198	3.02314	1.89041e-05	Intergenic	Intergenic
chr1	37996441	37998750	487.7	475.504	1054.49	1100.1	775.539	760.918	891.051	933.467	1.16134	3.51445e-17	0.247646	0.0170151	Txndc9,Txndc9,Txndc9,Txndc9,Txndc9,Eif5b,Txndc9,Intergenic	Intron,Intron,Promoter,Promoter,Exon,Promoter,Exon,Intergenic
chr1	38011633	38013062	56.19	46.2296	348.518	289.583	49.642	64.6531	247.302	268.926	2.63046	8.18231e-22	2.16958	7.75889e-18	Gm34448	Exon
chr1	38013163	38013526	6.48346	7.54768	54.9929	46.8897	12.1763	4.14443	34.7843	50.0997	2.86592	3.18032e-05	2.39662	0.000554315	Gm34448	Exon
chr1	38159374	38159532	12.2465	10.3781	2.74965	3.09163	21.5428	15.7488	1.42949	2.30343	-1.95204	0.145167	-3.33524	0.00129299	Intergenic	Intergenic
chr1	38237090	38237315	25.2135	18.8692	3.43706	4.12217	5.61985	14.92	5.71798	2.87929	-2.54044	0.01136	-1.2529	0.292189	Aff3,Aff3,Aff3,Aff3,Aff3	Intron,Intron,Intron,Intron,Intron
chr1	38271342	38271852	26.6542	18.8692	6.87411	3.6069	61.8183	63.8243	15.2479	15.5482	-2.1424	0.0274999	-2.02917	2.48007e-05	Aff3,Aff3,Aff3,Aff3,Aff3	Intron,Intron,Intron,Intron,Intron
chr1	38274849	38275005	10.8058	12.265	2.74965	1.54581	18.7328	18.2355	2.38249	4.60687	-2.44445	0.0799836	-2.41982	0.0103724	Aff3,Aff3,Aff3,Aff3,Aff3	Intron,Intron,Intron,Intron,Intron
chr1	38393496	38393893	12.9669	7.54768	43.3069	37.0996	9.36641	29.8399	9.05346	25.3378	1.95155	0.00708098	-0.204825	0.829978	Aff3,Aff3,Aff3,Aff3,Aff3	Intron,Intron,Intron,Intron,Intron
chr1	38401850	38402187	5.04269	3.77384	46.744	36.5843	4.68321	3.31555	14.2949	14.9723	3.22365	6.44908e-05	1.87789	0.0725478	Aff3,Aff3,Aff3,Aff3,Aff3	Intron,Intron,Intron,Intron,Intron
chr1	38406237	38406461	30.2562	26.4169	4.12447	4.12217	13.113	38.1288	1.42949	4.60687	-2.78234	0.00181372	-3.12114	0.000985577	Aff3,Aff3,Aff3,Aff3,Aff3	Intron,Intron,Intron,Intron,Intron
chr1	38407031	38407416	28.095	15.0954	4.81188	4.12217	43.0855	77.9153	9.52996	12.6689	-2.28528	0.0237127	-2.45647	7.50565e-06	Aff3,Aff3,Aff3,Aff3,Aff3	Intron,Intron,Intron,Intron,Intron
chr1	38437728	38438159	33.8581	54.7207	25.4342	34.5232	60.8817	77.9153	21.9189	30.5205	-0.551463	0.377498	-1.41139	0.0018819	Aff3,Aff3,Aff3,Aff3,Aff3	Intron,Intron,Intron,Intron,Intron
chr1	38470176	38470335	23.0523	19.8127	5.49929	5.15272	10.3031	14.0911	7.62397	2.87929	-2.01257	0.0374985	-1.2035	0.26458	Aff3,Aff3,Aff3,Aff3,Aff3	Intron,Intron,Intron,Intron,Intron
chr1	38470944	38471147	36.0192	31.1342	2.06223	5.66799	22.4794	21.551	0.476498	7.48616	-3.08068	0.000398058	-2.50459	0.0135996	Aff3,Aff3,Aff3,Aff3,Aff3	Intron,Intron,Intron,Intron,Intron
chr1	38557546	38558246	46.825	60.3815	30.2461	47.9203	130.193	132.622	57.6562	62.7686	-0.445268	0.431098	-1.12738	0.00023273	Aff3,Aff3,Aff3,Aff3,Aff3	Intron,Intron,Intron,Intron,Intron
chr1	38580579	38580860	8.64462	6.60422	21.3098	35.5537	11.2397	17.4066	18.5834	19.0033	1.89473	0.0293721	0.386415	0.638029	Aff3,Aff3,Aff3,Aff3,Aff3	Intron,Intron,Intron,Intron,Intron
chr1	38583176	38583545	28.095	33.9646	6.1867	6.18326	51.5153	50.5621	8.10046	4.03101	-2.32459	0.00447026	-3.05218	5.54982e-07	Aff3,Aff3,Aff3,Aff3,Aff3	Intron,Intron,Intron,Intron,Intron
chr1	38597848	38598054	15.1281	22.6431	0.687411	0.515272	26.226	17.4066	3.81198	4.60687	-4.99057	0.00107374	-2.37566	0.00597808	Aff3,Aff3,Aff3,Aff3,Aff3	Intron,Intron,Intron,Intron,Intron
chr1	38632404	38633062	32.4173	41.5123	19.9349	12.8818	88.9809	99.4664	29.0664	21.8826	-1.17763	0.0918424	-1.88224	2.20723e-06	Gm34596,Gm34596,Gm34596	Promoter,Promoter,Promoter
chr1	38647367	38647812	51.1473	73.5899	23.372	30.401	77.7412	93.6642	40.5023	40.886	-1.20398	0.0260284	-1.07615	0.00550803	Intergenic	Intergenic
chr1	38657353	38658350	123.906	105.668	16.4979	14.4276	227.604	254.468	18.5834	21.3068	-2.89929	2.83632e-11	-3.60083	1.47823e-35	Intergenic	Intergenic
chr1	38658454	38658722	20.1708	22.6431	2.74965	4.63744	33.7191	32.3266	2.38249	6.9103	-2.51489	0.0138643	-2.85704	0.000172068	Intergenic	Intergenic
chr1	38659379	38659667	6.48346	8.49114	2.06223	1.03054	17.7962	19.0644	2.85899	3.45515	-2.29591	0.182077	-2.55129	0.00694037	Intergenic	Intergenic
chr1	38662279	38663489	86.4462	91.5157	31.6209	48.9508	200.441	169.922	58.1327	36.855	-1.13416	0.0120249	-1.95421	9.38654e-11	Intergenic	Intergenic
chr1	38663731	38664099	27.3746	25.4734	4.12447	5.66799	44.0221	33.1555	13.8184	1.15172	-2.42168	0.00717022	-2.35727	0.143817	Intergenic	Intergenic
chr1	38664276	38665346	85.0054	71.703	41.9321	28.8552	258.513	200.591	50.0323	54.1307	-1.15613	0.0153872	-2.14002	1.75175e-16	Intergenic	Intergenic
chr1	38665521	38665969	54.0288	48.1165	21.3098	13.3971	133.94	125.991	23.8249	7.48616	-1.56994	0.00979188	-3.0447	0.000166384	Intergenic	Intergenic
chr1	38693994	38694823	65.555	56.6076	26.1216	34.5232	235.097	198.104	44.7908	32.8239	-1.00684	0.0562561	-2.47236	7.84971e-19	Intergenic	Intergenic
chr1	38723326	38724144	56.19	66.0422	17.8727	25.7636	125.51	188.157	19.5364	10.3655	-1.47552	0.00711832	-3.37516	5.5545e-18	Intergenic	Intergenic
chr1	38769965	38770396	37.46	27.3604	21.3098	30.9163	42.1489	58.8509	13.3419	6.33444	-0.310942	0.661494	-2.34591	7.83882e-05	Intergenic	Intergenic
chr1	38770797	38771346	20.1708	24.53	5.49929	3.09163	56.1985	74.5998	3.81198	1.72758	-2.39702	0.0156324	-4.52894	7.91784e-12	Intergenic	Intergenic
chr1	38777028	38778230	249.253	251.904	177.352	198.895	562.921	615.034	202.512	165.271	-0.411738	0.10284	-1.67638	1.94576e-28	Intergenic	Intergenic
chr1	38787526	38787780	11.5262	9.4346	41.9321	26.7941	19.6695	39.7866	30.9724	29.9446	1.70275	0.0274032	0.0287993	0.967313	Intergenic	Intergenic
chr1	38794841	38795126	15.1281	0	2.74965	2.06109	38.4023	38.9577	1.42949	5.18273	-1.67615	0.390987	-3.58976	2.51959e-06	Lonrf2,Lonrf2	Exon,Exon
chr1	38881335	38881573	20.8912	33.0211	3.43706	1.03054	35.5924	24.0377	3.33549	2.30343	-3.64567	0.000496825	-3.38709	4.22237e-05	Chst10,Chst10,Chst10	Intron,Intron,Intron
chr1	38886012	38886298	21.6115	16.0388	11.686	22.6719	40.2756	36.471	6.19447	13.8206	-0.127725	0.893701	-1.95372	0.00274172	Chst10,Chst10,Chst10	Intron,Intron,Intron
chr1	38897128	38898311	115.982	125.48	61.867	65.4395	246.337	225.457	75.2867	55.8583	-0.921304	0.0110689	-1.84091	1.82437e-13	Chst10,Chst10,Chst10,Chst10,Chst10,Chst10,Chst10,Chst10,Chst10,Intergenic	Intron,Intron,Intron,Promoter,Promoter,Promoter,Exon,Exon,Exon,Intergenic
chr1	38899884	38900124	15.8485	29.2473	2.06223	2.06109	34.6557	27.3533	6.19447	8.63788	-3.44494	0.00180359	-2.06954	0.00318007	Intergenic	Intergenic
chr1	38987039	38988472	252.135	292.473	528.619	561.131	384.96	373.828	549.402	543.035	1.0041	4.75426e-08	0.526286	7.45179e-05	Intergenic,Pdcl3	Intergenic,Promoter
chr1	39001209	39001457	11.5262	6.60422	41.2447	40.7065	9.36641	14.0911	26.2074	20.1551	2.15664	0.00305569	0.97941	0.200903	Intergenic	Intergenic
chr1	39025237	39025844	24.4931	16.0388	19.9349	13.3971	65.5649	55.5354	20.0129	15.5482	-0.295049	0.743306	-1.76169	0.000305898	Intergenic	Intergenic
chr1	39089808	39090136	18.0096	18.8692	8.93635	14.4276	35.5924	48.9043	15.2479	5.75859	-0.649287	0.493069	-1.99304	0.00214919	Intergenic	Intergenic
chr1	39192417	39192730	10.8058	9.4346	9.62376	4.12217	44.0221	39.7866	10.0065	7.48616	-0.574467	0.65722	-2.25263	0.000217393	Intergenic,Npas2	Intergenic,Promoter
chr1	39193474	39194534	74.92	62.2684	30.9335	37.0996	119.89	110.242	27.6369	36.2791	-1.01075	0.0408882	-1.8529	2.23159e-07	Intergenic,Npas2,Npas2	Intergenic,Promoter,Promoter
chr1	39201794	39202003	18.73	19.8127	8.93635	2.57636	24.3527	23.2088	10.0065	1.72758	-1.77104	0.0966646	-1.99308	0.0262835	Npas2	Promoter
chr1	39205088	39205330	7.20385	20.7561	9.62376	9.79016	24.3527	43.1021	13.8184	9.7896	-0.511644	0.65144	-1.51283	0.0233721	Npas2	Promoter
chr1	39206869	39207260	34.5785	18.8692	10.3112	13.9123	63.6916	46.4176	8.57696	14.3965	-1.14325	0.170509	-2.27039	3.91329e-05	Npas2	Promoter
chr1	39256006	39256415	12.9669	28.3038	4.81188	8.75962	37.4657	48.0754	6.67097	15.5482	-1.58194	0.117329	-1.96192	0.00185187	Npas2	Promoter
chr1	39256530	39256829	19.4504	31.1342	21.3098	15.9734	55.2618	48.0754	14.7714	8.63788	-0.437641	0.587823	-2.12978	0.000129921	Npas2	Promoter
chr1	39281042	39281417	28.8154	25.4734	1.37482	10.3054	40.2756	55.5354	8.57696	4.03101	-2.17846	0.0291356	-2.90739	4.28556e-06	Intergenic	Intergenic
chr1	39281640	39282432	89.3277	121.706	5.49929	12.8818	171.405	121.017	12.8654	6.33444	-3.48241	1.96366e-11	-3.90303	1.76138e-20	Intergenic	Intergenic
chr1	39319350	39319492	2.88154	22.6431	5.49929	0	17.7962	14.92	3.33549	1.72758	-2.22561	0.475166	-2.67225	0.00941072	Intergenic	Intergenic
chr1	39367141	39369295	190.182	222.657	459.191	550.825	275.373	302.544	430.278	434.773	1.29536	1.40959e-10	0.580609	0.000159924	Intergenic,Rpl31	Intergenic,Promoter
chr1	39408622	39409075	7.20385	5.66076	50.8684	56.1646	1.87328	10.7755	43.3613	46.6445	3.04565	8.98368e-06	2.79971	0.000100263	Tbc1d8,Tbc1d8,Tbc1d8,Tbc1d8,Tbc1d8,Tbc1d8	Intron,Intron,Intron,Intron,Intron,Intron
chr1	39463886	39464126	3.60192	4.7173	13.7482	10.8207	2.80992	0	12.3889	9.7896	1.56814	0.216401	3.03537	0.0382797	Tbc1d8,Tbc1d8,Tbc1d8,Tbc1d8,Tbc1d8,Tbc1d8	Intron,Intron,Intron,Intron,Intron,Intron
chr1	39469081	39469305	5.76308	4.7173	30.9335	22.1567	3.74657	12.4333	18.1069	23.0343	2.32984	0.0119366	1.32877	0.133278	Tbc1d8,Tbc1d8,Tbc1d8,Tbc1d8,Tbc1d8,Tbc1d8	Intron,Intron,Intron,Intron,Intron,Intron
chr1	39481978	39482785	10.8058	11.3215	91.4257	67.5006	17.7962	22.3799	60.5152	69.103	2.84405	2.51929e-07	1.68493	0.000510576	Intergenic	Intergenic
chr1	39487437	39487767	20.1708	22.6431	6.1867	8.75962	49.642	45.5888	11.436	5.75859	-1.50808	0.106479	-2.45273	4.42865e-05	Intergenic	Intergenic
chr1	39493257	39493403	1.44077	3.77384	9.62376	21.1261	2.80992	1.65777	9.05346	13.2447	2.60379	0.0474004	2.32824	0.0679862	Intergenic	Intergenic
chr1	39499809	39499947	15.1281	3.77384	15.8105	15.4581	0.936641	1.65777	9.05346	13.2447	0.702257	0.529365	3.08542	0.0305371	Intergenic	Intergenic
chr1	39503091	39503568	23.7727	15.0954	52.9307	71.1075	22.4794	18.2355	60.0387	58.1617	1.6639	0.00360841	1.54136	0.00191852	Intergenic	Intergenic
chr1	39525827	39526136	4.32231	6.60422	52.2433	46.3744	9.36641	4.14443	36.2138	48.948	3.19459	1.32082e-05	2.67201	0.000123885	Intergenic	Intergenic
chr1	39530184	39530778	16.5688	29.2473	49.4936	103.57	36.529	34.8132	72.9042	55.8583	1.7591	0.00226707	0.8547	0.0598183	Intergenic	Intergenic
chr1	39535351	39536401	235.566	337.759	569.864	626.055	336.254	392.892	565.127	571.828	1.06673	1.82245e-07	0.63885	3.30788e-06	Intergenic,Cnot11	Intergenic,Promoter
chr1	39578263	39579539	111.66	87.7418	298.337	318.438	87.1076	81.2309	257.309	278.14	1.62324	8.86421e-11	1.67002	1.59924e-13	Rnf149,Rnf149,Intergenic	Promoter,Promoter,Intergenic
chr1	39580817	39581044	4.32231	2.83038	24.7468	19.065	6.55649	0	10.9595	14.3965	2.59452	0.0139676	1.96365	0.395779	Intergenic	Intergenic
chr1	39583237	39583514	7.92423	12.265	25.4342	36.5843	3.74657	0	42.4083	32.8239	1.63565	0.0428521	4.3973	1.19575e-05	Intergenic	Intergenic
chr1	39590269	39590567	7.92423	4.7173	32.9957	43.2828	3.74657	10.7755	50.5088	26.4895	2.57442	0.00112574	2.39137	0.00135358	Intergenic	Intergenic
chr1	39602330	39603631	22.3319	39.6253	292.837	346.778	29.0359	34.8132	349.273	321.329	3.39509	2.61709e-27	3.38819	5.71936e-39	Intergenic	Intergenic
chr1	39608565	39608885	5.76308	15.0954	23.372	37.0996	2.80992	3.31555	33.8314	27.0654	1.56402	0.0672864	3.31029	0.000185288	Intergenic	Intergenic
chr1	39614489	39615152	21.6115	19.8127	58.43	72.138	19.6695	19.0644	88.1521	40.886	1.65568	0.00206075	1.74069	0.00148123	Intergenic	Intergenic
chr1	39636028	39636573	7.20385	16.9823	66.6789	79.8671	3.74657	12.4333	59.0857	57.5859	2.6328	6.98747e-06	2.8259	4.67328e-06	Creg2,Creg2	Intron,Intron
chr1	39636686	39637001	10.0854	3.77384	23.372	24.733	1.87328	13.2622	30.0194	30.5205	1.76806	0.0632463	1.97529	0.0169298	Creg2,Creg2	Intron,Intron
chr1	39650288	39651437	51.8677	49.0599	85.239	111.814	47.7687	58.0221	117.218	115.748	0.966852	0.0209551	1.13624	0.000796124	Creg2,Creg2,D930019O06Rik,Creg2,Creg2,Creg2,Creg2,D930019O06Rik	Intron,Intron,Promoter,Promoter,Promoter,Exon,Exon,Promoter
chr1	39734037	39735200	77.8015	101.894	67.3663	79.3518	132.066	111.9	59.5622	61.6169	-0.285998	0.501784	-1.00869	0.00161587	Intergenic	Intergenic
chr1	39743760	39744274	44.6638	45.2861	10.3112	7.2138	42.1489	40.6154	15.7244	5.75859	-2.37186	0.000458033	-1.92836	0.00292066	Intergenic	Intergenic
chr1	39749756	39749998	11.5262	20.7561	6.87411	4.63744	29.9725	25.6955	5.24148	1.15172	-1.48985	0.174606	-3.08309	0.000352295	Intergenic	Intergenic
chr1	39761143	39762486	115.262	112.272	222.721	268.972	103.967	117.702	174.875	135.327	1.11289	2.86147e-05	0.485581	0.0911982	Intergenic	Intergenic
chr1	39781930	39782251	2.16115	0.94346	28.1839	37.6148	0.936641	0.828886	42.8848	32.8239	4.35572	7.53299e-05	5.42854	1.80727e-05	Intergenic	Intergenic
chr1	39784610	39785182	13.6873	13.2084	55.6803	67.5006	3.74657	3.31555	65.2802	55.2824	2.19578	0.000153421	4.0985	1.25959e-08	Intergenic	Intergenic
chr1	39841923	39842957	130.39	135.858	77.6775	105.115	266.006	284.308	104.83	92.7132	-0.537386	0.130539	-1.47643	3.4225e-12	Intergenic,1700066B17Rik,1700066B17Rik	Intergenic,Exon,Intron
chr1	39843119	39843770	45.3842	34.908	26.1216	11.336	102.094	88.6909	25.2544	23.6102	-1.11777	0.114275	-1.96268	5.37615e-07	1700066B17Rik	Intron
chr1	39846900	39847496	19.4504	13.2084	138.17	147.883	13.113	11.6044	135.325	143.389	3.11291	1.44039e-13	3.49832	6.24014e-17	1700066B17Rik,1700066B17Rik,1700066B17Rik,Intergenic	Intron,Promoter,Exon,Intergenic
chr1	39857236	39857369	7.92423	22.6431	1.37482	4.12217	14.9863	15.7488	1.90599	1.72758	-2.43308	0.05981	-3.07745	0.00500326	Gm35600	Promoter
chr1	39859361	39859511	3.60192	6.60422	18.5601	16.4887	1.87328	1.65777	10.9595	10.9413	1.7983	0.0993501	2.63589	0.0476096	Intergenic	Intergenic
chr1	39893126	39893751	15.8485	18.8692	61.1796	83.9893	11.2397	20.7222	60.0387	57.01	2.07283	0.000107448	1.86254	0.000486515	Intergenic	Intergenic
chr1	39895089	39895990	50.4269	34.908	127.171	145.307	59.0084	56.3643	113.883	143.389	1.66584	1.06446e-05	1.1559	0.000419191	Intergenic	Intergenic
chr1	39896383	39897093	45.3842	40.5688	98.9872	111.814	56.1985	53.0487	98.1586	100.199	1.29255	0.00140091	0.861105	0.0155914	Intergenic	Intergenic
chr1	39904729	39905085	6.48346	14.1519	16.4979	17.004	54.3252	37.2999	17.1539	19.0033	0.715906	0.483379	-1.34027	0.0146466	Map4k4	Promoter
chr1	39911470	39911814	7.92423	4.7173	32.9957	32.9774	30.9092	18.2355	21.4424	28.7929	2.36377	0.00435565	0.0339734	0.963917	Map4k4	Promoter
chr1	39913304	39913617	27.3746	16.9823	19.2475	32.9774	44.0221	36.471	19.0599	12.093	0.233868	0.775064	-1.3606	0.0213697	Map4k4	Promoter
chr1	39916228	39916467	6.48346	2.83038	20.6223	20.6109	4.68321	2.48666	22.3954	25.9136	2.11831	0.0433317	2.76652	0.00262966	Map4k4	Promoter
chr1	39917416	39919098	141.195	165.106	109.986	107.692	325.951	303.372	118.648	105.958	-0.490791	0.125675	-1.48384	5.23744e-14	Map4k4	Promoter
chr1	39922129	39922316	12.9669	18.8692	14.4356	13.9123	35.5924	21.551	6.19447	13.2447	-0.161466	0.872122	-1.56462	0.0355228	Map4k4	Promoter
chr1	39923378	39923956	61.2327	62.2684	59.1174	51.5272	93.6641	135.108	43.8378	40.3101	-0.160398	0.749569	-1.44408	5.71145e-05	Map4k4	Promoter
chr1	39934956	39935261	31.6969	49.0599	10.9986	4.63744	41.2122	46.4176	9.05346	9.21374	-2.39041	0.00175979	-2.26346	0.000129987	Map4k4	Promoter
chr1	39936204	39936968	69.8773	64.1553	179.414	241.147	155.482	154.173	204.894	178.516	1.6499	8.72189e-08	0.309654	0.205074	Map4k4	Promoter
chr1	39947749	39947976	5.04269	2.83038	24.0594	21.6414	3.74657	5.80221	5.71798	13.2447	2.5129	0.0140967	0.976361	0.424798	Map4k4	Promoter
chr1	39949091	39949528	18.73	20.7561	32.3083	24.2178	49.642	50.5621	22.3954	22.4585	0.516077	0.493843	-1.15984	0.0211645	Map4k4	Promoter
chr1	39949950	39950388	10.0854	14.1519	41.2447	31.9468	36.529	50.5621	23.3484	21.8826	1.60205	0.0286148	-0.946984	0.0814304	Map4k4	Promoter
chr1	39956709	39956948	16.5688	16.9823	3.43706	12.3665	35.5924	22.3799	5.24148	1.72758	-1.06461	0.329917	-3.02374	0.000298335	Map4k4	Promoter
chr1	39960560	39961609	30.2562	22.6431	91.4257	101.508	44.9588	31.4977	56.7033	45.4928	1.85854	3.39299e-05	0.424553	0.402241	Map4k4	Promoter
chr1	39969026	39969377	14.4077	19.8127	85.9264	98.9321	10.3031	30.6688	47.1733	52.979	2.44729	4.58945e-07	1.27619	0.0321223	Intergenic	Intergenic
chr1	39976995	39977177	14.4077	12.265	2.74965	6.69853	19.6695	17.4066	4.28848	6.33444	-1.47916	0.22373	-1.81064	0.0408226	Intergenic	Intergenic
chr1	40002202	40002336	18.73	18.8692	2.74965	5.15272	14.9863	11.6044	7.62397	3.45515	-2.23027	0.037351	-1.24819	0.223254	Intergenic	Intergenic
chr1	40022371	40023387	64.8346	92.4591	143.669	185.498	92.7275	120.189	184.881	143.965	1.07497	0.00179316	0.626228	0.0297273	Intergenic	Intergenic
chr1	40046657	40046958	7.20385	10.3781	37.8076	38.6454	19.6695	13.2622	31.9254	23.0343	2.13404	0.00414175	0.746837	0.282757	Intergenic	Intergenic
chr1	40052006	40052426	31.6969	23.5865	4.81188	11.336	59.945	56.3643	12.8654	12.6689	-1.75837	0.0442767	-2.18664	1.65121e-05	Intergenic	Intergenic
chr1	40052970	40053156	28.8154	22.6431	2.74965	8.24435	19.6695	22.3799	10.9595	6.9103	-2.1994	0.0201186	-1.22802	0.124596	Intergenic	Intergenic
chr1	40053679	40054570	100.133	96.233	17.8727	21.1261	144.243	165.777	18.1069	14.3965	-2.32689	1.68658e-07	-3.24718	2.32692e-20	Intergenic	Intergenic
chr1	40055810	40056340	85.0054	85.8549	35.058	36.069	73.9947	107.755	45.7438	41.4618	-1.26357	0.00407558	-1.06086	0.0068143	Intergenic	Intergenic
chr1	40059135	40060059	79.9627	84.9114	40.5573	44.3134	130.193	143.397	54.3208	62.7686	-0.955407	0.0306438	-1.22743	5.86321e-05	Intergenic	Intergenic
chr1	40064551	40065253	20.1708	21.6996	117.547	115.936	16.8595	17.4066	76.7162	93.2891	2.48218	5.19049e-09	2.30877	3.95937e-07	Intergenic	Intergenic
chr1	40081010	40081431	7.20385	6.60422	68.7411	83.9893	6.55649	3.31555	48.6028	55.8583	3.46428	9.93712e-09	3.42128	6.53853e-07	Gm16894	Intron
chr1	40084453	40084956	18.73	12.265	56.3677	98.4169	0	17.4066	56.2268	90.4098	2.3101	3.87713e-05	3.07118	0.273203	Gm16894,Il1r2,Gm16894	Intron,Promoter,Promoter
chr1	40087360	40087842	27.3746	17.9257	52.9307	54.1035	26.226	21.551	75.2867	53.5549	1.22997	0.0354268	1.43665	0.00310397	Il1r2	Promoter
chr1	40091216	40091493	2.88154	10.3781	30.2461	21.6414	0	3.31555	50.5088	31.0964	2.00217	0.0378519	4.55774	5.53849e-06	Il1r2	Promoter
chr1	40092548	40092783	4.32231	8.49114	28.1839	22.6719	4.68321	3.31555	14.2949	20.1551	2.00948	0.0303532	2.11125	0.0348143	Il1r2	Promoter
chr1	40116477	40116753	17.2892	16.9823	37.8076	78.3213	22.4794	20.7222	44.3143	38.5825	1.76586	0.00482702	0.942595	0.0920504	Il1r2	Promoter
chr1	40224691	40225288	23.0523	28.3038	70.116	91.7183	17.7962	19.0644	54.7973	68.5272	1.66454	0.000634308	1.73947	0.000515862	Intergenic,Il1r1,Il1r1,Il1r1	Intergenic,Promoter,Promoter,Promoter
chr1	40227399	40227561	7.92423	8.49114	0.687411	3.09163	19.6695	15.7488	0.952996	0.575859	-2.07953	0.20922	-4.50899	0.000399067	Il1r1	Promoter
chr1	40228036	40228225	13.6873	15.0954	0	0.515272	29.9725	15.7488	0	1.15172	-5.61799	0.00445425	-5.41949	8.86937e-05	Il1r1	Promoter
chr1	40230219	40230853	23.7727	8.49114	98.9872	123.15	9.36641	14.0911	117.218	68.5272	2.7497	4.62893e-08	2.97875	5.27359e-09	Il1r1	Promoter
chr1	40235635	40235825	20.1708	17.9257	4.12447	6.69853	17.7962	20.7222	2.85899	5.75859	-1.80368	0.0773918	-2.17752	0.0166972	Il1r1	Promoter
chr1	40236017	40236585	89.3277	81.1376	5.49929	3.6069	160.166	143.397	15.7244	9.21374	-4.25383	1.61042e-12	-3.58691	2.81999e-21	Il1r1	Promoter
chr1	40239629	40239827	10.8058	4.7173	31.6209	20.6109	2.80992	0.828886	19.5364	17.2758	1.72328	0.059692	3.37103	0.00388535	Il1r1	Promoter
chr1	40240425	40241020	10.0854	6.60422	116.173	98.4169	5.61985	4.14443	82.9106	102.503	3.65974	3.5311e-12	4.25582	1.42515e-12	Il1r1	Promoter
chr1	40265957	40266161	5.76308	3.77384	12.3734	21.1261	2.80992	1.65777	14.7714	21.3068	1.80417	0.110162	3.02483	0.00656907	Il1r1,Il1r1	Promoter,Promoter
chr1	40268297	40268972	141.916	115.102	8.93635	11.336	145.179	145.055	10.9595	9.21374	-3.65403	6.85219e-16	-3.83994	5.20106e-23	Il1r1	Promoter
chr1	40271035	40271500	42.5027	33.0211	1.37482	18.0345	44.0221	43.931	13.8184	9.7896	-1.94979	0.250565	-1.89028	0.00107572	Il1r1	Promoter
chr1	40290534	40290811	19.4504	16.0388	15.8105	22.1567	33.7191	47.2465	20.9659	11.5172	0.0985704	0.915072	-1.3111	0.0305555	Il1r1	Promoter
chr1	40294465	40295519	28.8154	10.3781	295.587	356.568	9.36641	14.0911	272.08	257.409	4.03932	3.02862e-09	4.48314	9.61218e-35	Il1r1	Promoter
chr1	40315339	40315866	92.2092	74.5334	13.7482	4.63744	144.243	121.846	7.62397	2.87929	-3.22353	2.77074e-08	-4.62194	4.02398e-22	Intergenic	Intergenic
chr1	40321716	40322231	12.9669	14.1519	58.43	69.0464	3.74657	2.48666	69.0922	48.948	2.23771	8.94094e-05	4.25844	2.20395e-08	Intergenic	Intergenic
chr1	40354843	40354942	4.32231	5.66076	8.24894	15.4581	0.936641	0	11.9124	8.06202	1.26168	0.320107	4.49662	0.02355	Intergenic	Intergenic
chr1	40355356	40355832	11.5262	15.0954	54.3055	60.2868	9.36641	11.6044	53.8443	47.2204	2.11658	0.000406705	2.26524	0.000110365	Intergenic	Intergenic
chr1	40355926	40356403	27.3746	12.265	67.3663	68.0158	8.42977	11.6044	60.5152	55.2824	1.75064	0.00209414	2.52453	8.15777e-06	Intergenic	Intergenic
chr1	40382504	40383417	71.3181	58.4946	24.0594	40.1912	147.989	163.291	40.0258	36.855	-1.00792	0.0588476	-2.01645	2.96755e-11	Intergenic	Intergenic
chr1	40385942	40386705	72.7588	73.5899	20.6223	29.8858	226.667	203.906	46.2203	31.6722	-1.52593	0.00223748	-2.45743	2.15522e-18	Intergenic	Intergenic
chr1	40392496	40392950	6.48346	19.8127	58.43	40.1912	13.113	16.5777	57.6562	43.1894	1.93372	0.0065245	1.762	0.00168666	Intergenic	Intergenic
chr1	40404427	40405074	7.20385	12.265	103.112	128.818	5.61985	14.0911	79.0987	82.3478	3.605	1.20387e-12	3.013	1.33922e-08	Intergenic,Il1rl1	Intergenic,Promoter
chr1	40405230	40405469	3.60192	7.54768	26.809	22.1567	2.80992	3.31555	22.8719	23.6102	2.15914	0.0247032	2.91927	0.00216018	Il1rl1	Promoter
chr1	40412570	40412701	2.16115	2.83038	19.9349	18.5498	3.74657	4.97332	13.3419	9.21374	2.95926	0.0115197	1.36949	0.225842	Il1rl1	Promoter
chr1	40412920	40413408	25.9338	27.3604	85.239	71.1075	31.8458	46.4176	56.2268	53.5549	1.55245	0.00132016	0.484374	0.318683	Il1rl1	Promoter
chr1	40465473	40466006	33.8581	48.1165	17.8727	30.9163	132.066	108.584	40.9788	39.7342	-0.734922	0.267337	-1.5741	3.32299e-06	Il18r1,Il18r1,Il18r1,Il18r1,Il18r1,Il18r1,Intergenic	Promoter,Promoter,Promoter,Promoter,Promoter,Promoter,Intergenic
chr1	40475426	40476242	52.5881	33.0211	48.1188	61.8326	67.4382	85.3753	37.1668	31.0964	0.355768	0.524558	-1.16173	0.00560777	Il18r1	Promoter
chr1	40481767	40482030	10.0854	6.60422	2.06223	2.57636	19.6695	36.471	6.67097	2.87929	-1.84603	0.235907	-2.53954	0.00179665	Il18r1	Promoter
chr1	40515044	40515790	65.555	73.5899	50.181	49.9813	114.27	141.74	46.2203	35.1274	-0.472488	0.313144	-1.65078	1.20043e-06	Intergenic,Il18rap,Il18rap,Il18rap	Intergenic,Promoter,Promoter,Promoter
chr1	40516085	40516786	95.0908	80.1941	31.6209	55.1341	232.287	207.222	49.5558	44.917	-1.00734	0.0320432	-2.21488	9.71007e-18	Il18rap,Il18rap,Il18rap	Promoter,Promoter,Promoter
chr1	40541031	40541136	1.44077	0.94346	11.686	12.3665	5.61985	4.97332	17.6304	12.6689	3.31259	0.0357693	1.52103	0.124514	Intergenic	Intergenic
chr1	40586872	40587288	49.7065	34.908	29.5587	20.0956	73.9947	72.942	31.4489	26.4895	-0.780619	0.222239	-1.33963	0.00161424	Gm35801	Promoter
chr1	40600369	40600929	2.88154	6.60422	61.867	58.741	6.55649	15.7488	37.1668	44.917	3.71424	2.26416e-07	1.8641	0.00427726	Gm35801	Promoter
chr1	40687689	40688172	10.8058	10.3781	15.8105	9.27489	42.1489	71.2842	9.05346	17.8516	0.235846	0.836403	-2.09151	0.00022224	Slc9a2	Promoter
chr1	40750853	40751136	33.8581	55.6642	4.12447	1.03054	23.416	33.9843	10.0065	1.15172	-4.18619	1.6631e-06	-2.33465	0.00804878	Intergenic	Intergenic
chr1	40845257	40845685	54.0288	64.1553	9.62376	26.7941	69.3115	70.4554	25.2544	20.7309	-1.67675	0.00777487	-1.60025	0.000318762	Intergenic	Intergenic
chr1	40852076	40852308	5.04269	6.60422	2.74965	4.12217	19.6695	28.1821	8.57696	6.33444	-0.74898	0.659175	-1.67897	0.030764	Intergenic	Intergenic
chr1	40875052	40875413	27.3746	23.5865	24.0594	31.9468	13.113	18.2355	30.0194	51.8273	0.137361	0.856333	1.37588	0.02718	Intergenic	Intergenic
chr1	42745182	42745353	4.32231	6.60422	19.9349	18.5498	4.68321	0.828886	10.483	20.1551	1.82984	0.0774104	2.50154	0.032951	Intergenic	Intergenic
chr1	42768771	42769391	11.5262	24.53	68.7411	85.0198	3.74657	4.14443	81.9576	61.6169	2.11765	0.000111029	4.1838	5.72651e-10	Intergenic	Intergenic
chr1	42850692	42852164	311.206	344.363	692.911	784.243	445.841	443.454	718.559	729.037	1.17486	1.59457e-12	0.702857	1.15356e-09	Intergenic,Mrps9,Mrps9	Intergenic,Promoter,Promoter
chr1	42866038	42866307	8.64462	4.7173	17.1853	35.0385	2.80992	4.14443	25.2544	29.9446	1.95383	0.0381	2.97751	0.000750277	Mrps9	Promoter
chr1	42952678	42953751	67.7162	43.3992	51.5559	36.069	115.207	106.926	41.4553	33.9757	-0.353967	0.527555	-1.55416	1.01997e-05	Gm39633,Gpr45,Intergenic	Promoter,Promoter,Intergenic
chr1	43091436	43093297	178.655	133.028	389.075	487.962	206.998	214.682	432.184	443.411	1.48805	1.14657e-10	1.05334	2.51639e-11	Tgfbrap1,Tgfbrap1,Tgfbrap1,Tgfbrap1,Tgfbrap1,Tgfbrap1,Tgfbrap1,LOC108167597,Tgfbrap1,Tgfbrap1,Tgfbrap1,Tgfbrap1,Tgfbrap1,Tgfbrap1,Tgfbrap1,Tgfbrap1,Tgfbrap1,Tgfbrap1	Intron,Intron,Intron,Intron,Intron,Intron,Intron,Promoter,Promoter,Promoter,Promoter,Promoter,Promoter,Exon,Exon,Exon,Exon,Exon
chr1	43097903	43099398	267.983	288.699	664.039	778.06	334.381	372.17	737.142	613.865	1.37592	1.21641e-15	0.935189	1.36638e-11	Tgfbrap1,Tgfbrap1,Tgfbrap1,Tgfbrap1,AI597479,Tgfbrap1,Tgfbrap1,Intergenic	Intron,Intron,Promoter,Promoter,Promoter,Exon,Exon,Intergenic
chr1	43110624	43111033	12.2465	20.7561	36.4328	37.6148	16.8595	21.551	53.8443	44.917	1.17946	0.0945497	1.36	0.0115931	Intergenic	Intergenic
chr1	43127763	43128173	62.6735	50.0034	19.9349	17.5192	79.6145	67.9687	23.3484	17.2758	-1.5951	0.00490906	-1.85409	3.61645e-05	Fhl2,Fhl2,Fhl2	Intron,Intron,Intron
chr1	43139452	43140084	33.1377	40.5688	74.2404	122.119	98.3473	75.4287	66.2332	85.2271	1.42277	0.0019494	-0.198466	0.617985	Fhl2,Fhl2,Fhl2	Intron,Intron,Intron
chr1	43143352	43144094	133.992	130.198	21.9972	27.3094	83.3611	88.6909	26.6839	19.0033	-2.41469	4.51472e-10	-1.90672	5.1626e-06	Fhl2,Fhl2,Fhl2	Intron,Intron,Intron
chr1	43144344	43144938	133.992	115.102	40.5573	45.3439	61.8183	72.1131	55.2738	83.4995	-1.53512	3.81425e-05	0.0461122	0.921848	Fhl2,Fhl2,Fhl2	Intron,Intron,Intron
chr1	43168603	43169309	90.7685	96.233	32.9957	26.7941	92.7275	75.4287	41.9318	20.7309	-1.64969	0.00014823	-1.41364	0.00176779	Fhl2,Fhl2	Intron,Intron
chr1	43182943	43183395	33.8581	33.0211	14.4356	13.9123	50.5786	90.3486	14.2949	21.8826	-1.23951	0.084068	-1.97271	8.6336e-05	Fhl2,Fhl2	Intron,Intron
chr1	43218859	43219304	43.2231	26.4169	6.87411	6.18326	45.8954	62.1665	10.483	8.63788	-2.42406	0.00220077	-2.49571	6.47984e-06	Intergenic	Intergenic
chr1	43224987	43225251	5.04269	13.2084	9.62376	3.09163	48.7054	47.2465	6.67097	9.21374	-0.524894	0.7144	-2.60327	9.28406e-06	Intergenic	Intergenic
chr1	43225494	43226019	25.9338	16.0388	14.4356	11.336	74.9313	43.1021	20.0129	10.3655	-0.715044	0.423839	-1.94365	0.000454928	Intergenic	Intergenic
chr1	43257898	43258279	46.1046	84.9114	2.74965	4.63744	22.4794	45.5888	7.62397	5.75859	-4.11433	5.96862e-09	-2.34452	0.00109835	Gm29040,Gm29040,Gm29040	Intron,Intron,Intron
chr1	43260516	43260745	30.9765	22.6431	5.49929	8.24435	12.1763	15.7488	6.19447	5.18273	-1.95604	0.0247394	-1.29444	0.183653	Gm29040,Gm29040,Gm29040,Gm29040,Gm29040,Gm29040,Gm29040,Gm29040,Gm29040	Intron,Intron,Intron,Exon,Exon,Exon,Intron,Intron,Intron
chr1	43264484	43264706	9.365	12.265	32.9957	40.1912	17.7962	15.7488	18.1069	16.6999	1.7692	0.0164157	0.0555848	0.947922	Gm29040,Gm29040,Gm29040	Intron,Intron,Intron
chr1	43299436	43299755	20.8912	53.7772	11.686	13.9123	38.4023	43.931	13.3419	7.48616	-1.53119	0.0469393	-1.97216	0.00135984	Gm29040	Intron
chr1	43358222	43358515	6.48346	6.60422	32.9957	42.7675	4.68321	9.94664	7.14747	12.6689	2.53639	0.00113923	0.423459	0.715352	Intergenic	Intergenic
chr1	43412966	43413151	16.5688	12.265	4.12447	4.63744	26.226	20.7222	5.71798	7.48616	-1.71906	0.139184	-1.83399	0.0199766	Intergenic	Intergenic
chr1	43431114	43431765	38.9008	33.0211	16.4979	24.733	108.65	135.937	20.4894	22.4585	-0.797663	0.24411	-2.51341	8.20731e-12	Intergenic	Intergenic
chr1	43442249	43442358	2.88154	3.77384	0.687411	1.54581	11.2397	13.2622	1.42949	3.45515	-1.55072	0.521009	-2.34979	0.0418715	Intergenic	Intergenic
chr1	43442466	43442910	15.1281	8.49114	24.0594	14.9429	41.2122	49.7332	20.0129	16.124	0.706126	0.459235	-1.32937	0.0143796	Intergenic	Intergenic
chr1	43461588	43462104	43.9435	51.8903	68.7411	63.8937	18.7328	38.1288	90.0581	67.3755	0.471326	0.33055	1.46166	0.00199689	Nck2	Promoter
chr1	43462560	43463294	31.6969	31.1342	118.922	133.971	37.4657	37.2999	104.83	91.5615	2.00946	2.59285e-07	1.39437	0.000240625	Nck2	Promoter
chr1	43465956	43466286	12.2465	12.265	51.5559	74.1991	14.9863	11.6044	49.5558	39.1584	2.36228	6.91501e-05	1.74453	0.00329232	Nck2	Promoter
chr1	43467626	43467967	29.5358	40.5688	17.8727	20.6109	59.945	62.1665	35.7373	20.1551	-0.857954	0.214554	-1.12001	0.0219993	Nck2	Promoter
chr1	43473990	43475240	90.7685	85.8549	263.966	312.77	186.392	128.477	304.482	257.409	1.70712	3.28266e-11	0.840619	0.000256924	Nck2	Promoter
chr1	43536941	43537425	91.4888	72.6465	4.81188	8.24435	101.157	96.1508	23.8249	31.6722	-3.62745	2.2672e-10	-1.83512	1.98924e-06	Intergenic	Intergenic
chr1	43537598	43538176	57.6308	74.5334	17.8727	6.69853	80.5512	72.1131	18.1069	16.124	-2.45275	6.27468e-05	-2.15356	1.23631e-06	Intergenic	Intergenic
chr1	43538687	43539254	66.2754	62.2684	18.5601	20.6109	118.953	101.953	25.7309	33.3998	-1.71236	0.00118014	-1.90553	2.34095e-07	Intergenic	Intergenic
chr1	43539459	43540498	208.912	149.067	38.495	34.5232	365.29	352.277	61.9447	61.6169	-2.30007	2.62581e-11	-2.53749	4.06062e-36	Intergenic	Intergenic
chr1	43542271	43543073	64.1142	61.3249	23.372	30.9163	101.157	124.333	40.5023	34.5515	-1.20286	0.0218141	-1.58576	7.51145e-06	Intergenic	Intergenic
chr1	43544462	43545010	38.1804	48.1165	31.6209	35.5537	117.08	116.044	23.8249	33.9757	-0.355746	0.553833	-2.01905	2.97881e-08	Intergenic	Intergenic
chr1	43558452	43558737	16.5688	15.0954	2.74965	13.3971	33.7191	29.8399	3.81198	13.8206	-0.950314	0.407807	-1.86935	0.013402	Intergenic	Intergenic
chr1	43562378	43562754	22.3319	22.6431	15.8105	19.065	51.5153	48.0754	16.6774	17.2758	-0.363539	0.661989	-1.55258	0.00286496	Intergenic	Intergenic
chr1	43600209	43600568	38.1804	54.7207	3.43706	7.2138	24.3527	19.8933	5.24148	2.87929	-3.09114	2.68986e-05	-2.42925	0.00505592	Intergenic	Intergenic
chr1	43615905	43616317	4.32231	9.4346	41.9321	44.8286	5.61985	3.31555	21.4424	13.8206	2.68966	0.000350217	1.99403	0.0425449	Intergenic	Intergenic
chr1	43766121	43766767	146.958	128.311	48.8062	69.0464	251.957	279.335	64.8037	84.0754	-1.21875	0.00078536	-1.84093	2.91178e-15	Uxs1,Uxs1,Uxs1	Intron,Intron,Intron
chr1	43767668	43768321	88.6073	71.703	22.6846	23.7025	158.292	159.146	27.1604	30.5205	-1.79043	0.000173557	-2.4633	3.43196e-15	Uxs1,Uxs1,Uxs1	Intron,Intron,Intron
chr1	43768437	43769013	72.7588	60.3815	28.8713	40.7065	142.369	140.911	40.5023	55.2824	-0.932366	0.0669631	-1.56956	7.06653e-07	Uxs1,Uxs1,Uxs1	Intron,Intron,Intron
chr1	43810711	43811756	20.8912	12.265	96.2376	102.539	16.8595	9.11775	106.259	86.3788	2.5636	9.9664e-08	2.90587	1.03041e-09	Uxs1,Uxs1	Intron,Intron
chr1	43811864	43812082	4.32231	2.83038	17.1853	18.5498	3.74657	4.14443	21.4424	24.1861	2.30509	0.0420078	2.52841	0.00537838	Uxs1,Uxs1	Intron,Intron
chr1	43819114	43819540	48.9862	76.4203	24.7468	32.9774	76.8046	53.8776	20.9659	22.4585	-1.10841	0.042135	-1.58816	0.000734033	Uxs1,Uxs1	Intron,Intron
chr1	43895797	43896209	13.6873	8.49114	41.2447	46.8897	1.87328	5.80221	19.0599	31.0964	1.97588	0.00410242	2.68168	0.00367294	Intergenic	Intergenic
chr1	43912343	43912645	0.720385	4.7173	28.8713	26.7941	4.68321	0	19.0599	13.2447	3.43453	0.00130281	2.83554	0.0200483	Intergenic	Intergenic
chr1	43912767	43912913	3.60192	1.88692	10.3112	17.004	0.936641	0	14.7714	10.3655	2.29564	0.0820022	4.8295	0.0115447	Intergenic	Intergenic
chr1	43913377	43913476	1.44077	0.94346	9.62376	13.3971	1.87328	1.65777	7.14747	10.3655	3.25217	0.0427038	2.31012	0.104605	Intergenic	Intergenic
chr1	43914314	43914922	8.64462	19.8127	102.424	99.4474	10.3031	10.7755	75.7632	68.5272	2.85998	1.86324e-08	2.7747	1.01758e-07	Intergenic	Intergenic
chr1	43916932	43917200	5.76308	9.4346	31.6209	36.069	2.80992	0.828886	30.4959	37.4308	2.17432	0.00676435	4.25801	2.47459e-05	Intergenic	Intergenic
chr1	43933109	43934716	418.543	517.016	1264.84	1311.88	694.988	684.66	1262.24	1035.39	1.46542	8.0856e-24	0.73725	3.45071e-11	Intergenic,Tpp2,Tpp2	Intergenic,Promoter,Promoter
chr1	43997265	43997736	20.8912	18.8692	6.1867	9.79016	91.7909	76.2576	15.7244	11.5172	-1.30629	0.172739	-2.61573	6.22492e-09	Intergenic	Intergenic
chr1	44014863	44015573	92.2092	111.328	11.686	10.3054	69.3115	79.5731	8.57696	13.2447	-3.21413	2.09342e-11	-2.78321	1.10204e-08	Mettl21c,Mettl21c,Mettl21c	Intron,Intron,Intron
chr1	44032291	44032512	12.2465	8.49114	8.93635	13.9123	29.0359	32.3266	12.8654	8.06202	0.139199	0.907331	-1.54432	0.0231655	Mettl21c	Intron
chr1	44033028	44033256	10.0854	6.60422	6.87411	6.18326	19.6695	18.2355	3.81198	6.9103	-0.362981	0.793127	-1.83354	0.03842	Mettl21c	Intron
chr1	44041819	44042686	41.0619	58.4946	127.171	119.028	135.813	80.402	108.642	62.7686	1.3145	0.000642508	-0.32778	0.431001	Mettl21c,Mettl21c,Mettl21c,Intergenic	Intron,Promoter,Exon,Intergenic
chr1	44099675	44100130	41.0619	32.0777	15.1231	11.336	69.3115	86.2042	12.8654	13.8206	-1.47705	0.0373044	-2.54622	3.03582e-08	Tex30,Tex30,Tex30,Tex30,Tex30,Tex30,Tex30,Tex30,Tex30	Intron,Intron,Intron,Exon,Exon,Exon,Intron,Intron,Intron
chr1	44101516	44102870	254.296	300.964	617.295	723.441	472.067	542.921	563.697	529.214	1.27611	1.68651e-12	0.105884	0.469502	Tex30,Tex30,Tex30,Tex30,Tex30,Tex30,Tex30,Tex30,Tex30,Tex30,Tex30,Tex30,Tex30,Tex30,Tex30,Tex30,Intergenic	Intron,Intron,Promoter,Exon,Promoter,Promoter,Intron,Exon,Exon,Exon,Intron,Intron,Intron,Exon,Exon,Exon,Intergenic
chr1	44118244	44120332	269.424	322.663	639.98	639.967	550.745	528.001	528.436	521.728	1.11567	1.90122e-10	-0.0381153	0.793988	Kdelc1,Kdelc1,Kdelc1,Kdelc1,Bivm,Bivm,Kdelc1,Kdelc1,Bivm,Intergenic,Bivm	Intron,Intron,Promoter,Promoter,Promoter,Promoter,Exon,Exon,Promoter,Intergenic,Promoter
chr1	44122200	44122643	31.6969	33.0211	25.4342	41.737	85.2344	88.6909	37.1668	19.5792	0.0609328	0.931854	-1.60645	0.000231056	Bivm	Promoter
chr1	44125661	44125900	5.04269	7.54768	31.6209	18.0345	1.87328	2.48666	9.05346	26.4895	1.98814	0.0356676	3.01423	0.0100606	Bivm	Promoter
chr1	44147185	44148609	239.168	261.339	510.747	588.955	430.855	361.395	502.705	445.715	1.1386	1.01182e-09	0.262442	0.0973133	Ercc5,Ercc5	Promoter,Promoter
chr1	44173200	44173452	37.46	16.0388	1.37482	4.12217	8.42977	7.45998	3.81198	4.60687	-3.24751	0.00173199	-0.918362	0.460959	Intergenic	Intergenic
chr1	44551481	44552780	41.0619	39.6253	142.982	164.372	28.0992	37.2999	94.3466	65.6479	1.92959	4.18393e-08	1.28924	0.00337518	Gm39635,Gm39635,Gulp1,Gulp1,Gulp1,Intergenic	Promoter,Promoter,Promoter,Promoter,Promoter,Intergenic
chr1	44584849	44585514	7.20385	9.4346	98.2998	123.665	10.3031	9.11775	48.6028	45.4928	3.75517	8.52019e-13	2.27961	0.000168796	Gulp1	Promoter
chr1	44591787	44592161	2.88154	1.88692	35.058	33.4927	1.87328	0.828886	18.5834	16.6999	3.82001	8.59208e-05	3.73177	0.00319882	Gulp1	Promoter
chr1	45794833	45796350	338.581	363.232	873.7	866.687	571.351	431.85	918.688	766.468	1.31166	3.83815e-18	0.749406	0.0035055	Intergenic,Wdr75,Wdr75,Wdr75	Intergenic,Promoter,Promoter,Promoter
chr1	45826251	45826489	0	1.88692	27.4965	21.1261	2.80992	2.48666	23.3484	21.8826	4.8394	0.000807836	3.09795	0.00179879	Gm30900,Gm30900	Exon,Intron
chr1	45826796	45827270	6.48346	1.88692	65.3041	74.7144	2.80992	2.48666	59.0857	43.7653	3.99976	1.29975e-08	4.28517	1.58513e-07	Gm30900	Intron
chr1	45868555	45869099	15.1281	14.1519	50.181	63.3784	9.36641	4.97332	40.0258	43.7653	1.9554	0.00099596	2.56022	0.000159204	Intergenic	Intergenic
chr1	45880851	45881992	19.4504	23.5865	204.849	227.75	11.2397	14.0911	170.11	173.333	3.34013	1.90902e-21	3.75426	1.25268e-21	Intergenic	Intergenic
chr1	45925492	45926245	23.7727	25.4734	109.298	94.2947	42.1489	33.9843	71.9512	93.2891	2.04865	3.06626e-06	1.11897	0.0070972	Slc40a1,Slc40a1,Slc40a1,Slc40a1,Slc40a1,Slc40a1	Promoter,Exon,Intron,Intron,Promoter,Promoter
chr1	46831948	46832257	4.32231	7.54768	48.8062	50.4966	0.936641	0.828886	38.5963	60.4652	3.09196	1.91814e-05	5.81253	2.4112e-06	Slc39a10,Slc39a10,Slc39a10,Slc39a10,Slc39a10	Intron,Intron,Intron,Intron,Intron
chr1	46843457	46843770	28.8154	34.908	6.1867	6.18326	37.4657	42.2732	4.76498	6.33444	-2.36274	0.00348888	-2.85419	1.57757e-05	Slc39a10,Slc39a10,Slc39a10,Slc39a10,Slc39a10,Slc39a10	Intron,Intron,Intron,Intron,Exon,Promoter
chr1	46852266	46854922	852.215	805.715	1827.83	2009.56	1345.02	1301.35	1815.93	1716.06	1.21044	5.94252e-24	0.417285	1.31141e-07	Slc39a10,Slc39a10,Slc39a10,Slc39a10,Slc39a10,Slc39a10,Slc39a10,Slc39a10	Intron,Intron,Intron,Intron,Promoter,Promoter,Exon,Exon
chr1	46863493	46865005	339.301	351.911	97.6124	119.543	582.591	571.932	133.419	145.692	-1.66544	8.35986e-13	-2.05027	3.15442e-43	Slc39a10,Slc39a10	Intron,Intron
chr1	46872171	46872461	26.6542	31.1342	2.74965	6.69853	35.5924	45.5888	3.81198	7.48616	-2.58104	0.00406693	-2.86566	2.09131e-05	Slc39a10,Slc39a10	Intron,Intron
chr1	46872618	46872802	15.8485	11.3215	6.1867	3.09163	16.8595	23.2088	3.81198	1.72758	-1.57149	0.19104	-2.83446	0.00301122	Slc39a10,Slc39a10	Intron,Intron
chr1	46873482	46874263	53.3085	45.2861	134.045	156.127	57.1351	54.7065	97.2056	124.961	1.55419	1.12352e-05	0.988823	0.00473855	Slc39a10,Slc39a10	Intron,Intron
chr1	46884710	46884854	16.5688	25.4734	0.687411	3.09163	6.55649	4.97332	1.42949	2.30343	-3.41161	0.00350694	-1.63504	0.283815	Slc39a10,Slc39a10	Intron,Intron
chr1	46894503	46894796	11.5262	11.3215	31.6209	37.6148	44.9588	29.011	35.7373	27.0654	1.60071	0.0312588	-0.229061	0.704905	Slc39a10	Intron
chr1	46905798	46906019	3.60192	7.54768	26.1216	25.2483	7.49313	4.97332	24.7779	18.4275	2.23047	0.0177974	1.80301	0.0363824	Slc39a10	Intron
chr1	46914376	46914682	13.6873	4.7173	26.809	30.401	4.68321	14.0911	26.6839	38.5825	1.61023	0.0652448	1.77873	0.0168402	Slc39a10	Intron
chr1	46916014	46916233	10.0854	7.54768	4.12447	7.72907	30.9092	22.3799	4.76498	1.72758	-0.566672	0.680702	-3.0066	0.000444703	Slc39a10	Intron
chr1	46921519	46921931	7.20385	2.83038	59.1174	74.7144	4.68321	16.5777	71.4747	61.041	3.69072	7.28672e-08	2.61793	6.4694e-06	Slc39a10	Intron
chr1	46927086	46927441	2.16115	10.3781	30.2461	28.8552	3.74657	5.80221	14.2949	25.3378	2.28225	0.0149876	2.04081	0.0303969	Intergenic	Intergenic
chr1	50770323	50770608	2.88154	1.88692	21.3098	40.7065	0.936641	0	6.19447	13.2447	3.68231	0.000353991	4.44956	0.0268121	Intergenic	Intergenic
chr1	50926745	50928253	142.636	165.106	77.6775	81.4129	234.16	221.313	78.6222	75.4375	-0.949019	0.00337734	-1.56268	2.65275e-11	Intergenic,Tmeff2	Intergenic,Promoter
chr1	51008389	51008604	30.9765	33.0211	2.74965	2.06109	25.2893	17.4066	3.33549	1.72758	-3.74917	5.76995e-05	-3.05318	0.00124052	Tmeff2	Promoter
chr1	51065690	51065999	49.7065	36.795	6.1867	3.6069	28.0992	48.0754	9.05346	5.18273	-3.16992	2.72413e-05	-2.4102	0.000401765	Intergenic	Intergenic
chr1	51092429	51092694	18.73	26.4169	3.43706	3.09163	36.529	38.9577	2.38249	0	-2.79026	0.00600828	-4.89083	2.53847e-07	Intergenic	Intergenic
chr1	51104863	51105023	10.0854	6.60422	2.74965	3.6069	18.7328	27.3533	3.81198	2.87929	-1.39171	0.352087	-2.77834	0.00149045	Intergenic	Intergenic
chr1	51156408	51156554	9.365	9.4346	1.37482	0	14.0496	15.7488	2.85899	2.30343	-3.89084	0.0404609	-2.52389	0.0161064	Intergenic	Intergenic
chr1	51238463	51238625	10.0854	21.6996	0.687411	4.12217	18.7328	18.2355	4.28848	4.60687	-2.66778	0.040837	-2.05666	0.0220742	9330175M20Rik	Intron
chr1	51286570	51287264	113.821	105.668	11.686	8.24435	111.46	80.402	10.483	2.87929	-3.47922	2.99276e-13	-3.8257	9.3942e-06	9330175M20Rik	Intron
chr1	51466271	51467663	111.66	121.706	41.2447	32.9774	146.116	124.333	41.4553	46.0687	-1.65728	2.15496e-05	-1.62835	3.31474e-07	Nabp1,Nabp1,Nabp1	Exon,Exon,Exon
chr1	51467890	51468629	53.3085	73.5899	10.9986	15.4581	85.2344	64.6531	37.1668	17.2758	-2.24783	8.467e-05	-1.44943	0.00280693	Nabp1,Nabp1,Nabp1	Exon,Exon,Exon
chr1	51473334	51474178	72.0385	42.4557	27.4965	27.8247	89.9176	91.1775	25.2544	17.2758	-1.05566	0.0624327	-2.08237	5.35549e-07	Nabp1,Nabp1,Nabp1,Nabp1	Intron,Intron,Intron,Intron
chr1	51476077	51476751	39.6212	46.2296	119.61	125.726	36.529	62.1665	71.4747	100.199	1.51979	6.21438e-05	0.790769	0.0654919	Nabp1,Nabp1,Nabp1,Nabp1	Intron,Intron,Intron,Intron
chr1	51476934	51479213	462.487	459.465	1072.36	1239.74	706.228	766.72	932.506	948.439	1.32724	2.6268e-20	0.351628	0.000649021	Nabp1,Nabp1,Nabp1,Nabp1,Nabp1,Nabp1,Nabp1,Nabp1,Nabp1,Nabp1,Nabp1,Nabp1,Nabp1,Nabp1,Nabp1,Nabp1,Nabp1,Nabp1,Nabp1,Nabp1,Intergenic	Intron,Intron,Intron,Intron,Promoter,Promoter,Promoter,Promoter,Exon,Exon,Exon,Exon,Intron,Intron,Intron,Intron,Exon,Exon,Exon,Exon,Intergenic
chr1	51480445	51480929	18.73	25.4734	70.8034	96.3558	30.9092	48.9043	110.071	112.868	1.93152	9.96176e-05	1.47507	7.97864e-05	Intergenic	Intergenic
chr1	51493596	51494317	30.2562	24.53	77.6775	84.5045	37.4657	64.6531	103.4	65.6479	1.56043	0.00100928	0.7248	0.103107	Intergenic	Intergenic
chr1	51498964	51499804	123.186	139.632	44.6817	63.8937	127.383	146.713	42.8848	58.1617	-1.2668	0.000663703	-1.44549	7.07079e-06	Intergenic	Intergenic
chr1	51503135	51503385	36.0192	30.1907	2.74965	1.54581	38.4023	31.4977	10.483	4.60687	-3.98158	2.80118e-05	-2.19315	0.00158873	Intergenic	Intergenic
chr1	51503500	51503650	23.0523	7.54768	1.37482	1.54581	24.3527	16.5777	2.38249	3.45515	-3.39355	0.013852	-2.81821	0.0025406	Intergenic	Intergenic
chr1	51506348	51506498	4.32231	6.60422	2.06223	2.06109	11.2397	15.7488	3.33549	0.575859	-1.40001	0.448616	-2.74935	0.0206703	Intergenic	Intergenic
chr1	51507268	51507451	25.9338	27.3604	4.12447	3.6069	14.9863	20.7222	2.38249	1.72758	-2.79012	0.00248154	-3.1106	0.0024873	Intergenic	Intergenic
chr1	51507552	51507744	22.3319	15.0954	6.1867	1.54581	16.8595	25.6955	1.90599	1.72758	-2.31733	0.0417191	-3.54893	0.000376382	Intergenic	Intergenic
chr1	51509041	51509502	87.8869	89.6287	160.854	198.895	130.193	138.424	111.977	109.989	1.02162	0.000935079	-0.275606	0.344725	Intergenic	Intergenic
chr1	51509587	51510311	54.7492	61.3249	22.6846	15.9734	76.8046	90.3486	28.5899	20.7309	-1.59353	0.00466542	-1.75609	3.10731e-05	Intergenic	Intergenic
chr1	51511693	51512011	10.8058	19.8127	8.93635	4.63744	35.5924	38.9577	10.9595	6.33444	-1.17932	0.289125	-2.09666	0.00122857	Intergenic	Intergenic
chr1	51512545	51513674	103.735	131.141	12.3734	9.79016	257.576	292.597	14.7714	17.8516	-3.41463	1.31748e-13	-4.08453	1.01737e-44	Intergenic	Intergenic
chr1	51514320	51515069	130.39	157.558	33.6832	27.3094	305.345	306.688	34.3079	18.4275	-2.24357	1.44403e-09	-3.51771	4.20201e-38	Intergenic	Intergenic
chr1	51518449	51518577	7.92423	4.7173	5.49929	6.18326	15.9229	20.7222	6.19447	1.15172	-0.121145	0.93875	-2.28972	0.0228674	Intergenic	Intergenic
chr1	51519218	51519443	5.76308	11.3215	10.3112	7.72907	24.3527	33.9843	8.57696	12.093	0.086593	0.94872	-1.50568	0.0304355	Intergenic	Intergenic
chr1	51520309	51520760	15.8485	7.54768	41.2447	42.7675	12.1763	4.97332	47.1733	36.855	1.8227	0.0104888	2.3114	0.000613396	Intergenic	Intergenic
chr1	51528165	51528324	8.64462	5.66076	6.1867	5.15272	24.3527	18.2355	2.38249	4.03101	-0.345489	0.817413	-2.74445	0.00252497	Intergenic	Intergenic
chr1	51529701	51530306	25.2135	34.908	63.2418	60.2868	71.1847	91.1775	39.0728	53.5549	1.04628	0.0485444	-0.815548	0.0460228	Intergenic	Intergenic
chr1	51532119	51532673	28.8154	28.3038	7.56153	14.4276	73.058	84.5464	16.6774	29.3688	-1.3633	0.0944528	-1.78588	7.96392e-05	Intergenic	Intergenic
chr1	51535205	51535888	20.8912	25.4734	16.4979	16.4887	101.157	78.7442	12.3889	23.6102	-0.487936	0.552799	-2.33297	2.40866e-07	Intergenic	Intergenic
chr1	51536009	51536715	38.1804	39.6253	28.1839	35.0385	95.5374	96.9797	30.0194	31.6722	-0.295345	0.639797	-1.64296	1.28301e-05	Intergenic	Intergenic
chr1	51537198	51538526	209.632	186.805	64.6167	70.5922	310.965	299.228	81.4811	78.8926	-1.55118	1.39176e-07	-1.92685	1.13683e-20	Intergenic	Intergenic
chr1	51538960	51539458	46.825	61.3249	12.3734	15.4581	48.7054	71.2842	12.3889	13.8206	-1.94866	0.00114476	-2.19976	1.98943e-05	Intergenic	Intergenic
chr1	51539674	51540063	15.8485	15.0954	39.1824	61.8326	22.4794	20.7222	37.1668	32.8239	1.70958	0.00704401	0.698317	0.242634	Intergenic	Intergenic
chr1	51569633	51570129	16.5688	19.8127	8.93635	16.4887	61.8183	74.5998	17.6304	11.5172	-0.504237	0.598626	-2.21843	5.04732e-06	Intergenic	Intergenic
chr1	51572382	51573493	85.7258	102.837	28.8713	35.5537	192.948	181.526	44.7908	38.0067	-1.54213	0.000390429	-2.1731	8.7619e-15	Intergenic	Intergenic
chr1	51577600	51578250	42.5027	43.3992	53.6181	70.5922	156.419	155.831	68.6157	78.3168	0.535769	0.292525	-1.08952	9.52694e-05	Intergenic	Intergenic
chr1	51579714	51579828	8.64462	10.3781	15.8105	3.6069	20.6061	17.4066	3.33549	7.48616	0.0162981	0.990595	-1.82723	0.041979	Intergenic	Intergenic
chr1	51584444	51585772	435.833	430.218	161.542	147.883	929.148	1063.46	165.821	154.906	-1.4869	1.71667e-13	-2.63432	3.23699e-97	Gm17767,Gm17767	Intron,Intron
chr1	51586410	51586820	12.2465	28.3038	4.12447	8.75962	30.9092	45.5888	20.0129	7.48616	-1.62807	0.11639	-1.46502	0.0283626	Gm17767,Gm17767	Intron,Intron
chr1	51593860	51594607	108.058	89.6287	68.7411	68.5311	162.976	172.408	59.0857	87.5305	-0.529022	0.183417	-1.19948	4.26845e-05	Gm17767,Gm17767	Intron,Intron
chr1	51596650	51597735	95.8112	103.781	65.9915	64.4089	182.645	171.58	80.5282	82.3478	-0.613323	0.118622	-1.12073	1.50276e-05	Gm17767,Gm17767,Gm17767	Intron,Promoter,Exon
chr1	51644513	51644738	6.48346	8.49114	36.4328	24.733	13.113	8.28886	20.9659	20.7309	2.03605	0.0153415	0.968871	0.22702	Intergenic	Intergenic
chr1	51789340	51789804	3.60192	14.1519	41.2447	74.7144	6.55649	4.14443	69.0922	33.3998	2.75544	0.000149456	3.27481	4.83635e-06	Myo1b,Myo1b,Myo1b,Myo1b	Intron,Intron,Intron,Intron
chr1	51805127	51805488	13.6873	11.3215	28.1839	34.5232	11.2397	8.28886	34.7843	26.4895	1.32312	0.0838232	1.65711	0.0194949	Myo1b,Myo1b,Myo1b,Myo1b	Intron,Intron,Intron,Intron
chr1	51820997	51821405	27.3746	22.6431	2.06223	10.3054	33.7191	49.7332	11.436	9.21374	-1.98419	0.0455904	-2.01292	0.000934136	Myo1b,Myo1b,Myo1b,Myo1b	Intron,Intron,Intron,Intron
chr1	51907752	51908371	15.8485	6.60422	77.6775	91.2031	10.3031	4.14443	91.4876	67.3755	2.87735	2.48846e-07	3.48391	1.66003e-09	Myo1b,Myo1b	Intron,Intron
chr1	51917255	51917488	28.8154	22.6431	4.81188	1.03054	9.36641	9.94664	5.71798	9.21374	-3.19874	0.00204786	-0.378074	0.737211	Gm33795	Promoter
chr1	51930388	51931159	17.2892	19.8127	120.984	110.268	14.9863	25.6955	91.4876	104.806	2.64494	1.42261e-09	2.25953	1.87991e-07	Intergenic	Intergenic
chr1	51934132	51935148	119.584	80.1941	260.529	256.605	233.224	237.89	217.76	191.761	1.36317	1.13715e-06	-0.20089	0.357994	Intergenic	Intergenic
chr1	51970229	51970511	38.1804	45.2861	6.87411	12.8818	25.2893	31.4977	7.14747	15.5482	-2.05921	0.00360209	-1.3367	0.0643671	Intergenic	Intergenic
chr1	51996981	51997393	9.365	8.49114	36.4328	44.8286	3.74657	6.63109	22.3954	16.6999	2.18444	0.00252066	1.90501	0.0386319	Stat4	Promoter
chr1	52007752	52009279	149.84	96.233	81.1145	120.574	211.681	253.639	90.0581	92.1374	-0.287696	0.482263	-1.35447	6.36872e-09	Stat4,Stat4	Promoter,Promoter
chr1	52011270	52011788	38.9008	21.6996	18.5601	25.2483	79.6145	94.4931	24.3014	15.5482	-0.471637	0.530452	-2.1193	9.49446e-07	Stat4	Promoter
chr1	52014462	52014631	5.04269	10.3781	9.62376	7.72907	15.9229	15.7488	5.71798	2.30343	0.18061	0.895396	-1.96257	0.0483781	Stat4	Promoter
chr1	52014780	52014943	7.20385	6.60422	13.0608	10.3054	23.416	15.7488	5.71798	4.60687	0.753894	0.529352	-1.91567	0.0284907	Stat4	Promoter
chr1	52019532	52020569	131.11	119.819	54.3055	34.5232	310.965	303.372	54.7973	40.3101	-1.50886	0.000117634	-2.6833	1.63129e-30	Stat4	Promoter
chr1	52022008	52022841	68.4365	95.2895	50.181	88.1114	244.463	240.377	59.0857	57.01	-0.232706	0.636546	-2.06127	4.18112e-18	Stat4	Promoter
chr1	52027568	52028166	70.5977	66.0422	10.3112	5.66799	137.686	109.413	10.9595	7.48616	-3.12256	1.37734e-07	-3.72869	2.16792e-18	Stat4	Promoter
chr1	52034733	52035699	46.1046	43.3992	35.058	42.7675	120.827	111.9	45.7438	30.5205	-0.199666	0.735709	-1.60239	8.31164e-06	Stat4	Promoter
chr1	52038823	52040533	218.277	266.056	57.0551	66.9853	458.018	513.081	65.7567	77.1651	-1.95893	5.22234e-12	-2.7696	4.18789e-52	Stat4	Promoter
chr1	52055622	52056487	97.9723	83.968	28.8713	28.8552	148.926	168.264	39.5493	19.5792	-1.65808	0.000162176	-2.41071	1.23549e-11	Stat4	Promoter
chr1	52066247	52067031	61.9531	66.0422	17.8727	17.5192	174.215	164.948	22.3954	33.9757	-1.85438	0.000509046	-2.59881	5.19402e-16	Intergenic	Intergenic
chr1	52100383	52100843	27.3746	35.8515	81.1145	104.085	47.7687	63.8243	64.3272	70.8306	1.56041	0.000575419	0.272415	0.534872	Intergenic	Intergenic
chr1	52116884	52117079	7.92423	3.77384	15.1231	14.9429	4.68321	3.31555	20.9659	17.2758	1.34215	0.237953	2.26624	0.0185565	Intergenic	Intergenic
chr1	52118493	52120788	245.651	260.395	569.864	620.387	473.004	348.132	433.137	485.449	1.2359	2.57276e-12	0.163467	0.367	Intergenic,Stat1,Stat1,Stat1,Stat1,Stat1	Intergenic,Promoter,Promoter,Promoter,Promoter,Promoter
chr1	52129822	52130184	35.2988	22.6431	19.2475	21.6414	19.6695	14.0911	40.0258	43.7653	-0.507632	0.498084	1.31595	0.0237674	Stat1	Promoter
chr1	52133118	52133559	21.6115	10.3781	20.6223	58.741	14.9863	10.7755	42.4083	32.2481	1.30368	0.100597	1.54259	0.0154584	Stat1	Promoter
chr1	52146603	52146916	21.6115	27.3604	18.5601	13.9123	40.2756	57.1932	11.9124	10.9413	-0.594202	0.464292	-2.09306	0.000201069	Intergenic	Intergenic
chr1	52158908	52159116	5.04269	4.7173	19.2475	20.6109	3.74657	8.28886	22.3954	13.8206	2.02819	0.0497114	1.5802	0.0938713	Intergenic	Intergenic
chr1	52170867	52171832	52.5881	62.2684	35.058	60.802	112.397	77.9153	52.4148	28.2171	-0.251076	0.652062	-1.22952	0.00410377	Gls,Gls,Gls,Gls,Gls	Intron,Intron,Intron,Intron,Intron
chr1	52176328	52176439	4.32231	2.83038	2.06223	2.57636	11.2397	12.4333	0.952996	1.72758	-0.627422	0.77003	-3.16384	0.0124764	Gls,Gls,Gls,Gls,Gls	Intron,Intron,Intron,Intron,Intron
chr1	52224248	52224553	7.92423	18.8692	7.56153	13.3971	30.9092	21.551	3.81198	4.60687	-0.333318	0.772618	-2.64236	0.0010556	Gls,Gls,Gls,Gls,Gls,Gls,Gls	Intron,Intron,Intron,Intron,Intron,Intron,Intron
chr1	52231265	52233908	494.184	486.826	1317.08	1520.57	754.933	716.158	1108.33	1096.43	1.53289	4.42351e-29	0.584512	5.95137e-10	Gls,Gls,Gls,Gls,Gls,Gls,Gls,Gls,Gls,Gls,Gls,Gls,Gls,Gls,Gls,Gls,Gls,Gls,Gls,Gls,Gls,Intergenic	Intron,Intron,Intron,Intron,Intron,Intron,Intron,Promoter,Promoter,Promoter,Exon,Exon,Exon,Exon,Exon,Exon,Exon,Promoter,Promoter,Promoter,Promoter,Intergenic
chr1	52298332	52298589	2.16115	11.3215	28.8713	27.3094	7.49313	10.7755	18.5834	16.6999	2.10225	0.0284357	0.945337	0.275737	Intergenic	Intergenic
chr1	52302646	52302873	10.0854	6.60422	24.7468	39.1606	22.4794	19.8933	23.8249	16.124	1.92751	0.0192793	-0.0793535	0.919306	Intergenic	Intergenic
chr1	52331456	52331795	9.365	9.4346	76.9901	90.6878	18.7328	21.551	69.5687	58.1617	3.15866	9.58968e-09	1.66373	0.000634287	Gm31955	Promoter
chr1	52363670	52363968	20.1708	17.9257	17.1853	11.336	44.0221	59.6798	14.2949	14.9723	-0.426472	0.641624	-1.82823	0.000572568	Intergenic	Intergenic
chr1	52374662	52375088	32.4173	35.8515	14.4356	15.9734	57.1351	55.5354	8.57696	19.5792	-1.16307	0.10029	-2.01557	0.000272857	Intergenic	Intergenic
chr1	52419256	52419761	15.1281	29.2473	27.4965	19.065	61.8183	71.2842	28.1134	27.6412	0.0754715	0.930851	-1.25624	0.00453457	Intergenic	Intergenic
chr1	52442858	52443141	28.8154	26.4169	4.12447	3.6069	43.0855	24.0377	6.19447	5.18273	-2.84334	0.00176822	-2.55226	0.000416447	Intergenic	Intergenic
chr1	52511811	52512171	10.8058	14.1519	13.0608	5.66799	47.7687	33.9843	10.9595	11.5172	-0.422943	0.717848	-1.86137	0.00194938	Gm553	Promoter
chr1	52514443	52514601	2.88154	2.83038	15.8105	17.5192	0	2.48666	18.5834	14.9723	2.54495	0.0341656	3.69648	0.00502349	Intergenic	Intergenic
chr1	52578250	52578977	32.4173	36.795	86.6138	80.3824	76.8046	77.9153	70.5217	42.6135	1.27332	0.00509286	-0.446654	0.298113	Gm28178,Gm28178,Gm28178	Intron,Exon,Intron
chr1	52596242	52596552	42.5027	51.8903	2.06223	7.72907	59.0084	32.3266	1.42949	9.7896	-3.21865	2.40726e-05	-3.03786	0.0243696	Gm28178	Promoter
chr1	52599740	52600185	28.8154	24.53	4.81188	4.63744	56.1985	75.4287	7.14747	5.75859	-2.50032	0.00539566	-3.34485	1.12644e-09	Gm28178	Promoter
chr1	52630439	52631575	168.57	157.558	393.199	429.221	306.282	292.597	418.842	411.739	1.3336	1.55601e-10	0.472614	0.00225413	Tmem194b	Promoter
chr1	52648190	52648448	18.0096	22.6431	30.9335	74.1991	17.7962	14.0911	38.5963	34.5515	1.38273	0.0367741	1.20234	0.0496963	Intergenic	Intergenic
chr1	52649929	52650388	29.5358	36.795	13.0608	16.4887	56.1985	58.0221	20.0129	17.2758	-1.15847	0.110265	-1.61247	0.00099233	Intergenic	Intergenic
chr1	52653311	52653692	38.1804	22.6431	62.5544	70.5922	66.5015	44.7599	43.8378	59.3134	1.11952	0.0350023	-0.108566	0.832715	Intergenic	Intergenic
chr1	52702852	52703549	35.2988	33.9646	123.047	78.8365	20.6061	51.391	68.6157	77.7409	1.53845	0.000585179	1.01347	0.0401332	Mfsd6,Mfsd6,Mfsd6,Mfsd6	Intron,Intron,Intron,Intron
chr1	52722402	52723005	17.2892	5.66076	146.419	160.765	14.0496	12.4333	113.883	109.989	3.69084	2.37343e-15	3.08291	1.77727e-12	Mfsd6,Mfsd6,Mfsd6,Mfsd6	Intron,Intron,Intron,Intron
chr1	52734248	52734530	8.64462	7.54768	33.6832	27.3094	0.936641	4.14443	39.0728	29.3688	1.90662	0.0201518	3.71615	4.70234e-05	Intergenic	Intergenic
chr1	52748310	52748695	10.8058	21.6996	41.2447	61.8326	29.9725	21.551	31.9254	23.6102	1.68734	0.00961646	0.114789	0.868513	Intergenic	Intergenic
chr1	52753856	52754335	37.46	43.3992	15.1231	19.065	50.5786	45.5888	14.7714	16.6999	-1.23476	0.0603067	-1.61306	0.00253521	Intergenic	Intergenic
chr1	52763994	52764429	23.0523	27.3604	81.802	84.5045	52.4519	48.9043	55.2738	74.2858	1.72771	0.000254043	0.35227	0.43181	Intergenic	Intergenic
chr1	52764525	52764743	7.20385	6.60422	28.8713	24.2178	5.61985	4.97332	24.7779	24.1861	1.93813	0.0282728	2.2114	0.00838475	Intergenic	Intergenic
chr1	52765312	52765604	5.04269	4.7173	39.8699	49.4661	0	9.11775	17.6304	33.3998	3.19269	3.45143e-05	2.47639	0.320429	Intergenic	Intergenic
chr1	52765965	52766063	1.44077	5.66076	9.62376	8.24435	0	0	8.10046	9.21374	1.3628	0.366737	5.73832	0.0050966	Intergenic	Intergenic
chr1	52799178	52800940	183.698	200.957	646.854	601.322	431.792	402.01	511.282	628.838	1.69995	3.93658e-21	0.450498	0.00228286	Inpp1,Inpp1,Inpp1,Inpp1,Inpp1,Inpp1,Inpp1,Inpp1,Inpp1	Intron,Intron,Intron,Exon,Exon,Exon,Intron,Intron,Intron
chr1	52801579	52802216	43.2231	46.2296	148.481	145.307	54.3252	68.7976	119.124	146.268	1.71745	9.11636e-07	1.10336	0.000685613	Inpp1,Inpp1,Inpp1	Intron,Intron,Intron
chr1	52834920	52835163	11.5262	9.4346	6.1867	3.09163	19.6695	31.4977	0.952996	1.15172	-1.19362	0.365788	-4.61549	1.9968e-05	Intergenic	Intergenic
chr1	52844294	52846015	348.666	360.402	1057.93	1264.48	526.392	694.607	934.412	928.86	1.7133	1.23517e-29	0.608801	0.00399427	Intergenic,Hibch	Intergenic,Promoter
chr1	52847644	52847950	4.32231	3.77384	40.5573	30.401	2.80992	3.31555	23.3484	35.7032	3.12239	0.000317382	3.26186	0.000299953	Hibch	Promoter
chr1	52863496	52864030	54.7492	51.8903	7.56153	10.8207	86.171	77.9153	14.2949	10.3655	-2.5241	5.81085e-05	-2.72477	2.53923e-09	Hibch	Promoter
chr1	53296534	53297822	262.94	221.713	734.843	897.088	373.72	388.748	748.102	694.486	1.74911	1.12625e-22	0.920011	2.93817e-14	Pms1,Pms1,Ormdl1,Pms1,Intergenic	Intron,Promoter,Promoter,Exon,Intergenic
chr1	53298964	53299185	9.365	8.49114	4.81188	3.09163	28.0992	27.3533	4.28848	11.5172	-1.18733	0.401235	-1.82827	0.017107	Ormdl1	Promoter
chr1	53313112	53314108	58.3512	80.1941	194.537	183.437	112.397	96.1508	175.351	157.209	1.45557	3.6665e-06	0.676105	0.0121753	Osgepl1,Osgepl1,Osgepl1,Osgepl1	Promoter,Promoter,Promoter,Promoter
chr1	53352275	53353170	213.234	227.374	500.435	577.619	241.653	277.677	463.632	522.304	1.29343	7.71144e-12	0.922046	2.42096e-09	Asnsd1,Asnsd1,Asnsd1,Intergenic	Intron,Promoter,Exon,Intergenic
chr1	53761556	53762405	143.357	177.371	59.8048	46.8897	152.673	133.451	70.5217	71.4065	-1.59105	2.88108e-06	-1.01055	0.00053108	Stk17b,Stk17b	Intron,Intron
chr1	53765410	53765863	59.7919	65.0988	10.9986	12.8818	66.5015	34.8132	26.2074	10.9413	-2.3803	2.58847e-05	-1.43302	0.018482	Stk17b,Stk17b	Intron,Intron
chr1	53784112	53785772	275.907	300.964	617.983	713.651	333.444	314.148	564.174	533.821	1.20969	3.78189e-12	0.763047	2.33402e-08	Stk17b,Stk17b,Stk17b,Stk17b,Stk17b,Stk17b,Intergenic	Intron,Intron,Promoter,Promoter,Exon,Exon,Intergenic
chr1	53795080	53795434	30.9765	33.0211	8.93635	10.8207	54.3252	61.3376	13.3419	13.2447	-1.68966	0.0271919	-2.12186	2.87666e-05	Intergenic	Intergenic
chr1	53795629	53795873	23.0523	12.265	8.93635	11.336	26.226	38.9577	7.14747	5.18273	-0.805205	0.416963	-2.397	0.000761214	Intergenic	Intergenic
chr1	53796998	53798184	82.8442	105.668	37.8076	28.3399	187.328	160.804	29.5429	37.4308	-1.51467	0.000604623	-2.38256	4.03439e-15	Intergenic	Intergenic
chr1	53816413	53816761	9.365	12.265	42.6195	32.4621	8.42977	1.65777	30.9724	33.3998	1.80151	0.0140414	2.70394	0.00106775	Hecw2,Hecw2,Hecw2,Hecw2,Hecw2,Hecw2	Intron,Intron,Intron,Intron,Intron,Intron
chr1	53818175	53818390	2.88154	4.7173	24.0594	16.4887	0	4.14443	22.8719	21.8826	2.43217	0.0250382	3.3794	0.00201722	Hecw2,Hecw2,Hecw2,Hecw2,Hecw2,Hecw2	Intron,Intron,Intron,Intron,Intron,Intron
chr1	53824794	53825320	27.3746	37.7384	89.3635	77.806	26.226	33.1555	75.7632	87.5305	1.36747	0.00345033	1.45465	0.000607296	Hecw2,Hecw2,Hecw2,Hecw2,Hecw2,Hecw2	Intron,Intron,Intron,Intron,Intron,Intron
chr1	53830253	53830595	8.64462	9.4346	42.6195	47.405	4.68321	5.80221	51.4618	30.5205	2.32043	0.000779652	2.96476	5.92379e-05	Hecw2,Hecw2,Hecw2,Hecw2,Hecw2,Hecw2	Intron,Intron,Intron,Intron,Intron,Intron
chr1	53837951	53839239	152.001	170.766	368.452	334.927	188.265	192.302	357.85	363.943	1.12551	4.13781e-07	0.922977	9.71909e-08	Hecw2,Hecw2,Hecw2,Hecw2,Hecw2,Hecw2,Hecw2,Hecw2,Hecw2,Hecw2,Hecw2,Hecw2,Hecw2,Hecw2,Hecw2,Hecw2,Hecw2,Hecw2	Intron,Intron,Intron,Intron,Intron,Intron,Exon,Exon,Exon,Exon,Exon,Exon,Intron,Intron,Intron,Intron,Intron,Intron
chr1	53842711	53843431	56.19	66.0422	8.24894	14.4276	98.3473	119.36	8.57696	17.8516	-2.4105	4.82724e-05	-3.06279	2.94073e-12	Hecw2,Hecw2,Hecw2,Hecw2,Hecw2,Hecw2	Intron,Intron,Intron,Intron,Intron,Intron
chr1	53843597	53843830	12.2465	7.54768	3.43706	1.54581	29.0359	22.3799	5.71798	5.18273	-2.01928	0.16961	-2.23343	0.0041132	Hecw2,Hecw2,Hecw2,Hecw2,Hecw2,Hecw2	Intron,Intron,Intron,Intron,Intron,Intron
chr1	53848219	53848387	8.64462	3.77384	25.4342	14.4276	1.87328	1.65777	15.2479	13.8206	1.65438	0.113576	3.04532	0.0134965	Hecw2,Hecw2,Hecw2,Hecw2,Hecw2,Hecw2	Intron,Intron,Intron,Intron,Intron,Intron
chr1	53848563	53848905	7.92423	2.83038	21.9972	25.2483	1.87328	3.31555	28.1134	35.1274	2.10375	0.0336858	3.5895	8.76738e-05	Hecw2,Hecw2,Hecw2,Hecw2,Hecw2,Hecw2,Mir7681	Intron,Intron,Intron,Intron,Intron,Intron,Promoter
chr1	53850828	53851896	44.6638	57.5511	211.035	225.174	95.5374	126.82	230.149	192.337	2.10245	5.56247e-12	0.923908	0.000292531	Hecw2,Hecw2,Hecw2,Hecw2,Hecw2,Hecw2,Hecw2,Hecw2,Hecw2,Hecw2,Hecw2,Hecw2,Hecw2,Hecw2,Hecw2,Hecw2,Hecw2,Hecw2	Intron,Intron,Intron,Intron,Intron,Intron,Exon,Exon,Exon,Exon,Exon,Exon,Intron,Intron,Intron,Intron,Intron,Intron
chr1	53855668	53857060	88.6073	85.8549	187.663	228.265	103.031	86.2042	193.458	202.702	1.25452	1.5963e-05	1.06804	2.2811e-05	Hecw2,Hecw2,Hecw2,Hecw2,Hecw2,Hecw2	Intron,Intron,Intron,Intron,Intron,Intron
chr1	53881762	53882033	34.5785	36.795	6.1867	9.27489	9.36641	30.6688	7.14747	8.06202	-2.19309	0.00379239	-1.40559	0.118076	Hecw2,Hecw2,Hecw2,Hecw2,Hecw2,Hecw2	Intron,Intron,Intron,Intron,Intron,Intron
chr1	53882544	53882877	21.6115	16.0388	48.1188	43.7981	6.55649	5.80221	29.5429	36.2791	1.2787	0.0416239	2.41433	0.00116651	Hecw2,Hecw2,Hecw2,Hecw2,Hecw2,Hecw2	Intron,Intron,Intron,Intron,Intron,Intron
chr1	53889262	53890030	65.555	41.5123	7.56153	11.336	155.482	155.002	21.9189	11.5172	-2.49339	0.000114244	-3.1968	2.49067e-18	Hecw2,Hecw2,Hecw2,Hecw2,Hecw2,Hecw2	Intron,Intron,Intron,Intron,Intron,Intron
chr1	53890479	53890685	4.32231	6.60422	13.7482	30.9163	26.226	29.011	10.0065	28.7929	2.05218	0.0451768	-0.520524	0.487987	Hecw2,Hecw2,Hecw2,Hecw2,Hecw2,Hecw2	Intron,Intron,Intron,Intron,Intron,Intron
chr1	53906237	53906485	5.76308	12.265	6.1867	4.12217	26.226	29.011	10.9595	7.48616	-0.803302	0.564405	-1.57597	0.0270455	Hecw2,Hecw2,Hecw2,Hecw2,Hecw2,Hecw2	Intron,Intron,Intron,Intron,Intron,Intron
chr1	53908127	53908317	9.365	6.60422	3.43706	5.66799	21.5428	15.7488	1.42949	0.575859	-0.806167	0.581038	-4.17755	0.000385934	Hecw2,Hecw2,Hecw2,Hecw2,Hecw2,Hecw2	Intron,Intron,Intron,Intron,Intron,Intron
chr1	53908490	53908645	15.1281	13.2084	6.87411	7.2138	21.5428	11.6044	2.38249	5.18273	-1.00917	0.357364	-2.14429	0.0320795	Hecw2,Hecw2,Hecw2,Hecw2,Hecw2,Hecw2	Intron,Intron,Intron,Intron,Intron,Intron
chr1	53936107	53936287	3.60192	3.77384	11.686	8.24435	20.6061	23.2088	6.67097	4.60687	1.43168	0.303719	-1.95068	0.0179902	Hecw2,Hecw2,Hecw2,Hecw2,Hecw2,Hecw2,Hecw2	Intron,Intron,Intron,Intron,Intron,Intron,Intron
chr1	53936597	53936772	3.60192	4.7173	3.43706	3.6069	26.226	15.7488	3.33549	2.30343	-0.234319	0.903784	-2.88147	0.00207555	Hecw2,Hecw2,Hecw2,Hecw2,Hecw2,Hecw2,Hecw2	Intron,Intron,Intron,Intron,Intron,Intron,Intron
chr1	53940224	53940928	33.8581	29.2473	87.9887	95.3252	42.1489	36.471	60.0387	54.7066	1.53502	0.000520227	0.548096	0.237839	Hecw2,Hecw2,Hecw2,Hecw2,Hecw2,Hecw2,Hecw2,Hecw2,Hecw2	Intron,Intron,Intron,Intron,Intron,Intron,Intron,Exon,Promoter
chr1	53945936	53946122	14.4077	16.0388	4.81188	2.57636	27.1626	14.92	7.62397	2.87929	-2.06076	0.0790733	-1.98013	0.0276884	Hecw2,Hecw2,Hecw2,Hecw2,Hecw2,Hecw2	Intron,Intron,Intron,Intron,Intron,Intron
chr1	53997224	53997704	32.4173	17.9257	5.49929	3.6069	66.5015	54.7065	5.24148	6.33444	-2.48786	0.0091186	-3.39369	2.70196e-09	Hecw2,Hecw2,Hecw2,Hecw2	Intron,Intron,Intron,Intron
chr1	54009502	54009909	18.73	21.6996	3.43706	6.18326	51.5153	44.7599	3.81198	1.15172	-2.05201	0.0436689	-4.23135	9.8597e-09	Hecw2,Hecw2,Hecw2,Hecw2	Intron,Intron,Intron,Intron
chr1	54093339	54093640	49.7065	67.9292	3.43706	3.09163	43.0855	49.7332	1.42949	2.87929	-4.17487	8.32407e-09	-4.46141	7.05529e-09	Hecw2,Hecw2,Hecw2,Hecw2	Intron,Intron,Intron,Intron
chr1	54194628	54195005	28.095	15.0954	10.3112	10.3054	36.529	31.4977	14.7714	13.8206	-1.07506	0.239595	-1.2481	0.04362	Hecw2,Hecw2,Hecw2,Hecw2,Hecw2,Hecw2,Hecw2,Hecw2	Intron,Intron,Promoter,Promoter,Promoter,Promoter,Exon,Exon
chr1	54250451	54251225	108.778	106.611	283.213	322.56	226.667	194.788	273.986	295.415	1.49248	9.47248e-10	0.435132	0.0278901	Intergenic,Ccdc150,Ccdc150,Ccdc150,Ccdc150,Ccdc150,Ccdc150,Ccdc150,Ccdc150,Ccdc150	Intergenic,Promoter,Promoter,Promoter,Promoter,Promoter,Promoter,Promoter,Promoter,Promoter
chr1	54254650	54254915	27.3746	19.8127	4.81188	3.6069	35.5924	23.2088	4.76498	5.18273	-2.50095	0.00972237	-2.56275	0.000732334	Ccdc150	Promoter
chr1	54279510	54280244	113.1	117.933	18.5601	20.6109	168.595	195.617	18.1069	24.7619	-2.55594	8.53669e-10	-3.09706	4.99563e-22	Ccdc150	Promoter
chr1	54438672	54439299	47.5454	50.0034	94.8628	122.119	102.094	80.402	93.8701	89.8339	1.15719	0.00399305	0.0123474	0.975385	Gtf3c3,Gtf3c3,Gtf3c3,Intergenic	Intron,Promoter,Exon,Intergenic
chr1	54443748	54443964	10.0854	3.77384	21.9972	18.0345	8.42977	4.97332	20.9659	22.4585	1.50296	0.141058	1.70486	0.0442827	Gm34066	Intron
chr1	54448859	54449421	28.095	24.53	43.9943	73.6838	34.6557	37.2999	55.2738	47.2204	1.16275	0.042295	0.510942	0.29798	LOC108167366,LOC108167366	Exon,Intron
chr1	54523800	54524033	4.32231	8.49114	32.3083	25.7636	1.87328	0	20.9659	25.3378	2.20237	0.0125935	4.69936	0.000589821	Pgap1	Intron
chr1	54563657	54564465	20.8912	19.8127	143.669	194.257	8.42977	15.7488	168.68	183.699	3.05329	6.2063e-15	3.84685	8.80173e-22	Intergenic	Intergenic
chr1	54568932	54569399	2.16115	10.3781	62.5544	55.1341	14.0496	15.7488	41.9318	38.5825	3.29325	5.98483e-06	1.43278	0.0160499	Intergenic	Intergenic
chr1	54584673	54586549	79.9627	77.3638	248.156	281.338	118.017	108.584	202.988	283.898	1.75099	4.23418e-11	1.10227	9.06776e-06	Intergenic	Intergenic
chr1	54606142	54606446	20.8912	33.0211	3.43706	6.18326	81.4878	53.8776	10.483	6.33444	-2.46168	0.00742659	-2.9923	2.71087e-08	Intergenic	Intergenic
chr1	54798470	54798959	13.6873	13.2084	51.5559	75.7449	20.6061	9.94664	75.7632	65.6479	2.24482	0.00012471	2.22488	1.52226e-05	Ankrd44,Ankrd44,Ankrd44,Ankrd44,Ankrd44	Intron,Intron,Intron,Intron,Intron
chr1	54810125	54810532	12.2465	9.4346	42.6195	44.8286	7.49313	7.45998	55.2738	58.7376	2.00338	0.00335181	2.93037	1.05026e-06	Ankrd44,Ankrd44,Ankrd44,Ankrd44,Ankrd44	Intron,Intron,Intron,Intron,Intron
chr1	54816671	54817062	10.0854	15.0954	35.7454	45.3439	27.1626	13.2622	36.6903	40.3101	1.70187	0.0152925	0.937831	0.126243	Ankrd44,Ankrd44,Ankrd44,Ankrd44,Ankrd44	Intron,Intron,Intron,Intron,Intron
chr1	54822121	54822426	33.1377	15.0954	8.24894	0	44.0221	26.5244	5.71798	5.75859	-2.55983	0.368509	-2.61674	0.000197203	Ankrd44,Ankrd44,Ankrd44,Ankrd44,Ankrd44	Intron,Intron,Intron,Intron,Intron
chr1	54823478	54823886	47.5454	44.3426	6.87411	2.06109	29.0359	35.6421	12.3889	5.75859	-3.41433	1.07302e-05	-1.82082	0.00922003	Ankrd44,Ankrd44,Ankrd44,Ankrd44,Ankrd44	Intron,Intron,Intron,Intron,Intron
chr1	54826707	54826893	5.04269	7.54768	15.8105	19.5803	1.87328	2.48666	15.2479	9.7896	1.50527	0.15126	2.51826	0.0417505	Ankrd44,Ankrd44,Ankrd44,Ankrd44,Ankrd44	Intron,Intron,Intron,Intron,Intron
chr1	54829304	54829705	9.365	12.265	36.4328	31.9468	6.55649	8.28886	28.5899	21.8826	1.66765	0.0272766	1.76322	0.0254914	Ankrd44,Ankrd44,Ankrd44,Ankrd44,Ankrd44	Promoter,Intron,Intron,Intron,Intron
chr1	54836968	54837463	16.5688	12.265	59.8048	51.5272	29.9725	29.011	52.4148	41.4618	1.93755	0.00127222	0.672967	0.195134	Ankrd44,Ankrd44,Ankrd44,Ankrd44	Intron,Intron,Intron,Intron
chr1	54837583	54838174	7.20385	15.0954	112.735	112.844	15.9229	16.5777	79.0987	83.4995	3.37527	1.66838e-11	2.32155	4.84113e-07	Ankrd44,Ankrd44,Ankrd44,Ankrd44	Intron,Intron,Intron,Intron
chr1	54839671	54840515	154.162	133.028	41.2447	31.9468	165.786	150.857	37.1668	49.5238	-1.98098	5.21311e-08	-1.87377	8.52993e-10	Ankrd44,Ankrd44,Ankrd44,Ankrd44	Intron,Intron,Intron,Intron
chr1	54841625	54842297	103.015	103.781	97.6124	139.123	288.486	258.613	113.883	76.0133	0.199299	0.603514	-1.52014	2.51294e-10	Ankrd44,Ankrd44,Ankrd44,Ankrd44	Intron,Intron,Intron,Intron
chr1	54844402	54844935	47.5454	66.0422	17.8727	15.9734	54.3252	71.2842	15.2479	16.6999	-1.74578	0.00246944	-1.979	4.99036e-05	Ankrd44,Ankrd44,Ankrd44,Ankrd44	Intron,Intron,Intron,Intron
chr1	54854351	54854720	15.8485	25.4734	24.7468	11.336	44.9588	54.7065	8.10046	20.1551	-0.198855	0.83186	-1.83474	0.00193642	Ankrd44,Ankrd44,Ankrd44,Ankrd44	Intron,Intron,Intron,Intron
chr1	54865990	54866621	28.095	28.3038	22.6846	8.24435	82.4244	67.1398	23.3484	16.6999	-0.882656	0.289183	-1.89298	2.72361e-05	Ankrd44,Ankrd44,Ankrd44,Ankrd44	Intron,Intron,Intron,Intron
chr1	54866942	54867275	4.32231	6.60422	19.2475	19.065	29.0359	29.011	6.67097	10.9413	1.82398	0.0787446	-1.73037	0.0145558	Ankrd44,Ankrd44,Ankrd44,Ankrd44	Intron,Intron,Intron,Intron
chr1	54867377	54867739	7.92423	13.2084	29.5587	33.4927	33.7191	24.0377	8.57696	17.2758	1.59342	0.0441575	-1.16723	0.0997058	Ankrd44,Ankrd44,Ankrd44,Ankrd44	Intron,Intron,Intron,Intron
chr1	54873857	54874016	12.2465	14.1519	4.12447	6.18326	15.9229	20.7222	0	2.30343	-1.34516	0.254656	-4.07791	0.000799642	Ankrd44,Ankrd44,Ankrd44,Ankrd44	Intron,Intron,Intron,Intron
chr1	54874169	54874395	18.73	16.9823	6.87411	4.12217	22.4794	27.3533	2.85899	2.30343	-1.71441	0.101481	-3.2648	0.000212998	Ankrd44,Ankrd44,Ankrd44,Ankrd44	Intron,Intron,Intron,Intron
chr1	54888422	54889031	25.2135	24.53	69.4285	60.2868	34.6557	38.1288	55.2738	69.103	1.38051	0.00842493	0.769888	0.091997	Ankrd44,Ankrd44,Ankrd44,Ankrd44	Intron,Intron,Intron,Intron
chr1	54897174	54897528	24.4931	22.6431	15.1231	29.8858	37.4657	38.1288	18.1069	10.3655	-0.0588874	0.945649	-1.39971	0.0228208	Ankrd44,Ankrd44,Ankrd44,Ankrd44	Intron,Intron,Intron,Intron
chr1	54901531	54901995	18.0096	36.795	7.56153	9.79016	48.7054	29.011	8.10046	9.7896	-1.64474	0.0578938	-2.11974	0.00100445	Ankrd44,Ankrd44,Ankrd44,Ankrd44	Intron,Intron,Intron,Intron
chr1	54907090	54907512	36.0192	20.7561	17.8727	30.9163	55.2618	55.5354	13.3419	27.0654	-0.219385	0.782216	-1.46596	0.00587373	Ankrd44,Ankrd44,Ankrd44,Ankrd44	Intron,Intron,Intron,Intron
chr1	54908918	54909345	40.3415	27.3604	26.1216	23.1872	95.5374	107.755	24.3014	17.8516	-0.465275	0.499309	-2.26371	1.12369e-08	Ankrd44,Ankrd44,Ankrd44,Ankrd44	Intron,Intron,Intron,Intron
chr1	54914404	54914788	17.2892	20.7561	68.0537	63.8937	38.4023	14.92	49.5558	72.5582	1.7995	0.000810716	1.20358	0.028687	Ankrd44,Ankrd44,Ankrd44,Ankrd44	Intron,Intron,Intron,Intron
chr1	54919987	54920600	60.5123	44.3426	196.6	227.235	44.0221	31.4977	168.204	179.668	2.00667	1.50276e-10	2.20973	1.76364e-12	Ankrd44,Ankrd44,Ankrd44,Ankrd44	Intron,Intron,Intron,Intron
chr1	54922162	54922687	42.5027	42.4557	79.7397	80.3824	26.226	40.6154	69.0922	67.9513	0.91441	0.0423721	1.03019	0.0232231	Ankrd44,Ankrd44,Ankrd44,Ankrd44	Intron,Intron,Intron,Intron
chr1	54934935	54935878	85.0054	101.894	45.3692	71.6227	220.111	217.997	77.1927	51.2514	-0.666591	0.130639	-1.76326	4.22554e-11	Intergenic	Intergenic
chr1	54954862	54955209	18.73	25.4734	11.686	8.75962	50.5786	51.391	9.52996	7.48616	-1.11429	0.211579	-2.57675	5.31216e-06	Intergenic	Intergenic
chr1	55025778	55027873	269.424	288.699	666.789	811.037	296.915	337.357	571.321	571.828	1.40752	8.20092e-16	0.848082	5.6587e-10	Sf3b1,Sf3b1,Sf3b1,Sf3b1,Sf3b1,Sf3b1,Sf3b1,Sf3b1,Sf3b1,Sf3b1,Sf3b1,Sf3b1,Sf3b1,Sf3b1,Sf3b1,Intergenic	Intron,Intron,Intron,Intron,Intron,Promoter,Promoter,Promoter,Promoter,Promoter,Exon,Exon,Exon,Exon,Exon,Intergenic
chr1	55028776	55029747	87.1665	70.7595	188.351	203.017	143.306	154.173	146.285	141.661	1.30478	1.32479e-05	-0.0474008	0.87186	Intergenic	Intergenic
chr1	55031113	55031338	5.04269	6.60422	6.87411	3.6069	27.1626	29.011	2.85899	4.03101	-0.157393	0.924226	-3.03888	0.000165357	Intergenic	Intergenic
chr1	55048949	55049600	36.7396	34.908	97.6124	156.643	32.7824	38.1288	100.541	132.447	1.82955	9.9242e-06	1.71188	3.82304e-06	Intergenic	Intergenic
chr1	55051412	55053523	364.515	402.858	1245.59	1442.25	600.387	564.472	1167.42	1018.12	1.81127	5.95154e-36	0.909574	1.54165e-17	Intergenic,Coq10b	Intergenic,Promoter
chr1	55055365	55055697	4.32231	3.77384	26.809	49.4661	4.68321	2.48666	22.3954	22.4585	3.2338	0.000193922	2.66009	0.00462372	Coq10b	Promoter
chr1	55086947	55089083	577.028	634.949	1247.65	1552	781.159	794.073	1188.86	1157.48	1.2102	2.38801e-16	0.574893	2.84149e-10	Hspd1,Hspd1,Hspd1,Hspe1,Hspd1,Hspd1,Hspd1	Promoter,Intron,Intron,Promoter,Promoter,Exon,Exon
chr1	55122989	55123364	4.32231	13.2084	55.6803	49.9813	8.42977	6.63109	40.0258	38.5825	2.63122	0.000174368	2.38946	0.000396855	Intergenic	Intergenic
chr1	55130647	55132014	235.566	229.261	847.578	941.401	529.202	493.187	766.685	743.433	1.94437	1.02248e-33	0.563924	7.36334e-07	Intergenic,Mob4	Intergenic,Promoter
chr1	55179972	55180269	0.720385	4.7173	26.1216	44.3134	1.87328	0	28.1134	28.7929	3.78383	0.000169488	5.00048	0.000150116	Rftn2,Rftn2,Rftn2,Rftn2,Rftn2,Rftn2	Intron,Intron,Intron,Intron,Intron,Intron
chr1	55196393	55196699	37.46	60.3815	10.3112	8.24435	68.3748	88.6909	7.14747	12.6689	-2.40101	0.000316918	-3.00436	1.44736e-09	Rftn2,Rftn2,Rftn2,Rftn2,Rftn2,Rftn2	Intron,Intron,Intron,Intron,Intron,Intron
chr1	55215270	55215951	22.3319	33.9646	182.164	237.025	41.2122	36.471	194.888	193.489	2.91568	2.40385e-16	2.32441	1.93739e-15	Rftn2,Rftn2,Rftn2,Rftn2,Rftn2,Rftn2	Intron,Intron,Intron,Intron,Intron,Intron
chr1	55236629	55238925	324.893	294.36	701.16	736.323	429.918	411.957	717.606	640.931	1.21331	1.21779e-13	0.691919	3.30961e-08	Intergenic,Mars2	Intergenic,Promoter
chr1	55239134	55239684	28.095	17.9257	87.3012	99.4474	41.2122	46.4176	48.6028	46.0687	2.00738	2.01024e-05	0.110772	0.8318	Intergenic	Intergenic
chr1	55404424	55404885	20.8912	20.7561	63.2418	46.3744	40.2756	43.931	50.0323	52.979	1.39283	0.0166793	0.289229	0.554642	LOC108167625	Intron
chr1	55410645	55411272	108.778	109.441	28.1839	59.7715	127.383	140.082	37.1668	47.7963	-1.29852	0.00414262	-1.65962	3.37257e-07	LOC108167625	Promoter
chr1	55418963	55419286	4.32231	6.60422	46.744	56.1646	9.36641	6.63109	45.2673	52.4031	3.25885	6.86247e-06	2.61709	2.93133e-05	LOC108167625	Promoter
chr1	55430420	55431045	44.6638	52.8338	13.0608	26.7941	128.32	106.926	32.4019	28.2171	-1.27478	0.0457884	-1.95227	3.84176e-08	Gm6644	Exon
chr1	55436674	55436939	10.0854	10.3781	8.93635	12.3665	36.529	27.3533	8.10046	6.9103	0.0633333	0.958554	-2.08363	0.00254453	Gm6644	Exon
chr1	55442066	55442390	34.5785	30.1907	2.06223	2.06109	73.058	43.931	1.90599	5.75859	-3.97487	3.13627e-05	-3.96806	2.9729e-09	Gm6644	Exon
chr1	55446254	55446623	18.73	20.7561	3.43706	8.75962	40.2756	46.4176	8.57696	3.45515	-1.6716	0.10206	-2.8264	1.85055e-05	Gm6644	Promoter
chr1	55446947	55447258	33.1377	32.0777	8.93635	9.79016	66.5015	51.391	12.8654	9.21374	-1.79795	0.0181817	-2.40686	5.1375e-06	Gm6644	Promoter
chr1	55447762	55448543	46.1046	63.2119	13.0608	22.1567	130.193	135.108	22.8719	25.3378	-1.61827	0.00741747	-2.46307	8.26688e-13	Gm6644	Promoter
chr1	55488248	55488791	32.4173	35.8515	176.665	183.437	104.904	80.402	172.016	146.844	2.40336	1.39738e-12	0.787447	0.00616307	Gm39642	Exon
chr1	55506347	55507519	20.8912	26.4169	270.84	222.597	30.9092	14.0911	205.847	213.068	3.39318	9.90331e-24	3.23704	4.17634e-21	Gm39642,Gm39642	Promoter,Exon
chr1	55525130	55525729	12.2465	20.7561	87.9887	50.4966	14.0496	10.7755	69.5687	47.2204	2.08112	0.000385149	2.24179	5.92654e-05	Gm39642	Promoter
chr1	55574625	55574907	5.76308	5.66076	36.4328	32.9774	7.49313	5.80221	21.9189	17.8516	2.60141	0.00146839	1.58698	0.0678866	Gm39642	Promoter
chr1	55575938	55576327	23.0523	11.3215	39.8699	27.8247	9.36641	20.7222	39.5493	36.855	0.958992	0.202734	1.33383	0.0366936	Gm39642	Promoter
chr1	55666140	55666816	7.92423	20.7561	57.0551	102.539	9.36641	8.28886	98.6351	84.6512	2.51009	2.8284e-05	3.38024	3.39045e-11	Intergenic	Intergenic
chr1	55717309	55717784	31.6969	21.6996	3.43706	3.6069	74.9313	52.2198	7.62397	9.21374	-2.92434	0.00191142	-2.92007	5.23486e-08	Intergenic	Intergenic
chr1	55766776	55767197	5.04269	0.94346	60.4922	59.2562	5.61985	13.2622	72.9042	50.0997	4.23645	9.8874e-08	2.68816	5.77671e-06	Intergenic	Intergenic
chr1	55792767	55793164	7.92423	1.88692	33.6832	41.2217	4.68321	0.828886	22.8719	21.3068	2.88158	0.000813486	3.03958	0.00307836	Intergenic	Intergenic
chr1	55804019	55804233	0.720385	3.77384	16.4979	7.2138	4.68321	3.31555	26.6839	18.4275	2.44644	0.103604	2.50609	0.00652906	Intergenic	Intergenic
chr1	55806611	55807563	33.8581	21.6996	137.482	164.887	29.9725	29.8399	129.607	128.416	2.42967	4.31641e-10	2.10914	2.45519e-09	Intergenic	Intergenic
chr1	55808754	55809046	6.48346	3.77384	32.9957	28.8552	4.68321	8.28886	41.4553	32.8239	2.56874	0.00342373	2.50668	0.00047486	Intergenic	Intergenic
chr1	55821158	55821393	6.48346	4.7173	17.1853	18.5498	4.68321	6.63109	30.0194	21.3068	1.66453	0.115609	2.17684	0.00854691	Intergenic	Intergenic
chr1	56712513	56712624	1.44077	0.94346	10.9986	14.4276	0.936641	4.14443	3.33549	5.18273	3.39417	0.028884	0.722267	0.678424	Intergenic	Intergenic
chr1	56713091	56714023	1.44077	7.54768	197.287	205.593	3.74657	2.48666	154.385	145.692	5.59852	6.23954e-23	5.60523	4.7492e-18	Intergenic	Intergenic
chr1	56971463	56971885	25.9338	12.265	55.6803	46.3744	24.3527	14.92	50.5088	40.886	1.39791	0.0279833	1.22725	0.0299524	Satb2,Satb2,Satb2,Satb2,Satb2,Satb2,9130024F11Rik,Satb2,Satb2	Intron,Intron,Intron,Intron,Promoter,Promoter,Promoter,Promoter,Exon
chr1	56972027	56973876	136.153	109.441	438.568	439.527	158.292	141.74	397.876	350.698	1.83206	2.49055e-17	1.32168	7.69891e-13	Satb2,Satb2,Satb2,Satb2,Satb2,Satb2,9130024F11Rik,Satb2,Satb2	Intron,Intron,Intron,Intron,Promoter,Promoter,Promoter,Promoter,Promoter
chr1	56980036	56980373	12.2465	4.7173	33.6832	44.8286	9.36641	4.97332	24.7779	13.2447	2.18255	0.00498509	1.42116	0.118537	Satb2,Satb2	Promoter,Exon
chr1	57370489	57370786	2.88154	2.83038	41.9321	56.6799	4.68321	1.65777	55.2738	44.917	4.11092	1.17643e-06	4.01363	3.4028e-07	4930558J18Rik	Intron
chr1	57374636	57374825	0	1.88692	17.1853	26.2788	3.74657	5.80221	16.2009	21.3068	4.67739	0.00169069	1.96318	0.0371779	4930558J18Rik	Intron
chr1	57377088	57378582	128.228	137.745	472.252	524.031	177.025	240.377	467.444	436.501	1.90818	4.70101e-21	1.11143	2.31076e-10	4930558J18Rik,4930558J18Rik,1700066M21Rik,1700066M21Rik,1700066M21Rik,4930558J18Rik,Intergenic	Intron,Promoter,Promoter,Promoter,Promoter,Exon,Intergenic
chr1	57394086	57394328	9.365	7.54768	32.3083	45.3439	13.113	4.97332	23.8249	21.3068	2.19408	0.00342574	1.33393	0.107114	Tyw5,Tyw5,Tyw5,Tyw5,Tyw5,Tyw5	Exon,Exon,Exon,Intron,Intron,Intron
chr1	57406024	57407343	85.7258	104.724	407.635	449.317	242.59	205.564	414.077	360.488	2.17694	6.49689e-22	0.792557	6.77023e-06	Tyw5,Tyw5,Tyw5,Tyw5,Tyw5,9430016H08Rik,Tyw5,Tyw5,Tyw5,Tyw5	Intron,Intron,Intron,Promoter,Promoter,Promoter,Promoter,Exon,Exon,Exon
chr1	57428993	57429431	15.8485	11.3215	43.3069	48.4355	32.7824	23.2088	30.4959	41.4618	1.74613	0.00766784	0.362951	0.548148	Intergenic	Intergenic
chr1	57472310	57472503	0	1.88692	21.9972	15.9734	0.936641	3.31555	13.8184	15.5482	4.47188	0.00364754	2.7595	0.0207737	Intergenic	Intergenic
chr1	57574701	57574844	5.76308	6.60422	7.56153	12.8818	0	1.65777	14.2949	14.9723	0.734671	0.569624	4.07736	0.00685468	Intergenic	Intergenic
chr1	57577707	57577791	17.2892	17.9257	0.687411	2.57636	8.42977	10.7755	0.952996	0.575859	-3.37566	0.00719963	-3.63286	0.0149855	Intergenic	Intergenic
chr1	57774018	57775332	67.7162	76.4203	26.1216	28.8552	121.763	138.424	47.1733	39.1584	-1.38661	0.00448207	-1.58923	1.08942e-06	Intergenic,Spats2l,Spats2l,Spats2l,Spats2l,Spats2l,Spats2l,Spats2l,Spats2l,Spats2l	Intergenic,Promoter,Promoter,Promoter,Promoter,Promoter,Promoter,Promoter,Promoter,Promoter
chr1	57839960	57840411	25.9338	33.9646	4.81188	7.72907	44.0221	38.1288	7.14747	14.3965	-2.23765	0.00787162	-1.94367	0.00185113	Spats2l	Promoter
chr1	57906525	57906918	37.46	33.0211	6.1867	4.63744	60.8817	62.1665	7.14747	5.75859	-2.71584	0.000602246	-3.24597	4.32737e-09	Intergenic	Intergenic
chr1	57969268	57970571	164.248	187.749	486	576.074	249.147	309.175	510.806	483.721	1.59768	1.17973e-15	0.830669	8.43431e-08	Kctd18,Kctd18,Kctd18,Kctd18,Kctd18,Kctd18,Kctd18,Kctd18,Kctd18,Kctd18,Kctd18,Kctd18,Intergenic	Intron,Intron,Intron,Intron,Promoter,Promoter,Promoter,Promoter,Exon,Exon,Exon,Exon,Intergenic
chr1	57995568	57996714	154.162	185.862	435.819	498.268	277.246	249.495	452.197	422.68	1.46327	1.9846e-12	0.733992	2.7083e-06	Sgol2a	Promoter
chr1	58030655	58030882	4.32231	10.3781	25.4342	25.2483	0.936641	7.45998	12.3889	10.9413	1.81197	0.0494107	1.45114	0.228606	Aox1,Aox1	Promoter,Promoter
chr1	58031085	58031518	10.0854	13.2084	58.43	59.2562	18.7328	17.4066	28.5899	52.4031	2.34766	9.71867e-05	1.16089	0.059011	Aox1	Promoter
chr1	58112884	58113289	9.365	9.4346	32.9957	26.2788	11.2397	16.5777	22.8719	28.2171	1.65461	0.0416756	0.869861	0.227905	Intergenic,Aox3,Aox3	Intergenic,Promoter,Promoter
chr1	58113521	58113757	4.32231	7.54768	28.8713	18.5498	2.80992	0	25.2544	20.1551	2.01306	0.0374003	4.08139	0.000793958	Aox3,Aox3	Promoter,Promoter
chr1	58170044	58170253	22.3319	16.0388	5.49929	4.63744	21.5428	19.8933	2.38249	4.60687	-1.92956	0.0595208	-2.58494	0.00436019	Aox3	Promoter
chr1	58195286	58195470	18.73	11.3215	0.687411	4.12217	17.7962	21.551	2.38249	5.18273	-2.59938	0.0480043	-2.39938	0.00926141	Intergenic	Intergenic
chr1	58195584	58195850	14.4077	19.8127	13.0608	9.27489	29.9725	43.1021	8.57696	6.9103	-0.616727	0.528754	-2.23571	0.000695074	Intergenic	Intergenic
chr1	58296362	58296841	34.5785	42.4557	60.4922	63.8937	84.2977	94.4931	46.2203	33.9757	0.696423	0.170883	-1.15306	0.00315256	Gm15759	Intron
chr1	58298291	58298445	7.20385	10.3781	4.12447	6.69853	15.9229	21.551	2.38249	0	-0.685366	0.620198	-3.90065	0.000863149	Gm15759	Intron
chr1	58300779	58301518	138.314	136.802	34.3706	31.4316	163.912	174.066	24.3014	21.8826	-2.06666	1.43387e-08	-2.8688	1.29181e-19	Gm15759	Intron
chr1	58311184	58311790	47.5454	54.7207	19.2475	24.733	90.8542	97.8086	34.3079	28.7929	-1.21004	0.0378241	-1.57748	3.7306e-05	Gm15759	Intron
chr1	58343322	58343402	0.720385	0	11.686	6.69853	3.74657	0	6.67097	5.18273	4.50122	0.0422766	1.70028	0.318675	Gm15759	Promoter
chr1	58343877	58344194	2.16115	0.94346	41.9321	45.3439	2.80992	5.80221	26.6839	20.7309	4.75762	3.12e-06	2.44714	0.00630889	Gm15759	Promoter
chr1	58348752	58348982	3.60192	0.94346	21.9972	27.8247	3.74657	1.65777	25.2544	15.5482	3.39516	0.00216819	2.93941	0.00485758	Intergenic	Intergenic
chr1	58359055	58359925	75.6404	38.6819	128.546	175.708	37.4657	36.471	117.695	131.872	1.40119	0.000455688	1.75473	4.3018e-07	Intergenic	Intergenic
chr1	58392009	58394122	314.088	307.568	722.469	801.763	453.334	446.77	645.655	658.782	1.29426	1.11141e-15	0.535251	9.25449e-06	Intergenic,Bzw1,Bzw1	Intergenic,Promoter,Promoter
chr1	58415882	58416400	30.9765	16.9823	72.1782	61.8326	6.55649	29.011	30.9724	28.7929	1.4657	0.00746475	0.736503	0.338288	Clk1	Intron
chr1	58422807	58424402	196.665	192.466	542.368	485.386	218.237	257.784	480.31	439.38	1.39972	2.33398e-13	0.948617	3.04376e-09	Clk1,Clk1,Clk1,Intergenic	Intron,Promoter,Exon,Intergenic
chr1	58482739	58482981	2.88154	2.83038	26.1216	21.6414	3.74657	1.65777	16.2009	7.48616	3.06129	0.00381453	2.15336	0.0828806	Orc2,Orc2,Orc2	Intron,Intron,Intron
chr1	58503872	58505471	237.727	194.353	773.338	794.033	379.34	364.71	630.883	637.476	1.85414	5.48927e-27	0.769945	7.0825e-10	Orc2,Orc2,Orc2,Orc2,Gm15834,Gm15834,Gm15834,Gm15834,Gm15834,Orc2,Orc2,Intergenic	Intron,Intron,Promoter,Promoter,Promoter,Promoter,Promoter,Promoter,Promoter,Exon,Exon,Intergenic
chr1	58585785	58586911	107.337	101.894	360.204	425.614	142.369	138.424	298.764	295.415	1.9089	6.66735e-17	1.08191	3.86366e-08	Fam126b,Fam126b,Fam126b,Fam126b,Fam126b,Fam126b,Ndufb3,Fam126b,Fam126b,Fam126b,Intergenic	Intron,Intron,Intron,Promoter,Promoter,Promoter,Promoter,Exon,Exon,Exon,Intergenic
chr1	58618328	58618586	8.64462	8.49114	25.4342	28.8552	1.87328	4.97332	31.4489	20.1551	1.6644	0.0496227	2.89459	0.0017838	Intergenic	Intergenic
chr1	58651654	58651909	18.73	23.5865	12.3734	12.8818	42.1489	51.391	10.9595	4.60687	-0.740335	0.398349	-2.56822	4.04845e-05	Intergenic,Gm20257	Intergenic,Promoter
chr1	58677501	58677881	20.8912	14.1519	52.9307	37.6148	27.1626	15.7488	25.7309	28.7929	1.3559	0.0377831	0.350546	0.613716	Als2cr12,Als2cr12,Als2cr12,Als2cr12,Als2cr12,Als2cr12,Als2cr12,Als2cr12,Als2cr12	Intron,Intron,Intron,Intron,Intron,Intron,Intron,Intron,Intron
chr1	58711998	58713766	236.286	241.526	640.667	695.101	378.403	369.683	530.342	537.852	1.48433	3.9518e-18	0.514058	0.000130367	Cflar,Cflar,Cflar,Cflar,Cflar,Cflar,Cflar,Cflar,Cflar	Promoter,Promoter,Promoter,Promoter,Promoter,Promoter,Promoter,Promoter,Promoter
chr1	58723534	58724494	41.0619	38.6819	93.4879	88.1114	24.3527	31.4977	95.2996	62.1927	1.18512	0.00597618	1.49463	0.00104911	Cflar	Promoter
chr1	58725504	58726301	54.0288	37.7384	148.481	170.04	29.0359	38.1288	143.902	147.42	1.78614	4.51607e-07	2.11146	3.54538e-10	Cflar	Promoter
chr1	58726827	58728058	103.015	93.4026	266.028	241.147	86.171	69.6265	218.713	190.033	1.36512	1.89279e-07	1.39575	9.67612e-08	Cflar	Promoter
chr1	58734050	58734353	7.20385	8.49114	28.8713	41.737	5.61985	8.28886	28.1134	20.7309	2.17896	0.00562445	1.80736	0.0259657	Cflar	Promoter
chr1	58734583	58734803	5.76308	3.77384	23.372	25.7636	4.68321	8.28886	9.05346	9.7896	2.34955	0.0147899	0.530433	0.647454	Cflar	Promoter
chr1	58742145	58743812	144.797	128.311	692.911	698.193	211.681	211.366	607.535	631.141	2.34473	9.60591e-38	1.54962	1.12968e-28	Cflar	Promoter
chr1	58744785	58745029	1.44077	6.60422	24.0594	24.733	1.87328	2.48666	27.6369	19.5792	2.65454	0.0112733	3.431	0.000918649	Cflar	Promoter
chr1	58761332	58761838	40.3415	60.3815	95.5502	106.146	79.6145	40.6154	93.8701	85.2271	1.01183	0.0168108	0.581911	0.167568	Intergenic	Intergenic
chr1	58770166	58770466	11.5262	14.1519	26.1216	37.6148	9.36641	16.5777	33.3549	32.2481	1.32096	0.0848748	1.32996	0.0467723	Gm39646,Gm39646	Intron,Intron
chr1	58773992	58774319	10.8058	7.54768	42.6195	53.5882	23.416	36.471	46.6968	37.4308	2.37828	0.000474472	0.487291	0.385227	Gm39646,Gm39646	Intron,Intron
chr1	58795036	58796395	96.5315	108.498	249.53	266.395	171.405	169.922	249.685	206.157	1.33493	2.42442e-07	0.419204	0.0647359	Intergenic,Casp8,Casp8	Intergenic,Promoter,Promoter
chr1	58797293	58797938	74.92	85.8549	76.9901	82.4435	196.695	221.313	75.2867	48.948	-0.00873438	0.984791	-1.74425	3.38185e-10	Casp8	Promoter
chr1	58801705	58803503	104.456	104.724	351.955	399.335	219.174	192.302	336.408	388.705	1.84576	6.16876e-16	0.817872	6.13731e-06	Casp8	Promoter
chr1	58830951	58831090	7.92423	10.3781	3.43706	1.54581	14.9863	18.2355	2.85899	0.575859	-1.89633	0.207961	-3.23114	0.0037381	Intergenic	Intergenic
chr1	58859684	58860011	35.2988	40.5688	16.4979	23.1872	47.7687	75.4287	20.4894	14.3965	-0.926294	0.165784	-1.8168	0.000365979	Gm28802	Intron
chr1	58951337	58951508	1.44077	4.7173	17.1853	18.5498	8.42977	4.14443	7.62397	7.48616	2.58284	0.03062	0.273795	0.830707	Trak2,Trak2,Trak2	Intron,Intron,Intron
chr1	58952905	58953365	30.9765	24.53	12.3734	20.0956	60.8817	56.3643	12.3889	17.2758	-0.768265	0.32714	-1.98925	8.21304e-05	Trak2,Trak2,Trak2	Intron,Intron,Intron
chr1	58956282	58956618	17.2892	29.2473	12.3734	26.7941	67.4382	52.2198	17.1539	21.8826	-0.230955	0.795373	-1.61859	0.000939428	Trak2,Trak2,Trak2	Intron,Intron,Intron
chr1	58964098	58964196	12.9669	10.3781	2.74965	4.63744	12.1763	12.4333	0.476498	3.45515	-1.64923	0.202967	-2.68888	0.0302291	Trak2,Trak2,Trak2	Intron,Intron,Intron
chr1	58972892	58974439	223.319	279.264	782.962	878.023	415.869	395.379	690.922	671.451	1.73017	2.04553e-23	0.748881	5.42363e-10	Trak2,Trak2,Trak2,Trak2,Trak2,Trak2,Stradb,Stradb,Trak2,Trak2,Trak2,Intergenic	Intron,Intron,Intron,Promoter,Promoter,Promoter,Promoter,Promoter,Exon,Exon,Exon,Intergenic
chr1	59142900	59143102	5.04269	5.66076	22.6846	24.2178	2.80992	17.4066	26.2074	24.7619	2.13656	0.0260022	1.31598	0.124767	Mpp4,Mpp4	Intron,Intron
chr1	59150613	59150975	22.3319	23.5865	5.49929	6.69853	29.0359	47.2465	7.62397	6.33444	-1.90592	0.0395557	-2.44878	0.000235884	Mpp4,Mpp4	Intron,Intron
chr1	59162782	59163508	134.712	133.971	41.9321	49.4661	153.609	171.58	73.3807	62.7686	-1.55173	1.41509e-05	-1.25448	7.43203e-06	Mpp4,Mpp4,Als2,Als2	Promoter,Exon,Exon,Exon
chr1	59173076	59173323	25.2135	26.4169	2.74965	9.27489	4.68321	10.7755	3.33549	4.60687	-2.07139	0.0283034	-0.97335	0.453365	Als2,Als2,Als2,Als2,Als2,Als2	Intron,Intron,Exon,Exon,Intron,Intron
chr1	59177724	59178431	72.0385	69.8161	14.4356	15.4581	129.257	150.028	19.5364	4.60687	-2.24459	1.64675e-05	-3.5232	0.00036238	Als2,Als2	Intron,Intron
chr1	59180064	59180397	35.2988	36.795	12.3734	3.6069	75.868	62.9954	12.8654	8.06202	-2.20476	0.00703122	-2.71662	6.97836e-08	Als2,Als2,Als2,Als2,Als2,Als2	Intron,Intron,Exon,Exon,Intron,Intron
chr1	59189600	59189824	10.8058	16.9823	1.37482	4.12217	17.7962	38.9577	2.38249	2.87929	-2.30016	0.0752102	-3.44213	8.88338e-05	Als2,Als2	Intron,Intron
chr1	59236562	59238434	232.684	236.809	738.967	763.117	396.199	383.774	653.279	667.996	1.67849	1.36484e-24	0.760666	4.7633e-10	Als2,Als2,Als2,Als2,Als2,Als2,Gm33667,Als2,Als2,Als2,Intergenic	Intron,Intron,Intron,Promoter,Promoter,Promoter,Promoter,Exon,Exon,Exon,Intergenic
chr1	59256547	59257128	30.2562	16.9823	76.9901	72.6533	16.8595	24.0377	33.8314	48.948	1.64703	0.00154004	1.00959	0.0846255	Intergenic,Cdk15,Cdk15,Cdk15,Cdk15,Cdk15	Intergenic,Promoter,Promoter,Promoter,Promoter,Promoter
chr1	59314985	59315769	20.8912	26.4169	116.173	115.936	9.36641	15.7488	75.2867	61.041	2.30353	4.54325e-08	2.43104	3.80443e-06	Cdk15	Promoter
chr1	59316001	59317100	20.8912	11.3215	220.659	231.357	29.9725	28.1821	178.687	198.095	3.77805	7.57493e-24	2.69654	1.06615e-17	Cdk15	Promoter
chr1	59319897	59320014	2.88154	1.88692	9.62376	8.24435	1.87328	1.65777	13.3419	14.3965	1.88966	0.22206	2.97645	0.0170918	Intergenic	Intergenic
chr1	59444236	59444624	3.60192	2.83038	30.2461	56.6799	0.936641	4.14443	20.9659	20.1551	3.74725	1.79233e-05	2.98479	0.00439853	Intergenic	Intergenic
chr1	59464774	59465065	7.92423	13.2084	32.3083	17.5192	0.936641	4.14443	13.3419	19.0033	1.24421	0.163281	2.63864	0.0200762	Intergenic	Intergenic
chr1	59479976	59480112	1.44077	7.54768	6.1867	15.4581	0.936641	2.48666	13.8184	15.5482	1.30946	0.361927	3.07548	0.0133505	Intergenic	Intergenic
chr1	59481205	59483120	345.064	400.027	735.53	857.412	550.745	569.445	676.627	663.965	1.09975	4.84626e-11	0.258927	0.0303734	Intergenic,Fzd7	Intergenic,Promoter
chr1	59483625	59484028	19.4504	18.8692	42.6195	48.9508	10.3031	19.0644	30.0194	33.3998	1.25748	0.0431003	1.10131	0.100582	Fzd7	Promoter
chr1	59584179	59584942	16.5688	10.3781	43.9943	71.1075	47.7687	24.0377	40.9788	43.1894	2.08358	0.000897057	0.235286	0.689068	Gm39648	Exon
chr1	59593379	59594033	12.9669	12.265	66.6789	72.6533	13.113	12.4333	75.2867	63.9203	2.46371	9.24122e-06	2.44831	1.54476e-06	Gm39648,Gm39648	Exon,Exon
chr1	59608086	59608760	64.8346	61.3249	135.42	125.726	135.813	107.755	130.56	119.779	1.04745	0.0031111	0.0427209	0.898285	Gm973	Promoter
chr1	59669928	59671329	165.688	129.254	347.83	344.717	201.378	185.671	349.749	355.881	1.22594	1.25817e-07	0.867379	7.77937e-07	Sumo1,Sumo1,Sumo1,Intergenic	Intron,Promoter,Exon,Intergenic
chr1	59673661	59674182	55.4696	64.1553	9.62376	9.27489	118.953	94.4931	15.2479	10.3655	-2.66196	7.2042e-06	-3.04634	6.53773e-13	Intergenic	Intergenic
chr1	59684536	59685663	95.0908	122.65	323.771	297.312	164.849	115.215	269.221	304.629	1.51785	1.14882e-09	1.03837	3.86849e-06	Intergenic,Nop58,Nop58	Intergenic,Promoter,Promoter
chr1	59762589	59764977	316.249	377.384	796.022	719.834	325.951	376.314	621.83	635.748	1.13032	1.7789e-11	0.838445	1.83597e-10	Intergenic,Bmpr2,Bmpr2	Intergenic,Promoter,Promoter
chr1	59844813	59845247	33.8581	49.0599	5.49929	0	77.7412	77.9153	0.476498	5.18273	-3.93489	0.108715	-4.80898	0.000293208	Intergenic	Intergenic
chr1	59883824	59884049	11.5262	6.60422	32.9957	29.3705	11.2397	13.2622	14.2949	18.4275	1.76406	0.029857	0.412716	0.637114	Intergenic	Intergenic
chr1	59886946	59887122	19.4504	20.7561	7.56153	8.75962	15.9229	19.0644	4.76498	2.30343	-1.29631	0.168014	-2.29132	0.01756	Intergenic	Intergenic
chr1	59895399	59895779	8.64462	4.7173	26.809	42.2523	22.4794	15.7488	40.5023	35.7032	2.35155	0.00456415	1.00133	0.0920504	Intergenic	Intergenic
chr1	59907192	59907470	8.64462	1.88692	36.4328	26.2788	7.49313	13.2622	30.4959	24.1861	2.52373	0.00641548	1.39052	0.0600083	Intergenic	Intergenic
chr1	59907739	59908185	20.8912	9.4346	58.43	56.6799	15.9229	28.1821	45.7438	24.7619	1.90096	0.00209066	0.675162	0.303074	Intergenic	Intergenic
chr1	59912396	59914611	288.874	331.155	1200.91	1338.68	421.489	478.268	1137.4	1087.8	2.03802	3.20222e-43	1.30477	3.30117e-35	Intergenic,Fam117b	Intergenic,Promoter
chr1	59914946	59915221	23.7727	14.1519	30.2461	22.6719	2.80992	0.828886	20.0129	15.5482	0.467042	0.558301	3.32157	0.0049243	Fam117b	Promoter
chr1	59915916	59916227	12.9669	8.49114	34.3706	35.5537	17.7962	10.7755	33.3549	35.7032	1.69161	0.0247831	1.2803	0.0473283	Fam117b	Promoter
chr1	60000314	60000594	5.76308	6.60422	37.1202	27.3094	6.55649	14.0911	30.0194	29.9446	2.38384	0.00449596	1.52621	0.0346922	Ica1l,Ica1l,Ica1l,Ica1l,Ica1l,Ica1l,Ica1l	Intron,Intron,Intron,Intron,Intron,Intron,Intron
chr1	60007434	60007874	26.6542	22.6431	3.43706	5.66799	37.4657	51.391	16.2009	14.3965	-2.42137	0.0101614	-1.53832	0.00616985	Ica1l,Ica1l,Ica1l,Ica1l,Ica1l,Ica1l,Ica1l,Ica1l,Ica1l,Ica1l,Ica1l,Ica1l,Ica1l,Ica1l	Intron,Intron,Intron,Intron,Intron,Intron,Intron,Exon,Exon,Exon,Exon,Exon,Exon,Exon
chr1	60015878	60017692	260.779	188.692	151.918	156.643	698.734	713.671	170.586	143.965	-0.546183	0.0561466	-2.16309	6.12707e-54	Ica1l,Ica1l,Ica1l,Ica1l,Ica1l,Ica1l,Ica1l,Ica1l,Ica1l	Intron,Intron,Intron,Intron,Intron,Intron,Intron,Promoter,Exon
chr1	60097035	60098852	288.154	277.377	905.321	839.377	389.643	358.908	775.262	761.285	1.62385	2.29032e-25	1.03891	1.23681e-18	Wdr12,Wdr12,Wdr12,Wdr12,Wdr12,Wdr12,Wdr12,Wdr12,Wdr12,Carf,Carf,Carf,Wdr12,Wdr12,Wdr12,Wdr12,Wdr12,Wdr12,Wdr12,Wdr12,Wdr12,Wdr12,Wdr12,Wdr12,Wdr12,Wdr12	Intron,Intron,Intron,Intron,Intron,Promoter,Promoter,Promoter,Promoter,Promoter,Promoter,Promoter,Promoter,Exon,Exon,Exon,Exon,Exon,Intron,Intron,Intron,Intron,Exon,Exon,Exon,Exon
chr1	60158253	60159045	61.9531	53.7772	144.356	135.516	178.899	116.044	131.037	90.9857	1.26968	0.000271672	-0.403746	0.225098	Intergenic	Intergenic
chr1	60179944	60181308	311.206	357.572	1192.66	1307.76	462.701	490.701	1158.84	1083.19	1.90624	7.39983e-39	1.2333	1.46553e-33	Nbeal1,Nbeal1,Nbeal1,Nbeal1,Nbeal1,Nbeal1	Promoter,Promoter,Promoter,Promoter,Promoter,Promoter
chr1	60236425	60236530	2.16115	2.83038	1.37482	6.18326	18.7328	13.2622	2.85899	3.45515	0.620327	0.77478	-2.34357	0.0191259	Nbeal1	Promoter
chr1	60342656	60344187	231.964	267.943	695.66	820.312	426.172	405.325	776.692	708.882	1.6047	6.40887e-20	0.838717	2.50662e-12	Intergenic,Cyp20a1,Cyp20a1	Intergenic,Promoter,Promoter
chr1	60410457	60410780	10.0854	7.54768	33.6832	21.1261	5.61985	6.63109	23.3484	17.8516	1.62295	0.0597586	1.74877	0.0447269	Abi2,Abi2	Promoter,Promoter
chr1	60416774	60417141	24.4931	25.4734	10.9986	6.18326	57.1351	62.9954	11.436	9.21374	-1.55372	0.0759937	-2.53537	1.05047e-06	Abi2,Abi2	Promoter,Promoter
chr1	60447135	60447405	31.6969	24.53	16.4979	20.0956	48.7054	36.471	14.2949	24.1861	-0.620069	0.412379	-1.15174	0.0464233	Raph1	Exon
chr1	60565192	60567562	231.243	198.127	674.351	744.567	308.155	271.875	518.43	561.462	1.72145	1.73263e-22	0.897711	4.25252e-10	Raph1,Raph1,Raph1,Raph1,Raph1,Raph1,Raph1,Raph1,Raph1,Raph1,Raph1,Raph1,Raph1,Raph1,Raph1,Intergenic	Intron,Intron,Intron,Intron,Intron,Promoter,Promoter,Promoter,Promoter,Promoter,Exon,Exon,Exon,Exon,Exon,Intergenic
chr1	60579560	60580393	18.0096	14.1519	91.4257	110.268	14.0496	33.1555	74.3337	98.4718	2.64027	2.54658e-08	1.85836	0.000100975	Intergenic	Intergenic
chr1	60599020	60599201	2.88154	10.3781	24.0594	13.3971	3.74657	1.65777	24.3014	14.3965	1.52359	0.16488	2.86286	0.00701967	Gm38388,Gm38388,Gm38388,Gm38388	Promoter,Promoter,Intron,Intron
chr1	60621865	60622112	18.0096	13.2084	28.8713	26.7941	5.61985	4.14443	11.9124	29.9446	0.826315	0.287932	2.10001	0.0278597	Intergenic	Intergenic
chr1	60622887	60623185	12.2465	11.3215	48.8062	39.6759	9.36641	9.11775	23.3484	34.5515	1.90387	0.00469662	1.64478	0.024708	Intergenic	Intergenic
chr1	60658407	60658787	4.32231	6.60422	47.4314	43.2828	12.1763	17.4066	54.7973	29.3688	3.07359	4.58413e-05	1.5072	0.0169114	Intergenic	Intergenic
chr1	60669122	60669504	13.6873	13.2084	38.495	45.8592	4.68321	5.80221	26.2074	39.1584	1.64975	0.0142291	2.63251	0.000731727	Intergenic	Intergenic
chr1	60677342	60677740	51.1473	37.7384	9.62376	4.12217	57.1351	44.7599	10.9595	10.3655	-2.72575	0.000208352	-2.25341	4.51565e-05	Intergenic	Intergenic
chr1	60681239	60681517	18.0096	35.8515	5.49929	8.24435	44.9588	33.1555	11.9124	9.7896	-1.95182	0.0295512	-1.84146	0.00271023	Intergenic	Intergenic
chr1	60702725	60703015	21.6115	13.2084	3.43706	17.004	53.3886	31.4977	15.7244	13.2447	-0.754419	0.496858	-1.54428	0.00917809	Intergenic	Intergenic
chr1	60744170	60744622	36.0192	51.8903	18.5601	15.4581	63.6916	43.1021	9.05346	8.63788	-1.36926	0.0337869	-2.58992	4.6652e-06	Intergenic	Intergenic
chr1	60749761	60750368	30.2562	40.5688	24.0594	13.3971	58.0718	67.9687	18.1069	21.8826	-0.92578	0.195641	-1.66096	0.000432203	Cd28	Promoter
chr1	60754108	60754345	16.5688	16.9823	3.43706	9.27489	28.0992	21.551	8.10046	5.75859	-1.37921	0.204395	-1.83182	0.0174295	Cd28	Promoter
chr1	60755434	60756237	51.1473	56.6076	49.4936	60.802	152.673	184.842	49.5558	59.8893	0.0383186	0.944296	-1.62939	1.6675e-08	Cd28	Promoter
chr1	60758043	60759151	47.5454	40.5688	36.4328	50.4966	144.243	128.477	32.8784	44.917	-0.0177007	0.977276	-1.81467	4.08714e-08	Cd28	Promoter
chr1	60759432	60760365	92.2092	85.8549	27.4965	26.2788	143.306	155.831	42.8848	51.8273	-1.72949	9.94142e-05	-1.66326	4.0997e-08	Cd28	Promoter
chr1	60760532	60760815	12.2465	22.6431	8.93635	1.54581	37.4657	28.1821	4.28848	1.72758	-1.76179	0.137623	-3.41658	1.95481e-05	Intergenic	Intergenic
chr1	60761550	60762083	44.6638	37.7384	32.3083	38.1301	72.1214	81.2309	26.6839	43.7653	-0.226568	0.713329	-1.12972	0.00966238	Intergenic	Intergenic
chr1	60764957	60765519	92.9296	101.894	10.9986	5.66799	141.433	188.157	10.483	3.45515	-3.57872	8.52924e-12	-4.54383	1.94552e-10	Intergenic	Intergenic
chr1	60765754	60765954	14.4077	17.9257	2.74965	4.12217	24.3527	23.2088	2.85899	0	-2.21832	0.0538154	-3.97892	0.000157409	Intergenic	Intergenic
chr1	60767168	60767819	57.6308	43.3992	1.37482	7.2138	59.945	78.7442	7.14747	2.30343	-3.49799	5.892e-06	-3.8393	1.09859e-10	Intergenic	Intergenic
chr1	60768016	60768131	5.04269	4.7173	2.74965	4.63744	10.3031	20.7222	1.90599	0	-0.394031	0.828662	-3.95123	0.00242519	Intergenic	Intergenic
chr1	60771711	60772626	71.3181	66.0422	15.1231	21.1261	161.102	206.393	39.5493	33.9757	-1.9135	0.000274136	-2.31955	5.0896e-15	Intergenic	Intergenic
chr1	60774505	60774753	15.1281	16.9823	6.87411	1.03054	33.7191	20.7222	2.38249	6.33444	-2.06197	0.0961372	-2.66394	0.00135686	Intergenic	Intergenic
chr1	60776720	60777685	74.1996	87.7418	30.9335	43.7981	188.265	162.462	46.2203	47.2204	-1.10671	0.0178245	-1.90762	1.53236e-11	Intergenic,2310016D23Rik	Intergenic,Promoter
chr1	60781786	60782036	8.64462	7.54768	2.74965	6.18326	30.9092	23.2088	6.19447	5.18273	-0.84503	0.565214	-2.24348	0.0032096	2310016D23Rik	Promoter
chr1	60793807	60794085	20.1708	21.6996	0.687411	8.24435	26.226	33.1555	11.436	10.9413	-2.18461	0.0567106	-1.40909	0.0362678	Intergenic	Intergenic
chr1	60803864	60804311	3.60192	5.66076	31.6209	34.5232	4.68321	9.94664	32.8784	40.886	2.85781	0.00100888	2.31756	0.00110313	Intergenic	Intergenic
chr1	60805153	60805892	51.8677	52.8338	13.7482	21.6414	75.868	82.8886	7.14747	10.3655	-1.55383	0.00943335	-3.19285	6.26938e-11	Intergenic	Intergenic
chr1	60833643	60834050	35.2988	32.0777	10.9986	21.6414	66.5015	59.6798	22.8719	18.4275	-1.03428	0.162174	-1.60649	0.000623185	Intergenic	Intergenic
chr1	60852186	60852703	12.2465	17.9257	81.802	64.4089	8.42977	9.94664	69.5687	57.5859	2.28875	2.72243e-05	2.78789	6.41828e-07	Intergenic	Intergenic
chr1	60853255	60853721	23.7727	24.53	19.2475	11.336	80.5512	74.5998	23.8249	16.6999	-0.668176	0.421511	-1.92916	1.23515e-05	Intergenic	Intergenic
chr1	60854113	60854624	13.6873	16.0388	39.8699	43.7981	23.416	38.9577	46.6968	29.9446	1.49863	0.0244531	0.295913	0.629457	Intergenic	Intergenic
chr1	60859913	60860207	11.5262	8.49114	42.6195	32.4621	10.3031	12.4333	14.2949	31.0964	1.8945	0.0106415	0.989056	0.223296	Intergenic,Gm38137	Intergenic,Promoter
chr1	60860600	60860944	13.6873	17.9257	38.495	60.802	20.6061	19.8933	22.8719	29.3688	1.66331	0.00951684	0.365178	0.597338	Intergenic,Gm38137	Intergenic,Promoter
chr1	60865227	60865506	5.04269	5.66076	31.6209	36.069	7.49313	4.14443	27.6369	33.9757	2.66718	0.00141451	2.41581	0.00189378	Gm38137,Gm38137	Promoter,Promoter
chr1	60874885	60876189	182.978	154.728	60.4922	59.7715	392.453	356.421	64.3272	69.103	-1.49186	2.86552e-06	-2.48984	6.57516e-36	Gm38137	Promoter
chr1	60876329	60876452	7.20385	15.0954	0	2.57636	10.3031	18.2355	1.90599	4.03101	-3.0294	0.0652062	-2.28707	0.0339821	Gm38137	Promoter
chr1	60880093	60880569	24.4931	20.7561	8.24894	5.15272	67.4382	82.0598	9.05346	13.2447	-1.77041	0.0575501	-2.75679	1.29299e-08	Gm39650	Promoter
chr1	60881142	60881468	16.5688	2.83038	5.49929	4.63744	41.2122	33.1555	5.71798	3.45515	-0.957069	0.508849	-3.00241	2.0338e-05	Gm39650	Promoter
chr1	60886757	60887429	10.0854	21.6996	10.3112	3.09163	63.6916	82.0598	13.3419	9.21374	-1.25888	0.27671	-2.6838	4.31155e-08	Gm39650	Promoter
chr1	60888913	60889220	16.5688	19.8127	8.24894	2.57636	59.945	44.7599	3.33549	6.33444	-1.7742	0.103505	-3.45671	4.8422e-08	Gm39650	Promoter
chr1	60898542	60900148	248.533	203.787	175.977	149.944	424.299	392.892	161.056	157.785	-0.477684	0.0838232	-1.35684	3.68057e-16	Intergenic	Intergenic
chr1	60907614	60907739	6.48346	13.2084	1.37482	1.54581	15.9229	13.2622	2.85899	1.72758	-2.74062	0.0817759	-2.65395	0.0140988	Intergenic	Intergenic
chr1	60908547	60909388	100.854	125.48	30.9335	39.6759	261.323	325.752	48.6028	51.2514	-1.6719	3.533e-05	-2.55834	2.37819e-27	Intergenic,Ctla4	Intergenic,Promoter
chr1	60909774	60909924	6.48346	8.49114	0.687411	0	18.7328	10.7755	1.42949	1.72758	-4.61291	0.0468227	-3.2273	0.00523402	Ctla4	Promoter
chr1	60910863	60911139	37.46	32.0777	8.24894	9.79016	41.2122	39.7866	10.483	7.48616	-1.94349	0.00931911	-2.1643	0.000437766	Ctla4	Promoter
chr1	60911253	60914346	349.387	360.402	228.221	252.998	681.875	654.82	262.074	232.071	-0.558755	0.00928328	-1.43319	1.40272e-27	Ctla4	Promoter
chr1	60915866	60918438	205.31	194.353	151.918	132.94	676.255	668.083	134.849	127.265	-0.491396	0.0810739	-2.35703	1.38473e-62	Intergenic	Intergenic
chr1	60918546	60918696	10.0854	15.0954	12.3734	9.27489	23.416	19.0644	8.57696	5.18273	-0.215738	0.848983	-1.61517	0.0496407	Intergenic	Intergenic
chr1	60919902	60920368	15.8485	23.5865	13.7482	11.336	51.5153	48.9043	11.9124	11.5172	-0.650155	0.476368	-2.09847	0.000110749	Intergenic,Gm34649,Gm34649	Intergenic,Promoter,Promoter
chr1	60920480	60920860	50.4269	34.908	29.5587	36.069	69.3115	76.2576	24.3014	35.1274	-0.381342	0.535347	-1.2989	0.00301962	Intergenic,Gm34649,Gm34649,Gm34649	Intergenic,Promoter,Promoter,Promoter
chr1	60930352	60930894	75.6404	62.2684	8.93635	17.004	141.433	126.82	4.76498	5.18273	-2.39258	2.31744e-05	-4.75651	8.7837e-24	Gm34649	Promoter
chr1	60939895	60940377	32.4173	36.795	13.7482	24.2178	52.4519	71.2842	21.9189	20.7309	-0.854444	0.23078	-1.53793	0.00126109	Intergenic	Intergenic
chr1	60940484	60942278	105.897	114.159	139.545	141.7	328.761	320.779	135.802	116.323	0.35559	0.281187	-1.36248	1.57073e-12	Intergenic	Intergenic
chr1	60975142	60975437	20.1708	16.0388	4.12447	8.75962	31.8458	48.0754	4.76498	5.75859	-1.47649	0.155371	-2.93333	1.45704e-05	Icos	Promoter
chr1	60977495	60978053	47.5454	58.4946	15.1231	18.5498	95.5374	90.3486	17.1539	16.124	-1.64709	0.00518804	-2.47981	1.9923e-09	Icos	Promoter
chr1	60979141	60979414	20.8912	9.4346	4.81188	4.12217	20.6061	29.011	8.10046	8.63788	-1.77648	0.128262	-1.57163	0.0363376	Icos	Promoter
chr1	60980584	60980846	11.5262	6.60422	1.37482	2.57636	21.5428	20.7222	2.38249	0	-2.18471	0.160801	-4.06853	0.000287105	Icos	Promoter
chr1	60983105	60983249	18.0096	16.9823	4.81188	4.12217	10.3031	26.5244	0.952996	2.30343	-1.97514	0.0651466	-3.53463	0.00154695	Icos	Promoter
chr1	60985030	60985429	13.6873	7.54768	11.686	1.03054	44.0221	43.1021	1.90599	7.48616	-0.771052	0.597889	-3.25059	4.34937e-06	Icos	Promoter
chr1	60985558	60985708	3.60192	3.77384	2.06223	0.515272	14.9863	19.0644	1.42949	1.72758	-1.54863	0.503416	-3.43977	0.00165367	Icos	Promoter
chr1	60985900	60986085	8.64462	5.66076	6.87411	5.66799	19.6695	23.2088	8.10046	2.87929	-0.200328	0.892936	-1.94704	0.025748	Icos	Promoter
chr1	61003057	61003418	25.2135	23.5865	4.81188	6.69853	42.1489	24.8666	8.10046	2.30343	-2.07447	0.0231408	-2.65734	0.000632644	Intergenic	Intergenic
chr1	61022703	61023340	62.6735	83.0245	14.4356	15.9734	121.763	174.895	18.5834	9.7896	-2.25398	1.69551e-05	-3.36976	1.82819e-17	Intergenic	Intergenic
chr1	61026698	61027468	82.8442	73.5899	16.4979	13.9123	118.017	131.793	15.2479	23.0343	-2.37013	2.47788e-06	-2.71743	6.05604e-13	Intergenic	Intergenic
chr1	61027597	61027747	6.48346	16.9823	2.74965	0	15.9229	17.4066	1.90599	2.30343	-3.16875	0.0561562	-2.99198	0.00411064	Intergenic	Intergenic
chr1	61029918	61030115	14.4077	4.7173	6.87411	2.57636	32.7824	24.0377	7.62397	4.03101	-1.04767	0.46607	-2.26865	0.00291821	Intergenic	Intergenic
chr1	61039326	61039715	51.1473	74.5334	23.372	27.3094	75.868	93.6642	24.3014	25.9136	-1.30216	0.0155603	-1.75811	1.92436e-05	Intergenic	Intergenic
chr1	61039995	61040168	8.64462	17.9257	0	4.63744	17.7962	22.3799	2.85899	2.30343	-2.45504	0.101295	-2.95495	0.0018314	Intergenic	Intergenic
chr1	61045854	61046739	121.025	100.95	19.9349	26.2788	257.576	187.328	34.7843	44.3411	-2.25735	1.01103e-07	-2.49495	1.77507e-18	Intergenic	Intergenic
chr1	61049590	61049967	15.8485	25.4734	2.06223	6.18326	55.2618	47.2465	10.9595	9.7896	-2.28894	0.0322131	-2.30073	2.88702e-05	Intergenic	Intergenic
chr1	61050162	61050962	67.7162	72.6465	43.9943	53.5882	222.921	208.879	54.7973	40.3101	-0.520069	0.270394	-2.17579	4.71601e-16	Intergenic	Intergenic
chr1	61054333	61055094	109.498	118.876	47.4314	38.1301	152.673	148.371	47.6498	44.3411	-1.42035	0.000255431	-1.70881	1.02356e-08	Intergenic	Intergenic
chr1	61055249	61055455	14.4077	3.77384	10.3112	21.1261	17.7962	33.9843	9.05346	5.18273	0.774183	0.498602	-1.85655	0.0188005	Intergenic	Intergenic
chr1	61084861	61085029	12.9669	5.66076	2.06223	7.2138	23.416	14.0911	6.67097	3.45515	-0.995195	0.49359	-1.87222	0.0404465	Intergenic	Intergenic
chr1	61139769	61140152	18.73	19.8127	10.9986	9.27489	33.7191	43.931	14.7714	16.124	-0.929545	0.317773	-1.33323	0.0231672	Intergenic	Intergenic
chr1	61146113	61146428	4.32231	0	49.4936	52.5577	5.61985	6.63109	28.5899	35.1274	4.43525	1.06873e-06	2.37367	0.001607	Intergenic	Intergenic
chr1	61157928	61158041	8.64462	5.66076	1.37482	0.515272	10.3031	17.4066	3.33549	0.575859	-2.96564	0.117487	-2.78849	0.0186713	Intergenic	Intergenic
chr1	61158350	61158555	10.8058	16.9823	3.43706	1.54581	22.4794	25.6955	6.19447	5.18273	-2.50235	0.0535484	-2.07897	0.00853845	Intergenic	Intergenic
chr1	61203181	61203495	36.7396	29.2473	10.9986	2.06109	36.529	51.391	10.9595	8.06202	-2.37876	0.0085805	-2.20388	0.000254024	Intergenic	Intergenic
chr1	61422551	61422910	13.6873	12.265	17.1853	10.8207	58.0718	48.9043	12.3889	21.8826	0.101263	0.925128	-1.65088	0.00200188	Intergenic	Intergenic
chr1	61423237	61423719	30.9765	31.1342	12.3734	16.4887	88.9809	115.215	24.3014	38.5825	-1.09948	0.139594	-1.70838	1.80616e-05	Intergenic	Intergenic
chr1	61690760	61690925	2.88154	2.83038	17.1853	17.5192	1.87328	1.65777	17.1539	20.1551	2.60247	0.0279149	3.40382	0.00321587	Pard3b	Promoter
chr1	61709916	61710138	0.720385	0.94346	18.5601	13.9123	0	1.65777	18.1069	23.6102	4.30259	0.0066911	4.5831	0.00111086	Pard3b	Promoter
chr1	62051575	62051689	2.16115	4.7173	9.62376	15.4581	0	0.828886	8.10046	12.6689	1.89632	0.151816	4.56446	0.0210477	Pard3bos2	Exon
chr1	62200790	62201459	16.5688	16.0388	142.294	123.15	20.6061	29.011	122.936	138.206	3.02237	1.63296e-12	2.3882	1.54993e-10	Pard3bos2	Promoter
chr1	62229181	62229549	6.48346	2.83038	32.3083	41.737	3.74657	0.828886	23.8249	29.3688	2.95693	0.000471	3.57588	0.000404706	Pard3bos2	Promoter
chr1	62282938	62283182	8.64462	9.4346	27.4965	18.5498	0	2.48666	27.1604	33.9757	1.34703	0.137254	4.55081	7.23802e-05	Pard3bos2	Promoter
chr1	62283384	62284253	12.2465	9.4346	136.107	141.7	10.3031	9.11775	143.426	126.113	3.66508	1.07641e-15	3.79924	3.81692e-17	Pard3bos2	Promoter
chr1	62392995	62393145	1.44077	0.94346	10.3112	14.4276	0	0.828886	12.8654	16.124	3.35543	0.0324422	5.0456	0.00704076	Gm34881	Exon
chr1	62437171	62437389	26.6542	24.53	5.49929	2.57636	26.226	27.3533	6.67097	4.60687	-2.69326	0.0047283	-2.23949	0.00335645	Gm34881	Exon
chr1	62437652	62438004	59.0715	39.6253	2.74965	3.09163	42.1489	40.6154	4.76498	11.5172	-4.07552	2.12923e-07	-2.36495	0.000284475	Gm34881	Exon
chr1	62483037	62483506	10.0854	2.83038	81.802	117.997	7.49313	2.48666	110.071	124.961	3.89212	7.39982e-11	4.59161	1.75379e-15	Gm34881	Exon
chr1	62545878	62546021	5.04269	6.60422	2.74965	2.06109	16.8595	12.4333	3.81198	1.15172	-1.27872	0.469362	-2.53044	0.0212852	Gm34881	Promoter
chr1	62622096	62622303	18.73	31.1342	8.24894	6.18326	8.42977	24.0377	5.71798	10.3655	-1.79049	0.046456	-1.02884	0.286148	Intergenic	Intergenic
chr1	62639090	62639371	13.6873	9.4346	2.74965	8.24435	32.7824	47.2465	11.436	7.48616	-1.05759	0.410113	-2.07389	0.000996556	Intergenic	Intergenic
chr1	62678626	62679341	10.8058	10.3781	149.856	204.563	10.3031	5.80221	171.063	176.789	4.06413	4.43255e-20	4.45165	7.03732e-23	Intergenic	Intergenic
chr1	62679469	62679880	10.0854	10.3781	90.7383	100.478	5.61985	6.63109	84.3401	75.4375	3.22641	4.52199e-10	3.70084	1.37156e-10	Intergenic	Intergenic
chr1	62696875	62697274	8.64462	4.7173	36.4328	42.2523	1.87328	4.14443	27.1604	35.1274	2.53521	0.00104921	3.34899	0.000167086	Intergenic	Intergenic
chr1	62701085	62701557	10.8058	13.2084	58.43	97.3863	18.7328	19.0644	55.7503	68.5272	2.70996	1.81066e-06	1.71539	0.000550769	Intergenic	Intergenic
chr1	62702747	62704427	85.0054	81.1376	302.461	366.873	98.3473	105.269	269.698	246.467	2.0104	7.63257e-16	1.34162	1.59779e-09	Intergenic,Nrp2,Nrp2	Intergenic,Promoter,Promoter
chr1	62705323	62707868	88.6073	79.2507	340.269	424.584	127.383	117.702	225.384	251.074	2.18606	2.76018e-19	0.959255	1.89732e-05	Nrp2,Nrp2	Promoter,Promoter
chr1	62715071	62715365	0.720385	1.88692	43.3069	55.1341	1.87328	11.6044	32.4019	25.3378	5.31249	1.04714e-06	2.07537	0.0137752	Gm29083,Gm29083	Exon,Intron
chr1	62718012	62718483	16.5688	13.2084	46.0566	32.4621	18.7328	25.6955	21.4424	15.5482	1.38902	0.0459665	-0.263684	0.727645	Gm29083,Gm29083	Promoter,Exon
chr1	62719637	62722851	91.4888	75.4768	725.219	757.964	69.3115	55.5354	569.892	560.886	3.14306	9.46983e-58	3.18516	3.07701e-63	Gm29083	Promoter
chr1	62724407	62725367	17.2892	28.3038	122.359	127.272	16.8595	6.63109	122.936	114.596	2.47191	6.11776e-09	3.36114	4.38871e-13	Gm29083	Promoter
chr1	62729123	62729319	3.60192	2.83038	19.2475	18.5498	3.74657	2.48666	16.6774	13.8206	2.54424	0.0238862	2.30114	0.0336487	Gm29083	Promoter
chr1	62736329	62736908	12.9669	27.3604	77.6775	59.7715	19.6695	15.7488	68.1392	77.1651	1.78742	0.00168071	2.03994	1.79593e-05	Gm29083	Promoter
chr1	62743091	62743790	9.365	15.0954	92.1131	98.9321	6.55649	6.63109	23.8249	21.8826	2.98815	4.54578e-09	1.79371	0.0297154	Gm29083	Promoter
chr1	62750477	62750902	12.2465	22.6431	37.8076	61.8326	51.5153	25.6955	53.8443	50.0997	1.53398	0.0195709	0.436356	0.411776	Gm29083	Promoter
chr1	62751071	62751624	14.4077	8.49114	43.3069	59.2562	29.0359	21.551	68.1392	40.3101	2.1479	0.00107348	1.10769	0.0379145	Gm29083	Promoter
chr1	62760153	62760461	7.92423	12.265	29.5587	44.8286	2.80992	22.3799	28.1134	25.9136	1.89933	0.0121783	1.09434	0.453365	4930487H11Rik	Exon
chr1	62763868	62764097	6.48346	0.94346	26.809	22.1567	2.80992	0.828886	8.57696	23.0343	2.66076	0.0125359	3.14196	0.0130162	4930487H11Rik	Exon
chr1	62766721	62767221	7.20385	16.0388	45.3692	45.8592	14.9863	16.5777	30.9724	29.9446	1.99803	0.00407802	0.947408	0.145989	4930487H11Rik	Exon
chr1	62770626	62770997	14.4077	8.49114	32.9957	41.2217	6.55649	9.94664	45.7438	33.9757	1.683	0.023006	2.26567	0.000743887	4930487H11Rik	Exon
chr1	62774336	62774625	7.92423	4.7173	27.4965	28.3399	3.74657	13.2622	13.8184	27.6412	2.12488	0.0162911	1.2658	0.166503	4930487H11Rik	Exon
chr1	62795632	62796165	26.6542	32.0777	24.7468	29.3705	49.642	74.5998	30.4959	21.8826	-0.1122	0.879136	-1.24415	0.0103426	4930487H11Rik	Promoter
chr1	62822839	62823078	17.2892	12.265	4.81188	14.9429	31.8458	19.0644	8.10046	3.45515	-0.569756	0.610433	-2.11871	0.00971567	Gm4208,Gm4208,Gm4208,Gm4208,Gm4208	Intron,Intron,Promoter,Exon,Exon
chr1	62829707	62830290	29.5358	34.908	17.1853	25.7636	73.9947	87.0331	18.1069	23.0343	-0.576032	0.419341	-1.97477	4.71833e-06	Gm4208	Intron
chr1	62875212	62876431	169.29	181.144	85.239	128.818	550.745	547.065	123.889	162.392	-0.704463	0.032593	-1.94422	2.23433e-32	Intergenic	Intergenic
chr1	62876842	62876989	3.60192	11.3215	6.87411	5.66799	15.9229	18.2355	4.76498	4.03101	-0.236494	0.876237	-1.95457	0.0352854	Intergenic	Intergenic
chr1	62986349	62986589	5.76308	6.60422	24.7468	25.2483	11.2397	9.11775	17.1539	27.0654	2.02037	0.027537	1.11846	0.161296	Intergenic	Intergenic
chr1	63001984	63002184	12.2465	7.54768	2.06223	0.515272	17.7962	30.6688	6.67097	1.72758	-2.9992	0.0663215	-2.50413	0.00508774	Intergenic	Intergenic
chr1	63110945	63111172	5.04269	6.60422	19.9349	25.7636	6.55649	6.63109	14.7714	25.3378	1.98418	0.0395017	1.60046	0.0702242	Ino80d,Ino80d,Ino80d,Ino80d	Intron,Intron,Intron,Intron
chr1	63112703	63115257	280.95	332.098	786.399	842.984	486.117	434.337	741.907	771.651	1.41416	5.8518e-18	0.718639	9.56549e-10	Ino80d,Ino80d,Ino80d,Ino80d,Ino80d,Ino80d,Ino80d,Ino80d,Ino80d,Ino80dos,Ino80d,Ino80dos,Ino80d,Ino80d,Intergenic	Intron,Intron,Intron,Intron,Promoter,Promoter,Promoter,Promoter,Exon,Promoter,Exon,Promoter,Exon,Exon,Intergenic
chr1	63119692	63120464	41.7823	53.7772	189.038	163.856	66.5015	40.6154	136.278	143.389	1.89136	1.48801e-08	1.39096	3.46146e-05	Ino80dos	Promoter
chr1	63130863	63131045	7.20385	11.3215	13.0608	9.79016	17.7962	29.8399	9.05346	6.33444	0.3078	0.796276	-1.62743	0.0388102	Ndufs1	Exon
chr1	63134580	63134889	16.5688	22.6431	2.74965	3.6069	40.2756	53.8776	10.9595	3.45515	-2.61103	0.0153512	-2.68385	4.01921e-05	Ndufs1	Exon
chr1	63175983	63177753	224.04	276.434	600.11	731.17	335.318	311.661	707.599	648.417	1.4167	8.62621e-14	1.06938	9.55827e-17	Ndufs1,Ndufs1,Ndufs1,Ndufs1,Eef1b2,Ndufs1,Ndufs1,Intergenic	Intron,Intron,Promoter,Promoter,Promoter,Exon,Exon,Intergenic
chr1	63178033	63178640	19.4504	13.2084	74.2404	70.0769	19.6695	27.3533	62.4212	33.9757	2.12959	7.02388e-05	1.0357	0.0692703	Snora41	Promoter
chr1	63180741	63181747	100.133	83.0245	266.716	349.354	188.265	208.879	259.215	322.481	1.74719	4.08829e-11	0.547648	0.007914	Intergenic	Intergenic
chr1	63182734	63182912	0.720385	7.54768	22.6846	23.1872	9.36641	14.92	18.1069	31.0964	2.53425	0.023757	1.00806	0.189439	Gpr1,Gpr1,Gpr1,Gpr1,Gpr1	Exon,Exon,Exon,Exon,Exon
chr1	63204058	63204194	7.92423	9.4346	1.37482	3.09163	14.9863	17.4066	1.90599	2.87929	-1.9333	0.213539	-2.77256	0.00746057	Gpr1,Gpr1,Gpr1,Gpr1,Gpr1	Intron,Intron,Intron,Intron,Intron
chr1	63567124	63567397	8.64462	2.83038	32.9957	25.7636	6.55649	4.14443	23.3484	16.6999	2.31742	0.0111403	1.91529	0.0351307	Intergenic	Intergenic
chr1	63665316	63665789	49.7065	33.0211	6.87411	4.63744	87.1076	60.5087	6.19447	10.9413	-2.86535	0.000140359	-3.12137	2.34678e-09	Dytn	Intron
chr1	63668875	63669119	7.20385	3.77384	26.1216	25.2483	9.36641	16.5777	14.2949	17.2758	2.20286	0.0186411	0.274767	0.761818	Dytn	Intron
chr1	63730009	63731115	89.3277	88.6853	275.652	292.674	135.813	134.28	315.442	291.384	1.67508	3.01197e-11	1.16866	3.64708e-09	Mdh1b,Mdh1b,Fastkd2,Fastkd2,Mdh1b,Intergenic	Intron,Promoter,Promoter,Promoter,Exon,Intergenic
chr1	63776567	63776724	7.92423	11.3215	2.06223	3.6069	18.7328	14.0911	4.28848	0.575859	-1.74354	0.227869	-2.71233	0.0134814	Intergenic	Intergenic
chr1	63998258	63998373	5.76308	11.3215	0.687411	8.75962	13.113	17.4066	0.476498	2.87929	-0.82035	0.60984	-3.23542	0.00578497	Intergenic	Intergenic
chr1	64000448	64001301	84.285	112.272	24.0594	30.9163	198.568	218.826	53.3678	52.979	-1.82834	3.55869e-05	-1.97317	1.64322e-14	Intergenic	Intergenic
chr1	64021032	64021196	0	3.77384	15.8105	19.065	0.936641	0.828886	8.10046	7.48616	3.31103	0.0171139	3.14627	0.0648665	Intergenic	Intergenic
chr1	64052143	64052440	7.20385	4.7173	22.6846	29.8858	3.74657	9.11775	16.2009	25.3378	2.12815	0.02011	1.67363	0.0617988	Klf7,Klf7,Klf7,Klf7	Intron,Intron,Intron,Intron
chr1	64053612	64053937	4.32231	11.3215	33.6832	48.9508	2.80992	3.31555	43.3613	27.0654	2.43802	0.00171557	3.5213	4.61809e-05	Klf7,Klf7,Klf7,Klf7	Intron,Intron,Intron,Intron
chr1	64075950	64076424	20.8912	24.53	15.1231	14.4276	62.755	58.0221	5.71798	5.18273	-0.618501	0.459371	-3.46579	1.46816e-09	Klf7,Klf7,Klf7,Klf7	Intron,Intron,Intron,Intron
chr1	64077321	64077863	61.2327	61.3249	11.686	15.9734	68.3748	79.5731	22.8719	6.33444	-2.13791	0.000153268	-2.33284	0.0118608	Klf7,Klf7,Klf7,Klf7	Intron,Intron,Intron,Intron
chr1	64078358	64079127	56.19	66.9857	87.9887	160.765	83.3611	78.7442	124.842	99.6235	1.02199	0.0154478	0.47219	0.156908	Klf7,Klf7,Klf7,Klf7,Klf7,Klf7,Klf7,Klf7	Intron,Intron,Intron,Intron,Exon,Exon,Exon,Exon
chr1	64085965	64086246	38.9008	17.9257	7.56153	9.27489	37.4657	30.6688	7.62397	10.3655	-1.7582	0.0414075	-1.92635	0.00349284	Klf7,Klf7,Klf7,Klf7	Intron,Intron,Intron,Intron
chr1	64091275	64091908	72.0385	83.0245	4.12447	9.79016	158.292	174.895	7.14747	2.87929	-3.4389	4.8724e-09	-5.01346	1.62362e-28	Klf7,Klf7,Klf7,Klf7	Intron,Intron,Intron,Intron
chr1	64101120	64101920	46.1046	55.6642	26.1216	15.9734	118.017	168.264	19.5364	26.4895	-1.2816	0.0337704	-2.64617	2.32773e-13	Klf7,Klf7,Klf7,Klf7	Intron,Intron,Intron,Intron
chr1	64105289	64105813	62.6735	101.894	4.81188	13.3971	73.058	92.0064	6.67097	16.6999	-3.13655	1.15782e-07	-2.84302	1.68359e-08	Klf7,Klf7,Klf7,Klf7	Intron,Intron,Intron,Intron
chr1	64114442	64114598	7.92423	4.7173	2.74965	3.6069	15.9229	22.3799	2.85899	1.72758	-0.993623	0.550229	-3.04828	0.00208453	Klf7,Klf7,Klf7,Klf7	Intron,Intron,Intron,Intron
chr1	64116996	64117228	20.8912	22.6431	2.06223	3.6069	20.6061	24.8666	2.85899	4.60687	-2.91692	0.00550163	-2.62126	0.0024173	Klf7,Klf7,Klf7,Klf7	Intron,Intron,Intron,Intron
chr1	64118682	64122756	572.706	494.373	1471.75	1617.95	1048.1	1032.79	1430.45	1453.47	1.53179	1.22277e-29	0.47085	1.3425e-08	Klf7,Klf7,Klf7,Klf7,Klf7,Klf7,Gm35880,Klf7,Klf7,Klf7,Klf7,Klf7,Klf7,Klf7,Klf7,Klf7,Klf7,Klf7,Klf7	Intron,Intron,Intron,Intron,Promoter,Promoter,Promoter,Exon,Exon,Exon,Exon,Intron,Intron,Intron,Promoter,Promoter,Exon,Exon,Exon
chr1	64133326	64133682	35.2988	38.6819	2.74965	0.515272	51.5153	56.3643	7.14747	1.72758	-4.59644	4.72313e-06	-3.56313	5.93175e-08	Klf7	Promoter
chr1	64134388	64134768	28.8154	25.4734	10.3112	12.3665	44.0221	41.4443	9.52996	12.6689	-1.25691	0.118294	-1.95059	0.000884758	Klf7	Promoter
chr1	64189425	64189995	18.0096	4.7173	41.2447	65.4395	19.6695	22.3799	57.6562	63.9203	2.19907	0.00219724	1.52876	0.00177276	Intergenic	Intergenic
chr1	64191546	64192127	29.5358	29.2473	133.358	135.001	75.868	67.1398	126.748	138.206	2.19044	1.09149e-08	0.890559	0.00378279	Intergenic	Intergenic
chr1	64197639	64198007	13.6873	9.4346	61.1796	48.9508	14.0496	8.28886	59.0857	41.4618	2.23627	0.000359264	2.18269	0.000286334	Intergenic	Intergenic
chr1	64198222	64199466	34.5785	32.0777	154.668	180.345	28.0992	19.8933	147.714	157.785	2.32792	3.89258e-11	2.67767	4.86172e-14	Intergenic	Intergenic
chr1	64209142	64209318	11.5262	27.3604	0	4.12217	14.0496	21.551	5.24148	1.15172	-3.15665	0.0155962	-2.44917	0.01663	Intergenic	Intergenic
chr1	64209448	64209589	8.64462	10.3781	1.37482	1.03054	18.7328	15.7488	5.24148	3.45515	-2.9943	0.0653125	-1.97658	0.0342176	Intergenic	Intergenic
chr1	64226184	64226479	33.1377	46.2296	4.81188	17.5192	38.4023	39.7866	11.9124	10.3655	-1.80099	0.0222671	-1.80872	0.00266748	Intergenic	Intergenic
chr1	64287195	64287345	1.44077	1.88692	17.8727	18.5498	1.87328	2.48666	9.52996	14.3965	3.46776	0.00728918	2.44655	0.0505945	Gm35803	Promoter
chr1	64295313	64295967	13.6873	13.2084	50.8684	74.7144	12.1763	18.2355	44.7908	46.0687	2.22523	0.000154151	1.57207	0.0063411	Intergenic	Intergenic
chr1	64301074	64302092	103.735	107.554	409.01	493.63	114.27	130.135	374.051	440.532	2.09742	2.31383e-21	1.73348	4.97395e-20	Intergenic	Intergenic
chr1	64302628	64303309	41.0619	32.0777	83.1768	92.2336	64.6283	77.0864	90.5346	89.2581	1.25669	0.00506267	0.341506	0.355115	Intergenic	Intergenic
chr1	64308444	64309130	33.8581	36.795	87.9887	119.543	14.0496	19.0644	50.9853	84.6512	1.55969	0.000262353	2.02587	0.00010528	Intergenic	Intergenic
chr1	64337814	64338315	5.04269	8.49114	107.924	125.211	6.55649	7.45998	95.7761	116.323	4.14045	3.12817e-14	3.91448	7.77861e-14	Intergenic	Intergenic
chr1	64338460	64339052	17.2892	7.54768	127.171	126.242	23.416	31.4977	91.9641	107.686	3.3128	2.99169e-12	1.856	4.05472e-06	Intergenic	Intergenic
chr1	64343353	64343622	5.04269	0.94346	33.6832	36.069	3.74657	4.14443	30.9724	28.2171	3.4719	0.00024346	2.9051	0.000531774	Intergenic	Intergenic
chr1	64373862	64374400	15.8485	16.0388	93.4879	95.3252	12.1763	12.4333	72.4277	77.7409	2.56658	8.1238e-08	2.60833	1.68206e-07	Intergenic	Intergenic
chr1	64374523	64375114	15.1281	26.4169	159.479	134.486	7.49313	11.6044	103.4	130.144	2.84479	7.33183e-12	3.59881	4.16238e-14	Intergenic	Intergenic
chr1	64376330	64376727	5.04269	3.77384	37.8076	43.7981	1.87328	4.14443	13.3419	17.8516	3.19686	7.81152e-05	2.3551	0.0310304	Intergenic	Intergenic
chr1	64407369	64407673	38.9008	37.7384	8.24894	7.72907	38.4023	45.5888	5.24148	2.30343	-2.26456	0.00175845	-3.45055	9.99934e-07	Intergenic	Intergenic
chr1	64445997	64446335	36.0192	28.3038	6.87411	12.8818	47.7687	42.2732	10.9595	5.75859	-1.69046	0.0322613	-2.41319	8.25312e-05	Intergenic	Intergenic
chr1	64448061	64448388	11.5262	7.54768	61.1796	35.5537	16.8595	14.0911	42.4083	47.2204	2.32287	0.000917556	1.5362	0.00718515	Intergenic	Intergenic
chr1	64482105	64482485	12.2465	2.83038	46.0566	61.8326	20.6061	9.94664	48.6028	45.4928	2.79248	0.000125626	1.63475	0.00547446	Intergenic	Intergenic
chr1	64507531	64508051	69.8773	43.3992	34.3706	20.0956	191.075	171.58	37.1668	26.4895	-1.07134	0.0698085	-2.50147	1.86783e-16	Intergenic	Intergenic
chr1	64508442	64509080	56.9104	64.1553	50.181	28.3399	240.717	232.088	39.0728	61.041	-0.631814	0.245984	-2.24837	7.23271e-17	Intergenic	Intergenic
chr1	64530768	64534461	635.379	736.843	1332.89	1459.76	1261.66	1239.19	1342.29	1283.01	1.02769	4.38299e-14	0.0707103	0.45302	Intergenic,Creb1,Creb1,Creb1,Creb1,Creb1,Creb1,Creb1,Creb1	Intergenic,Promoter,Promoter,Promoter,Promoter,Promoter,Promoter,Promoter,Promoter
chr1	64549516	64549742	11.5262	19.8127	13.0608	15.9734	34.6557	40.6154	14.2949	7.48616	-0.0979487	0.923986	-1.77818	0.00546177	Creb1	Promoter
chr1	64600724	64600990	5.04269	5.66076	27.4965	25.2483	1.87328	1.65777	18.1069	24.7619	2.30473	0.0120271	3.6034	0.00129633	Intergenic	Intergenic
chr1	64615536	64618107	306.884	275.49	622.107	587.925	427.108	489.872	544.637	553.4	1.0524	1.50537e-09	0.258262	0.0625014	Mettl21a,Mettl21a,Mettl21a,Mettl21a,Mettl21a,Mettl21a,Mettl21a,Mettl21a,Mettl21a,Mettl21a,Mettl21a,Mettl21a,Mettl21a,Mettl21a,Mettl21a,Mettl21a,Mettl21a,Mettl21a	Intron,Intron,Intron,Intron,Promoter,Exon,Exon,Exon,Exon,Intron,Intron,Intron,Exon,Exon,Exon,Promoter,Promoter,Promoter
chr1	64621397	64621625	0.720385	2.83038	19.9349	18.5498	2.80992	2.48666	11.436	24.7619	3.50522	0.00629465	2.77087	0.0112225	Intergenic	Intergenic
chr1	64689843	64691082	327.055	354.741	961.001	1117.11	552.618	511.423	933.936	930.012	1.61045	1.25169e-25	0.809908	1.00992e-14	2810408I11Rik,2810408I11Rik,Ccnyl1,Ccnyl1,Ccnyl1,2810408I11Rik,Intergenic	Intron,Promoter,Promoter,Promoter,Promoter,Exon,Intergenic
chr1	64691361	64691870	31.6969	33.9646	85.239	74.1991	34.6557	62.1665	69.5687	71.9823	1.28026	0.00611812	0.541688	0.231448	2810408I11Rik,Ccnyl1,Ccnyl1,Ccnyl1	Promoter,Promoter,Promoter,Promoter
chr1	64735787	64739166	546.052	622.684	1212.59	1406.18	1076.2	1060.15	1235.56	1297.41	1.16667	3.35918e-16	0.245373	0.00645635	Fzd5,Fzd5,Fzd5,Fzd5,Intergenic	Exon,Promoter,Intron,Exon,Intergenic
chr1	64797015	64797890	61.2327	58.4946	151.231	182.406	115.207	116.873	183.928	156.634	1.47906	6.44339e-06	0.554555	0.0354684	Plekhm3,Plekhm3,Plekhm3	Intron,Intron,Intron
chr1	64876264	64876632	12.2465	12.265	78.3649	92.2336	9.36641	9.94664	100.541	58.7376	2.80054	7.88713e-08	3.04529	2.47489e-08	Plekhm3,Plekhm3,Plekhm3	Intron,Intron,Intron
chr1	64918926	64919225	7.20385	7.54768	28.1839	26.2788	24.3527	4.14443	14.7714	29.3688	1.8853	0.0291558	0.640269	0.493097	Plekhm3,Plekhm3,Plekhm3	Intron,Intron,Intron
chr1	64919400	64919569	7.20385	6.60422	11.686	17.004	2.80992	1.65777	10.9595	14.3965	1.05708	0.343435	2.51506	0.040193	Plekhm3,Plekhm3,Plekhm3	Intron,Intron,Intron
chr1	64925658	64926568	11.5262	25.4734	191.788	312.77	7.49313	21.551	198.223	206.157	3.78608	1.25188e-08	3.78686	4.10193e-09	Plekhm3,Plekhm3,Plekhm3	Intron,Intron,Intron
chr1	64926966	64928883	36.7396	33.0211	450.254	430.252	35.5924	34.8132	407.406	385.825	3.65171	1.3058e-44	3.49496	4.2113e-48	Plekhm3,Plekhm3,Plekhm3,Plekhm3,Plekhm3	Intron,Intron,Intron,Promoter,Exon
chr1	64929128	64929337	3.60192	1.88692	38.495	26.7941	2.80992	0	12.8654	30.5205	3.53489	0.000264739	4.0068	0.00155626	Plekhm3,Plekhm3,Plekhm3	Intron,Intron,Promoter
chr1	64932812	64933326	18.0096	13.2084	74.2404	83.9893	2.80992	10.7755	66.2332	60.4652	2.33091	7.02076e-06	3.19241	3.01231e-07	Plekhm3,Plekhm3	Intron,Intron
chr1	64956261	64957328	85.0054	61.3249	132.67	165.402	223.857	157.488	131.99	144.541	1.02162	0.00386484	-0.461858	0.082094	Plekhm3,Plekhm3,Plekhm3,Plekhm3,Plekhm3,Plekhm3,Intergenic	Intron,Intron,Promoter,Promoter,Exon,Exon,Intergenic
chr1	65010156	65010495	43.2231	35.8515	74.9278	112.329	61.8183	82.8886	92.4406	96.1684	1.24304	0.00609845	0.378733	0.303216	Intergenic	Intergenic
chr1	65088762	65089368	10.8058	2.83038	57.0551	56.6799	6.55649	2.48666	68.1392	59.3134	3.00897	1.93083e-05	3.84549	1.14743e-08	Intergenic	Intergenic
chr1	65090364	65090744	7.20385	12.265	56.3677	83.474	9.36641	4.97332	69.0922	64.4962	2.87055	2.21853e-06	3.23667	3.80639e-08	Intergenic	Intergenic
chr1	65091723	65091876	0.720385	0.94346	15.8105	19.5803	0.936641	0	22.3954	5.75859	4.43128	0.00424556	4.99633	0.00978205	Intergenic	Intergenic
chr1	65107622	65108237	12.2465	9.4346	69.4285	55.1341	8.42977	6.63109	46.2203	65.072	2.50976	2.95378e-05	2.88923	2.83012e-06	D630023F18Rik,D630023F18Rik	Intron,Exon
chr1	65112093	65112333	11.5262	3.77384	58.43	43.2828	16.8595	25.6955	36.6903	32.8239	2.69048	0.000192619	0.703656	0.250837	D630023F18Rik,D630023F18Rik	Intron,Intron
chr1	65112480	65113339	23.0523	17.9257	162.229	163.856	11.2397	24.0377	135.325	107.11	2.98073	8.56626e-15	2.76654	1.2135e-10	D630023F18Rik,D630023F18Rik,Gm36358	Intron,Intron,Promoter
chr1	65113536	65114097	11.5262	10.3781	93.4879	95.3252	4.68321	14.92	63.3742	68.5272	3.10263	1.31004e-09	2.72717	2.33529e-06	D630023F18Rik,D630023F18Rik,Gm36358	Intron,Intron,Promoter
chr1	65177048	65177212	2.88154	0.94346	24.7468	12.8818	2.80992	1.65777	14.2949	13.2447	3.24266	0.0108725	2.63724	0.0270507	Idh1,Idh1	Intron,Intron
chr1	65177562	65180185	367.396	349.08	1202.28	1100.62	693.115	705.382	998.263	1071.67	1.68276	6.53501e-32	0.564838	1.09788e-08	Idh1,Idh1,Idh1,Idh1	Intron,Intron,Promoter,Exon
chr1	65185901	65187825	319.13	319.833	815.27	815.16	481.434	495.674	745.719	776.257	1.35149	1.62679e-18	0.638575	1.57364e-08	Idh1,Idh1,Pikfyve,Pikfyve,Pikfyve,Pikfyve,Idh1,Intergenic	Intron,Promoter,Promoter,Promoter,Promoter,Promoter,Exon,Intergenic
chr1	65227689	65228089	13.6873	3.77384	37.1202	57.1951	10.3031	10.7755	62.8977	54.1307	2.39794	0.00150053	2.47303	9.06545e-06	Pikfyve	Promoter
chr1	65230682	65230868	1.44077	2.83038	13.7482	15.4581	3.74657	1.65777	16.2009	16.6999	2.80526	0.0358682	2.62452	0.016633	Pikfyve	Promoter
chr1	65245753	65245977	1.44077	8.49114	28.8713	18.0345	18.7328	12.4333	15.2479	23.0343	2.28524	0.0332902	0.297293	0.719508	Intergenic	Intergenic
chr1	65282837	65283100	8.64462	5.66076	32.3083	20.0956	36.529	41.4443	15.7244	19.5792	1.85516	0.0405323	-1.14775	0.0463915	Pth2r	Promoter
chr1	66279211	66281239	119.584	104.724	294.899	293.705	145.179	137.595	394.064	358.76	1.38838	1.22993e-08	1.41427	8.78626e-15	Map2	Promoter
chr1	66552418	66552995	95.0908	112.272	29.5587	42.7675	52.4519	35.6421	32.4019	21.3068	-1.50936	0.000365564	-0.705659	0.205043	Unc80	Promoter
chr1	66649236	66650402	46.825	65.0988	368.452	420.977	71.1847	69.6265	379.292	363.367	2.83219	4.8489e-28	2.39973	7.20995e-31	Gm39655,Gm39655	Exon,Intron
chr1	66668954	66669201	5.76308	5.66076	24.7468	24.733	22.4794	7.45998	24.3014	36.2791	2.11412	0.0230463	1.02645	0.164481	Gm39655	Promoter
chr1	66698573	66698781	1.44077	0	28.1839	31.4316	0.936641	5.80221	22.3954	23.6102	5.22394	0.000186583	2.73754	0.00494764	Intergenic	Intergenic
chr1	66700206	66701831	304.723	326.437	867.513	900.695	525.456	489.043	851.978	867.243	1.48804	1.92548e-22	0.761802	1.8649e-12	Intergenic,Rpe,Rpe,Rpe	Intergenic,Promoter,Promoter,Promoter
chr1	66712895	66713240	12.9669	4.7173	68.7411	79.3518	25.2893	33.9843	53.8443	66.2237	3.02552	6.40424e-07	1.01274	0.0345791	Kansl1l	Exon
chr1	66806869	66807125	40.3415	35.8515	3.43706	8.24435	21.5428	33.1555	9.52996	2.30343	-2.67655	0.000652555	-2.18662	0.00886994	Kansl1l,Kansl1l,Kansl1l,Kansl1l,Kansl1l,Kansl1l,Kansl1l,Kansl1l,Kansl1l,Kansl1l,Kansl1l	Intron,Intron,Intron,Intron,Intron,Intron,Intron,Intron,Intron,Intron,Intron
chr1	66813549	66815200	56.19	49.0599	140.919	100.478	82.4244	93.6642	124.842	115.172	1.1912	0.00243822	0.446078	0.156595	Kansl1l,Kansl1l,Kansl1l,Kansl1l,Kansl1l,Kansl1l,Kansl1l	Intron,Intron,Intron,Intron,Intron,Intron,Intron
chr1	66815749	66818418	582.791	675.518	1669.03	1630.83	920.718	800.704	1756.37	1703.39	1.39319	2.90591e-27	1.00891	2.21376e-30	Kansl1l,Kansl1l,Kansl1l,Kansl1l,Kansl1l,Kansl1l,Kansl1l,Kansl1l,Kansl1l,Kansl1l,Kansl1l,Kansl1l,Kansl1l,Kansl1l,Kansl1l,Kansl1l,Kansl1l,Kansl1l,Kansl1l,Kansl1l,Kansl1l,Intergenic	Intron,Intron,Intron,Intron,Intron,Intron,Intron,Promoter,Promoter,Promoter,Promoter,Promoter,Promoter,Promoter,Exon,Exon,Exon,Exon,Exon,Exon,Exon,Intergenic
chr1	66827325	66827691	13.6873	12.265	2.06223	1.03054	24.3527	29.8399	3.81198	0	-3.10124	0.0274051	-3.80714	0.0610899	Intergenic	Intergenic
chr1	66838387	66838791	8.64462	20.7561	41.9321	45.8592	20.6061	4.97332	40.9788	38.0067	1.60197	0.0219941	1.64485	0.0187097	Acadl,Acadl	Exon,Intron
chr1	66841797	66842396	105.897	119.819	57.0551	82.9587	166.722	152.515	98.6351	59.3134	-0.681442	0.0838964	-1.00888	0.00131636	Acadl	Intron
chr1	66845691	66846249	84.285	70.7595	11.686	7.2138	94.6008	76.2576	20.0129	31.0964	-3.05846	2.78753e-08	-1.74745	4.44731e-05	Acadl	Intron
chr1	66861199	66861402	3.60192	5.66076	15.8105	25.7636	8.42977	12.4333	20.9659	21.3068	2.18714	0.0370796	1.01296	0.203945	Acadl	Intron
chr1	66861802	66864336	285.272	207.561	785.711	830.102	573.225	528.001	674.721	666.844	1.70704	7.64773e-21	0.285906	0.018394	Acadl,Acadl,Acadl,Intergenic	Intron,Promoter,Exon,Intergenic
chr1	66881866	66882000	19.4504	16.0388	2.06223	5.15272	24.3527	20.7222	2.38249	0.575859	-2.27265	0.0433038	-3.87975	0.000164543	Intergenic	Intergenic
chr1	66884109	66884557	38.1804	40.5688	10.3112	15.4581	38.4023	58.0221	2.85899	9.21374	-1.60071	0.020506	-3.02921	5.98428e-06	Intergenic	Intergenic
chr1	66932062	66932259	2.16115	6.60422	15.1231	20.6109	2.80992	5.80221	23.8249	32.2481	2.06574	0.0700505	2.68446	0.00162691	Myl1,Myl1,Myl1,Myl1	Intron,Intron,Intron,Intron
chr1	66980197	66980472	10.8058	15.0954	7.56153	1.54581	29.0359	38.9577	2.38249	5.18273	-1.53465	0.237899	-3.19417	2.89021e-05	Intergenic	Intergenic
chr1	66982110	66982246	14.4077	7.54768	1.37482	0.515272	14.0496	14.92	0.952996	4.03101	-3.59364	0.0290293	-2.57325	0.0212336	Intergenic	Intergenic
chr1	66982375	66982668	37.46	45.2861	7.56153	3.6069	49.642	59.6798	3.33549	9.21374	-2.91663	0.000125626	-3.15242	3.23244e-07	Intergenic	Intergenic
chr1	66997601	66998119	47.5454	27.3604	4.81188	5.66799	60.8817	59.6798	2.85899	2.87929	-2.8366	0.000365244	-4.39321	2.86806e-11	Intergenic	Intergenic
chr1	67038091	67039462	143.357	216.996	439.943	505.997	270.689	242.035	507.47	519.424	1.4007	1.39542e-09	1.00346	6.57898e-12	Lancl1,Lancl1,Lancl1,Lancl1,Lancl1,Lancl1,Lancl1,Lancl1,Lancl1,Lancl1,Lancl1,Intergenic	Intron,Intron,Intron,Promoter,Promoter,Promoter,Exon,Exon,Exon,Intron,Exon,Intergenic
chr1	67042728	67043012	5.04269	9.4346	4.12447	9.79016	30.9092	31.4977	10.483	10.3655	-0.0347557	0.981831	-1.5817	0.0166902	Intergenic	Intergenic
chr1	67397761	67398405	14.4077	24.53	63.2418	57.7104	11.2397	5.80221	40.0258	48.3721	1.64971	0.0040325	2.38738	0.000244787	Intergenic	Intergenic
chr1	68766154	68766378	2.16115	2.83038	51.5559	36.5843	4.68321	0.828886	36.6903	33.3998	4.15706	4.69448e-06	3.71137	3.85087e-05	Erbb4,Erbb4,Erbb4	Intron,Intron,Intron
chr1	68766514	68766659	3.60192	0.94346	17.8727	14.4276	0.936641	4.97332	12.8654	14.3965	2.77595	0.0316738	2.17702	0.0625433	Erbb4,Erbb4,Erbb4	Intron,Intron,Intron
chr1	69286406	69286750	19.4504	18.8692	0.687411	7.2138	44.0221	28.1821	4.28848	9.7896	-2.23318	0.0586187	-2.37412	0.000765921	Intergenic	Intergenic
chr1	69291390	69291616	12.9669	3.77384	10.9986	3.6069	42.1489	29.8399	3.81198	6.33444	-0.227222	0.879185	-2.83916	6.36463e-05	Intergenic	Intergenic
chr1	69343510	69344199	65.555	128.311	2.06223	12.8818	179.835	189.815	7.14747	6.33444	-3.67914	0.00475443	-4.77153	1.08288e-32	Intergenic	Intergenic
chr1	69350916	69351187	23.0523	13.2084	0	3.6069	34.6557	33.1555	7.62397	3.45515	-3.25362	0.0139676	-2.59352	0.000312058	Intergenic	Intergenic
chr1	69367611	69367938	36.0192	37.7384	13.7482	10.3054	50.5786	43.931	11.9124	8.63788	-1.62346	0.0219825	-2.19284	0.000128849	Intergenic	Intergenic
chr1	69382446	69382715	5.76308	2.83038	24.0594	19.065	6.55649	12.4333	39.5493	33.3998	2.29898	0.0272589	1.93131	0.00445296	Intergenic	Intergenic
chr1	69454002	69454334	28.8154	36.795	12.3734	19.5803	56.1985	64.6531	14.2949	17.2758	-1.0256	0.162955	-1.94162	7.87438e-05	Intergenic	Intergenic
chr1	69460881	69461629	100.854	105.668	17.8727	22.1567	163.912	187.328	40.9788	10.9413	-2.35941	6.38352e-08	-2.75375	0.0039063	Intergenic	Intergenic
chr1	69498828	69499486	20.1708	18.8692	86.6138	94.81	25.2893	29.011	70.5217	79.4685	2.21468	2.66082e-06	1.46272	0.000860681	Intergenic	Intergenic
chr1	69513188	69513987	79.2423	59.438	21.9972	16.4887	106.777	136.766	20.0129	21.8826	-1.86046	0.000419203	-2.5431	7.23737e-12	Intergenic	Intergenic
chr1	69543970	69544713	93.65	125.48	21.3098	47.9203	272.563	269.388	74.8102	89.8339	-1.64506	0.00049271	-1.72221	6.53754e-15	Ikzf2,Ikzf2,Ikzf2,Ikzf2,Ikzf2,Ikzf2,Ikzf2,Ikzf2,Ikzf2,Ikzf2	Intron,Intron,Intron,Intron,Intron,Intron,Intron,Intron,Intron,Intron
chr1	69637834	69638688	64.8346	38.6819	15.1231	24.2178	114.27	125.991	29.0664	29.3688	-1.39188	0.0258749	-2.0406	4.68032e-09	Ikzf2,Ikzf2,Ikzf2,Ikzf2,Ikzf2,Ikzf2,Ikzf2,Ikzf2,Ikzf2,Ikzf2	Intron,Intron,Intron,Intron,Intron,Intron,Intron,Intron,Intron,Intron
chr1	69682937	69683476	36.7396	33.0211	98.9872	120.574	81.4878	63.8243	64.8037	73.134	1.65284	5.77422e-05	-0.0740102	0.865365	Ikzf2,Ikzf2,Ikzf2,Ikzf2,Ikzf2,Ikzf2,Ikzf2,Ikzf2,Ikzf2,Ikzf2,Ikzf2,Ikzf2,Ikzf2,Ikzf2,Ikzf2,Ikzf2,Ikzf2,Ikzf2,Ikzf2,Ikzf2,Ikzf2,Ikzf2,Ikzf2,Ikzf2,Ikzf2,Ikzf2,Ikzf2,Ikzf2,Ikzf2,Ikzf2	Intron,Intron,Intron,Intron,Intron,Intron,Intron,Intron,Intron,Intron,Exon,Exon,Exon,Exon,Exon,Exon,Exon,Exon,Exon,Exon,Intron,Intron,Intron,Intron,Intron,Intron,Intron,Intron,Intron,Intron
chr1	69684494	69684801	7.92423	4.7173	26.809	20.0956	10.3031	14.0911	14.2949	16.124	1.87197	0.0492099	0.313378	0.729455	Ikzf2,Ikzf2,Ikzf2,Ikzf2,Ikzf2,Ikzf2,Ikzf2,Ikzf2,Ikzf2,Ikzf2,Ikzf2,Ikzf2,Ikzf2,Ikzf2,Ikzf2,Ikzf2	Intron,Intron,Intron,Intron,Intron,Intron,Intron,Intron,Intron,Intron,Promoter,Promoter,Promoter,Promoter,Exon,Exon
chr1	69686228	69688550	221.158	205.674	584.3	567.829	354.05	351.448	539.872	536.124	1.43058	1.85835e-15	0.609128	5.72928e-06	Ikzf2,Ikzf2,Ikzf2,Ikzf2,Ikzf2,Ikzf2,Ikzf2,Ikzf2,Ikzf2,Ikzf2,Ikzf2,Ikzf2,Ikzf2,Ikzf2,Intergenic	Promoter,Promoter,Promoter,Promoter,Promoter,Promoter,Promoter,Promoter,Intron,Intron,Promoter,Promoter,Exon,Exon,Intergenic
chr1	69688683	69689601	46.825	70.7595	139.545	199.41	96.4741	127.649	133.419	152.027	1.5397	2.05683e-05	0.344868	0.249904	Intergenic	Intergenic
chr1	69759260	69759965	58.3512	65.0988	94.1754	72.138	199.505	179.039	97.2056	69.103	0.42886	0.330976	-1.18118	1.43648e-05	Intergenic	Intergenic
chr1	69768555	69769447	94.3704	101.894	51.5559	40.7065	247.273	269.388	57.6562	48.3721	-1.09275	0.00822811	-2.28126	2.10956e-21	Intergenic	Intergenic
chr1	69810095	69810694	66.2754	62.2684	16.4979	29.3705	76.8046	103.611	23.3484	27.0654	-1.47493	0.00727923	-1.84428	6.57649e-06	Intergenic	Intergenic
chr1	69826820	69827276	23.7727	3.77384	6.1867	6.69853	27.1626	48.0754	16.6774	6.9103	-1.11098	0.381537	-1.66353	0.0145685	Intergenic,Spag16,Spag16,Spag16	Intergenic,Promoter,Promoter,Promoter
chr1	69868342	69868672	24.4931	33.9646	4.81188	5.15272	32.7824	32.3266	5.24148	5.18273	-2.54624	0.00328121	-2.64249	0.000210199	Spag16,Spag16	Promoter,Promoter
chr1	69870077	69870654	69.1569	70.7595	0	3.09163	33.7191	24.8666	10.483	5.75859	-5.35374	1.41694e-10	-1.83697	0.0113054	Spag16,Spag16	Promoter,Promoter
chr1	71000050	71000208	20.1708	16.9823	6.1867	2.06109	11.2397	19.8933	4.76498	8.06202	-2.20503	0.0458397	-1.29257	0.173892	Intergenic	Intergenic
chr1	71003829	71004037	2.16115	3.77384	26.1216	29.8858	1.87328	4.97332	23.8249	24.1861	3.26841	0.00110749	2.78768	0.00280265	Intergenic	Intergenic
chr1	71004202	71004663	23.0523	16.0388	107.924	138.608	33.7191	37.2999	88.6286	95.5925	2.64435	1.44213e-09	1.37301	0.000437376	Intergenic	Intergenic
chr1	71052727	71053373	34.5785	47.173	8.93635	5.15272	62.755	44.7599	4.76498	7.48616	-2.5528	0.000551196	-3.14561	1.64497e-07	Bard1,Bard1,Bard1	Intron,Intron,Intron
chr1	71098049	71098285	10.8058	4.7173	27.4965	29.8858	4.68321	11.6044	25.2544	46.6445	1.86197	0.0323044	2.12316	0.00417034	Bard1,Bard1,Bard1	Intron,Intron,Intron
chr1	71102068	71103952	504.99	546.264	1559.05	1552	950.691	920.064	1528.61	1595.13	1.5668	3.71993e-35	0.739701	4.0971e-19	Bard1,Bard1,Bard1,Bard1,Bard1,Bard1,Bard1,Bard1,Bard1,Intergenic	Intron,Intron,Intron,Promoter,Promoter,Promoter,Exon,Exon,Exon,Intergenic
chr1	71115907	71116097	3.60192	5.66076	16.4979	15.9734	4.68321	4.14443	32.4019	12.093	1.8244	0.106642	2.34167	0.014482	Intergenic	Intergenic
chr1	71556553	71558021	321.292	396.253	766.464	967.165	665.015	798.218	908.205	845.936	1.27713	8.47353e-13	0.260476	0.0300803	Intergenic,Atic	Intergenic,Promoter
chr1	71576764	71577324	31.6969	23.5865	18.5601	16.4887	49.642	69.6265	30.0194	22.4585	-0.664119	0.384735	-1.18267	0.0145583	Intergenic	Intergenic
chr1	71652613	71654021	46.825	50.9469	198.662	181.376	90.8542	100.295	172.492	172.182	1.96061	5.83618e-10	0.849221	0.00124723	Fn1,Fn1,Fn1,Fn1,Apol7d,Fn1,Fn1,Intergenic	Intron,Intron,Promoter,Promoter,Promoter,Exon,Exon,Intergenic
chr1	71675308	71675686	3.60192	1.88692	21.3098	48.4355	10.3031	3.31555	12.8654	32.8239	3.63946	0.000217269	1.75719	0.0572691	LOC108167627	Promoter
chr1	71723120	71723220	1.44077	0	8.93635	9.27489	0.936641	0.828886	10.0065	16.124	3.55194	0.0666764	3.88834	0.0109666	Intergenic	Intergenic
chr1	71729005	71729316	2.88154	6.60422	27.4965	24.2178	6.55649	11.6044	30.4959	33.3998	2.47788	0.0102686	1.80404	0.0110411	Gm30160,Gm39660	Promoter,Exon
chr1	71729904	71730099	2.88154	1.88692	7.56153	15.9734	0.936641	1.65777	15.7244	23.6102	2.29377	0.109043	3.90216	0.00172939	Gm39660	Exon
chr1	71730254	71730338	0	7.54768	4.12447	8.75962	0	0.828886	7.62397	11.5172	0.814375	0.674087	4.44717	0.0265264	Gm39660,Gm39660	Exon,Intron
chr1	71730829	71731387	7.20385	11.3215	63.2418	69.0464	1.87328	3.31555	55.2738	51.2514	2.85736	2.27036e-06	4.34143	7.76841e-08	Gm39660	Intron
chr1	71735687	71735853	2.16115	4.7173	14.4356	18.5498	0.936641	0.828886	16.6774	18.4275	2.29313	0.0545579	4.31704	0.00255121	Gm39660	Intron
chr1	71757883	71758057	1.44077	1.88692	20.6223	19.5803	1.87328	0	23.3484	16.124	3.60999	0.00393457	4.46996	0.00156925	Intergenic	Intergenic
chr1	71760288	71760666	14.4077	15.0954	46.0566	43.7981	7.49313	16.5777	60.5152	39.7342	1.60765	0.0127749	2.04736	0.000846925	Intergenic	Intergenic
chr1	71880591	71880731	0.720385	1.88692	13.0608	21.6414	5.61985	0.828886	7.62397	14.3965	3.793	0.00734351	1.79401	0.160397	Intergenic	Intergenic
chr1	71893505	71893929	8.64462	14.1519	98.9872	104.6	4.68321	2.48666	82.9106	98.4718	3.18346	3.03602e-10	4.68157	2.23081e-12	Intergenic	Intergenic
chr1	71895820	71896063	4.32231	0	32.9957	25.7636	2.80992	0	24.3014	14.9723	3.65876	0.000838206	3.87031	0.0022993	Gm28818,Gm28818	Intron,Intron
chr1	71912344	71912835	7.20385	11.3215	59.1174	62.8631	15.9229	5.80221	48.6028	67.9513	2.73941	1.05159e-05	2.44032	4.77068e-05	Intergenic	Intergenic
chr1	71913336	71913669	5.04269	0	33.6832	35.0385	6.55649	7.45998	21.4424	30.5205	3.72167	0.0364535	1.88527	0.0173188	Intergenic	Intergenic
chr1	71938013	71939098	21.6115	20.7561	140.232	129.848	11.2397	11.6044	125.319	114.596	2.66995	3.8957e-11	3.39228	2.28128e-14	Intergenic	Intergenic
chr1	71940564	71941031	11.5262	3.77384	42.6195	65.9548	1.87328	4.14443	32.8784	22.4585	2.78966	9.28239e-05	3.1832	0.000578096	Intergenic	Intergenic
chr1	71953049	71953418	3.60192	6.60422	61.867	29.8858	1.87328	5.80221	29.5429	30.5205	3.19136	7.77491e-05	2.94235	0.000586018	Intergenic	Intergenic
chr1	71953937	71954130	6.48346	0.94346	23.372	17.004	0.936641	0.828886	10.483	20.7309	2.38674	0.0381522	4.1439	0.00525705	Intergenic	Intergenic
chr1	71967534	71968077	13.6873	4.7173	83.8642	102.024	9.36641	3.31555	52.8913	54.7066	3.29156	5.30347e-09	3.10923	2.09422e-06	4933417E11Rik	Intron
chr1	71974737	71975150	13.6873	7.54768	115.485	108.207	0	4.14443	111.501	118.051	3.36677	1.26505e-11	5.71573	1.32069e-13	4933417E11Rik	Intron
chr1	71987620	71987878	0.720385	0	24.7468	23.1872	0	1.65777	9.52996	5.18273	5.8777	0.00111813	3.09986	0.0834899	4933417E11Rik	Intron
chr1	71988076	71988415	1.44077	10.3781	72.8656	43.7981	6.55649	0.828886	36.2138	41.4618	3.33236	0.0109415	3.43684	3.69803e-05	4933417E11Rik	Intron
chr1	72013904	72014244	5.04269	5.66076	39.1824	51.5272	7.49313	2.48666	41.4553	49.5238	3.09124	4.46444e-05	3.21414	9.55044e-06	Intergenic	Intergenic
chr1	72104105	72104221	0.720385	0	13.7482	11.336	1.87328	3.31555	6.19447	1.15172	4.94856	0.0156216	0.508646	0.785731	Intergenic	Intergenic
chr1	72105557	72105830	7.20385	0.94346	24.7468	42.7675	1.87328	2.48666	16.2009	19.5792	2.99053	0.00180764	3.02791	0.00636982	Intergenic	Intergenic
chr1	72106585	72107005	2.88154	7.54768	94.8628	102.539	5.61985	2.48666	89.5816	73.7099	4.30277	2.88983e-12	4.35926	3.23844e-11	Intergenic	Intergenic
chr1	72107111	72107586	12.2465	8.49114	88.6761	78.3213	0.936641	3.31555	67.1862	74.2858	2.99134	3.7708e-08	5.01519	9.64535e-10	Intergenic,Gm4319	Intergenic,Exon
chr1	72123595	72123956	20.1708	21.6996	39.1824	29.8858	17.7962	14.92	43.8378	40.3101	0.72047	0.296876	1.36645	0.0182293	Gm4319,Gm4319,Intergenic	Promoter,Exon,Intergenic
chr1	72133846	72134081	2.16115	6.60422	20.6223	15.9734	2.80992	6.63109	18.5834	24.7619	2.09555	0.0634669	2.18028	0.0170514	Intergenic	Intergenic
chr1	72134571	72134761	2.16115	0	20.6223	15.4581	0.936641	2.48666	7.62397	21.8826	3.94236	0.00635441	3.07853	0.0175138	Intergenic	Intergenic
chr1	72141943	72142328	25.2135	14.1519	34.3706	54.6188	21.5428	22.3799	52.4148	39.7342	1.16799	0.0815443	1.07072	0.0487948	Intergenic	Intergenic
chr1	72197076	72197318	6.48346	5.66076	23.372	23.1872	4.68321	2.48666	16.6774	24.1861	1.93398	0.0404483	2.52243	0.00976349	Mreg,Mreg,Mreg,Mreg	Intron,Intron,Intron,Promoter
chr1	72211837	72212487	39.6212	64.1553	113.423	108.207	80.5512	77.0864	65.7567	89.8339	1.10489	0.00749353	-0.0214726	0.96057	Mreg,Mreg,Mreg,Mreg,Mreg,Mreg,Intergenic	Intron,Intron,Promoter,Promoter,Exon,Exon,Intergenic
chr1	72226329	72227446	301.841	282.095	94.1754	71.6227	308.155	326.581	37.1668	57.01	-1.8236	2.00317e-12	-2.76369	2.44976e-30	Intergenic	Intergenic
chr1	72229058	72229390	7.20385	5.66076	40.5573	26.2788	5.61985	1.65777	46.6968	21.3068	2.36405	0.00446483	3.25587	0.000240963	Intergenic	Intergenic
chr1	72237055	72238224	172.172	150.954	50.8684	40.1912	147.989	149.2	31.4489	43.1894	-1.83482	6.07094e-08	-1.99983	3.75454e-10	D230017M19Rik	Promoter
chr1	72254143	72254910	65.555	101.894	165.666	170.555	140.496	144.226	148.191	149.723	1.01489	0.00269609	0.0649456	0.822928	Pecr,Pecr	Exon,Exon
chr1	72255089	72257022	550.374	565.133	189.726	175.708	564.795	561.985	177.257	169.878	-1.61141	1.05451e-18	-1.69772	3.37064e-32	Pecr,Pecr	Exon,Exon
chr1	72283829	72284831	97.9723	145.293	342.331	490.539	275.373	223.799	398.352	388.129	1.78542	1.24349e-11	0.658609	0.000117026	Pecr,Pecr,Pecr,Pecr,Tmem169,Tmem169,Tmem169,Pecr,Pecr,Intergenic	Intron,Intron,Promoter,Promoter,Promoter,Promoter,Promoter,Exon,Exon,Intergenic
chr1	72372521	72372807	5.76308	3.77384	26.1216	24.733	18.7328	16.5777	16.2009	18.4275	2.39748	0.0117129	-0.0282785	0.973871	Intergenic	Intergenic
chr1	72428561	72429602	15.1281	27.3604	219.284	245.785	10.3031	11.6044	191.076	146.844	3.48248	3.53954e-22	3.94499	5.57547e-21	March4,March4,March4,March4	Exon,Exon,Intron,Intron
chr1	72582629	72584025	230.523	218.883	766.464	824.95	331.571	428.534	832.918	750.92	1.82339	1.56255e-28	1.05686	5.60113e-15	Smarcal1,Smarcal1,Smarcal1	Promoter,Promoter,Promoter
chr1	72593467	72593841	8.64462	15.0954	31.6209	35.0385	9.36641	3.31555	16.6774	14.3965	1.5063	0.0493794	1.30914	0.185028	Smarcal1	Promoter
chr1	72711163	72711988	72.0385	75.4768	154.668	164.372	85.2344	102.782	174.398	139.934	1.11467	0.000505695	0.740954	0.0102555	Intergenic,Rpl37a	Intergenic,Promoter
chr1	72798541	72798744	28.095	27.3604	3.43706	2.57636	7.49313	15.7488	0.476498	2.87929	-3.21909	0.000652508	-2.83889	0.0292886	Intergenic	Intergenic
chr1	73862757	73863344	35.2988	59.438	12.3734	8.24435	104.904	80.402	12.3889	17.2758	-2.20678	0.00114193	-2.64998	1.23883e-09	6030407O03Rik,6030407O03Rik	Exon,Intron
chr1	73902101	73902635	25.9338	30.1907	48.1188	56.1646	18.7328	30.6688	48.6028	56.4341	0.899192	0.112074	1.08047	0.0384612	Intergenic	Intergenic
chr1	73910771	73911123	30.2562	23.5865	6.1867	14.9429	53.3886	53.8776	5.71798	15.5482	-1.33491	0.121897	-2.35473	6.88312e-05	Tns1,Tns1,Tns1,Tns1,Tns1,Tns1,Tns1,Tns1,Tns1,Tns1,Tns1,Tns1,Tns1,Tns1,Tns1,Tns1,Tns1,Tns1	Exon,Exon,Exon,Exon,Exon,Exon,Exon,Exon,Exon,Exon,Exon,Exon,Exon,Exon,Exon,Exon,Exon,Exon
chr1	73934892	73935124	8.64462	7.54768	3.43706	5.66799	32.7824	22.3799	5.24148	4.60687	-0.822859	0.569963	-2.47962	0.00137288	Tns1,Tns1,Tns1,Tns1,Tns1,Tns1,Tns1,Tns1,Tns1,Tns1,Tns1,Tns1,Tns1,Tns1,Tns1,Tns1,Tns1,Tns1	Intron,Intron,Intron,Intron,Intron,Intron,Intron,Intron,Intron,Intron,Intron,Intron,Intron,Intron,Intron,Intron,Intron,Intron
chr1	73935400	73937655	121.025	150.954	36.4328	74.1991	331.571	287.624	85.2931	85.8029	-1.28475	0.00203741	-1.85468	4.24263e-19	Tns1,Tns1,Tns1,Tns1,Tns1,Tns1,Tns1,Tns1,Tns1,Tns1,Tns1,Tns1,Tns1,Tns1,Tns1,Tns1,Tns1,Tns1,Tns1,Tns1,Tns1,Tns1,Tns1,Tns1,Tns1,Tns1,Tns1,Tns1,Tns1,Tns1,Tns1,Tns1,Tns1,Tns1,Tns1,Tns1,Tns1,Tns1,Tns1,Tns1,Tns1,Tns1,Tns1,Tns1,Tns1,Tns1,Tns1,Tns1,Tns1,Tns1,Tns1,Tns1,Tns1,Tns1,Tns1,Tns1,Tns1,Tns1,Tns1,Tns1,Tns1,Tns1,Tns1,Tns1,Tns1,Tns1,Tns1,Tns1,Tns1,Tns1,Tns1,Tns1,Tns1,Tns1,Tns1,Tns1,Tns1,Tns1,Tns1,Tns1…	Intron,Intron,Intron,Intron,Intron,Intron,Intron,Intron,Intron,Intron,Intron,Intron,Intron,Intron,Intron,Intron,Intron,Intron,Exon,Exon,Exon,Exon,Exon,Exon,Exon,Exon,Exon,Exon,Exon,Exon,Exon,Exon,Exon,Exon,Exon,Intron,Intron,Intron,Intron,Intron,Intron,Intron,Intron,Intron,Intron,Intron,Intron,Intron,Intron,Intron,Intron,Intron,Exon,Exon,Exon,Exon,Exon,Exon,Exon,Exon,Exon,Exon,Exon,Exon,Exon,Exon…
chr1	73940520	73941379	45.3842	92.4591	8.24894	9.79016	134.876	142.568	18.1069	20.7309	-2.9212	1.88485e-06	-2.84091	5.42179e-16	Tns1,Tns1,Tns1,Tns1,Tns1,Tns1,Tns1,Tns1,Tns1,Tns1,Tns1,Tns1,Tns1,Tns1,Tns1,Tns1,Tns1,Tns1,Tns1,Tns1,Tns1,Tns1,Tns1,Tns1,Tns1,Tns1,Tns1,Tns1,Tns1,Tns1,Tns1,Tns1,Tns1,Tns1,Tns1,Tns1,Tns1,Tns1,Tns1,Tns1,Tns1,Tns1,Tns1,Tns1,Tns1,Tns1,Tns1,Tns1,Tns1,Tns1,Tns1,Tns1,Tns1,Tns1	Intron,Intron,Intron,Intron,Intron,Intron,Intron,Intron,Intron,Intron,Intron,Intron,Intron,Intron,Intron,Intron,Intron,Intron,Exon,Exon,Exon,Exon,Exon,Exon,Exon,Exon,Exon,Exon,Exon,Exon,Exon,Exon,Exon,Exon,Exon,Exon,Intron,Intron,Intron,Intron,Intron,Intron,Intron,Intron,Intron,Intron,Intron,Intron,Intron,Intron,Intron,Intron,Intron,Intron
chr1	73955455	73955760	14.4077	18.8692	19.2475	34.5232	25.2893	32.3266	10.0065	10.9413	0.704449	0.384106	-1.46331	0.0331128	Tns1,Tns1,Tns1,Tns1,Tns1,Tns1,Tns1,Tns1,Tns1,Tns1,Tns1,Tns1,Tns1,Tns1,Tns1,Tns1,Tns1,Tns1	Intron,Intron,Intron,Intron,Intron,Intron,Intron,Intron,Intron,Intron,Intron,Intron,Intron,Intron,Intron,Intron,Intron,Intron
chr1	73962935	73963110	12.2465	16.9823	7.56153	3.6069	17.7962	19.8933	3.81198	1.15172	-1.40063	0.22231	-2.89346	0.00386663	Tns1,Tns1,Tns1,Tns1,Tns1,Tns1,Tns1,Tns1,Tns1,Tns1,Tns1,Tns1,Tns1,Tns1,Tns1,Tns1,Tns1,Tns1,Tns1	Intron,Intron,Intron,Intron,Intron,Intron,Intron,Intron,Intron,Intron,Intron,Intron,Intron,Intron,Intron,Intron,Intron,Promoter,Exon
chr1	73966466	73966792	7.92423	12.265	5.49929	4.12217	14.9863	45.5888	4.28848	5.18273	-1.06925	0.418992	-2.68751	0.00108442	Tns1,Tns1,Tns1,Tns1,Tns1,Tns1,Tns1,Tns1,Tns1,Tns1,Tns1,Tns1,Tns1,Tns1,Tns1,Tns1,Tns1	Intron,Intron,Intron,Intron,Intron,Intron,Intron,Intron,Intron,Intron,Intron,Intron,Intron,Intron,Intron,Intron,Intron
chr1	73997453	73997657	5.76308	4.7173	24.0594	24.2178	7.49313	0	11.9124	15.5482	2.19611	0.0211085	1.88375	0.437627	Tns1,Tns1,Tns1,Tns1,Tns1,Tns1,Tns1,Tns1,Tns1,Tns1,Tns1,Tns1,Tns1,Tns1,Tns1,Tns1,Tns1,Tns1	Intron,Intron,Intron,Intron,Intron,Intron,Intron,Intron,Intron,Intron,Intron,Intron,Intron,Intron,Intron,Intron,Intron,Promoter
chr1	73997840	73999620	76.3608	73.5899	438.568	475.596	47.7687	87.0331	371.192	415.194	2.60715	3.39403e-31	2.54026	2.9295e-09	Tns1,Tns1,Tns1,Tns1,Tns1,Tns1,Tns1,Tns1,Tns1,Tns1,Tns1,Tns1,Tns1,Tns1,Tns1,Tns1,Tns1,Tns1,Tns1	Intron,Intron,Intron,Intron,Intron,Intron,Intron,Intron,Intron,Intron,Intron,Intron,Intron,Intron,Intron,Intron,Intron,Promoter,Exon
chr1	74007750	74007909	11.5262	3.77384	3.43706	11.8512	22.4794	16.5777	5.71798	1.72758	-0.00301227	0.998409	-2.36335	0.0130172	Tns1,Tns1,Tns1,Tns1,Tns1,Tns1,Tns1,Tns1,Tns1,Tns1,Tns1,Tns1,Tns1,Tns1,Tns1	Intron,Intron,Intron,Intron,Intron,Intron,Intron,Intron,Intron,Intron,Intron,Intron,Intron,Intron,Intron
chr1	74015845	74016463	47.5454	40.5688	11.686	9.27489	76.8046	94.4931	20.9659	24.7619	-2.08074	0.00181663	-1.91016	4.43965e-06	Tns1,Tns1,Tns1,Tns1,Tns1,Tns1,Tns1,Tns1,Tns1,Tns1,Tns1,Tns1,Tns1,Tns1,Tns1,Tns1,Tns1,Tns1,Tns1,Tns1,Tns1,Tns1,Tns1,Tns1,Tns1,Tns1,Tns1,Tns1,Tns1,Tns1,Tns1,Tns1,Tns1,Tns1,Tns1,Tns1,Tns1,Tns1,Tns1,Tns1,Tns1,Tns1,Tns1,Tns1,Tns1,Tns1,Tns1,Tns1	Intron,Intron,Intron,Intron,Intron,Intron,Intron,Intron,Intron,Intron,Intron,Intron,Intron,Intron,Intron,Promoter,Promoter,Exon,Exon,Exon,Exon,Exon,Exon,Exon,Exon,Exon,Exon,Exon,Exon,Exon,Exon,Exon,Intron,Intron,Intron,Intron,Intron,Intron,Intron,Intron,Intron,Intron,Intron,Intron,Intron,Intron,Intron,Exon
chr1	74036846	74037243	33.1377	33.9646	25.4342	14.4276	42.1489	53.0487	23.3484	20.7309	-0.760938	0.28805	-1.11086	0.0331987	Tns1,Tns1,Tns1,Tns1,Tns1,Tns1,Tns1,Tns1,Tns1,Tns1,Tns1,Tns1,Tns1,Tns1,Tns1	Intron,Intron,Intron,Intron,Intron,Intron,Intron,Intron,Intron,Intron,Intron,Promoter,Promoter,Exon,Exon
chr1	74053034	74053700	11.5262	17.9257	105.861	111.299	13.113	16.5777	85.2931	76.0133	2.90269	7.84457e-10	2.43742	2.66288e-07	Tns1,Tns1,Tns1,Tns1,Tns1,Tns1,Tns1,Tns1,Tns1	Intron,Intron,Intron,Intron,Intron,Intron,Intron,Intron,Intron
chr1	74068383	74069018	44.6638	44.3426	21.3098	20.0956	65.5649	76.2576	27.6369	28.2171	-1.10547	0.0708777	-1.34589	0.0018362	Tns1,Tns1,Tns1,Tns1,Tns1,Tns1,Tns1,Tns1,Tns1,Tns1,Tns1,Tns1,Tns1,Tns1,Tns1,Tns1,Tns1,Tns1,Tns1,Tns1,Tns1,Tns1,Tns1,Tns1,Tns1,Tns1,Tns1,Tns1,Tns1,Tns1	Intron,Intron,Intron,Intron,Intron,Intron,Intron,Intron,Intron,Promoter,Promoter,Exon,Exon,Exon,Exon,Exon,Exon,Exon,Exon,Exon,Intron,Intron,Intron,Intron,Intron,Intron,Intron,Intron,Intron,Exon
chr1	74098002	74099102	49.7065	48.1165	31.6209	46.3744	107.714	110.242	39.5493	37.4308	-0.321489	0.575721	-1.50068	1.69626e-05	Tns1,Tns1,Tns1,Tns1,Tns1,Tns1,Tns1,Tns1	Intron,Intron,Intron,Intron,Intron,Intron,Promoter,Exon
chr1	74116090	74116635	19.4504	12.265	75.6153	85.0198	44.0221	43.931	61.9447	47.7963	2.32463	8.05412e-06	0.321765	0.503952	Tns1,Tns1,Tns1	Intron,Intron,Intron
chr1	74124189	74125646	123.186	120.763	235.095	276.701	269.753	224.628	244.443	264.319	1.07013	3.44174e-05	0.0424425	0.853242	Tns1,Tns1,Tns1,Tns1,Tns1,Tns1,Rufy4,Rufy4,Tns1,Tns1,Tns1,Intergenic,Rufy4,Rufy4	Intron,Intron,Intron,Promoter,Promoter,Promoter,Promoter,Promoter,Exon,Exon,Exon,Intergenic,Promoter,Promoter
chr1	74149156	74149650	93.65	92.4591	4.12447	10.3054	99.284	83.7175	13.8184	9.7896	-3.64681	3.20249e-11	-2.94349	4.29896e-11	Intergenic	Intergenic
chr1	74155059	74155940	54.0288	30.1907	129.233	134.486	56.1985	38.9577	74.8102	70.8306	1.63236	4.52394e-05	0.618762	0.14589	Cxcr2	Promoter
chr1	74156481	74156632	2.16115	0.94346	11.686	16.4887	0.936641	4.97332	6.19447	9.7896	3.14538	0.0281113	1.40907	0.314315	Cxcr2	Promoter
chr1	74178609	74179031	29.5358	35.8515	5.49929	9.79016	72.1214	59.6798	10.483	7.48616	-2.07731	0.00927538	-2.86384	3.34845e-08	Intergenic	Intergenic
chr1	74227226	74227859	43.2231	34.908	142.294	195.288	67.4382	93.6642	137.708	158.361	2.10694	4.52013e-09	0.872933	0.00410491	Intergenic	Intergenic
chr1	74240144	74240577	22.3319	25.4734	80.4271	52.0424	27.1626	12.4333	42.4083	36.2791	1.4699	0.00695012	1.00161	0.104754	Arpc2	Promoter
chr1	74248576	74249839	110.219	97.1764	300.399	308.132	226.667	219.655	277.322	263.743	1.54976	1.81995e-10	0.278609	0.158216	Arpc2	Promoter
chr1	74283754	74285784	592.877	684.952	1301.96	1502.53	987.22	1096.62	1317.04	1216.79	1.13679	7.1374e-16	0.281717	0.0037509	Aamp,Aamp,Aamp,Aamp,Aamp,Pnkd,Aamp,Aamp,Aamp,Aamp,Pnkd,Pnkd,Aamp,Aamp,Aamp,Aamp,Aamp,Aamp	Intron,Intron,Intron,Promoter,Promoter,Promoter,Promoter,Exon,Exon,Exon,Promoter,Promoter,Intron,Intron,Intron,Exon,Exon,Exon
chr1	74294798	74296393	149.12	181.144	1007.06	1039.3	206.061	281.821	691.398	653.024	2.63801	4.27471e-57	1.45848	6.07509e-22	Tmbim1,Tmbim1,Tmbim1	Intron,Exon,Intron
chr1	74297188	74297787	18.73	34.908	109.298	155.097	14.9863	28.1821	106.736	73.7099	2.32359	9.65947e-08	2.05525	9.45656e-06	Tmbim1	Intron
chr1	74303496	74304708	112.38	128.311	248.156	328.228	179.835	130.135	283.516	219.978	1.26501	1.40043e-06	0.704818	0.0037465	Tmbim1,Tmbim1,Tmbim1	Intron,Promoter,Exon
chr1	74304917	74305214	9.365	0.94346	41.2447	22.6719	9.36641	9.11775	29.5429	22.4585	2.57252	0.0088217	1.49491	0.0469721	Tmbim1	Promoter
chr1	74305636	74305868	5.04269	0.94346	18.5601	17.5192	6.55649	0.828886	11.9124	4.60687	2.53712	0.0357108	1.19035	0.400972	Tmbim1	Promoter
chr1	74307552	74307776	5.76308	3.77384	25.4342	27.3094	5.61985	4.14443	13.3419	14.9723	2.45098	0.00899399	1.54042	0.131904	Tmbim1	Promoter
chr1	74351213	74351674	66.2754	50.9469	6.1867	11.336	62.755	52.2198	16.6774	12.093	-2.72285	1.3633e-05	-1.99058	0.000104103	Intergenic	Intergenic
chr1	74368187	74369275	30.9765	33.9646	283.213	325.652	52.4519	48.0754	315.918	268.35	3.23446	5.61461e-28	2.54198	1.04067e-24	Intergenic	Intergenic
chr1	74372759	74373191	35.2988	33.0211	13.7482	21.6414	101.157	75.4287	20.9659	15.5482	-0.941199	0.185521	-2.26539	1.64694e-07	Intergenic	Intergenic
chr1	74374820	74375688	24.4931	15.0954	224.096	315.861	19.6695	13.2622	254.45	242.436	3.74741	1.62929e-25	3.92773	1.71872e-31	Intergenic,Slc11a1,Slc11a1,Slc11a1	Intergenic,Promoter,Promoter,Promoter
chr1	74376362	74376952	12.9669	32.0777	61.867	90.1725	12.1763	9.94664	82.4341	67.3755	1.77996	0.00174793	2.76559	8.17658e-08	Slc11a1	Promoter
chr1	74381220	74382357	52.5881	78.3072	624.17	699.739	69.3115	77.9153	567.033	467.597	3.35603	9.83336e-51	2.81143	5.93188e-47	Intergenic	Intergenic
chr1	74386437	74387386	139.755	140.576	374.639	512.695	297.852	232.917	402.641	402.525	1.66459	3.78761e-13	0.60401	0.000460284	Intergenic	Intergenic
chr1	74389729	74392875	397.652	338.702	961.689	1022.3	716.531	620.836	792.893	836.723	1.42721	8.04608e-21	0.286154	0.0146842	Intergenic,Ctdsp1	Intergenic,Promoter
chr1	74397156	74398512	306.163	280.208	792.585	905.847	468.321	463.348	739.525	628.838	1.53334	3.45198e-21	0.556041	1.64777e-05	Intergenic	Intergenic
chr1	74434358	74435102	18.73	21.6996	118.922	140.669	18.7328	15.7488	119.124	103.079	2.69046	1.14743e-10	2.69287	1.14965e-10	Usp37,Usp37,Usp37,Usp37,Usp37	Exon,Exon,Exon,Exon,Exon
chr1	74435593	74435975	9.365	10.3781	59.1174	70.0769	5.61985	8.28886	43.8378	51.8273	2.71617	5.4069e-06	2.77162	1.89531e-05	Usp37,Usp37,Usp37,Usp37,Usp37	Exon,Exon,Exon,Exon,Exon
chr1	74437468	74438695	85.7258	90.5722	251.593	321.529	96.4741	84.5464	227.766	206.157	1.7043	1.2347e-10	1.26404	2.35698e-07	Usp37,Usp37,Usp37,Usp37,Usp37	Exon,Exon,Exon,Exon,Exon
chr1	74439337	74439783	5.04269	17.9257	42.6195	47.405	4.68321	6.63109	28.5899	44.3411	2.00549	0.00711465	2.67757	0.000339528	Usp37,Usp37,Usp37,Usp37,Usp37,Usp37,Usp37,Usp37,Usp37,Usp37	Exon,Exon,Exon,Exon,Exon,Intron,Intron,Intron,Intron,Intron
chr1	74452815	74453033	5.76308	3.77384	21.9972	23.7025	19.6695	21.551	25.2544	16.6999	2.2453	0.0234658	0.02889	0.971532	Usp37,Usp37,Usp37,Usp37,Usp37,Usp37,Usp37,Usp37,Usp37,Usp37	Exon,Exon,Exon,Exon,Exon,Intron,Intron,Intron,Intron,Intron
chr1	74531596	74532146	20.1708	36.795	3.43706	10.8207	68.3748	89.5197	10.483	14.3965	-1.96598	0.0321068	-2.67599	1.27628e-08	Usp37	Intron
chr1	74559123	74559396	5.76308	7.54768	19.2475	29.3705	2.80992	5.80221	20.4894	28.2171	1.88192	0.0435227	2.48192	0.00535742	Intergenic	Intergenic
chr1	74570201	74570630	11.5262	17.9257	25.4342	56.1646	17.7962	19.0644	49.0793	47.2204	1.48765	0.0444788	1.38464	0.0102843	Zfp142,Zfp142,Zfp142,Zfp142,Zfp142	Exon,Exon,Exon,Exon,Exon
chr1	74587238	74588675	385.406	425.501	840.017	965.104	734.327	785.784	925.359	768.195	1.15718	1.31218e-13	0.156759	0.217874	Zfp142,Zfp142,Zfp142,Zfp142,Zfp142,Zfp142,Zfp142,Zfp142,Bcs1l,Bcs1l,Zfp142,Zfp142,Zfp142,Zfp142,Zfp142,Zfp142,Zfp142,Zfp142,Intergenic	Intron,Intron,Intron,Intron,Promoter,Promoter,Promoter,Promoter,Promoter,Promoter,Exon,Exon,Exon,Exon,Intron,Intron,Exon,Exon,Intergenic
chr1	74600885	74601839	74.92	92.4591	164.291	229.811	132.066	135.108	180.116	160.665	1.24284	9.49235e-05	0.3519	0.173971	Rnf25,Rnf25,Rnf25,Stk36,Stk36,Rnf25,Rnf25,Intergenic	Intron,Promoter,Promoter,Promoter,Promoter,Exon,Exon,Intergenic
chr1	74661391	74662230	147.679	155.671	295.587	379.755	241.653	231.259	313.059	253.378	1.15783	1.21003e-06	0.262723	0.202567	Intergenic,Ttll4,Ttll4,Ttll4	Intergenic,Promoter,Promoter,Promoter
chr1	74672290	74672537	34.5785	33.0211	13.7482	5.66799	27.1626	25.6955	13.8184	4.03101	-1.82206	0.0216177	-1.54829	0.0520818	Ttll4	Promoter
chr1	74672685	74672974	30.9765	26.4169	13.0608	5.66799	24.3527	24.8666	6.19447	5.18273	-1.637	0.052682	-2.10899	0.00705777	Ttll4	Promoter
chr1	74677944	74678162	4.32231	5.66076	26.809	22.6719	2.80992	6.63109	20.9659	12.093	2.31842	0.0151028	1.79733	0.0760174	Ttll4	Promoter
chr1	74678700	74678964	24.4931	13.2084	7.56153	8.24435	17.7962	34.8132	2.38249	9.21374	-1.26015	0.203973	-2.20927	0.0104717	Ttll4	Promoter
chr1	74701883	74702609	15.8485	21.6996	79.7397	86.5656	20.6061	10.7755	76.7162	100.775	2.15909	1.35777e-05	2.51115	1.59198e-07	Intergenic	Intergenic
chr1	74712151	74712400	5.76308	4.7173	32.9957	28.8552	9.36641	7.45998	16.2009	26.4895	2.55138	0.00327475	1.34293	0.106976	Intergenic,Cyp27a1	Intergenic,Promoter
chr1	74712540	74714247	46.825	53.7772	196.6	180.345	66.5015	79.5731	137.708	199.247	1.90938	1.74804e-09	1.20124	8.36536e-05	Intergenic,Cyp27a1,Cyp27a1	Intergenic,Promoter,Promoter
chr1	74715448	74716263	29.5358	16.9823	109.986	136.547	11.2397	25.6955	79.5752	86.9547	2.38838	4.05694e-08	2.15814	7.25832e-06	Cyp27a1	Promoter
chr1	74726796	74726980	10.8058	11.3215	6.87411	13.3971	16.8595	20.7222	5.71798	5.18273	-0.115872	0.924282	-1.78516	0.0408408	Intergenic	Intergenic
chr1	74772880	74773679	37.46	50.0034	182.164	191.681	121.763	120.189	163.915	166.423	2.10586	1.68378e-10	0.449235	0.0845595	Wnt6	Promoter
chr1	74775652	74776122	14.4077	17.9257	54.9929	56.1646	17.7962	29.8399	40.5023	46.6445	1.78882	0.00235715	0.86369	0.124467	Gm29539,Gm29539,Gm29539,Gm29539	Exon,Exon,Intron,Intron
chr1	74779402	74779667	7.92423	13.2084	22.6846	26.7941	1.87328	3.31555	27.1604	27.6412	1.24254	0.151923	3.38473	0.000350914	Gm29539,Gm29539	Promoter,Promoter
chr1	74784039	74784728	35.2988	47.173	83.8642	95.3252	49.642	43.931	88.6286	71.9823	1.12793	0.0108621	0.782669	0.0523488	Intergenic	Intergenic
chr1	74787893	74788200	26.6542	12.265	55.6803	56.1646	31.8458	38.9577	44.3143	43.7653	1.50363	0.0139669	0.312788	0.555833	Gm32099	Intron
chr1	74800403	74801140	48.9862	54.7207	26.1216	27.3094	113.334	85.3753	40.0258	43.7653	-0.954261	0.088913	-1.24505	0.000805993	Intergenic	Intergenic
chr1	74806307	74807749	134.712	148.123	127.859	155.097	251.957	241.206	105.783	124.385	0.0046622	0.98962	-1.10148	5.33117e-07	Intergenic	Intergenic
chr1	74807770	74808647	72.0385	56.6076	140.232	126.242	104.904	135.108	121.03	124.385	1.04391	0.00367076	0.0293465	0.931114	Intergenic	Intergenic
chr1	74816606	74817562	97.2519	88.6853	195.912	189.62	133.003	156.66	206.8	178.516	1.04951	0.000308762	0.411169	0.0990324	Intergenic	Intergenic
chr1	74854489	74855385	59.0715	58.4946	28.8713	31.4316	130.193	113.557	35.7373	44.917	-0.961587	0.0671044	-1.59862	2.5801e-06	Cdk5r2	Promoter
chr1	74947926	74948467	31.6969	25.4734	12.3734	10.3054	53.3886	52.2198	27.1604	21.3068	-1.34116	0.0899278	-1.11969	0.0237041	Ihh,Ihh,Ihh	Intron,Exon,Exon
chr1	74951606	74951875	12.9669	9.4346	3.43706	8.24435	24.3527	24.0377	4.28848	1.72758	-0.927763	0.46528	-2.98146	0.000730842	Ihh,Ihh,Ihh,Ihh,Intergenic	Promoter,Promoter,Exon,Exon,Intergenic
chr1	74997230	74997637	3.60192	11.3215	61.867	32.9774	14.9863	11.6044	39.0728	40.886	2.70399	0.000497908	1.59242	0.00898451	Nhej1	Intron
chr1	75124170	75125732	415.662	393.423	781.587	873.901	484.244	580.221	816.241	750.92	1.03276	3.05756e-11	0.556742	6.67265e-06	Nhej1,Nhej1,Nhej1,Intergenic,Slc23a3,Slc23a3,Slc23a3	Intron,Promoter,Exon,Intergenic,Exon,Exon,Exon
chr1	75159185	75159395	9.365	7.54768	15.8105	15.4581	0.936641	1.65777	20.0129	23.6102	0.881085	0.398511	4.05243	0.000812202	Intergenic	Intergenic
chr1	75179231	75180768	155.603	130.198	385.638	377.179	290.359	287.624	365.474	331.695	1.41178	1.34394e-10	0.271589	0.117276	Abcb6,Abcb6,Abcb6,Abcb6,Abcb6,Abcb6,Intergenic	Intron,Intron,Promoter,Promoter,Exon,Exon,Intergenic
chr1	75187913	75188397	28.095	27.3604	92.1131	139.639	24.3527	12.4333	134.849	134.175	2.06569	1.80876e-06	2.88559	7.2694e-13	Atg9a,Atg9a,Atg9a,Atg9a,Atg9a,Atg9a,Atg9a,Atg9a,Atg9a	Intron,Intron,Intron,Exon,Exon,Exon,Intron,Intron,Intron
chr1	75189801	75190332	13.6873	11.3215	56.3677	32.9774	7.49313	9.94664	49.5558	29.9446	1.8263	0.00828778	2.18627	0.00126237	Atg9a,Atg9a,Atg9a,Atg9a,Atg9a,Atg9a,Atg9a,Atg9a,Atg9a,Atg9a,Atg9a,Atg9a	Intron,Intron,Intron,Exon,Exon,Exon,Intron,Intron,Intron,Exon,Exon,Exon
chr1	75191377	75192920	326.334	278.321	826.956	889.359	564.795	610.06	784.792	830.964	1.50228	1.20546e-20	0.458246	3.98383e-05	Atg9a,Atg9a,Atg9a,Atg9a,Atg9a,Atg9a,Ankzf1,Ankzf1,Ankzf1,Ankzf1,Atg9a,Ankzf1,Atg9a,Atg9a,Intergenic	Promoter,Intron,Intron,Intron,Promoter,Promoter,Promoter,Promoter,Promoter,Promoter,Exon,Promoter,Exon,Exon,Intergenic
chr1	75208934	75209561	24.4931	33.0211	69.4285	64.9242	51.5153	43.931	38.5963	45.4928	1.2311	0.0165896	-0.183032	0.723322	Glb1l,Glb1l,Glb1l,Glb1l,Glb1l,Glb1l,Glb1l,Glb1l,Glb1l,Glb1l,Glb1l,Glb1l,Glb1l,Glb1l,Glb1l,Glb1l,Glb1l,Glb1l,Glb1l,Glb1l,Glb1l,Glb1l,Glb1l,Glb1l,Glb1l,Glb1l,Glb1l,Glb1l,Glb1l,Glb1l,Glb1l,Glb1l,Glb1l,Glb1l,Glb1l,Glb1l,Glb1l,Glb1l	Intron,Intron,Intron,Intron,Intron,Intron,Intron,Intron,Intron,Exon,Exon,Exon,Exon,Exon,Exon,Exon,Exon,Exon,Intron,Intron,Intron,Intron,Intron,Intron,Intron,Intron,Intron,Exon,Exon,Exon,Exon,Exon,Exon,Exon,Exon,Exon,Intron,Intron
chr1	75217392	75217690	25.2135	31.1342	11.686	10.8207	45.8954	40.6154	21.4424	15.5482	-1.32295	0.095749	-1.21958	0.0281082	Tuba4a,Tuba4a,Tuba4a,Tuba4a	Exon,Exon,Intron,Intron
chr1	75218012	75219986	247.092	179.257	480.501	502.39	411.186	391.234	487.457	511.362	1.19938	1.19466e-08	0.315968	0.0246062	Tuba4a,Tuba4a,Tuba4a,Tuba4a,Tuba4a,Tuba4a,Intergenic,A630095N17Rik	Intron,Intron,Promoter,Promoter,Exon,Exon,Intergenic,Exon
chr1	75230418	75231464	26.6542	22.6431	129.921	129.848	31.8458	33.1555	87.1991	114.02	2.39128	2.25202e-09	1.62773	3.42176e-05	A630095N17Rik,A630095N17Rik	Intron,Promoter
chr1	75235992	75237446	224.76	255.678	583.612	639.452	339.064	376.314	576.086	529.214	1.35162	5.17696e-14	0.627122	5.90054e-06	Intergenic,Dnajb2,Dnajb2,Dnajb2	Intergenic,Promoter,Promoter,Promoter
chr1	75254131	75254713	34.5785	32.0777	59.8048	87.0809	32.7824	48.9043	72.4277	58.7376	1.14184	0.0222008	0.680283	0.136498	Ptprn,Ptprn,Ptprn,Ptprn,Ptprn,Ptprn,Ptprn,Ptprn,Ptprn,Ptprn,Ptprn,Ptprn,Ptprn,Ptprn,Ptprn,Ptprn,Ptprn,Ptprn,Ptprn,Ptprn	Exon,Exon,Exon,Exon,Exon,Intron,Intron,Intron,Intron,Intron,Exon,Exon,Exon,Exon,Exon,Intron,Intron,Intron,Intron,Intron
chr1	75262733	75263244	11.5262	16.0388	51.5559	34.0079	14.0496	22.3799	26.6839	34.5515	1.63996	0.0171945	0.741141	0.262688	Ptprn,Ptprn,Ptprn,Ptprn,Ptprn,Ptprn,Ptprn,Ptprn	Intron,Intron,Intron,Intron,Intron,Promoter,Promoter,Promoter
chr1	75316428	75318547	1192.96	1261.41	2542.73	3038.56	1944.47	2039.89	2727	2695.59	1.18643	7.41525e-23	0.444268	3.79178e-11	Dnpep,Dnpep,Dnpep,Dnpep,Dnpep,Dnpep,Dnpep,Dnpep,Dnpep,Dnpep,Dnpep,Dnpep,Dnpep,Dnpep,Dnpep,Dnpep,Dnpep,Dnpep,Dnpep,Dnpep,Dnpep,Dnpep,Dnpep,Dnpep,Dnpep,Dnpep,Dnpep,Dnpep,Dnpep,Dnpep,Dnpep,Dnpep,Intergenic	Promoter,Exon,Exon,Exon,Exon,Promoter,Intron,Intron,Intron,Intron,Exon,Exon,Exon,Exon,Intron,Intron,Intron,Intron,Promoter,Promoter,Exon,Exon,Exon,Exon,Intron,Intron,Intron,Intron,Exon,Exon,Exon,Exon,Intergenic
chr1	75413839	75414061	14.4077	6.60422	3.43706	2.06109	24.3527	32.3266	6.67097	13.2447	-1.95803	0.169573	-1.52266	0.0358516	Speg	Promoter
chr1	75423325	75423430	3.60192	6.60422	6.1867	4.12217	10.3031	17.4066	0.476498	4.03101	0.0195158	0.991066	-2.66501	0.0262702	Intergenic	Intergenic
chr1	75445601	75446561	67.7162	54.7207	75.6153	114.906	161.102	153.344	77.1927	75.4375	0.638206	0.145272	-1.04201	0.000149533	Intergenic	Intergenic
chr1	75449619	75449788	5.76308	6.60422	4.12447	4.12217	15.9229	11.6044	2.85899	2.87929	-0.582396	0.719533	-2.2599	0.0340233	Intergenic,Asic4	Intergenic,Promoter
chr1	75450388	75450614	11.5262	17.9257	6.87411	4.63744	18.7328	29.8399	9.05346	4.03101	-1.3587	0.227905	-1.88028	0.0214196	Intergenic,Asic4	Intergenic,Promoter
chr1	75486516	75488232	161.366	183.031	99.6746	107.692	325.015	309.175	129.131	122.658	-0.728809	0.01655	-1.3314	2.91811e-12	Obsl1,Obsl1,Obsl1,Obsl1,Obsl1,Obsl1,Obsl1,Obsl1,Obsl1,Obsl1,Obsl1,Obsl1,Obsl1,Obsl1,Obsl1,Obsl1,Obsl1,Obsl1,Obsl1,Obsl1,Obsl1,Obsl1,Obsl1,Obsl1,Obsl1,Obsl1,Obsl1,Obsl1,Obsl1,Obsl1,Obsl1,Obsl1,Obsl1,Obsl1	Intron,Intron,Exon,Exon,Exon,Exon,Intron,Intron,Intron,Intron,Exon,Exon,Exon,Exon,Intron,Intron,Intron,Intron,Exon,Exon,Exon,Exon,Intron,Intron,Intron,Intron,Exon,Exon,Exon,Exon,Intron,Intron,Intron,Intron
chr1	75498614	75499280	172.172	172.653	6.1867	10.8207	100.221	97.8086	17.6304	20.1551	-4.30821	1.25646e-23	-2.39295	1.79903e-09	Obsl1,Obsl1,Obsl1,Obsl1,Obsl1,Obsl1	Intron,Intron,Intron,Intron,Intron,Intron
chr1	75505197	75506517	74.92	127.367	38.495	47.405	160.166	156.66	53.3678	33.9757	-1.22616	0.00614923	-1.85092	5.67391e-09	Obsl1,Obsl1,Obsl1,Obsl1,Obsl1,Obsl1,Obsl1,Obsl1,Obsl1,Obsl1,Obsl1,Obsl1,Obsl1,Obsl1,Obsl1,Obsl1,Obsl1,Obsl1,Inha	Intron,Intron,Intron,Intron,Intron,Intron,Exon,Exon,Exon,Exon,Exon,Exon,Promoter,Promoter,Promoter,Promoter,Promoter,Promoter,Promoter
chr1	75520950	75522306	185.859	183.031	634.481	685.311	384.96	359.737	667.574	598.893	1.83922	2.86929e-25	0.767914	4.22295e-09	Intergenic,Stk11ip	Intergenic,Promoter
chr1	75523217	75523408	1.44077	5.66076	21.3098	20.6109	5.61985	4.97332	10.9595	14.3965	2.61137	0.0192113	1.2588	0.230735	Stk11ip	Promoter
chr1	76540634	76540784	3.60192	9.4346	11.686	8.24435	0	2.48666	18.5834	19.5792	0.627588	0.636632	3.87833	0.00230846	Intergenic	Intergenic
chr1	77213591	77213937	3.60192	3.77384	19.2475	35.0385	4.68321	7.45998	29.0664	17.8516	2.88673	0.00348731	1.94475	0.0227402	Intergenic	Intergenic
chr1	77279604	77279921	9.365	5.66076	61.867	56.1646	2.80992	1.65777	68.1392	59.8893	2.94979	5.70342e-06	4.86029	4.50665e-09	Intergenic	Intergenic
chr1	77280422	77281302	7.92423	9.4346	160.854	142.215	7.49313	7.45998	171.539	159.513	4.13613	2.53238e-18	4.4691	5.22116e-22	Intergenic	Intergenic
chr1	77281760	77281939	2.88154	2.83038	13.0608	8.75962	0	0	16.6774	19.0033	1.92899	0.169573	6.78156	0.000193269	Intergenic	Intergenic
chr1	77514689	77515373	32.4173	35.8515	46.744	62.8631	27.1626	25.6955	53.3678	66.2237	0.688662	0.209978	1.17702	0.0142631	Epha4,Epha4,Epha4,Epha4,Epha4,Epha4,Epha4,Epha4,Epha4,Intergenic	Intron,Intron,Intron,Promoter,Promoter,Promoter,Exon,Exon,Exon,Intergenic
chr1	78189467	78189921	14.4077	13.2084	37.1202	55.1341	18.7328	7.45998	25.2544	25.9136	1.74114	0.00841822	0.977399	0.197586	Pax3	Intron
chr1	78196589	78197343	42.5027	22.6431	67.3663	77.806	24.3527	27.3533	54.7973	46.6445	1.1436	0.0285111	0.971986	0.0560753	Pax3,Pax3,Pax3,Intergenic	Intron,Promoter,Exon,Intergenic
chr1	78436055	78436395	28.8154	26.4169	6.1867	4.63744	43.0855	54.7065	10.9595	12.093	-2.36238	0.00685511	-2.08874	0.000170395	Farsb,Farsb,Farsb	Intron,Intron,Intron
chr1	78436510	78436777	20.8912	18.8692	4.81188	2.06109	23.416	31.4977	12.8654	4.03101	-2.56341	0.017496	-1.68461	0.0323643	Farsb,Farsb,Farsb	Intron,Intron,Intron
chr1	78487865	78489792	263.661	296.247	739.655	775.999	496.42	473.294	817.194	746.313	1.43963	1.53071e-18	0.690585	2.14579e-09	Farsb,Farsb,Farsb,Farsb,Farsb,Farsb,Farsb,Farsb,Farsb,Intergenic	Intron,Intron,Intron,Promoter,Promoter,Promoter,Exon,Exon,Exon,Intergenic
chr1	78490037	78490449	17.2892	23.5865	55.6803	45.8592	14.9863	19.8933	42.4083	52.979	1.31906	0.0283747	1.44519	0.0093728	Intergenic	Intergenic
chr1	78532272	78532417	0.720385	0	13.0608	13.9123	2.80992	10.7755	6.67097	4.60687	5.0545	0.0120299	-0.275954	0.842948	Mogat1	Promoter
chr1	78538234	78539069	147.679	179.257	114.11	113.36	399.009	435.994	111.977	127.841	-0.520671	0.0968164	-1.80313	1.50583e-24	Gm39665	Exon
chr1	78590916	78592103	212.513	218.883	26.1216	41.2217	475.814	446.77	47.1733	36.2791	-2.66406	3.70445e-16	-3.45717	2.00859e-64	Gm39665	Promoter
chr1	78657458	78659026	214.675	264.169	736.218	782.698	483.307	557.841	673.292	701.972	1.67055	6.58819e-22	0.399522	0.00135929	Intergenic,Acsl3,Utp14b,Utp14b	Intergenic,Promoter,Promoter,Promoter
chr1	78666053	78666252	4.32231	2.83038	19.2475	27.8247	0	3.31555	25.7309	27.0654	2.7032	0.00885763	3.93188	0.00032495	Utp14b	Promoter
chr1	78682152	78682709	23.7727	22.6431	24.0594	23.1872	84.2977	82.0598	22.8719	19.5792	0.024139	0.976511	-1.96693	2.60012e-06	Utp14b	Promoter
chr1	78702333	78703504	89.3277	92.4591	230.283	214.353	83.3611	83.7175	157.244	165.847	1.29055	2.70491e-06	0.950906	0.000529139	Intergenic	Intergenic
chr1	78710742	78710940	17.2892	16.0388	2.74965	2.06109	27.1626	24.8666	4.76498	2.87929	-2.8053	0.0181953	-2.75181	0.000771263	Intergenic	Intergenic
chr1	78724504	78725421	96.5315	109.441	67.3663	80.8976	166.722	219.655	90.5346	97.3201	-0.469479	0.230895	-1.04343	6.17721e-05	Gm33693	Exon
chr1	78725741	78725947	10.8058	8.49114	5.49929	3.6069	16.8595	25.6955	7.14747	4.03101	-1.09615	0.417448	-1.91985	0.0245679	Gm33693	Exon
chr1	78812282	78812566	19.4504	33.9646	6.1867	10.3054	26.226	38.9577	9.05346	1.15172	-1.67641	0.0558636	-2.64334	0.00156301	Gm29536	Intron
chr1	79559266	79559905	51.1473	39.6253	35.058	28.8552	86.171	92.8353	46.6968	35.1274	-0.51332	0.385819	-1.12583	0.00361934	Intergenic	Intergenic
chr1	79561029	79561764	39.6212	39.6253	43.9943	31.9468	138.623	136.766	47.6498	39.1584	-0.0661029	0.918407	-1.66187	1.46154e-07	Intergenic	Intergenic
chr1	79640260	79640631	12.2465	12.265	35.058	45.8592	15.9229	18.2355	30.4959	21.8826	1.72569	0.013252	0.618076	0.376421	Ap1s3,Ap1s3	Intron,Intron
chr1	79642868	79642984	3.60192	0.94346	20.6223	10.8207	7.49313	5.80221	6.67097	5.18273	2.73547	0.0389402	-0.159377	0.904949	Ap1s3,Ap1s3	Intron,Intron
chr1	79643520	79643730	12.2465	12.265	7.56153	4.63744	29.9725	27.3533	7.14747	10.3655	-1.01692	0.393151	-1.7175	0.0150566	Ap1s3,Ap1s3	Intron,Intron
chr1	79643845	79644036	19.4504	17.9257	2.74965	8.24435	20.6061	26.5244	7.62397	2.30343	-1.74087	0.102952	-2.22511	0.0101217	Ap1s3,Ap1s3	Intron,Intron
chr1	79669523	79670040	12.2465	11.3215	70.116	92.2336	6.55649	14.92	52.8913	59.3134	2.78302	2.54725e-07	2.36867	5.03027e-05	Ap1s3,Ap1s3	Intron,Intron
chr1	79683104	79683241	1.44077	3.77384	13.0608	6.69853	4.68321	1.65777	11.436	19.0033	1.9467	0.19916	2.28017	0.0405098	Intergenic	Intergenic
chr1	79684018	79684403	9.365	13.2084	57.7426	63.8937	19.6695	26.5244	55.2738	57.5859	2.44458	4.75842e-05	1.28389	0.0101355	Intergenic	Intergenic
chr1	79701571	79702156	110.219	133.028	16.4979	18.0345	117.08	92.0064	20.4894	25.3378	-2.81089	2.33928e-11	-2.1929	1.93232e-08	Intergenic	Intergenic
chr1	79703608	79703830	20.1708	17.9257	6.87411	5.66799	25.2893	29.011	4.28848	4.60687	-1.60956	0.105429	-2.61286	0.000826919	Wdfy1,Wdfy1,Wdfy1	Exon,Exon,Exon
chr1	79736539	79736800	30.2562	28.3038	11.686	12.3665	34.6557	32.3266	10.0065	6.33444	-1.28332	0.0965634	-2.02481	0.00267841	Wdfy1,Wdfy1,Wdfy1,Wdfy1	Intron,Intron,Intron,Intron
chr1	79738797	79739066	1.44077	5.66076	25.4342	19.065	1.87328	9.11775	12.8654	21.3068	2.69645	0.0139003	1.61226	0.114288	Wdfy1,Wdfy1,Wdfy1,Wdfy1	Intron,Intron,Intron,Intron
chr1	79741048	79741537	12.9669	28.3038	59.1174	89.142	20.6061	25.6955	79.5752	69.103	1.86897	0.000965135	1.68031	0.000210979	Wdfy1,Wdfy1,Wdfy1,Wdfy1	Intron,Intron,Intron,Intron
chr1	79753924	79754296	11.5262	13.2084	36.4328	43.7981	36.529	10.7755	42.8848	44.917	1.7038	0.0142732	0.903575	0.156182	Wdfy1,Wdfy1,Wdfy1,Wdfy1	Intron,Intron,Intron,Intron
chr1	79759974	79760437	11.5262	8.49114	66.6789	64.9242	14.0496	8.28886	54.3208	47.7963	2.70334	4.83194e-06	2.20399	0.000174292	Wdfy1,Wdfy1,Wdfy1,Wdfy1	Intron,Intron,Intron,Intron
chr1	79760707	79763246	181.537	157.558	534.119	604.414	300.662	320.779	506.517	517.121	1.74471	1.63596e-19	0.718934	3.08228e-07	Wdfy1,Wdfy1,Wdfy1,Wdfy1,Wdfy1,Wdfy1,Wdfy1,Wdfy1,Wdfy1,Wdfy1,Wdfy1,Wdfy1,Wdfy1,Wdfy1	Intron,Intron,Intron,Intron,Promoter,Promoter,Promoter,Exon,Exon,Exon,Exon,Intron,Intron,Exon
chr1	79765909	79766590	45.3842	33.9646	37.8076	30.401	87.1076	94.4931	34.7843	33.9757	-0.22629	0.722042	-1.40135	0.000240279	Wdfy1	Intron
chr1	79775702	79776610	127.508	130.198	362.953	519.394	307.218	350.619	399.305	397.918	1.77834	7.82978e-14	0.275768	0.0900269	Wdfy1,Mrpl44,Wdfy1,Wdfy1	Intron,Promoter,Promoter,Exon
chr1	79778043	79778360	5.04269	8.49114	28.8713	40.1912	3.74657	2.48666	22.3954	17.8516	2.37425	0.00371035	2.70239	0.00673261	Wdfy1	Promoter
chr1	79848388	79849155	10.8058	6.60422	138.857	182.921	14.0496	11.6044	133.896	173.909	4.18019	1.26435e-18	3.5887	3.87458e-18	Serpine2,Serpine2	Intron,Intron
chr1	79856808	79857280	36.7396	27.3604	5.49929	11.8512	51.5153	57.1932	3.33549	18.4275	-1.86918	0.0214849	-2.32911	0.0522598	Serpine2,Serpine2,Serpine2	Intron,Intron,Promoter
chr1	79858046	79860136	237.007	269.83	192.475	214.353	514.216	531.316	263.98	247.043	-0.313775	0.219643	-1.03201	2.18017e-13	Serpine2,Serpine2,Serpine2,Serpine2,Serpine2,Intergenic	Intron,Promoter,Promoter,Exon,Exon,Intergenic
chr1	79936260	79936734	18.73	33.9646	2.06223	2.57636	58.0718	96.9797	9.05346	3.45515	-3.48878	0.000654344	-3.60536	1.76103e-10	Intergenic	Intergenic
chr1	80008504	80008772	16.5688	6.60422	7.56153	1.54581	25.2893	35.6421	2.38249	8.06202	-1.38464	0.317573	-2.57348	0.00118536	Intergenic	Intergenic
chr1	80015257	80015983	67.7162	100.007	12.3734	19.5803	198.568	162.462	24.7779	40.3101	-2.37411	4.03135e-06	-2.48109	8.93296e-15	Intergenic	Intergenic
chr1	80018043	80018144	13.6873	15.0954	0.687411	4.63744	13.113	11.6044	0.952996	0.575859	-2.38622	0.0703325	-3.9927	0.00416723	Intergenic	Intergenic
chr1	80018460	80018952	32.4173	36.795	6.87411	7.2138	47.7687	54.7065	10.9595	6.33444	-2.29341	0.00282426	-2.55401	9.67122e-06	Intergenic	Intergenic
chr1	80025828	80026203	23.7727	9.4346	47.4314	30.401	5.61985	13.2622	40.0258	33.9757	1.20553	0.105611	1.95684	0.00442892	Intergenic	Intergenic
chr1	80026328	80026547	5.04269	5.66076	24.0594	24.2178	7.49313	9.11775	28.1134	27.6412	2.17773	0.0217313	1.74346	0.0188432	Intergenic	Intergenic
chr1	80107841	80108115	6.48346	4.7173	22.6846	22.1567	9.36641	5.80221	41.9318	37.4308	1.98984	0.0406024	2.39852	0.000405622	Intergenic	Intergenic
chr1	80213557	80214176	30.2562	42.4557	20.6223	26.7941	105.84	82.0598	20.0129	21.8826	-0.607274	0.367109	-2.16537	1.0913e-07	LOC108167342,Fam124b,Fam124b,Fam124b,Fam124b	Intron,Exon,Exon,Promoter,Promoter
chr1	80321310	80321807	52.5881	43.3992	10.3112	9.79016	63.6916	74.5998	22.3954	12.093	-2.25953	0.000458855	-1.99292	4.61651e-05	Cul3,Cul3,Cul3,Cul3	Intron,Intron,Intron,Exon
chr1	80324392	80324693	33.1377	37.7384	15.1231	4.63744	29.0359	29.011	8.57696	8.63788	-1.86769	0.021154	-1.75371	0.0116865	Cul3,Cul3	Intron,Intron
chr1	80335291	80335414	0.720385	0	14.4356	12.3665	5.61985	1.65777	5.71798	5.75859	5.04371	0.0123658	0.672653	0.654266	Cul3,Cul3	Intron,Intron
chr1	80389833	80389997	4.32231	1.88692	19.2475	19.5803	12.1763	2.48666	29.5429	11.5172	2.61139	0.0213845	1.50895	0.124016	Intergenic	Intergenic
chr1	80401971	80402296	8.64462	7.54768	56.3677	59.7715	8.42977	2.48666	42.4083	42.6135	2.83672	8.85907e-06	2.98858	4.27438e-05	Intergenic	Intergenic
chr1	80404196	80404717	34.5785	36.795	12.3734	17.004	95.5374	113.557	29.5429	27.0654	-1.2727	0.0707194	-1.88453	4.37227e-07	Intergenic	Intergenic
chr1	80412499	80412912	24.4931	28.3038	4.81188	6.69853	59.0084	62.1665	10.9595	4.03101	-2.18509	0.0135922	-2.98945	2.25123e-07	Intergenic	Intergenic
chr1	80418411	80419162	70.5977	65.0988	63.9293	48.9508	90.8542	125.162	34.3079	45.4928	-0.270926	0.574547	-1.44313	0.000109047	Intergenic	Intergenic
chr1	80440945	80441255	20.1708	16.0388	0.687411	8.75962	41.2122	42.2732	9.05346	6.9103	-1.90169	0.117766	-2.38005	0.000110611	1700016L21Rik	Promoter
chr1	80447646	80448174	18.0096	34.908	63.2418	61.3173	18.7328	33.9843	62.4212	69.103	1.25027	0.0264954	1.31005	0.00696475	1700016L21Rik	Promoter
chr1	80451956	80452488	8.64462	6.60422	79.0523	73.1686	4.68321	13.2622	55.2738	71.4065	3.3047	2.16631e-08	2.79667	2.33398e-06	1700016L21Rik	Promoter
chr1	80452985	80453425	7.92423	5.66076	91.4257	73.6838	4.68321	3.31555	61.9447	89.8339	3.58304	1.65139e-09	4.25518	2.511e-10	1700016L21Rik	Promoter
chr1	80453860	80454359	10.0854	12.265	84.5516	58.741	8.42977	7.45998	58.1327	55.2824	2.68589	3.20254e-06	2.83882	1.74782e-06	1700016L21Rik	Promoter
chr1	80475066	80475206	1.44077	0	13.0608	10.3054	0.936641	0	15.2479	6.33444	3.90014	0.029682	4.61085	0.0199571	Intergenic	Intergenic
chr1	80484550	80484676	10.8058	5.66076	7.56153	11.336	13.113	14.92	2.85899	2.87929	0.192349	0.8844	-2.28962	0.0298846	Intergenic	Intergenic
chr1	80496367	80496727	20.8912	25.4734	36.4328	37.0996	11.2397	13.2622	50.9853	54.7066	0.670006	0.310692	2.10506	0.000169192	Intergenic	Intergenic
chr1	80561748	80562828	109.498	83.968	9.62376	10.3054	204.188	232.088	14.7714	23.6102	-3.27862	5.06775e-11	-3.52312	2.06139e-29	Dock10,Dock10,Dock10,Dock10,Dock10,Dock10,Dock10,Dock10,Dock10,Dock10,Dock10,Dock10,Dock10,Dock10	Intron,Intron,Intron,Intron,Intron,Intron,Intron,Intron,Intron,Intron,Intron,Intron,Intron,Intron
chr1	80564310	80564577	16.5688	12.265	6.87411	1.03054	33.7191	33.1555	2.38249	5.18273	-1.90852	0.139929	-3.16841	3.18676e-05	Dock10,Dock10,Dock10,Dock10,Dock10,Dock10,Dock10,Dock10,Dock10,Dock10,Dock10,Dock10,Dock10,Dock10,Dock10,Dock10,Dock10,Dock10,Dock10,Dock10,Dock10,Dock10,Dock10,Dock10,Dock10,Dock10,Dock10,Dock10,Dock10,Dock10,Dock10,Dock10,Dock10,Dock10,Dock10,Dock10,Dock10,Dock10,Dock10,Dock10,Dock10,Dock10	Intron,Intron,Intron,Intron,Intron,Intron,Intron,Intron,Intron,Intron,Intron,Intron,Intron,Intron,Exon,Exon,Exon,Exon,Exon,Exon,Exon,Exon,Exon,Exon,Exon,Exon,Exon,Exon,Intron,Intron,Intron,Intron,Intron,Intron,Intron,Intron,Intron,Intron,Intron,Intron,Intron,Intron
chr1	80609420	80610085	20.1708	48.1165	107.924	123.665	18.7328	16.5777	83.8636	80.0444	1.78343	0.000117737	2.21754	1.0364e-06	Dock10,Dock10,Dock10,Dock10,Dock10,Dock10,Dock10,Dock10,Dock10,Dock10,Dock10,Dock10,Dock10	Intron,Intron,Intron,Intron,Intron,Intron,Intron,Intron,Intron,Intron,Intron,Intron,Intron
chr1	80614303	80614420	3.60192	4.7173	9.62376	12.8818	0.936641	0.828886	8.57696	9.21374	1.44693	0.269394	3.33605	0.043519	Dock10,Dock10,Dock10,Dock10,Dock10,Dock10,Dock10,Dock10,Dock10,Dock10,Dock10,Dock10,Dock10	Intron,Intron,Intron,Intron,Intron,Intron,Intron,Intron,Intron,Intron,Intron,Intron,Intron
chr1	80614699	80615199	13.6873	6.60422	58.43	63.3784	14.9863	10.7755	40.5023	58.7376	2.55852	4.21762e-05	1.94922	0.000869521	Dock10,Dock10,Dock10,Dock10,Dock10,Dock10,Dock10,Dock10,Dock10,Dock10,Dock10,Dock10,Dock10	Intron,Intron,Intron,Intron,Intron,Intron,Intron,Intron,Intron,Intron,Intron,Intron,Intron
chr1	80615488	80615769	10.0854	2.83038	29.5587	30.401	5.61985	9.94664	26.6839	24.1861	2.17699	0.0156539	1.69917	0.0305917	Dock10,Dock10,Dock10,Dock10,Dock10,Dock10,Dock10,Dock10,Dock10,Dock10,Dock10,Dock10,Dock10	Intron,Intron,Intron,Intron,Intron,Intron,Intron,Intron,Intron,Intron,Intron,Intron,Intron
chr1	80619150	80619353	14.4077	17.9257	3.43706	1.54581	35.5924	21.551	4.28848	8.06202	-2.72611	0.0249816	-2.22075	0.00382859	Dock10,Dock10,Dock10,Dock10,Dock10,Dock10,Dock10,Dock10,Dock10,Dock10,Dock10,Dock10,Dock10	Intron,Intron,Intron,Intron,Intron,Intron,Intron,Intron,Intron,Intron,Intron,Intron,Intron
chr1	80636268	80636813	10.0854	10.3781	57.7426	51.0119	11.2397	12.4333	32.8784	44.917	2.40997	0.00013265	1.71233	0.00688115	Dock10,Dock10,Dock10,Dock10,Dock10,Dock10,Dock10,Dock10,Dock10,Dock10,Dock10,Dock10,Dock10	Intron,Intron,Intron,Intron,Intron,Intron,Intron,Intron,Intron,Intron,Intron,Intron,Intron
chr1	80636893	80638163	85.0054	72.6465	120.297	117.997	266.006	242.035	123.413	106.534	0.59254	0.104042	-1.14065	1.58491e-07	Dock10,Dock10,Dock10,Dock10,Dock10,Dock10,Dock10,Dock10,Dock10,Dock10,Dock10,Dock10,Dock10	Intron,Intron,Intron,Intron,Intron,Intron,Intron,Intron,Intron,Intron,Intron,Intron,Intron
chr1	80638995	80639408	13.6873	10.3781	57.0551	66.9853	10.3031	20.7222	69.0922	40.886	2.35652	6.50592e-05	1.81809	0.00180168	Dock10,Dock10,Dock10,Dock10,Dock10,Dock10,Dock10,Dock10,Dock10,Dock10,Dock10,Dock10,Dock10	Intron,Intron,Intron,Intron,Intron,Intron,Intron,Intron,Intron,Intron,Intron,Intron,Intron
chr1	80639664	80640045	30.9765	48.1165	19.2475	21.1261	39.3389	58.8509	21.4424	11.5172	-0.962339	0.14737	-1.56771	0.00601699	Dock10,Dock10,Dock10,Dock10,Dock10,Dock10,Dock10,Dock10,Dock10,Dock10,Dock10,Dock10,Dock10	Intron,Intron,Intron,Intron,Intron,Intron,Intron,Intron,Intron,Intron,Intron,Intron,Intron
chr1	80643811	80644549	43.2231	50.0034	32.3083	41.2217	80.5512	109.413	25.7309	35.7032	-0.336193	0.562111	-1.6361	4.84013e-05	Dock10,Dock10,Dock10,Dock10,Dock10,Dock10,Dock10,Dock10,Dock10,Dock10,Dock10,Dock10,Dock10	Intron,Intron,Intron,Intron,Intron,Intron,Intron,Intron,Intron,Intron,Intron,Intron,Intron
chr1	80655259	80655647	24.4931	44.3426	17.8727	23.7025	55.2618	49.7332	15.7244	23.0343	-0.714663	0.320125	-1.44344	0.0051523	Dock10,Dock10,Dock10,Dock10,Dock10,Dock10,Dock10,Dock10,Dock10,Dock10,Dock10,Dock10,Dock10	Intron,Intron,Intron,Intron,Intron,Intron,Intron,Intron,Intron,Intron,Intron,Intron,Intron
chr1	80659506	80660733	22.3319	25.4734	125.109	137.578	29.0359	37.2999	119.601	84.6512	2.46421	8.36166e-10	1.62086	5.37599e-05	Dock10,Dock10,Dock10,Dock10,Dock10,Dock10,Dock10,Dock10,Dock10,Dock10,Dock10,Dock10,Dock10	Intron,Intron,Intron,Intron,Intron,Intron,Intron,Intron,Intron,Intron,Intron,Intron,Intron
chr1	80670222	80670835	78.5219	86.7984	56.3677	35.5537	152.673	205.564	67.1862	39.7342	-0.853344	0.0666467	-1.73845	5.71261e-08	Dock10,Dock10,Dock10,Dock10,Dock10,Dock10,Dock10,Dock10,Dock10,Dock10,Dock10,Dock10	Intron,Intron,Intron,Intron,Intron,Intron,Intron,Intron,Intron,Intron,Intron,Intron
chr1	80671014	80671402	18.73	34.908	14.4356	18.5498	45.8954	85.3753	25.2544	24.7619	-0.688492	0.394066	-1.39577	0.00442417	Dock10,Dock10,Dock10,Dock10,Dock10,Dock10,Dock10,Dock10,Dock10,Dock10,Dock10,Dock10	Intron,Intron,Intron,Intron,Intron,Intron,Intron,Intron,Intron,Intron,Intron,Intron
chr1	80676395	80676538	2.88154	0.94346	8.93635	8.24435	0.936641	1.65777	12.8654	20.1551	2.1293	0.195292	3.6501	0.00494608	Dock10,Dock10,Dock10,Dock10,Dock10,Dock10,Dock10,Dock10,Dock10,Dock10,Dock10,Dock10	Intron,Intron,Intron,Intron,Intron,Intron,Intron,Intron,Intron,Intron,Intron,Intron
chr1	80699809	80700103	11.5262	3.77384	5.49929	3.09163	44.9588	30.6688	13.8184	12.6689	-0.857604	0.578687	-1.50911	0.0134228	Dock10,Dock10,Dock10,Dock10,Dock10,Dock10,Dock10,Dock10,Dock10,Dock10,Dock10,Dock10	Intron,Intron,Intron,Intron,Intron,Intron,Intron,Intron,Intron,Intron,Intron,Intron
chr1	80700264	80700524	12.2465	15.0954	14.4356	2.57636	29.9725	32.3266	14.2949	9.21374	-0.703521	0.567241	-1.39905	0.0357223	Dock10,Dock10,Dock10,Dock10,Dock10,Dock10,Dock10,Dock10,Dock10,Dock10,Dock10,Dock10	Intron,Intron,Intron,Intron,Intron,Intron,Intron,Intron,Intron,Intron,Intron,Intron
chr1	80703244	80703654	18.73	34.908	9.62376	17.5192	75.868	83.7175	26.6839	10.9413	-0.964237	0.253529	-2.07023	2.27371e-05	Dock10,Dock10,Dock10,Dock10,Dock10,Dock10,Dock10,Dock10,Dock10,Dock10,Dock10,Dock10	Intron,Intron,Intron,Intron,Intron,Intron,Intron,Intron,Intron,Intron,Intron,Intron
chr1	80709451	80709652	1.44077	0.94346	15.1231	25.2483	3.74657	4.97332	9.52996	7.48616	4.05938	0.0028174	0.962493	0.438156	Dock10,Dock10,Dock10,Dock10,Dock10,Dock10,Dock10,Dock10,Dock10,Dock10,Dock10,Dock10	Intron,Intron,Intron,Intron,Intron,Intron,Intron,Intron,Intron,Intron,Intron,Exon
chr1	80713683	80714235	10.8058	5.66076	66.6789	87.5962	21.5428	13.2622	63.8507	76.0133	3.19967	7.65723e-08	2.01438	4.67265e-05	Dock10,Dock10,Dock10,Dock10,Dock10,Dock10,Dock10,Dock10,Dock10,Dock10,Dock10,Dock10	Intron,Intron,Intron,Intron,Intron,Intron,Intron,Intron,Intron,Intron,Intron,Promoter
chr1	80715588	80716518	17.2892	23.5865	164.979	150.975	21.5428	6.63109	120.554	100.775	2.96399	4.08758e-14	2.99796	4.36896e-10	Dock10,Dock10,Dock10,Dock10,Dock10,Dock10,Dock10,Dock10,Dock10,Dock10,Dock10	Intron,Intron,Intron,Intron,Intron,Intron,Intron,Intron,Intron,Intron,Intron
chr1	80717383	80717845	26.6542	22.6431	52.9307	54.1035	7.49313	23.2088	49.0793	32.8239	1.11455	0.04917	1.40437	0.0353935	Dock10,Dock10,Dock10,Dock10,Dock10,Dock10,Dock10,Dock10,Dock10,Dock10,Dock10	Intron,Intron,Intron,Intron,Intron,Intron,Intron,Intron,Intron,Intron,Intron
chr1	80722736	80722993	10.8058	14.1519	35.7454	38.6454	27.1626	31.4977	29.0664	39.7342	1.58464	0.0269614	0.225277	0.713541	Dock10,Dock10,Dock10,Dock10,Dock10,Dock10,Dock10,Dock10,Dock10,Dock10,Dock10	Intron,Intron,Intron,Intron,Intron,Intron,Intron,Intron,Intron,Intron,Intron
chr1	80723251	80723750	11.5262	19.8127	50.181	75.2296	11.2397	20.7222	52.4148	75.4375	2.02113	0.000696483	1.98743	0.00019759	Dock10,Dock10,Dock10,Dock10,Dock10,Dock10,Dock10,Dock10,Dock10,Dock10,Dock10	Intron,Intron,Intron,Intron,Intron,Intron,Intron,Intron,Intron,Intron,Intron
chr1	80725042	80725363	15.8485	16.0388	20.6223	15.4581	47.7687	35.6421	15.7244	15.5482	0.174383	0.852906	-1.41282	0.013447	Dock10,Dock10,Dock10,Dock10,Dock10,Dock10,Dock10,Dock10,Dock10,Dock10,Dock10	Intron,Intron,Intron,Intron,Intron,Intron,Intron,Intron,Intron,Intron,Intron
chr1	80728056	80728567	28.095	30.1907	22.6846	35.5537	102.094	72.942	30.9724	39.7342	0.00628457	0.993518	-1.3091	0.00132154	Dock10,Dock10,Dock10,Dock10,Dock10,Dock10,Dock10,Dock10,Dock10,Dock10,Dock10	Intron,Intron,Intron,Intron,Intron,Intron,Intron,Intron,Intron,Intron,Intron
chr1	80730528	80731136	87.1665	96.233	43.3069	42.2523	193.885	285.966	47.6498	51.2514	-1.09916	0.00911199	-2.28212	5.17619e-17	Dock10,Dock10,Dock10,Dock10,Dock10,Dock10,Dock10,Dock10,Dock10,Dock10,Dock10	Intron,Intron,Intron,Intron,Intron,Intron,Intron,Intron,Intron,Intron,Intron
chr1	80745882	80746631	294.637	270.773	78.3649	110.268	473.004	417.759	121.03	117.475	-1.57764	3.22088e-09	-1.89948	1.2396e-28	Dock10,Dock10,Dock10,Dock10,Dock10,Dock10,Dock10,Dock10,Dock10,Dock10,Dock10	Intron,Intron,Intron,Intron,Intron,Intron,Intron,Intron,Intron,Intron,Intron
chr1	80746734	80747436	129.669	117.933	86.6138	64.9242	199.505	207.222	91.0111	73.134	-0.714409	0.0525446	-1.30592	2.05571e-07	Dock10,Dock10,Dock10,Dock10,Dock10,Dock10,Dock10,Dock10,Dock10,Dock10,Dock10	Intron,Intron,Intron,Intron,Intron,Intron,Intron,Intron,Intron,Intron,Intron
chr1	80749367	80749684	34.5785	46.2296	21.3098	20.6109	59.945	42.2732	19.5364	25.3378	-0.943385	0.143322	-1.18898	0.0219392	Dock10,Dock10,Dock10,Dock10,Dock10,Dock10,Dock10,Dock10,Dock10,Dock10,Dock10	Intron,Intron,Intron,Intron,Intron,Intron,Intron,Intron,Intron,Intron,Intron
chr1	80785126	80785698	7.92423	11.3215	109.986	99.4474	9.36641	10.7755	82.4341	59.3134	3.46241	1.66195e-11	2.81374	1.91349e-07	Intergenic	Intergenic
chr1	80855033	80855698	109.498	76.4203	37.1202	71.1075	120.827	140.911	52.8913	74.8616	-0.775726	0.106306	-1.04044	0.00142177	Intergenic	Intergenic
chr1	81058911	81059130	5.04269	4.7173	19.2475	11.8512	3.74657	3.31555	18.5834	23.6102	1.6649	0.146439	2.58006	0.0069187	Intergenic	Intergenic
chr1	81300807	81301053	22.3319	16.9823	4.81188	1.54581	31.8458	29.8399	1.42949	3.45515	-2.67039	0.0165918	-3.69055	1.28707e-05	Intergenic	Intergenic
chr1	82282716	82283970	123.186	129.254	279.776	332.35	262.26	255.297	317.824	301.174	1.28059	1.24525e-07	0.259103	0.157275	Irs1	Intron
chr1	82290062	82290507	25.9338	20.7561	8.24894	19.065	29.0359	36.471	12.3889	10.9413	-0.762881	0.388217	-1.48897	0.0210969	Irs1,Irs1	Exon,Promoter
chr1	82292906	82293111	8.64462	14.1519	8.24894	6.69853	24.3527	21.551	2.38249	6.33444	-0.605035	0.615053	-2.41886	0.00534314	Intergenic	Intergenic
chr1	82316035	82317188	237.727	285.869	593.236	751.266	488.927	465.834	792.893	782.592	1.36534	9.6395e-13	0.723375	8.69321e-11	Intergenic,Rhbdd1,Rhbdd1,Rhbdd1	Intergenic,Promoter,Promoter,Promoter
chr1	82358974	82359310	7.20385	6.60422	33.6832	34.0079	0.936641	5.80221	15.2479	15.5482	2.29014	0.00426928	2.16338	0.0512318	LOC108167630	Exon
chr1	82372606	82372794	12.2465	21.6996	2.74965	4.12217	23.416	19.0644	12.8654	5.75859	-2.28467	0.0460608	-1.17618	0.151823	LOC108167630	Exon
chr1	82476361	82476605	0.720385	8.49114	26.809	29.8858	0	5.80221	10.483	12.093	2.6874	0.00945959	1.92455	0.145869	Col4a4,Col4a4,Col4a4	Intron,Intron,Intron
chr1	82476792	82477144	5.04269	2.83038	47.4314	35.5537	6.55649	8.28886	19.0599	10.3655	3.36589	5.12183e-05	0.988821	0.309875	Col4a4,Col4a4,Col4a4	Intron,Intron,Intron
chr1	82724330	82725726	190.182	176.427	573.301	720.865	344.684	342.33	684.251	636.324	1.8194	3.82844e-21	0.943503	8.18171e-14	LOC105243964,Mff,Mff,Mff,Mff,Mff,LOC105243964	Intron,Promoter,Promoter,Promoter,Promoter,Promoter,Exon
chr1	82761397	82762089	12.9669	8.49114	111.361	129.333	15.9229	7.45998	135.325	120.93	3.46654	7.15258e-13	3.47445	9.64139e-15	Tm4sf20	Intron
chr1	82791735	82792555	85.0054	64.1553	54.3055	34.0079	141.433	150.857	39.0728	36.855	-0.767234	0.121365	-1.94394	3.74372e-10	Intergenic	Intergenic
chr1	82792799	82793734	48.2658	37.7384	202.099	163.856	40.2756	35.6421	173.922	187.73	2.07947	7.55688e-10	2.25409	8.92091e-14	Intergenic	Intergenic
chr1	82797180	82797375	1.44077	8.49114	14.4356	15.4581	2.80992	5.80221	11.436	24.1861	1.63053	0.189914	2.0301	0.0452971	Intergenic	Intergenic
chr1	82798332	82799269	16.5688	26.4169	136.795	113.36	19.6695	19.0644	124.842	101.927	2.55748	3.0586e-09	2.55151	3.77302e-10	Intergenic	Intergenic
chr1	82819118	82820007	64.1142	77.3638	28.1839	23.7025	168.595	193.131	30.9724	50.0997	-1.44888	0.00369178	-2.16763	2.65597e-12	Intergenic	Intergenic
chr1	82833596	82833909	10.8058	8.49114	35.058	24.733	2.80992	12.4333	16.6774	32.2481	1.62078	0.0469365	1.65968	0.0615787	Intergenic	Intergenic
chr1	82836345	82837102	32.4173	53.7772	54.9929	55.6493	35.5924	19.0644	69.0922	53.5549	0.369515	0.503897	1.17583	0.0200006	Intergenic	Intergenic
chr1	82839036	82840492	247.092	179.257	528.619	511.149	326.888	289.281	521.765	542.459	1.27984	5.82122e-10	0.789698	2.39111e-08	LOC108167631,LOC108167631,Agfg1,Agfg1,Agfg1,Agfg1,LOC108167631,Intergenic	Intron,Promoter,Promoter,Promoter,Promoter,Promoter,Exon,Intergenic
chr1	82846256	82846480	23.0523	8.49114	8.93635	6.18326	21.5428	23.2088	5.71798	2.30343	-1.0799	0.329003	-2.45871	0.00504025	Agfg1,Agfg1,Agfg1	Promoter,Promoter,Promoter
chr1	82846644	82846901	49.7065	29.2473	13.7482	14.4276	34.6557	38.1288	10.0065	11.5172	-1.49175	0.0324179	-1.76135	0.00465672	Agfg1,Agfg1,Agfg1	Promoter,Promoter,Promoter
chr1	82849885	82850035	7.92423	16.9823	8.93635	2.06109	14.0496	27.3533	6.19447	6.9103	-1.19528	0.360896	-1.66662	0.0496564	Agfg1,Agfg1,Agfg1	Promoter,Promoter,Promoter
chr1	82869240	82870082	87.1665	69.8161	19.9349	22.1567	174.215	159.146	45.7438	32.8239	-1.89864	9.74969e-05	-2.07776	1.02628e-11	Agfg1,Agfg1,Agfg1	Promoter,Promoter,Promoter
chr1	82870246	82870556	27.3746	24.53	1.37482	1.03054	65.5649	64.6531	2.38249	3.45515	-4.45204	0.000121044	-4.49655	4.03489e-12	Agfg1,Agfg1,Agfg1	Promoter,Promoter,Promoter
chr1	82871855	82872058	15.1281	13.2084	4.12447	4.63744	16.8595	33.1555	2.85899	5.75859	-1.69188	0.146658	-2.55853	0.00279165	Intergenic	Intergenic
chr1	82878525	82878669	8.64462	3.77384	2.74965	1.03054	13.113	11.6044	0.476498	1.72758	-1.75118	0.339049	-3.53062	0.00730635	Intergenic	Intergenic
chr1	82878963	82879706	73.4792	64.1553	62.5544	49.4661	226.667	240.377	45.2673	48.948	-0.30283	0.526466	-2.31183	2.46987e-20	Intergenic	Intergenic
chr1	82894473	82894730	6.48346	4.7173	5.49929	3.09163	35.5924	21.551	1.90599	3.45515	-0.397895	0.815063	-3.43145	6.62989e-05	Intergenic	Intergenic
chr1	82900630	82900949	15.1281	25.4734	6.87411	3.6069	48.7054	34.8132	11.436	2.30343	-1.96594	0.0553507	-2.57349	0.000380997	Intergenic	Intergenic
chr1	82975752	82976176	39.6212	49.0599	22.6846	16.4887	73.058	92.0064	41.4553	34.5515	-1.18273	0.0607389	-1.11793	0.00553227	Intergenic	Intergenic
chr1	84147842	84148178	8.64462	8.49114	29.5587	23.1872	1.87328	4.97332	12.3889	24.7619	1.61898	0.0599801	2.4162	0.0203671	Pid1,Pid1,Pid1,Pid1,Pid1,Pid1	Intron,Intron,Intron,Intron,Intron,Intron
chr1	84198974	84199211	3.60192	4.7173	35.058	28.8552	4.68321	4.97332	25.7309	28.7929	2.95289	0.00096394	2.49511	0.0024873	Pid1,Pid1,Pid1,Pid1,Pid1	Intron,Intron,Intron,Intron,Intron
chr1	84199983	84200235	2.88154	0	22.6846	19.065	0	2.48666	21.4424	19.5792	3.74541	0.00411854	3.98237	0.00145014	Pid1,Pid1,Pid1,Pid1,Pid1	Intron,Intron,Intron,Intron,Intron
chr1	84203613	84203857	3.60192	8.49114	29.5587	27.8247	5.61985	2.48666	20.9659	25.3378	2.27662	0.0113949	2.53057	0.0057641	Pid1,Pid1,Pid1,Pid1,Pid1	Intron,Intron,Intron,Intron,Intron
chr1	84218642	84218915	9.365	7.54768	24.7468	29.3705	1.87328	5.80221	26.6839	24.1861	1.67295	0.0500412	2.70501	0.00271605	Pid1,Pid1,Pid1,Pid1,Pid1,Mir6353,Mir6353	Intron,Intron,Intron,Intron,Intron,Promoter,Exon
chr1	84237443	84237805	2.16115	3.77384	25.4342	35.5537	9.36641	9.11775	31.4489	27.6412	3.3936	0.000536721	1.67813	0.0189262	Pid1,Pid1,Pid1,Pid1,Pid1	Intron,Intron,Intron,Intron,Intron
chr1	84237971	84238407	1.44077	1.88692	50.181	58.2257	5.61985	3.31555	39.5493	35.7032	5.0475	1.81571e-07	3.08857	5.62251e-05	Pid1,Pid1,Pid1,Pid1,Pid1	Intron,Intron,Intron,Intron,Intron
chr1	84240140	84240711	12.9669	15.0954	102.424	48.4355	20.6061	20.7222	60.5152	51.2514	2.42661	3.96059e-05	1.43649	0.00453539	Pid1,Pid1,Pid1,Pid1,Pid1	Intron,Intron,Intron,Intron,Intron
chr1	84241411	84241752	8.64462	5.66076	34.3706	45.3439	11.2397	4.97332	31.4489	22.4585	2.46398	0.00121045	1.74927	0.0263661	Pid1,Pid1,Pid1,Pid1,Pid1	Intron,Intron,Intron,Intron,Intron
chr1	84241883	84242028	5.76308	5.66076	10.3112	17.004	0	1.65777	18.5834	12.093	1.26254	0.281841	4.14794	0.00573718	Pid1,Pid1,Pid1,Pid1,Pid1	Intron,Intron,Intron,Intron,Intron
chr1	84245507	84245636	0	0	8.93635	13.9123	2.80992	0	8.57696	8.63788	6.23837	0.00342166	2.66409	0.089868	Pid1,Pid1,Pid1,Pid1,Pid1	Intron,Intron,Intron,Intron,Intron
chr1	84250841	84251147	2.88154	3.77384	41.2447	41.737	3.74657	5.80221	29.0664	35.7032	3.65609	1.85676e-05	2.75006	0.000492866	Pid1,Pid1,Pid1,Pid1,Pid1	Intron,Intron,Intron,Intron,Intron
chr1	84251259	84251511	7.20385	5.66076	30.9335	29.3705	0.936641	4.97332	16.6774	15.5482	2.21919	0.0089613	2.41781	0.0290196	Pid1,Pid1,Pid1,Pid1,Pid1	Intron,Intron,Intron,Intron,Intron
chr1	84302738	84303158	12.9669	3.77384	81.1145	72.138	4.68321	8.28886	52.8913	62.1927	3.14419	3.21588e-07	3.13366	5.40396e-07	Pid1,Pid1	Intron,Intron
chr1	84305798	84306037	8.64462	4.7173	2.74965	4.63744	37.4657	24.0377	3.33549	12.6689	-0.853665	0.596659	-1.96069	0.012663	Pid1,Pid1	Intron,Intron
chr1	84317654	84318143	5.04269	10.3781	103.112	101.508	4.68321	10.7755	114.36	88.1064	3.77062	8.23918e-12	3.6903	2.62087e-12	Pid1,Pid1	Intron,Intron
chr1	84318301	84318437	1.44077	0	15.8105	10.3054	9.36641	3.31555	10.0065	14.3965	4.05563	0.0197711	0.954701	0.378956	Pid1,Pid1	Intron,Intron
chr1	84321164	84321666	6.48346	8.49114	38.495	45.8592	8.42977	3.31555	38.5963	33.3998	2.50673	0.000629252	2.63691	0.000434901	Pid1,Pid1	Intron,Intron
chr1	84349964	84350864	14.4077	12.265	281.151	279.792	11.2397	14.92	222.048	182.547	4.38373	2.26137e-33	3.94357	2.92831e-25	Intergenic	Intergenic
chr1	84359965	84360454	17.2892	25.4734	75.6153	121.604	14.0496	30.6688	70.9982	88.6822	2.22166	5.47822e-06	1.82327	0.000153503	Intergenic	Intergenic
chr1	84362456	84363572	25.2135	26.4169	114.11	103.57	22.4794	13.2622	122.46	120.93	2.07667	9.3085e-07	2.77958	1.26016e-11	Intergenic	Intergenic
chr1	84363654	84363991	4.32231	1.88692	26.809	30.9163	13.113	5.80221	20.4894	36.855	3.1786	0.00122134	1.60858	0.0381064	Intergenic	Intergenic
chr1	84406774	84407500	33.8581	28.3038	193.85	204.048	53.3886	46.4176	180.116	172.182	2.67121	1.48514e-15	1.82243	3.24878e-10	Dner	Intron
chr1	84421915	84422112	10.0854	3.77384	16.4979	12.8818	0.936641	4.97332	11.436	19.5792	1.05936	0.353839	2.35968	0.0382898	Dner	Intron
chr1	84426598	84427293	15.8485	7.54768	98.2998	113.875	14.9863	8.28886	79.0987	97.3201	3.14879	4.85651e-10	2.93484	3.54844e-09	Dner	Intron
chr1	84437664	84437855	6.48346	0.94346	21.9972	15.9734	2.80992	0	21.9189	27.6412	2.29959	0.0509059	4.20631	0.00042006	Dner	Intron
chr1	84444252	84444513	5.04269	3.77384	24.0594	24.733	4.68321	5.80221	10.9595	20.1551	2.45672	0.0117219	1.56081	0.119101	Dner	Intron
chr1	84464861	84465231	9.365	14.1519	45.3692	63.8937	4.68321	4.97332	41.4553	38.5825	2.23388	0.000448178	3.04999	3.21404e-05	Dner	Intron
chr1	84467708	84468171	7.20385	2.83038	94.8628	68.5311	7.49313	9.94664	59.0857	66.7996	3.97175	1.05539e-09	2.84394	5.21252e-07	Dner	Intron
chr1	84561848	84562398	13.6873	7.54768	83.1768	86.0504	3.74657	6.63109	59.0857	55.2824	2.96814	5.0701e-08	3.4468	1.51502e-07	Dner	Intron
chr1	84581902	84582105	9.365	5.66076	17.1853	20.6109	1.87328	0.828886	17.1539	25.3378	1.31916	0.187941	3.9977	0.00106434	Dner	Intron
chr1	84589405	84589644	3.60192	3.77384	22.6846	18.5498	1.87328	3.31555	10.9595	9.21374	2.48307	0.0201537	1.94893	0.12522	Dner	Intron
chr1	84742220	84742523	20.1708	26.4169	7.56153	4.63744	72.1214	48.0754	3.33549	7.48616	-1.94413	0.0377114	-3.49733	9.55649e-09	Trip12,Trip12,Trip12,Trip12,Trip12,Trip12,Trip12,Trip12,Trip12,Trip12,Trip12,Trip12,Trip12,Trip12,Trip12,Trip12,Trip12,Trip12,Trip12,Trip12,Trip12,Trip12,Trip12,Trip12,Trip12,Trip12,Trip12,Trip12	Exon,Exon,Exon,Exon,Exon,Exon,Exon,Exon,Exon,Exon,Exon,Exon,Exon,Exon,Intron,Intron,Intron,Intron,Intron,Intron,Intron,Intron,Intron,Intron,Intron,Intron,Intron,Intron
chr1	84742769	84742860	10.0854	9.4346	2.06223	0	14.0496	13.2622	0.476498	4.03101	-3.33835	0.0603533	-2.64113	0.0266289	Trip12,Trip12,Trip12,Trip12,Trip12,Trip12,Trip12,Trip12,Trip12,Trip12,Trip12,Trip12,Trip12,Trip12	Intron,Intron,Intron,Intron,Intron,Intron,Intron,Intron,Intron,Intron,Intron,Intron,Intron,Intron
chr1	84791429	84791807	30.9765	28.3038	7.56153	12.8818	69.3115	61.3376	9.52996	6.33444	-1.52432	0.0573437	-3.02864	1.08059e-08	Trip12,Trip12,Trip12,Trip12,Trip12,Trip12,Trip12,Trip12,Trip12,Trip12,Trip12,Trip12,Trip12	Intron,Intron,Intron,Intron,Intron,Intron,Intron,Intron,Intron,Intron,Intron,Intron,Intron
chr1	84820902	84821063	2.16115	3.77384	1.37482	10.8207	11.2397	23.2088	3.33549	3.45515	1.06715	0.56622	-2.34867	0.0172225	Trip12,Trip12,Trip12,Trip12,Trip12,Trip12,Trip12,Trip12,Trip12,Trip12,Trip12,Trip12,Trip12	Intron,Intron,Intron,Intron,Intron,Intron,Intron,Intron,Intron,Intron,Intron,Intron,Intron
chr1	84823539	84823981	21.6115	37.7384	7.56153	0.515272	43.0855	41.4443	5.71798	1.72758	-2.93232	0.00530651	-3.46825	1.3306e-06	Trip12,Trip12,Trip12,Trip12,Trip12,Trip12,Trip12,Trip12,Trip12,Trip12,Trip12,Trip12,Trip12	Intron,Intron,Intron,Intron,Intron,Intron,Intron,Intron,Intron,Intron,Intron,Intron,Intron
chr1	84838158	84840579	303.282	316.059	982.311	916.668	520.773	521.37	872.944	838.45	1.61688	8.30015e-27	0.715989	2.17145e-11	Trip12,Trip12,Trip12,Trip12,Trip12,Trip12,Trip12,Trip12,Trip12,Trip12,Trip12,Trip12,Trip12,Trip12,Trip12,Trip12,Trip12,Trip12,Trip12,Trip12,Trip12,Fbxo36,Trip12,Trip12,Trip12,Trip12,Trip12,Trip12,Trip12,Trip12,Trip12,Trip12,Trip12	Intron,Intron,Intron,Intron,Intron,Intron,Intron,Intron,Intron,Intron,Intron,Intron,Promoter,Promoter,Promoter,Promoter,Promoter,Promoter,Promoter,Exon,Exon,Promoter,Exon,Exon,Exon,Exon,Exon,Promoter,Promoter,Promoter,Exon,Exon,Exon
chr1	84874357	84874496	11.5262	7.54768	2.74965	0.515272	22.4794	15.7488	4.28848	4.60687	-2.60246	0.108081	-2.10252	0.0188804	Fbxo36	Promoter
chr1	84881353	84882370	79.9627	95.2895	125.109	182.406	41.2122	55.5354	118.648	96.7443	0.818041	0.0204165	1.15214	0.00164989	Fbxo36	Promoter
chr1	84924109	84924471	11.5262	12.265	62.5544	83.9893	7.49313	4.97332	66.7097	81.7719	2.62796	2.68411e-06	3.58473	1.30558e-09	Slc16a14,Slc16a14	Intron,Intron
chr1	84935202	84935312	10.0854	2.83038	9.62376	12.8818	2.80992	0.828886	10.483	12.6689	0.780346	0.546438	2.69557	0.0421356	Slc16a14,Gm39669,Slc16a14,Slc16a14	Promoter,Promoter,Promoter,Exon
chr1	84935758	84936095	9.365	13.2084	46.744	58.741	2.80992	2.48666	64.8037	62.7686	2.23917	0.000458588	4.59458	3.42228e-09	Slc16a14,Gm39669,Slc16a14,Intergenic	Promoter,Promoter,Promoter,Intergenic
chr1	85277706	85277975	44.6638	66.9857	18.5601	20.6109	23.416	33.9843	39.5493	36.855	-1.50371	0.00942549	0.408966	0.478742	Gm38510	Intron
chr1	85679811	85680723	20.1708	31.1342	27.4965	21.1261	127.383	131.793	15.7244	11.5172	-0.0739398	0.927112	-3.2403	3.38157e-17	Sp100,Sp100,Sp100	Promoter,Promoter,Promoter
chr1	85686748	85687716	56.19	61.3249	85.239	52.0424	130.193	167.435	46.2203	54.7066	0.220023	0.665707	-1.56476	4.39855e-07	Intergenic	Intergenic
chr1	85697460	85698806	140.475	118.876	52.9307	63.8937	274.436	246.179	66.2332	64.4962	-1.1489	0.00149273	-1.99229	3.70026e-18	Intergenic	Intergenic
chr1	85699168	85699350	20.8912	8.49114	6.87411	8.24435	25.2893	14.0911	0.476498	5.18273	-0.966543	0.387841	-2.83915	0.00764381	Intergenic	Intergenic
chr1	85702624	85702951	20.8912	10.3781	10.9986	13.9123	44.0221	28.1821	11.9124	10.3655	-0.334947	0.746484	-1.69052	0.00811594	Intergenic	Intergenic
chr1	85703162	85704223	136.153	98.1199	730.031	793.518	373.72	299.228	621.353	667.42	2.69098	1.5286e-42	0.939651	1.87094e-11	Intergenic	Intergenic
chr1	85705972	85706549	41.0619	33.9646	10.9986	22.6719	86.171	92.0064	18.5834	17.2758	-1.14469	0.109653	-2.31159	2.71338e-08	Intergenic	Intergenic
chr1	85730636	85730760	13.6873	17.9257	7.56153	3.09163	13.113	14.0911	2.85899	3.45515	-1.58711	0.159788	-2.11242	0.0447885	A630001G21Rik,A630001G21Rik	Intron,Intron
chr1	85732469	85732984	32.4173	27.3604	24.0594	51.0119	85.2344	81.2309	35.7373	42.6135	0.333842	0.633862	-1.08946	0.00558954	A630001G21Rik,A630001G21Rik	Intron,Intron
chr1	85734514	85736817	247.092	202.844	498.373	507.027	496.42	478.268	402.164	403.101	1.15608	2.67534e-09	-0.275109	0.0502735	A630001G21Rik,A630001G21Rik,A630001G21Rik,A630001G21Rik,A630001G21Rik,A630001G21Rik,A630001G21Rik,A630001G21Rik,Intergenic	Intron,Intron,Promoter,Promoter,Exon,Intron,Exon,Exon,Intergenic
chr1	85739777	85740291	83.5646	80.1941	19.9349	32.9774	140.496	183.184	45.7438	39.7342	-1.61873	0.000851309	-1.91996	3.47546e-10	Intergenic	Intergenic
chr1	85747874	85748107	2.88154	0	22.6846	36.069	10.3031	2.48666	16.2009	17.8516	4.23124	0.000333134	1.43115	0.145462	Intergenic	Intergenic
chr1	85750013	85750244	5.76308	18.8692	6.1867	9.79016	25.2893	24.0377	8.10046	5.18273	-0.602189	0.625302	-1.88295	0.0151602	Intergenic	Intergenic
chr1	85750645	85752850	337.86	349.08	327.895	378.725	778.349	776.667	369.762	377.763	0.0428728	0.855184	-1.05707	8.31214e-21	Intergenic,Mir8096,Intergenic	Intergenic,Promoter,Intergenic
chr1	85756409	85756591	14.4077	13.2084	4.81188	8.75962	15.9229	24.0377	2.38249	0.575859	-1.01411	0.369907	-3.71201	0.000563864	Intergenic	Intergenic
chr1	85761829	85762049	15.8485	13.2084	2.74965	3.09163	19.6695	25.6955	4.28848	6.33444	-2.31262	0.0576628	-2.10545	0.0107105	Intergenic	Intergenic
chr1	85763295	85763672	12.2465	18.8692	10.3112	19.5803	49.642	43.931	13.3419	12.093	-0.0419261	0.96833	-1.87627	0.000704223	Intergenic	Intergenic
chr1	85799774	85800074	36.7396	33.0211	9.62376	13.9123	29.9725	42.2732	14.7714	23.0343	-1.55973	0.0329738	-0.943215	0.123602	Cab39	Promoter
chr1	85809336	85809485	1.44077	2.83038	14.4356	11.8512	1.87328	1.65777	14.2949	12.093	2.64903	0.0562725	2.90616	0.0217288	Cab39	Promoter
chr1	85837672	85838483	77.0812	98.1199	213.785	256.605	258.513	211.366	226.813	228.616	1.43237	4.96385e-07	-0.0431402	0.856751	Intergenic	Intergenic
chr1	85840375	85841002	30.9765	44.3426	44.6817	30.401	60.8817	57.1932	20.4894	32.2481	-0.00376461	0.995624	-1.16899	0.0160262	Intergenic	Intergenic
chr1	85894223	85896171	199.547	220.77	729.343	752.296	351.241	300.057	623.736	586.8	1.82057	5.28149e-27	0.896858	5.79977e-11	Intergenic,Itm2c,Itm2c	Intergenic,Promoter,Promoter
chr1	85932185	85932261	8.64462	12.265	4.81188	2.57636	11.2397	6.63109	0.952996	1.72758	-1.51179	0.265829	-2.75122	0.0483512	Intergenic	Intergenic
chr1	85933230	85933579	16.5688	25.4734	30.2461	30.401	68.3748	47.2465	17.6304	19.5792	0.537555	0.46361	-1.63491	0.00111458	Gpr55,Gpr55,Gpr55,Gpr55,Gpr55	Exon,Exon,Exon,Exon,Exon
chr1	85936692	85938095	262.94	245.3	17.1853	37.6148	590.084	614.205	45.7438	36.855	-3.18727	2.43416e-20	-3.85756	2.41463e-96	Gpr55,Gpr55,Gpr55,Gpr55,Gpr55	Intron,Intron,Intron,Intron,Intron
chr1	85950225	85950485	2.16115	2.83038	15.1231	36.5843	1.87328	3.31555	20.4894	19.5792	3.39307	0.00212852	2.93486	0.00453065	Gpr55,Gpr55,Gpr55,Gpr55,Gpr55,Gpr55	Intron,Intron,Intron,Intron,Intron,Intron
chr1	85956671	85956879	8.64462	6.60422	4.81188	1.03054	15.9229	24.8666	5.24148	1.15172	-1.41806	0.385236	-2.64361	0.00675249	Gpr55,Gpr55,Gpr55,Gpr55,Gpr55,Gpr55,Gm41905,Gpr55,Gpr55	Intron,Intron,Intron,Intron,Intron,Promoter,Promoter,Exon,Promoter
chr1	85957117	85959058	184.418	189.636	69.4285	78.3213	348.431	372.999	70.0452	59.8893	-1.3371	6.91825e-06	-2.46956	9.58612e-34	Gpr55,Gpr55,Gpr55,Gpr55,Gpr55,Gpr55,Gm41905,Gpr55,Gpr55	Intron,Intron,Intron,Intron,Intron,Promoter,Promoter,Promoter,Exon
chr1	85959549	85960070	25.9338	49.0599	18.5601	19.5803	55.2618	75.4287	15.7244	7.48616	-0.966337	0.167855	-2.47886	3.25816e-06	Gpr55,Gpr55,Gpr55,Gpr55,Gpr55,Gpr55,Gpr55	Intron,Intron,Intron,Intron,Exon,Promoter,Promoter
chr1	85962875	85963108	26.6542	28.3038	8.93635	11.336	39.3389	27.3533	11.9124	6.33444	-1.4322	0.0776948	-1.8553	0.00705831	Gpr55,Gpr55	Intron,Intron
chr1	85973368	85973944	46.825	29.2473	13.7482	13.9123	80.5512	88.6909	14.2949	17.8516	-1.46504	0.0372494	-2.40248	3.04858e-08	Gpr55,Gpr55	Intron,Intron
chr1	85977563	85978281	22.3319	54.7207	86.6138	123.15	51.5153	60.5087	98.1586	73.7099	1.46475	0.00313964	0.617991	0.116241	Gpr55,Gpr55	Intron,Intron
chr1	85985682	85986434	150.56	118.876	63.9293	41.737	141.433	167.435	39.5493	43.1894	-1.36123	0.000366823	-1.9033	4.11205e-10	Gpr55	Intron
chr1	85986725	85987034	7.92423	3.77384	39.1824	43.2828	10.3031	4.97332	49.0793	39.7342	2.78712	0.000343997	2.5565	0.000121647	Gpr55	Intron
chr1	85987281	85987591	8.64462	21.6996	63.2418	55.1341	2.80992	4.97332	45.2673	51.8273	1.98958	0.00149425	3.62369	8.74453e-07	Gpr55	Intron
chr1	85988350	85989074	12.9669	20.7561	123.047	134.486	18.7328	16.5777	92.9171	86.3788	2.95489	1.64415e-11	2.34725	1.06351e-07	Gpr55	Intron
chr1	85997996	85998963	143.357	171.71	64.6167	65.4395	383.086	378.801	76.2397	68.5272	-1.27399	9.53672e-05	-2.39306	4.67905e-35	Intergenic	Intergenic
chr1	86000955	86001156	18.73	12.265	4.12447	3.6069	29.0359	26.5244	3.81198	2.30343	-2.0125	0.0810506	-3.16641	0.000129982	Intergenic	Intergenic
chr1	86005121	86006893	221.158	189.636	36.4328	39.6759	395.263	474.123	77.1927	86.9547	-2.43106	7.92605e-15	-2.40899	4.26668e-37	Intergenic	Intergenic
chr1	86018229	86018878	47.5454	39.6253	38.495	47.405	130.193	71.2842	43.3613	31.0964	-0.021377	0.972357	-1.42842	0.000691767	Spata3,Spata3	Promoter,Promoter
chr1	86045804	86046650	60.5123	59.438	43.3069	64.9242	94.6008	96.9797	48.1263	31.6722	-0.143021	0.788304	-1.25766	0.00118421	Intergenic,2810459M11Rik	Intergenic,Promoter
chr1	86048194	86048764	36.7396	32.0777	21.3098	16.4887	74.9313	55.5354	40.0258	19.0033	-0.871437	0.208738	-1.13353	0.0251497	2810459M11Rik	Promoter
chr1	86063994	86065490	187.3	192.466	578.113	669.853	224.794	246.179	605.629	558.583	1.71818	1.03416e-20	1.30486	7.41011e-20	Intergenic,Psmd1	Intergenic,Promoter
chr1	86066717	86067051	5.76308	2.83038	25.4342	35.0385	4.68321	2.48666	15.2479	18.4275	2.78754	0.00246435	2.24365	0.0292098	Psmd1	Promoter
chr1	86144486	86144835	10.8058	9.4346	26.809	21.1261	4.68321	1.65777	23.8249	18.4275	1.23753	0.155581	2.76142	0.00558284	Intergenic	Intergenic
chr1	86153853	86155109	190.902	165.106	469.502	480.748	367.163	323.266	405.976	378.915	1.41313	1.01929e-12	0.187111	0.263254	Intergenic,Armc9,Armc9,Armc9,Armc9,Armc9,Armc9,Armc9	Intergenic,Promoter,Promoter,Promoter,Promoter,Promoter,Promoter,Promoter
chr1	86178880	86179356	57.6308	45.2861	100.362	134.486	57.1351	48.0754	99.5881	120.354	1.18739	0.0028256	1.06474	0.00252121	Armc9,Armc9	Promoter,Promoter
chr1	86190963	86191210	0.720385	3.77384	19.2475	33.4927	5.61985	3.31555	20.0129	25.3378	3.63373	0.00135392	2.35329	0.00885537	Armc9,Armc9	Promoter,Promoter
chr1	86202688	86202965	7.20385	5.66076	16.4979	38.6454	1.87328	3.31555	19.5364	20.7309	2.09856	0.0243032	2.94125	0.00438802	LOC108167633	Exon
chr1	86214187	86214613	27.3746	15.0954	81.802	93.7794	45.8954	60.5087	79.0987	98.4718	2.03018	4.3027e-05	0.733815	0.0601778	LOC108167633	Exon
chr1	86215324	86215542	2.16115	0.94346	22.6846	20.6109	5.61985	6.63109	10.9595	16.124	3.75466	0.00242815	1.13852	0.260346	LOC108167633	Exon
chr1	86228751	86230254	40.3415	68.8726	299.711	279.792	59.0084	67.1398	272.08	263.167	2.42436	3.70996e-16	2.08278	2.7493e-18	LOC108167633	Exon
chr1	86233833	86234261	10.0854	8.49114	55.6803	62.8631	14.0496	9.11775	42.4083	41.4618	2.66745	1.74099e-05	1.8642	0.00255553	LOC108167633	Exon
chr1	86260055	86260247	4.32231	3.77384	21.3098	17.004	4.68321	0	10.0065	6.9103	2.23514	0.0389402	1.89193	0.206985	LOC108167633	Promoter
chr1	86263243	86264247	17.2892	36.795	61.1796	110.268	40.2756	35.6421	72.4277	78.8926	1.68572	0.00201106	0.99609	0.0169053	LOC108167633	Promoter
chr1	86278143	86278415	3.60192	2.83038	28.8713	28.8552	4.68321	0.828886	21.9189	25.9136	3.15353	0.00109738	3.15367	0.0016959	Intergenic	Intergenic
chr1	86279845	86279958	6.48346	6.60422	5.49929	11.8512	4.68321	0	10.9595	16.6999	0.41673	0.764435	2.60406	0.0424292	Intergenic	Intergenic
chr1	86300764	86301125	6.48346	12.265	9.62376	16.4887	43.0855	30.6688	11.436	10.9413	0.497129	0.664252	-1.71725	0.00600127	Gm16341,Gm16341,Gm16341,Gm16341,Gm16341,Gm16341	Intron,Intron,Intron,Promoter,Promoter,Promoter
chr1	86301280	86301975	16.5688	30.1907	21.3098	30.401	88.0443	67.9687	25.7309	31.0964	0.159976	0.845355	-1.4583	0.000604107	Gm16341,Gm16341,Gm16341,Gm16341,Gm16341,Gm16341,Gm16341,Gm16341,Gm16341,Intergenic	Intron,Intron,Intron,Promoter,Promoter,Promoter,Exon,Exon,Exon,Intergenic
chr1	86343085	86343298	14.4077	8.49114	2.06223	2.06109	14.9863	24.0377	4.76498	2.30343	-2.47948	0.0785837	-2.45024	0.00909187	Intergenic	Intergenic
chr1	86344094	86344901	38.9008	39.6253	87.9887	82.4435	37.4657	38.9577	88.1521	65.072	1.11771	0.0116672	1.00537	0.0183128	Intergenic,Ncl	Intergenic,Exon
chr1	86358502	86360445	568.383	610.419	1404.38	1571.58	901.986	969.797	1196.01	1213.33	1.33786	3.04257e-24	0.363271	7.83872e-05	Ncl,Ncl,Ncl,Ncl,Ncl,C130036L24Rik,Ncl,Intergenic	Promoter,Intron,Intron,Promoter,Exon,Promoter,Exon,Intergenic
chr1	86372032	86372280	9.365	12.265	30.9335	52.0424	29.9725	16.5777	47.1733	30.5205	1.95303	0.00696363	0.749139	0.222342	Intergenic	Intergenic
chr1	86380953	86381407	26.6542	16.0388	75.6153	86.0504	54.3252	29.011	104.83	66.7996	1.9064	0.000162121	1.05159	0.0208741	Intergenic	Intergenic
chr1	86399423	86399650	1.44077	3.77384	26.809	32.4621	0.936641	3.31555	26.2074	25.9136	3.55952	0.000497529	3.58284	0.000414656	Intergenic	Intergenic
chr1	86415151	86416198	85.7258	83.968	99.6746	103.57	245.4	214.682	75.2867	74.8616	0.260396	0.500619	-1.6144	1.00107e-11	Intergenic	Intergenic
chr1	86416346	86416550	6.48346	11.3215	41.2447	32.9774	9.36641	4.14443	20.9659	29.3688	2.07679	0.00663003	1.90952	0.0209285	Intergenic	Intergenic
chr1	86416969	86417422	12.2465	9.4346	50.8684	50.4966	4.68321	4.97332	36.6903	47.2204	2.21522	0.000580223	3.11605	1.90798e-05	Intergenic	Intergenic
chr1	86429990	86430474	13.6873	27.3604	157.417	179.315	43.0855	47.2465	125.795	105.382	3.0668	3.68226e-14	1.35561	0.000108118	Intergenic,Gm32700,Gm32700	Intergenic,Exon,Intron
chr1	86433843	86435762	231.964	281.151	611.796	619.356	317.521	379.63	506.994	490.056	1.26671	2.11139e-12	0.51441	0.000541912	Gm32700	Intron
chr1	86437493	86438231	11.5262	18.8692	46.744	59.2562	8.42977	7.45998	54.7973	53.5549	1.8196	0.00348245	2.77271	4.09904e-06	Gm32700	Intron
chr1	86465852	86466439	9.365	7.54768	80.4271	90.6878	10.3031	9.11775	58.1327	101.927	3.32845	2.38485e-09	3.04293	2.89651e-08	Gm32758,Gm41907,Gm41907,Gm41907,Gm41907,Gm41907,Gm41907,Gm41907,Gm41907,Gm41907	Promoter,Exon,Exon,Intron,Intron,Exon,Exon,Promoter,Intron,Intron
chr1	86470355	86471677	34.5785	45.2861	503.185	563.192	17.7962	19.8933	397.399	401.373	3.75417	1.01018e-51	4.4017	3.26533e-53	Gm41907	Intron
chr1	86472014	86472952	22.3319	31.1342	76.3027	100.993	21.5428	24.8666	53.8443	80.0444	1.74182	0.000241589	1.52359	0.00170302	Gm41907,Gm41907,Gm41907	Intron,Promoter,Exon
chr1	86479113	86479449	11.5262	8.49114	57.7426	54.1035	6.55649	7.45998	34.3079	40.886	2.46925	8.54291e-05	2.41938	0.000495304	Intergenic	Intergenic
chr1	86492134	86493044	38.1804	37.7384	104.487	126.757	44.9588	42.2732	81.9576	97.3201	1.6084	5.20705e-05	1.03875	0.00725202	Intergenic	Intergenic
chr1	86503103	86505146	275.907	245.3	534.119	665.731	642.536	566.129	531.295	513.666	1.20232	2.99178e-10	-0.208331	0.115696	Intergenic	Intergenic
chr1	86509388	86509866	46.825	50.0034	101.737	128.303	73.9947	78.7442	99.1116	105.382	1.25238	0.00137133	0.419683	0.21878	Intergenic	Intergenic
chr1	86524726	86529257	989.088	960.443	2227.21	2160.02	1439.62	1442.26	2108.5	2082.88	1.1696	4.03367e-26	0.540497	4.81427e-14	Intergenic,Ptma	Intergenic,Promoter
chr1	86529846	86530020	5.76308	12.265	41.2447	26.7941	8.42977	9.11775	13.8184	21.8826	1.9357	0.0173339	1.01957	0.245532	Intergenic	Intergenic
chr1	86533730	86533986	7.20385	9.4346	36.4328	32.4621	5.61985	7.45998	16.2009	16.6999	2.05847	0.00828009	1.32583	0.152648	Intergenic	Intergenic
chr1	86580351	86580953	115.982	118.876	18.5601	20.0956	137.686	146.713	13.8184	19.5792	-2.59979	3.51476e-10	-3.10107	1.22963e-17	Pde6d,Pde6d	Intron,Intron
chr1	86581774	86583245	241.329	265.112	711.471	753.842	462.701	452.572	657.567	643.234	1.5354	2.72689e-20	0.507641	2.67841e-05	Pde6d,Pde6d,Pde6d,Pde6d,Cops7b,Cops7b,Cops7b,Cops7b,Pde6d,Pde6d,Intergenic	Intron,Intron,Promoter,Promoter,Promoter,Promoter,Promoter,Promoter,Exon,Exon,Intergenic
chr1	86586801	86587776	36.0192	47.173	108.611	144.276	62.755	82.0598	128.654	89.8339	1.61389	4.23396e-05	0.593214	0.102173	Cops7b	Promoter
chr1	86669524	86670938	109.498	74.5334	44.6817	53.073	153.609	169.093	59.0857	46.0687	-0.914513	0.0378816	-1.61402	4.05102e-08	Nppc,Nppc,Nppc,Nppc,Nppc,Intergenic	Intron,Promoter,Exon,Intron,Exon,Intergenic
chr1	86671810	86672056	25.9338	13.2084	5.49929	5.66799	29.0359	19.0644	8.10046	4.03101	-1.81644	0.0760708	-1.97019	0.015812	Intergenic	Intergenic
chr1	86733243	86733692	15.1281	8.49114	24.7468	14.4276	61.8183	33.9843	13.8184	16.124	0.711948	0.457193	-1.67661	0.00340184	Dis3l2	Promoter
chr1	86887154	86887281	14.4077	15.0954	4.12447	1.03054	15.9229	19.0644	2.85899	2.30343	-2.56035	0.0464691	-2.75551	0.00553518	Gm41909	Exon
chr1	87035622	87036121	7.20385	16.0388	52.2433	61.8326	14.0496	14.92	44.7908	53.5549	2.32445	0.000285231	1.7609	0.00165296	Intergenic	Intergenic
chr1	87127323	87127534	12.9669	34.908	3.43706	5.66799	21.5428	24.8666	13.8184	10.3655	-2.36969	0.0194573	-0.937275	0.205	Intergenic	Intergenic
chr1	87174246	87174649	11.5262	20.7561	31.6209	53.073	38.4023	36.471	48.6028	62.1927	1.41089	0.0446	0.563785	0.238774	Intergenic	Intergenic
chr1	87175816	87176448	16.5688	29.2473	95.5502	108.207	31.8458	19.8933	77.1927	67.9513	2.17289	2.90999e-06	1.49624	0.00119677	Intergenic	Intergenic
chr1	87180095	87181962	191.622	185.862	853.765	875.962	233.224	181.526	727.612	764.74	2.1953	2.10666e-41	1.85122	1.58564e-38	Intergenic	Intergenic
chr1	87206426	87206642	10.0854	7.54768	8.93635	8.24435	29.9725	27.3533	10.483	5.18273	-0.0440789	0.9736	-1.8572	0.0114063	Chrng,Chrng	Promoter,Promoter
chr1	87213260	87215265	263.661	264.169	689.474	754.873	454.271	483.241	671.862	747.465	1.45302	1.91502e-18	0.59658	1.0198e-06	Intergenic,Eif4e2,Eif4e2,Eif4e2,Eif4e2,Eif4e2,Eif4e2,Eif4e2,Eif4e2	Intergenic,Promoter,Promoter,Promoter,Promoter,Promoter,Promoter,Promoter,Promoter
chr1	87255153	87255820	95.8112	116.046	27.4965	23.1872	144.243	150.028	35.2608	12.093	-2.06638	1.07716e-06	-2.62959	0.000659127	Intergenic	Intergenic
chr1	87259105	87259652	54.0288	51.8903	19.9349	9.79016	48.7054	83.7175	20.4894	27.6412	-1.85152	0.00309679	-1.46818	0.00268121	Intergenic	Intergenic
chr1	87280228	87280547	4.32231	3.77384	35.7454	23.7025	7.49313	5.80221	19.0599	20.1551	2.86651	0.00203868	1.56457	0.0722678	Gm41911	Exon
chr1	87281711	87281981	4.32231	5.66076	30.2461	27.8247	4.68321	9.11775	24.3014	14.3965	2.55101	0.00444044	1.48093	0.100823	Gm41911	Exon
chr1	87315899	87316174	15.8485	26.4169	9.62376	5.66799	30.9092	47.2465	14.2949	9.21374	-1.47282	0.12589	-1.72804	0.00578101	Intergenic	Intergenic
chr1	87377942	87378439	56.19	54.7207	11.686	8.75962	144.243	162.462	9.52996	13.8206	-2.45009	5.57676e-05	-3.72972	5.42472e-23	Kcnj13	Exon
chr1	87378674	87379111	17.2892	15.0954	7.56153	6.18326	46.8321	47.2465	3.33549	6.9103	-1.24299	0.235102	-3.22196	6.16325e-07	Kcnj13	Exon
chr1	87406059	87406728	36.0192	30.1907	8.24894	5.15272	64.6283	80.402	21.9189	15.5482	-2.32238	0.00367128	-1.94728	2.34027e-05	Kcnj13	Promoter
chr1	87412742	87413031	18.0096	23.5865	4.81188	5.66799	35.5924	30.6688	7.14747	2.30343	-1.98052	0.0444512	-2.78093	0.000253148	Kcnj13	Promoter
chr1	87416945	87417462	21.6115	31.1342	8.93635	14.4276	60.8817	65.482	4.28848	6.9103	-1.16004	0.164036	-3.51365	6.89915e-10	Kcnj13	Promoter
chr1	87433184	87433558	31.6969	55.6642	0.687411	1.54581	78.6779	55.5354	0.476498	8.06202	-5.22748	4.73143e-07	-3.98778	0.0172654	Intergenic	Intergenic
chr1	87434161	87434417	11.5262	14.1519	9.62376	18.0345	29.9725	26.5244	4.28848	8.63788	0.119353	0.913335	-2.14247	0.00449064	Intergenic	Intergenic
chr1	87435187	87435472	18.0096	19.8127	2.74965	1.54581	46.8321	34.8132	3.81198	6.33444	-3.16382	0.00631969	-3.02201	8.15311e-06	Intergenic	Intergenic
chr1	87548935	87549131	15.1281	32.0777	8.24894	3.09163	3.74657	12.4333	4.76498	2.87929	-2.07552	0.0383789	-1.08309	0.410905	Ngef	Intron
chr1	87550706	87551621	79.2423	100.95	247.468	318.953	103.967	126.82	212.518	264.319	1.66037	1.26158e-09	1.04283	1.39032e-05	Ngef,LOC108167634	Intron,Promoter
chr1	87553776	87554031	5.04269	7.54768	17.8727	30.9163	3.74657	3.31555	19.5364	21.8826	1.97272	0.0380194	2.55421	0.00765121	Ngef	Intron
chr1	87555063	87555406	7.92423	13.2084	45.3692	56.6799	1.87328	5.80221	34.7843	30.5205	2.29258	0.00050994	3.0634	0.000247391	Ngef	Intron
chr1	87607387	87608146	38.9008	39.6253	106.549	132.94	72.1214	72.942	111.977	104.806	1.61135	4.04478e-05	0.580033	0.0808175	Intergenic	Intergenic
chr1	87620012	87622173	162.087	154.728	340.956	335.442	290.359	261.099	311.153	331.695	1.09301	7.61284e-07	0.221775	0.226625	Intergenic,Inpp5d,Inpp5d,Inpp5d,Inpp5d	Intergenic,Promoter,Promoter,Promoter,Promoter
chr1	87623526	87623992	20.1708	7.54768	35.7454	44.8286	19.6695	4.14443	39.0728	39.7342	1.5179	0.0399065	1.74578	0.0146631	Inpp5d	Promoter
chr1	87624865	87625873	36.7396	16.9823	146.419	124.696	31.8458	24.0377	115.312	109.413	2.31057	7.86074e-08	2.01327	1.32203e-07	Inpp5d	Promoter
chr1	87625978	87626995	88.6073	94.346	370.515	402.942	164.849	164.948	334.025	320.753	2.08258	9.1678e-20	0.989775	8.28758e-08	Inpp5d	Promoter
chr1	87632851	87633086	8.64462	6.60422	24.7468	23.7025	0.936641	3.31555	18.5834	9.7896	1.65889	0.0658575	2.71578	0.0269427	Inpp5d	Promoter
chr1	87639760	87640822	62.6735	38.6819	133.358	154.066	72.1214	39.7866	145.332	133.599	1.49319	7.14217e-05	1.32555	0.000133038	Inpp5d	Promoter
chr1	87648732	87649135	5.76308	1.88692	29.5587	29.3705	6.55649	3.31555	36.2138	21.3068	2.89966	0.00232391	2.56071	0.00230655	Inpp5d	Promoter
chr1	87650533	87651727	36.7396	28.3038	180.102	195.288	82.4244	53.8776	174.875	137.054	2.51937	1.75733e-13	1.20123	0.000165623	Inpp5d	Promoter
chr1	87656942	87657216	14.4077	8.49114	2.06223	11.336	22.4794	46.4176	8.57696	7.48616	-0.757743	0.570226	-2.1024	0.00264214	Inpp5d	Promoter
chr1	87657928	87658482	18.0096	18.8692	64.6167	48.9508	13.113	12.4333	37.6433	66.7996	1.62135	0.00518154	2.02896	0.000597359	Inpp5d	Promoter
chr1	87659037	87659957	38.9008	16.9823	152.605	159.734	42.1489	50.5621	142.473	112.292	2.457	2.21474e-09	1.45726	2.12385e-05	Inpp5d	Promoter
chr1	87792585	87793251	21.6115	13.2084	80.4271	66.47	14.0496	17.4066	66.7097	38.5825	2.05892	0.000127886	1.74296	0.00225873	Intergenic	Intergenic
chr1	87813590	87813944	21.6115	19.8127	48.8062	45.8592	32.7824	34.8132	40.9788	27.0654	1.18936	0.0498464	0.0131452	0.983777	Sag	Promoter
chr1	87828115	87828878	52.5881	50.9469	175.29	230.842	136.75	136.766	159.627	134.751	1.9731	6.0346e-10	0.107739	0.714506	Sag	Promoter
chr1	87848674	87849938	30.2562	18.8692	283.213	262.273	5.61985	25.6955	188.693	173.909	3.44913	4.99676e-26	3.52614	0.000471929	Gm38609,Gm38609	Intron,Exon
chr1	87850283	87850655	15.1281	12.265	63.2418	42.2523	10.3031	16.5777	34.7843	33.9757	1.93477	0.00216076	1.34779	0.0380579	Gm38609	Exon
chr1	87850754	87850960	9.365	9.4346	18.5601	21.1261	7.49313	9.11775	32.4019	18.4275	1.07963	0.250806	1.61429	0.0416745	Gm38609	Exon
chr1	87856903	87857138	5.76308	8.49114	32.9957	21.1261	6.55649	11.6044	20.4894	34.5515	1.93362	0.0303472	1.58684	0.0393661	Gm19582	Promoter
chr1	87862126	87862529	64.8346	70.7595	15.8105	22.1567	27.1626	23.2088	7.14747	20.1551	-1.82631	0.000527563	-0.894517	0.249345	Gm19582	Promoter
chr1	87866737	87866885	6.48346	2.83038	3.43706	4.63744	25.2893	11.6044	1.42949	4.60687	-0.214923	0.908026	-2.63464	0.0100689	Gm19582	Promoter
chr1	87875927	87876475	35.2988	26.4169	24.7468	15.4581	47.7687	63.8243	30.9724	17.8516	-0.630432	0.393354	-1.18703	0.0215135	Dgkd	Promoter
chr1	87877531	87878279	61.2327	61.3249	10.3112	3.09163	203.251	125.991	18.1069	9.21374	-3.23914	1.33667e-06	-3.5697	3.53201e-19	Dgkd	Promoter
chr1	87879630	87880227	17.2892	33.0211	10.9986	3.6069	73.058	80.402	12.3889	9.7896	-1.80259	0.0608637	-2.78457	3.7016e-09	Dgkd	Promoter
chr1	87890941	87891198	20.8912	4.7173	4.12447	7.72907	37.4657	41.4443	10.0065	5.18273	-1.11495	0.386386	-2.36247	0.000282613	Dgkd	Promoter
chr1	87899689	87900085	37.46	43.3992	15.8105	44.8286	74.9313	77.0864	18.1069	17.2758	-0.401321	0.575011	-2.10226	1.83246e-06	Dgkd	Promoter
chr1	87900887	87901407	28.8154	18.8692	131.296	135.516	30.9092	37.2999	111.501	77.1651	2.46843	1.42943e-09	1.46746	0.000357076	Dgkd	Promoter
chr1	87906429	87906911	24.4931	30.1907	6.1867	4.12217	47.7687	70.4554	13.3419	11.5172	-2.41913	0.00650536	-2.24888	1.70128e-05	Dgkd	Promoter
chr1	87931592	87931687	12.2465	13.2084	1.37482	0.515272	12.1763	12.4333	1.90599	0.575859	-3.80362	0.0140925	-3.2722	0.0102615	Usp40,Usp40	Exon,Exon
chr1	87935013	87935391	12.2465	11.3215	26.809	58.741	14.9863	14.92	25.7309	23.6102	1.86383	0.0111355	0.723223	0.310143	Usp40,Usp40	Exon,Exon
chr1	87935619	87935828	11.5262	7.54768	9.62376	12.8818	13.113	41.4443	7.14747	10.3655	0.234567	0.84523	-1.6518	0.0404599	Usp40,Usp40	Exon,Exon
chr1	87960116	87960437	3.60192	6.60422	36.4328	25.2483	6.55649	17.4066	31.4489	29.9446	2.61739	0.00339765	1.34431	0.0619725	Usp40,Usp40,Usp40,Usp40	Intron,Intron,Intron,Intron
chr1	88008105	88008689	44.6638	42.4557	79.0523	98.9321	81.4878	77.9153	69.0922	96.1684	1.03187	0.0185817	0.0493903	0.906473	Usp40,Usp40,Usp40,Usp40,Usp40,Usp40,Usp40,Usp40,Usp40,Usp40,Usp40,Usp40,Usp40,Usp40,Usp40,Intergenic	Intron,Intron,Intron,Intron,Intron,Promoter,Promoter,Promoter,Promoter,Promoter,Exon,Exon,Exon,Exon,Exon,Intergenic
chr1	88077219	88077407	1.44077	0	28.1839	29.3705	0.936641	0.828886	21.9189	23.6102	5.17353	0.000238569	4.69253	0.000582724	Ugt1a9	Promoter
chr1	88094572	88095369	41.7823	31.1342	123.047	142.215	30.9092	39.7866	101.494	99.6235	1.85532	1.3852e-06	1.50447	8.15013e-05	Ugt1a7c	Promoter
chr1	88133978	88134317	60.5123	55.6642	17.1853	15.9734	91.7909	92.8353	13.8184	20.7309	-1.81196	0.00122672	-2.42763	1.02085e-08	Ugt1a6a	Promoter
chr1	88205414	88205985	30.9765	43.3992	17.1853	38.1301	76.8046	88.6909	34.3079	25.9136	-0.412133	0.563044	-1.45483	0.000414706	Dnajb3,Dnajb3	Exon,Promoter
chr1	88217015	88217924	88.6073	76.4203	26.1216	35.0385	28.0992	58.8509	27.1604	44.917	-1.4272	0.0021494	-0.280481	0.646888	Intergenic	Intergenic
chr1	88229461	88230602	112.38	91.5157	41.9321	51.0119	86.171	67.1398	49.5558	63.9203	-1.13209	0.00574449	-0.43476	0.291932	Mroh2a	Promoter
chr1	88231534	88232351	90.7685	83.968	42.6195	30.401	42.1489	44.7599	57.6562	58.1617	-1.26695	0.0047727	0.41349	0.366878	Mroh2a	Promoter
chr1	88238595	88241222	236.286	226.431	112.735	110.268	161.102	170.751	125.319	135.327	-1.05405	5.57144e-05	-0.349936	0.177325	Mroh2a,Mroh2a	Promoter,Promoter
chr1	88275682	88278781	857.978	782.129	1855.32	2176.51	1410.58	1404.13	1814.5	1815.11	1.29717	4.52893e-24	0.366873	1.18719e-06	Hjurp,Hjurp,Hjurp,Hjurp,Hjurp,Hjurp,Hjurp,Hjurp,Hjurp,Hjurp,Intergenic	Intron,Intron,Promoter,Promoter,Exon,Exon,Intron,Intron,Exon,Exon,Intergenic
chr1	88278937	88280377	195.224	246.243	173.228	147.883	416.805	395.379	154.385	145.692	-0.458405	0.104782	-1.43499	1.46547e-17	Intergenic	Intergenic
chr1	88289987	88290251	15.8485	18.8692	48.8062	43.7981	18.7328	26.5244	59.5622	49.5238	1.41927	0.0238489	1.26552	0.0136489	Intergenic	Intergenic
chr1	88291440	88292057	54.0288	65.0988	14.4356	25.7636	44.0221	21.551	27.1604	32.8239	-1.55216	0.00701892	-0.124125	0.853497	Intergenic	Intergenic
chr1	88302576	88302792	28.8154	21.6996	2.06223	8.24435	8.42977	16.5777	3.81198	6.9103	-2.26071	0.0214284	-1.23691	0.243231	Intergenic	Intergenic
chr1	88345646	88345915	38.1804	29.2473	5.49929	7.72907	29.9725	29.011	11.436	7.48616	-2.34129	0.00312037	-1.63191	0.0187939	Trpm8	Promoter
chr1	88430711	88431023	32.4173	26.4169	0	5.66799	34.6557	30.6688	3.33549	6.33444	-3.35324	0.139478	-2.77329	0.00016842	Intergenic	Intergenic
chr1	88450706	88450970	15.1281	15.0954	8.93635	12.3665	29.0359	39.7866	13.8184	5.75859	-0.498984	0.627648	-1.80073	0.00937931	Gm29538,Gm29538,Gm29538	Intron,Intron,Intron
chr1	88475466	88475788	23.7727	34.908	17.1853	19.5803	63.6916	37.2999	26.6839	18.4275	-0.666452	0.373263	-1.15377	0.0340189	Gm28888	Promoter
chr1	88506526	88506619	4.32231	10.3781	2.74965	6.69853	15.9229	11.6044	0.952996	0	-0.610812	0.695995	-4.75374	0.00198852	Glrp1	Intron
chr1	88509714	88510404	40.3415	22.6431	89.3635	138.608	64.6283	31.4977	93.8701	88.6822	1.84403	5.44651e-05	0.933251	0.0286289	Glrp1,Glrp1,Glrp1,Intergenic	Intron,Promoter,Exon,Intergenic
chr1	88534194	88534328	7.92423	8.49114	2.74965	1.54581	17.7962	15.7488	0.476498	1.15172	-1.95071	0.218339	-4.40349	0.000611622	Intergenic	Intergenic
chr1	88543697	88543831	10.8058	12.265	4.12447	1.54581	16.8595	19.0644	0.952996	5.75859	-2.05143	0.133731	-2.45566	0.0173257	Intergenic	Intergenic
chr1	88556436	88556969	23.0523	17.9257	98.2998	173.647	10.3031	9.11775	126.272	115.172	2.72476	1.37186e-09	3.64013	3.6675e-15	Gm19589	Promoter
chr1	88566997	88567600	3.60192	1.88692	137.482	151.49	1.87328	9.94664	86.2461	96.7443	5.66896	4.68138e-17	3.91221	2.27061e-11	Gm41912	Intron
chr1	88575852	88576784	49.7065	37.7384	120.297	117.482	91.7909	93.6642	105.306	105.382	1.43549	0.000223286	0.18381	0.588249	Intergenic	Intergenic
chr1	88577938	88578173	15.1281	36.795	6.1867	1.03054	21.5428	19.0644	10.483	6.9103	-2.8909	0.0072598	-1.21522	0.133679	Intergenic	Intergenic
chr1	88578349	88578916	53.3085	42.4557	2.06223	9.27489	90.8542	79.5731	0.476498	4.60687	-3.03262	7.11928e-05	-5.10051	3.11102e-05	Intergenic	Intergenic
chr1	88581789	88582285	33.1377	24.53	8.93635	2.06109	32.7824	48.0754	4.28848	8.63788	-2.43278	0.00984418	-2.66534	7.29166e-05	Intergenic	Intergenic
chr1	88584359	88585153	124.627	122.65	50.8684	69.0464	254.766	280.993	61.9447	56.4341	-1.03856	0.0053343	-2.17672	4.01058e-21	Intergenic	Intergenic
chr1	88585574	88585738	12.2465	11.3215	8.24894	4.12217	22.4794	24.8666	2.38249	4.60687	-0.944647	0.438547	-2.77966	0.00131017	Intergenic	Intergenic
chr1	88586701	88588085	301.841	322.663	708.721	908.939	674.382	669.74	699.975	674.33	1.3758	5.96406e-15	0.0325446	0.802467	Intergenic	Intergenic
chr1	88588908	88589351	15.1281	15.0954	68.0537	68.5311	20.6061	22.3799	63.3742	75.4375	2.17604	6.3124e-05	1.68848	0.000308517	Intergenic	Intergenic
chr1	88600049	88601044	25.9338	22.6431	200.037	194.773	18.7328	13.2622	121.983	168.151	3.01619	5.81414e-18	3.18764	4.38647e-15	Intergenic	Intergenic
chr1	88631587	88631760	5.76308	4.7173	26.1216	22.1567	10.3031	1.65777	18.1069	10.3655	2.19452	0.0214931	1.27522	0.248075	Intergenic	Intergenic
chr1	88634279	88634944	65.555	42.4557	18.5601	13.9123	128.32	116.044	14.2949	23.6102	-1.74616	0.00388739	-2.70054	2.77178e-12	Intergenic	Intergenic
chr1	88635612	88635924	6.48346	0.94346	23.372	25.2483	0.936641	4.14443	19.5364	16.124	2.65265	0.012878	2.78184	0.0111601	Intergenic	Intergenic
chr1	88641804	88642522	55.4696	46.2296	24.0594	23.1872	117.08	133.451	36.2138	25.9136	-1.10933	0.0537661	-2.00592	1.24582e-08	Intergenic	Intergenic
chr1	88642826	88643128	4.32231	11.3215	34.3706	31.9468	9.36641	9.94664	22.8719	23.6102	2.11439	0.0111923	1.26585	0.100544	Intergenic	Intergenic
chr1	88644432	88644784	23.7727	11.3215	1.37482	9.79016	29.0359	31.4977	2.85899	3.45515	-1.62821	0.174716	-3.26825	4.00119e-05	Intergenic	Intergenic
chr1	88652513	88653304	30.2562	43.3992	156.73	181.376	30.9092	29.8399	123.413	123.81	2.21213	5.32706e-10	2.02553	1.55687e-08	Intergenic	Intergenic
chr1	88653450	88653987	19.4504	33.0211	74.2404	79.3518	15.9229	23.2088	56.7033	51.2514	1.56461	0.00201848	1.4588	0.00529467	Intergenic	Intergenic
chr1	88655574	88655947	36.0192	31.1342	11.686	12.8818	22.4794	25.6955	11.9124	13.8206	-1.45022	0.0473249	-0.908146	0.206634	Intergenic	Intergenic
chr1	88684700	88685585	34.5785	45.2861	22.6846	18.0345	115.207	119.36	24.7779	16.124	-0.972666	0.136434	-2.50975	5.1329e-11	Intergenic	Intergenic
chr1	88705678	88706186	59.7919	53.7772	138.17	182.406	111.46	97.8086	148.667	146.268	1.4968	1.31263e-05	0.496756	0.0768424	Intergenic	Intergenic
chr1	88708083	88708710	91.4888	92.4591	17.1853	11.336	136.75	126.82	35.2608	4.60687	-2.70469	2.35311e-08	-2.721	0.0495214	Intergenic	Intergenic
chr1	88709017	88709205	21.6115	21.6996	12.3734	10.3054	16.8595	43.931	5.71798	9.21374	-0.937102	0.2853	-2.04007	0.00822439	Intergenic	Intergenic
chr1	88720739	88720890	5.04269	9.4346	0	1.54581	17.7962	19.0644	3.33549	6.9103	-3.13602	0.119347	-1.86249	0.0400396	Intergenic	Intergenic
chr1	88721051	88721194	5.04269	8.49114	1.37482	1.03054	13.113	19.8933	2.38249	4.60687	-2.49699	0.175986	-2.25834	0.0229695	Intergenic	Intergenic
chr1	89015406	89016188	46.1046	22.6431	119.61	109.753	71.1847	80.402	158.674	153.178	1.71969	9.9674e-05	1.03929	0.000252518	Gm34194,Gm34194,1700067G17Rik,Gm34194,Intergenic	Intron,Promoter,Promoter,Exon,Intergenic
chr1	89019747	89020328	12.2465	30.1907	61.867	92.2336	9.36641	12.4333	43.3613	44.917	1.8864	0.00091374	2.01195	0.000942816	Intergenic	Intergenic
chr1	89042987	89043316	5.76308	6.60422	43.3069	27.8247	6.55649	7.45998	14.7714	27.6412	2.52574	0.00198786	1.59058	0.0668203	Intergenic	Intergenic
chr1	89068894	89071331	276.628	372.667	1327.39	1515.93	637.853	653.163	1369.93	1355.57	2.13689	7.38548e-40	1.07776	1.21661e-33	Intergenic,Sh3bp4	Intergenic,Promoter
chr1	89078599	89079775	49.7065	47.173	147.106	175.192	53.3886	60.5087	197.27	147.996	1.73417	3.32791e-07	1.59991	1.04975e-07	Sh3bp4	Promoter
chr1	89093797	89094033	21.6115	18.8692	3.43706	3.6069	23.416	31.4977	13.3419	5.75859	-2.52255	0.0155046	-1.51224	0.0437737	Gm34331	Exon
chr1	89130378	89131480	131.11	112.272	120.984	130.364	141.433	145.884	62.4212	72.5582	0.0448389	0.903213	-1.09242	0.000196576	Sh3bp4	Promoter
chr1	89131726	89132057	8.64462	5.66076	35.058	22.6719	6.55649	6.63109	12.3889	12.6689	1.99455	0.0220606	0.925698	0.363548	Sh3bp4	Promoter
chr1	89234943	89235235	9.365	9.4346	40.5573	36.5843	1.87328	13.2622	26.6839	21.3068	2.03607	0.00523805	1.64408	0.0679109	Intergenic	Intergenic
chr1	89235340	89235733	7.92423	9.4346	53.6181	39.6759	14.9863	14.0911	59.5622	46.0687	2.43043	0.00046517	1.86404	0.00069773	Intergenic	Intergenic
chr1	89453835	89455247	97.9723	106.611	420.008	402.942	93.6641	73.7709	322.113	342.06	2.01045	6.59087e-20	1.992	1.7623e-20	Intergenic,Agap1	Intergenic,Promoter
chr1	89455469	89455908	16.5688	19.8127	22.6846	28.8552	10.3031	7.45998	26.2074	35.1274	0.509336	0.518077	1.79155	0.0130271	Agap1	Promoter
chr1	89463248	89463396	7.92423	2.83038	15.8105	19.5803	0	3.31555	16.2009	11.5172	1.692	0.125336	3.0156	0.0221242	Agap1	Promoter
chr1	89555098	89555802	9.365	7.54768	71.4908	50.4966	14.9863	5.80221	32.8784	33.3998	2.83803	7.97873e-06	1.68752	0.0176297	Gm28499	Promoter
chr1	89563509	89563714	3.60192	8.49114	19.2475	26.7941	1.87328	4.97332	21.4424	19.0033	1.95903	0.0467402	2.54257	0.00984976	Gm28499	Promoter
chr1	89568870	89569449	10.0854	21.6996	62.5544	77.2907	11.2397	9.11775	56.2268	48.3721	2.16373	0.000167051	2.36681	4.96141e-05	Gm28499	Promoter
chr1	89570523	89570934	9.365	16.9823	30.9335	53.073	7.49313	9.11775	34.7843	37.4308	1.69408	0.0189156	2.11561	0.00187596	Gm28499	Promoter
chr1	89577010	89577369	15.8485	14.1519	31.6209	32.9774	8.42977	13.2622	31.9254	38.5825	1.10405	0.132219	1.69136	0.0111489	Gm41914	Exon
chr1	89613265	89613572	10.8058	6.60422	22.6846	35.5537	0.936641	10.7755	21.4424	32.2481	1.73149	0.0417177	2.1659	0.0177259	Gm41914	Promoter
chr1	89643686	89644520	33.8581	46.2296	232.345	278.762	33.7191	41.4443	285.899	206.157	2.68755	2.84413e-18	2.7081	3.0911e-20	4933400F21Rik	Exon
chr1	89742417	89742954	17.2892	6.60422	63.9293	88.1114	12.1763	12.4333	119.601	84.6512	2.63844	7.70515e-06	3.05449	8.34775e-11	4933400F21Rik	Promoter
chr1	89753611	89753792	1.44077	4.7173	10.3112	26.7941	0.936641	5.80221	20.0129	21.8826	2.64124	0.0316423	2.60344	0.00953556	4933400F21Rik	Promoter
chr1	89940339	89940713	21.6115	16.9823	43.3069	51.0119	28.0992	19.0644	47.1733	54.7066	1.28445	0.0380321	1.11544	0.0331906	Intergenic	Intergenic
chr1	89943301	89943543	7.92423	9.4346	31.6209	26.2788	14.9863	13.2622	41.9318	29.3688	1.74167	0.0356382	1.34044	0.0358353	Intergenic	Intergenic
chr1	90368601	90368959	5.76308	7.54768	28.1839	25.7636	9.36641	1.65777	43.3613	42.0377	2.02775	0.0218036	2.98742	6.80098e-05	Gm34992	Promoter
chr1	90592932	90593146	15.1281	7.54768	30.2461	41.737	14.9863	24.0377	36.6903	35.7032	1.65016	0.0310309	0.885479	0.1461	Intergenic	Intergenic
chr1	90602966	90603885	236.286	245.3	476.376	621.418	313.775	296.741	604.676	529.79	1.1913	2.68056e-09	0.895758	2.35931e-10	Intergenic,Cops8,Cops8	Intergenic,Promoter,Promoter
chr1	90633745	90634030	41.7823	41.5123	5.49929	8.75962	33.7191	16.5777	8.57696	17.2758	-2.52983	0.00043421	-0.963903	0.214292	Intergenic	Intergenic
chr1	90676640	90677036	26.6542	20.7561	9.62376	11.8512	52.4519	41.4443	25.2544	9.21374	-1.14148	0.183573	-1.4313	0.0191627	Gm9991	Promoter
chr1	90677560	90678388	185.139	173.597	76.9901	65.4395	327.824	380.459	106.259	91.5615	-1.337	1.24698e-05	-1.83829	1.1737e-20	Intergenic	Intergenic
chr1	90973290	90973750	29.5358	30.1907	70.116	83.474	49.642	41.4443	62.8977	80.0444	1.36505	0.00447473	0.650249	0.128349	Intergenic	Intergenic
chr1	90974268	90974518	2.88154	2.83038	35.7454	18.0345	6.55649	8.28886	16.2009	19.5792	3.22878	0.00197704	1.26373	0.15337	Intergenic	Intergenic
chr1	90974853	90975705	13.6873	22.6431	296.962	360.175	22.4794	24.8666	260.168	210.764	4.20837	2.6511e-35	3.31272	5.67939e-26	Intergenic	Intergenic
chr1	90998223	90999310	59.0715	50.9469	151.918	165.917	96.4741	111.071	116.265	125.537	1.52722	4.88961e-06	0.218119	0.491819	Intergenic,Lrrfip1,Lrrfip1,Lrrfip1,Lrrfip1,Lrrfip1,Lrrfip1,Lrrfip1,Lrrfip1,Lrrfip1,Lrrfip1,Lrrfip1,Lrrfip1,Lrrfip1,Lrrfip1,Lrrfip1,Lrrfip1,Lrrfip1,Lrrfip1,Lrrfip1,Lrrfip1,Lrrfip1,Lrrfip1,Lrrfip1,Lrrfip1,Lrrfip1,Lrrfip1,Lrrfip1,Lrrfip1,Lrrfip1,Lrrfip1,Lrrfip1,Lrrfip1,Lrrfip1,Lrrfip1,Lrrfip1,Lrrfip1,Lrrfip1	Intergenic,Promoter,Promoter,Promoter,Promoter,Promoter,Promoter,Promoter,Promoter,Promoter,Promoter,Promoter,Promoter,Promoter,Promoter,Promoter,Promoter,Promoter,Promoter,Promoter,Promoter,Promoter,Promoter,Promoter,Promoter,Promoter,Promoter,Promoter,Promoter,Promoter,Promoter,Promoter,Promoter,Promoter,Promoter,Promoter,Promoter,Promoter
chr1	91010159	91010572	11.5262	8.49114	29.5587	40.1912	44.0221	40.6154	28.1134	32.2481	1.79418	0.0190131	-0.488658	0.358793	Lrrfip1	Promoter
chr1	91023923	91024741	51.8677	58.4946	138.17	198.895	106.777	131.793	172.969	180.244	1.61692	3.41271e-06	0.56328	0.0305872	Lrrfip1	Promoter
chr1	91026981	91027283	8.64462	9.4346	48.8062	44.8286	6.55649	0	39.5493	37.4308	2.37544	0.000475624	3.56667	0.100602	Lrrfip1	Promoter
chr1	91033862	91034094	8.64462	12.265	20.6223	23.1872	4.68321	4.14443	15.2479	19.0033	1.07736	0.230919	1.9568	0.0452081	Lrrfip1	Promoter
chr1	91034217	91035019	12.9669	7.54768	113.423	124.18	12.1763	18.2355	149.144	109.413	3.5062	8.35433e-13	3.07981	3.57003e-13	Lrrfip1	Promoter
chr1	91037823	91038363	31.6969	25.4734	86.6138	86.0504	29.9725	37.2999	59.0857	74.8616	1.5881	0.000551367	0.988772	0.028999	Lrrfip1	Promoter
chr1	91041415	91041995	16.5688	11.3215	92.1131	100.993	13.113	9.94664	75.2867	73.7099	2.77583	1.73402e-08	2.69847	1.12492e-07	Lrrfip1	Promoter
chr1	91046134	91046666	20.8912	10.3781	81.802	116.967	17.7962	9.94664	112.93	78.3168	2.64534	2.09847e-07	2.7998	6.10667e-09	Lrrfip1	Promoter
chr1	91049232	91049712	21.6115	26.4169	49.4936	59.7715	59.0084	32.3266	45.2673	41.4618	1.19312	0.0360524	-0.0684744	0.90512	Lrrfip1	Promoter
chr1	91051549	91051954	14.4077	8.49114	35.058	45.8592	20.6061	9.11775	22.8719	21.8826	1.80747	0.0117945	0.60018	0.443898	Lrrfip1	Promoter
chr1	91052214	91054391	491.302	538.716	1128.04	1151.12	968.487	952.391	928.218	954.198	1.14761	5.66081e-17	-0.0293096	0.79294	Lrrfip1,Lrrfip1,Lrrfip1,Lrrfip1,Lrrfip1,Lrrfip1,Lrrfip1,Lrrfip1	Promoter,Promoter,Promoter,Promoter,Promoter,Promoter,Promoter,Promoter
chr1	91069512	91070161	21.6115	23.5865	105.174	92.2336	34.6557	33.1555	106.736	71.9823	2.12879	2.12749e-06	1.40136	0.000823814	Lrrfip1,Lrrfip1	Promoter,Promoter
chr1	91079768	91080973	35.2988	33.9646	384.95	475.08	48.7054	42.2732	372.145	372.581	3.63359	5.68758e-41	3.03679	5.80784e-40	Lrrfip1,Lrrfip1	Promoter,Promoter
chr1	91085972	91087299	69.1569	67.9292	165.666	177.769	74.9313	140.911	152.956	159.513	1.32519	2.34206e-05	0.528163	0.108589	Lrrfip1,Lrrfip1	Promoter,Promoter
chr1	91088083	91088626	4.32231	11.3215	55.6803	69.5617	5.61985	17.4066	58.1327	61.6169	3.04443	4.15192e-06	2.3586	5.45799e-05	Lrrfip1,Lrrfip1	Promoter,Promoter
chr1	91091549	91092918	74.1996	86.7984	164.979	176.223	148.926	174.066	132.943	145.692	1.08801	0.000504092	-0.215635	0.427405	Intergenic	Intergenic
chr1	91093183	91093716	33.1377	50.0034	18.5601	36.5843	131.13	115.215	33.3549	35.1274	-0.577231	0.390491	-1.84699	5.14991e-08	Intergenic	Intergenic
chr1	91182877	91183200	11.5262	15.0954	2.74965	3.09163	24.3527	26.5244	8.57696	7.48616	-2.18102	0.0838212	-1.6612	0.0247443	Ramp1	Promoter
chr1	91184960	91185187	28.095	16.9823	5.49929	3.6069	7.49313	12.4333	1.90599	4.60687	-2.32714	0.0187025	-1.63415	0.17753	Ramp1	Promoter
chr1	91187362	91187717	11.5262	4.7173	34.3706	32.4621	14.9863	9.94664	20.0129	23.6102	2.01241	0.0140757	0.811118	0.295344	Ramp1	Promoter
chr1	91188687	91189258	10.0854	16.9823	43.9943	63.8937	10.3031	4.14443	47.1733	33.3998	2.01499	0.00155212	2.49998	0.000409512	Ramp1	Promoter
chr1	91191893	91192043	3.60192	13.2084	2.06223	6.69853	8.42977	22.3799	3.81198	2.30343	-0.906429	0.559275	-2.32717	0.0291536	Ramp1	Promoter
chr1	91192189	91192808	58.3512	43.3992	26.1216	26.2788	74.9313	81.2309	24.3014	23.0343	-0.96136	0.0944316	-1.7216	4.53988e-05	Ramp1	Promoter
chr1	91201118	91201370	34.5785	27.3604	6.87411	8.24435	20.6061	34.8132	8.57696	8.06202	-2.0318	0.0113704	-1.73844	0.0175888	Ramp1	Promoter
chr1	91216458	91216784	4.32231	1.88692	35.7454	49.4661	6.55649	5.80221	36.6903	40.3101	3.73617	1.72506e-05	2.64161	0.000179442	Intergenic	Intergenic
chr1	91231875	91232112	4.32231	1.88692	26.1216	28.8552	8.42977	0	21.9189	23.0343	3.10858	0.00186629	2.42366	0.321426	Intergenic	Intergenic
chr1	91235474	91235773	7.20385	0.94346	30.2461	51.0119	8.42977	4.14443	21.4424	24.1861	3.25224	0.00027522	1.87155	0.0276995	Intergenic	Intergenic
chr1	91239872	91240000	12.2465	4.7173	9.62376	3.6069	21.5428	11.6044	3.33549	3.45515	-0.386029	0.790499	-2.28371	0.0212937	Intergenic	Intergenic
chr1	91240735	91241208	17.2892	26.4169	15.1231	25.2483	69.3115	83.7175	10.483	15.5482	-0.10042	0.910089	-2.56671	5.33291e-08	Intergenic	Intergenic
chr1	91249622	91252436	308.325	345.307	879.199	982.108	402.756	513.91	841.019	775.682	1.51287	3.70299e-22	0.816519	3.35046e-10	Intergenic,Ube2f,Ube2f,Ube2f,Ube2f,Ube2f,Ube2f,Ube2f,Ube2f	Intergenic,Promoter,Promoter,Promoter,Promoter,Promoter,Promoter,Promoter,Promoter
chr1	91259867	91260174	10.8058	7.54768	22.6846	19.5803	42.1489	39.7866	10.483	10.3655	1.19232	0.199218	-1.97386	0.000916065	Ube2f,Ube2f	Promoter,Promoter
chr1	91264574	91264821	9.365	17.9257	0	1.54581	35.5924	21.551	0	4.03101	-4.02514	0.0120913	-3.84297	0.0938107	Ube2f,Ube2f	Promoter,Promoter
chr1	91278255	91278886	56.19	46.2296	21.3098	21.1261	155.482	179.039	30.9724	32.2481	-1.27394	0.0281849	-2.40556	2.81139e-15	Intergenic	Intergenic
chr1	91279205	91279421	25.2135	20.7561	15.1231	12.8818	63.6916	64.6531	17.1539	13.8206	-0.721008	0.390043	-2.04622	2.04529e-05	Intergenic	Intergenic
chr1	91293740	91294199	28.8154	25.4734	4.81188	15.9734	48.7054	53.8776	10.483	4.60687	-1.36483	0.125675	-2.74501	4.94621e-06	Intergenic	Intergenic
chr1	91294331	91294496	13.6873	14.1519	2.74965	0.515272	18.7328	21.551	8.10046	2.87929	-3.15451	0.0246061	-1.85738	0.0375567	Intergenic	Intergenic
chr1	91297597	91300158	213.954	236.809	796.022	918.214	471.131	469.979	779.551	667.996	1.9306	1.61927e-30	0.622487	6.58338e-07	Intergenic,Scly,Scly,Scly,Scly,Scly,Scly	Intergenic,Promoter,Promoter,Promoter,Promoter,Promoter,Promoter
chr1	91369492	91369686	8.64462	14.1519	4.12447	3.09163	22.4794	19.0644	3.81198	2.30343	-1.66099	0.206082	-2.74836	0.00271691	Fam132b	Promoter
chr1	91380523	91380937	18.0096	15.0954	49.4936	43.7981	29.0359	26.5244	44.7908	55.2824	1.48827	0.0182162	0.84833	0.0955676	Ilkap,Ilkap,Ilkap,Ilkap,Ilkap,Ilkap,Ilkap,Ilkap,Ilkap	Intron,Intron,Intron,Intron,Intron,Intron,Intron,Intron,Intron
chr1	91412336	91414725	283.111	314.172	775.4	809.492	603.197	592.654	742.86	758.406	1.4105	1.14339e-18	0.32814	0.00345053	Hes6,Hes6,Hes6,Hes6,Hes6,Hes6,Hes6,Hes6,Hes6,Hes6,Hes6,Hes6,Hes6,Hes6,Intergenic	Exon,Exon,Promoter,Intron,Intron,Exon,Exon,Intron,Promoter,Exon,Intron,Intron,Exon,Exon,Intergenic
chr1	91437610	91438394	17.2892	33.9646	77.6775	99.4474	24.3527	22.3799	58.1327	66.2237	1.80957	0.000299561	1.41233	0.00313868	Per2,Per2,Per2,Per2,Per2,Per2	Intron,Intron,Intron,Exon,Exon,Exon
chr1	91455937	91456761	28.095	23.5865	85.239	54.6188	27.1626	27.3533	54.3208	63.9203	1.42753	0.00723328	1.11555	0.0194248	Per2,Per2	Intron,Intron
chr1	91458211	91460271	458.885	531.168	1086.11	1379.38	897.302	926.695	1159.32	963.987	1.31946	1.07668e-16	0.220293	0.0543692	Per2,Per2,Per2,Per2,Per2,Per2,Intergenic	Intron,Intron,Promoter,Promoter,Exon,Exon,Intergenic
chr1	91492856	91493152	25.9338	36.795	4.12447	5.66799	28.0992	33.1555	7.62397	5.18273	-2.66343	0.00169725	-2.24983	0.00169865	Intergenic	Intergenic
chr1	91523837	91524080	15.1281	9.4346	40.5573	31.4316	13.113	19.0644	45.2673	31.6722	1.5354	0.0383157	1.2549	0.0423283	Intergenic	Intergenic
chr1	91539638	91541378	285.272	274.547	1008.43	1186.16	664.079	673.056	1110.72	1042.3	1.97095	7.23898e-37	0.68762	1.53566e-12	Asb1,Asb1,Asb1,Asb1	Promoter,Promoter,Promoter,Promoter
chr1	91563274	91563551	5.04269	2.83038	30.9335	19.065	14.0496	1.65777	17.6304	25.9136	2.63901	0.00869716	1.49027	0.119274	Intergenic	Intergenic
chr1	91600702	91601006	33.1377	22.6431	4.81188	5.66799	59.945	27.3533	7.14747	10.3655	-2.41071	0.00620497	-2.32106	0.000381115	Intergenic	Intergenic
chr1	91612945	91613412	87.1665	74.5334	7.56153	8.24435	47.7687	49.7332	1.42949	4.60687	-3.35221	8.1819e-10	-4.05785	1.44686e-08	Gm28380	Promoter
chr1	91626271	91626373	12.9669	11.3215	2.06223	0.515272	16.8595	13.2622	2.38249	3.45515	-3.29673	0.0290217	-2.37539	0.0214637	Intergenic	Intergenic
chr1	91674364	91674554	8.64462	8.49114	19.2475	24.2178	3.74657	0	12.8654	15.5482	1.34484	0.145587	2.97264	0.0222554	Intergenic	Intergenic
chr1	91825288	91825535	25.2135	20.7561	0.687411	4.12217	27.1626	43.931	8.10046	2.87929	-3.19741	0.00372343	-2.67374	0.00030321	LOC108167658	Intron
chr1	91831204	91831727	14.4077	33.9646	5.49929	15.9734	69.3115	71.2842	9.52996	4.03101	-1.14554	0.232795	-3.34796	8.68321e-10	LOC108167658,LOC108167658	Exon,Promoter
chr1	91831909	91832377	9.365	29.2473	4.81188	6.18326	50.5786	41.4443	11.436	13.2447	-1.79445	0.0973761	-1.90025	0.000733655	LOC108167658,LOC108167658	Exon,Promoter
chr1	91897158	91897388	10.0854	5.66076	4.81188	2.06109	29.9725	31.4977	4.28848	5.75859	-1.22178	0.428984	-2.62176	0.000366813	Intergenic	Intergenic
chr1	91941466	91942030	77.0812	93.4026	11.686	14.4276	82.4244	68.7976	2.85899	18.4275	-2.69666	6.84782e-08	-2.83641	0.0262007	Hdac4,Hdac4,Hdac4,Hdac4,Hdac4,Hdac4,Hdac4	Intron,Intron,Intron,Intron,Intron,Intron,Intron
chr1	91942639	91943068	69.1569	55.6642	20.6223	21.1261	48.7054	76.2576	22.3954	12.093	-1.58218	0.00312775	-1.84958	0.000432173	Hdac4,Hdac4,Hdac4,Hdac4,Hdac4,Hdac4,Hdac4	Intron,Intron,Intron,Intron,Intron,Intron,Intron
chr1	91954710	91955576	33.1377	33.0211	136.795	228.265	21.5428	11.6044	158.197	178.516	2.46735	6.92996e-11	3.35984	1.4059e-18	Hdac4,Hdac4,Hdac4,Hdac4,Hdac4,Hdac4,Hdac4,Hdac4,Hdac4,Hdac4,Hdac4,Hdac4,Hdac4,Hdac4,Hdac4,Hdac4,Hdac4,Hdac4,Hdac4,Hdac4,Hdac4	Intron,Intron,Intron,Intron,Intron,Intron,Intron,Exon,Exon,Exon,Exon,Exon,Exon,Exon,Intron,Intron,Intron,Intron,Intron,Intron,Intron
chr1	91956246	91956625	10.0854	13.2084	54.9929	56.6799	7.49313	5.80221	52.8913	38.0067	2.27188	0.000219081	2.78158	3.38775e-05	Hdac4,Hdac4,Hdac4,Hdac4,Hdac4,Hdac4,Hdac4	Intron,Intron,Intron,Intron,Intron,Intron,Intron
chr1	92004092	92004589	20.1708	17.9257	13.0608	7.72907	59.945	48.9043	9.52996	21.8826	-0.885621	0.350536	-1.80539	0.00130412	Hdac4,Hdac4,Hdac4,Hdac4,Hdac4,Hdac4,Hdac4,LOC108167659	Intron,Intron,Intron,Intron,Intron,Intron,Intron,Exon
chr1	92034309	92034680	10.8058	11.3215	46.0566	39.1606	3.74657	7.45998	43.3613	42.0377	1.94535	0.00465173	2.91353	3.49847e-05	Hdac4,Hdac4,Hdac4,Hdac4,Hdac4,Hdac4,Hdac4	Intron,Intron,Intron,Intron,Intron,Intron,Intron
chr1	92035888	92036345	10.0854	9.4346	39.1824	28.3399	6.55649	16.5777	20.4894	14.9723	1.78507	0.0210608	0.608571	0.495233	Hdac4,Hdac4,Hdac4,Hdac4,Hdac4,Hdac4,Hdac4	Intron,Intron,Intron,Intron,Intron,Intron,Intron
chr1	92042083	92042934	55.4696	66.9857	14.4356	23.1872	180.772	153.344	17.1539	19.0033	-1.68876	0.00270134	-3.21027	9.94848e-22	Hdac4,Hdac4,Hdac4,Hdac4,Hdac4,Hdac4,Hdac4	Intron,Intron,Intron,Intron,Intron,Intron,Intron
chr1	92050626	92052627	126.788	130.198	158.105	193.742	391.516	404.497	134.372	156.058	0.456061	0.135572	-1.45749	5.7844e-17	Hdac4,Hdac4,Hdac4,Hdac4,Hdac4,Hdac4	Intron,Intron,Intron,Intron,Intron,Intron
chr1	92055185	92055761	28.8154	16.0388	22.6846	12.3665	57.1351	62.9954	10.9595	5.75859	-0.373038	0.673304	-2.82835	2.8803e-07	Hdac4,Hdac4,Hdac4,Hdac4,Hdac4,Hdac4	Intron,Intron,Intron,Intron,Intron,Intron
chr1	92059691	92059998	13.6873	20.7561	11.686	10.8207	38.4023	42.2732	9.05346	11.5172	-0.60882	0.53161	-1.97756	0.00106246	Hdac4,Hdac4,Hdac4,Hdac4,Hdac4,Hdac4	Intron,Intron,Intron,Intron,Intron,Intron
chr1	92061707	92062017	7.20385	0.94346	33.6832	34.0079	6.55649	7.45998	25.2544	19.5792	2.98847	0.00138888	1.67711	0.0426441	Hdac4,Hdac4,Hdac4,Hdac4,Hdac4,Hdac4	Intron,Intron,Intron,Intron,Intron,Intron
chr1	92063925	92064840	131.83	146.236	151.918	149.944	463.637	473.294	168.204	127.841	0.1201	0.713149	-1.65765	1.40285e-21	Hdac4,Hdac4,Hdac4,Hdac4,Hdac4,Hdac4	Intron,Intron,Intron,Intron,Intron,Intron
chr1	92069543	92069799	10.0854	7.54768	7.56153	12.3665	47.7687	14.0911	4.28848	6.33444	0.177793	0.889329	-2.54454	0.00204844	Hdac4,Hdac4,Hdac4,Hdac4,Hdac4,Hdac4	Intron,Intron,Intron,Intron,Intron,Intron
chr1	92076308	92076674	19.4504	34.908	9.62376	2.57636	40.2756	37.2999	8.10046	9.21374	-2.1826	0.0231656	-2.16616	0.000514211	Hdac4,Hdac4,Hdac4,Hdac4,Hdac4,Hdac4	Intron,Intron,Intron,Intron,Intron,Intron
chr1	92079714	92080711	158.485	207.561	94.1754	96.3558	538.569	557.012	115.789	119.203	-0.938259	0.00226375	-2.22198	1.0453e-46	Hdac4,Hdac4,Hdac4,Hdac4,Hdac4,Hdac4	Intron,Intron,Intron,Intron,Intron,Intron
chr1	92082155	92082332	1.44077	5.66076	19.9349	19.065	5.61985	9.11775	11.9124	16.6999	2.50539	0.0286902	0.94721	0.331259	Hdac4,Hdac4,Hdac4,Hdac4,Hdac4,Hdac4	Intron,Intron,Intron,Intron,Intron,Intron
chr1	92082382	92083665	74.92	50.9469	169.791	146.337	193.885	196.446	172.969	157.209	1.31821	0.000156786	-0.240471	0.314663	Hdac4,Hdac4,Hdac4,Hdac4,Hdac4,Hdac4	Intron,Intron,Intron,Intron,Intron,Intron
chr1	92086129	92087327	131.11	132.084	76.9901	79.3518	233.224	211.366	100.541	62.7686	-0.750767	0.0287341	-1.43798	1.11562e-07	Hdac4,Hdac4,Hdac4,Hdac4,Hdac4,Hdac4	Intron,Intron,Intron,Intron,Intron,Intron
chr1	92118833	92119860	161.366	221.713	50.8684	71.1075	443.968	513.081	64.8037	77.7409	-1.64102	7.21328e-07	-2.753	2.04481e-49	Hdac4,Hdac4,Hdac4,Hdac4,Hdac4	Intron,Intron,Intron,Intron,Intron
chr1	92127467	92128066	39.6212	25.4734	9.62376	16.4887	44.9588	58.8509	16.2009	14.9723	-1.31189	0.0883467	-1.73601	0.000945724	Hdac4,Hdac4,Hdac4,Hdac4,Hdac4	Intron,Intron,Intron,Intron,Intron
chr1	92129188	92129454	12.9669	30.1907	2.06223	4.63744	24.3527	29.8399	2.38249	4.60687	-2.65189	0.0145262	-2.97626	0.000320438	Hdac4,Hdac4,Hdac4,Hdac4,Hdac4	Intron,Intron,Intron,Intron,Intron
chr1	92130039	92131015	90.7685	88.6853	28.1839	29.8858	172.342	161.633	25.2544	15.5482	-1.62653	0.000211496	-3.01911	5.24417e-19	Hdac4,Hdac4,Hdac4,Hdac4,Hdac4	Intron,Intron,Intron,Intron,Intron
chr1	92164696	92165068	16.5688	16.0388	16.4979	7.72907	35.5924	31.4977	10.483	13.8206	-0.440951	0.664684	-1.469	0.0212778	Hdac4,Hdac4,Hdac4,Hdac4,Hdac4	Intron,Intron,Intron,Intron,Intron
chr1	92178076	92178648	43.2231	44.3426	36.4328	23.1872	116.144	99.4664	26.2074	29.3688	-0.561626	0.360805	-1.95716	1.15116e-07	Hdac4,Hdac4,Hdac4,Hdac4,Hdac4	Intron,Intron,Intron,Intron,Intron
chr1	92179558	92181365	744.878	834.019	1682.1	1864.77	1133.34	1226.75	1704.43	1497.23	1.16971	2.32045e-20	0.440157	1.94373e-06	Hdac4,Hdac4,Hdac4,Hdac4,Hdac4,Hdac4,Hdac4,Hdac4,Hdac4,Hdac4,Hdac4	Intron,Intron,Intron,Intron,Intron,Promoter,Promoter,Promoter,Exon,Exon,Exon
chr1	92187253	92187382	8.64462	4.7173	10.3112	10.8207	0.936641	5.80221	16.2009	17.2758	0.648808	0.607949	2.28256	0.0346097	Hdac4,Hdac4	Intron,Intron
chr1	92215404	92215701	7.20385	9.4346	27.4965	28.8552	3.74657	6.63109	17.6304	24.7619	1.76926	0.0355885	2.01686	0.0248943	Intergenic	Intergenic
chr1	92216147	92217578	27.3746	39.6253	158.105	239.601	22.4794	14.92	150.573	207.309	2.58502	1.63693e-12	3.26693	1.85711e-18	Intergenic	Intergenic
chr1	92225159	92225690	12.2465	19.8127	50.8684	73.6838	6.55649	26.5244	55.7503	47.7963	1.9764	0.000801908	1.6308	0.00945935	Intergenic	Intergenic
chr1	92250627	92251443	20.1708	6.60422	107.924	116.451	13.113	6.63109	109.118	126.689	3.02529	2.80303e-09	3.59594	3.68746e-14	Intergenic	Intergenic
chr1	92371508	92372203	26.6542	38.6819	59.8048	90.6878	36.529	48.9043	53.3678	55.8583	1.21627	0.0174379	0.350751	0.467031	Intergenic	Intergenic
chr1	92372230	92372996	18.0096	16.9823	133.358	178.799	13.113	25.6955	130.56	170.454	3.15658	1.57108e-14	2.93953	8.27328e-14	Intergenic	Intergenic
chr1	92379100	92379435	5.76308	3.77384	48.8062	45.3439	6.55649	5.80221	7.14747	8.06202	3.28095	1.56883e-05	0.299652	0.811666	Intergenic,Gm35992,Gm35992	Intergenic,Promoter,Promoter
chr1	92394384	92394611	6.48346	3.77384	19.2475	24.733	3.74657	10.7755	18.5834	13.2447	2.08369	0.0376852	1.12088	0.249264	Intergenic	Intergenic
chr1	92445001	92445151	8.64462	9.4346	0	1.54581	22.4794	24.8666	0	0.575859	-3.45181	0.0606196	-6.49381	0.000177288	Ndufa10	Intron
chr1	92473038	92474629	231.964	234.922	494.249	523.516	315.648	311.661	557.503	452.049	1.12506	1.15237e-09	0.688246	1.00454e-05	Ndufa10,Ndufa10,Ndufa10,Intergenic	Intron,Promoter,Exon,Intergenic
chr1	92536947	92537296	25.2135	24.53	10.3112	6.69853	33.7191	69.6265	9.52996	8.63788	-1.55941	0.0729678	-2.50981	3.08157e-05	Intergenic	Intergenic
chr1	92633119	92633275	12.9669	12.265	0.687411	10.8207	23.416	29.8399	4.76498	5.18273	-1.1046	0.425704	-2.42449	0.00181111	Intergenic	Intergenic
chr1	92641137	92642467	111.66	124.537	305.211	302.98	198.568	155.831	282.087	247.043	1.36725	1.00412e-08	0.582039	0.0074319	Myeov2,Myeov2,Myeov2,Myeov2,Myeov2,Myeov2,Intergenic	Intron,Intron,Promoter,Promoter,Exon,Exon,Intergenic
chr1	92647671	92649082	96.5315	105.668	299.024	333.381	175.152	174.066	261.597	276.988	1.64855	1.03156e-11	0.624588	0.00180842	Otos,Otos,Otos,Otos,Otos,Otos,Otos,Otos,Otos,Intergenic	Intron,Intron,Intron,Promoter,Promoter,Promoter,Exon,Exon,Exon,Intergenic
chr1	92651427	92651544	9.365	6.60422	4.81188	5.15272	12.1763	9.94664	0.952996	2.30343	-0.684589	0.633662	-2.78868	0.0273104	Intergenic	Intergenic
chr1	92675821	92676681	31.6969	39.6253	105.174	93.7794	32.7824	49.7332	102.447	88.6822	1.48517	0.000487947	1.20722	0.00222358	Intergenic	Intergenic
chr1	92678856	92679176	6.48346	0.94346	35.058	44.8286	8.42977	8.28886	20.4894	31.0964	3.3565	0.000155479	1.62263	0.0363322	Intergenic	Intergenic
chr1	92695831	92696072	3.60192	6.60422	20.6223	22.1567	5.61985	9.94664	25.7309	31.6722	2.08969	0.0393103	1.87077	0.0134533	Intergenic	Intergenic
chr1	92708030	92708192	2.16115	0.94346	16.4979	16.4887	3.74657	4.14443	3.81198	12.6689	3.36726	0.0127742	1.05167	0.432269	Intergenic	Intergenic
chr1	92708328	92708465	2.88154	4.7173	6.1867	9.79016	0.936641	0.828886	16.6774	17.8516	1.09012	0.471358	4.29338	0.00277659	Intergenic	Intergenic
chr1	92742159	92742699	15.8485	11.3215	54.9929	52.5577	6.55649	25.6955	51.9383	48.3721	1.97308	0.0012899	1.62116	0.0101245	Intergenic	Intergenic
chr1	92749298	92749865	12.2465	8.49114	85.239	102.539	13.113	8.28886	68.1392	64.4962	3.16234	1.73292e-09	2.64246	9.65764e-07	Intergenic	Intergenic
chr1	92751689	92752190	23.0523	12.265	55.6803	64.9242	16.8595	4.97332	65.2802	55.8583	1.75512	0.00284679	2.49476	2.95266e-05	Intergenic,Gm36102	Intergenic,Promoter
chr1	92798338	92798901	14.4077	22.6431	46.0566	49.4661	7.49313	20.7222	41.4553	52.979	1.37931	0.0279046	1.72665	0.00538101	Intergenic	Intergenic
chr1	92799310	92800338	48.9862	30.1907	170.478	223.628	46.8321	35.6421	191.552	175.637	2.3021	6.1708e-11	2.16037	6.93389e-13	Intergenic	Intergenic
chr1	92805106	92806158	108.058	108.498	56.3677	40.1912	190.138	242.035	64.8037	67.3755	-1.17198	0.00353681	-1.71147	2.09716e-11	Intergenic	Intergenic
chr1	92849551	92849790	5.04269	2.83038	21.3098	27.3094	16.8595	10.7755	16.6774	14.9723	2.60485	0.00947688	0.201984	0.821626	Gpc1,Mir149,Gpc1	Promoter,Promoter,Promoter
chr1	92850024	92850614	11.5262	29.2473	40.5573	74.7144	18.7328	20.7222	55.2738	56.4341	1.52385	0.0205438	1.4996	0.00308626	Gpc1,Mir149,Gpc1	Promoter,Promoter,Promoter
chr1	92905704	92906478	25.9338	22.6431	105.861	106.146	60.8817	61.3376	88.1521	95.5925	2.12092	8.56339e-07	0.587407	0.106516	Intergenic,Dusp28	Intergenic,Promoter
chr1	92906623	92907893	220.438	219.826	777.462	834.74	463.637	425.219	716.176	837.298	1.87304	2.67558e-30	0.805314	1.19117e-10	Intergenic,Dusp28	Intergenic,Promoter
chr1	92920852	92921309	16.5688	16.0388	96.2376	79.3518	12.1763	15.7488	58.6092	60.4652	2.42592	9.14136e-07	2.08691	7.4648e-05	Intergenic	Intergenic
chr1	92921875	92922108	15.1281	28.3038	6.1867	3.09163	37.4657	14.92	2.85899	4.60687	-2.24137	0.0285668	-2.81844	0.00124103	Intergenic	Intergenic
chr1	92933598	92935493	332.097	325.494	1053.11	1266.02	683.748	702.067	1050.68	1008.9	1.81893	1.83155e-32	0.571668	4.28894e-09	Capn10,9430060I03Rik,9430060I03Rik	Promoter,Exon,Intron
chr1	92953175	92953327	5.76308	0.94346	2.06223	2.06109	14.9863	18.2355	2.38249	3.45515	-0.723361	0.75453	-2.52044	0.0114532	Gpr35	Promoter
chr1	92958526	92958657	0.720385	0.94346	8.24894	16.4887	0	3.31555	12.8654	10.3655	3.91627	0.0231857	2.76279	0.0461456	Gpr35	Promoter
chr1	92971615	92973677	62.6735	43.3992	723.157	762.602	33.7191	34.8132	651.849	633.444	3.78984	2.00901e-67	4.22828	2.0128e-86	Gpr35	Promoter
chr1	92974464	92975129	9.365	6.60422	55.6803	49.9813	8.42977	11.6044	56.2268	50.6756	2.70994	4.77002e-05	2.40953	3.37072e-05	Gpr35	Promoter
chr1	92976339	92977125	14.4077	6.60422	66.6789	103.054	18.7328	9.94664	85.2931	96.7443	2.98532	1.99307e-07	2.6791	1.53418e-08	Gpr35	Promoter
chr1	92978584	92979215	15.8485	12.265	62.5544	62.3479	11.2397	9.94664	73.8572	51.2514	2.14213	0.000182862	2.56696	4.19016e-06	Gpr35,Gpr35	Promoter,Promoter
chr1	92992219	92992787	12.9669	22.6431	76.9901	96.8711	7.49313	6.63109	63.3742	78.8926	2.30915	5.98608e-06	3.33439	7.49485e-09	Intergenic	Intergenic
chr1	93014460	93014789	24.4931	29.2473	62.5544	53.073	39.3389	52.2198	56.2268	57.01	1.1081	0.043029	0.30332	0.522655	Intergenic	Intergenic
chr1	93029232	93029772	9.365	6.60422	64.6167	56.1646	0.936641	3.31555	47.6498	38.5825	2.90176	5.01011e-06	4.30629	1.80836e-06	Kif1a,Kif1a,Kif1a,Kif1a,Kif1a,Kif1a	Intron,Intron,Intron,Intron,Intron,Intron
chr1	93038431	93038589	4.32231	1.88692	12.3734	19.065	4.68321	1.65777	9.52996	21.8826	2.31396	0.0613026	2.32344	0.039263	Kif1a,Kif1a,Kif1a,Kif1a,Kif1a,Kif1a	Intron,Intron,Intron,Intron,Intron,Intron
chr1	93068933	93070320	23.7727	19.8127	211.035	221.567	30.9092	10.7755	159.15	170.454	3.30223	2.25129e-21	2.99121	2.31292e-05	Kif1a,Kif1a,Kif1a,Kif1a,Kif1a,Kif1a	Intron,Intron,Intron,Intron,Intron,Intron
chr1	93070908	93072038	44.6638	28.3038	463.315	500.844	32.7824	32.3266	456.962	329.391	3.70141	4.70791e-45	3.59616	1.09733e-41	Kif1a,Kif1a,Kif1a,Kif1a,Kif1a,Kif1a	Intron,Intron,Intron,Intron,Intron,Intron
chr1	93072078	93072804	23.0523	6.60422	69.4285	63.3784	16.8595	29.8399	92.9171	62.1927	2.12949	0.000696849	1.72568	0.000342569	Kif1a,Kif1a,Kif1a,Kif1a,Kif1a,Kif1a,Kif1a,Kif1a,Kif1a,Kif1a,Kif1a,Kif1a,Kif1a,Kif1a,Kif1a,Kif1a,Kif1a,Kif1a	Intron,Intron,Intron,Intron,Intron,Intron,Exon,Exon,Exon,Exon,Exon,Exon,Intron,Intron,Intron,Intron,Intron,Intron
chr1	93080860	93081483	30.9765	21.6996	63.9293	82.4435	23.416	18.2355	77.6692	48.3721	1.46728	0.00414671	1.60442	0.00175216	Kif1a,Kif1a,Kif1a,Kif1a,Kif1a,Kif1a,Kif1a	Intron,Intron,Intron,Intron,Intron,Intron,Promoter
chr1	93081946	93082095	6.48346	2.83038	18.5601	8.24435	0.936641	2.48666	18.5834	9.21374	1.4957	0.23714	3.00253	0.0195988	Kif1a,Kif1a,Kif1a,Kif1a,Kif1a,Kif1a,Kif1a	Intron,Intron,Intron,Intron,Intron,Intron,Promoter
chr1	93083737	93083867	3.60192	5.66076	10.9986	8.75962	3.74657	0	15.2479	17.8516	1.10215	0.415878	3.19596	0.0100793	Kif1a,Kif1a,Kif1a,Kif1a,Kif1a	Intron,Intron,Intron,Intron,Intron
chr1	93118893	93119323	8.64462	2.83038	27.4965	54.1035	3.74657	8.28886	31.9254	38.0067	2.79435	0.000841279	2.52069	0.000725217	Intergenic	Intergenic
chr1	93125272	93125529	7.92423	5.66076	20.6223	28.3399	3.74657	4.14443	20.0129	35.1274	1.84175	0.045929	2.79882	0.00145077	Intergenic	Intergenic
chr1	93165378	93166265	22.3319	19.8127	108.611	109.238	14.9863	14.0911	130.084	120.354	2.36527	5.58389e-08	3.10856	6.64856e-14	Intergenic	Intergenic
chr1	93166594	93167110	12.9669	19.8127	124.421	126.757	2.80992	8.28886	112.454	142.237	2.95742	2.05495e-11	4.48675	2.16176e-16	Intergenic	Intergenic
chr1	93235488	93236517	85.0054	57.5511	131.983	206.624	132.066	86.2042	168.204	197.52	1.2438	0.000714568	0.748007	0.00858787	Intergenic,Sned1,Sned1,Sned1,Sned1,Sned1,Sned1,Sned1	Intergenic,Promoter,Promoter,Promoter,Promoter,Promoter,Promoter,Promoter
chr1	93283640	93284244	51.1473	79.2507	4.12447	13.9123	49.642	63.8243	10.9595	13.2447	-2.81452	1.73342e-05	-2.23513	2.03626e-05	Mir6901	Promoter
chr1	93284368	93284626	30.9765	21.6996	5.49929	4.12217	10.3031	12.4333	3.81198	5.75859	-2.46719	0.00683712	-1.25737	0.243573	Mir6901	Promoter
chr1	93286275	93286469	19.4504	24.53	2.06223	2.57636	23.416	21.551	5.24148	1.15172	-3.23196	0.00262504	-2.77891	0.00282253	Mir6901	Promoter
chr1	93305503	93306231	50.4269	69.8161	149.168	145.822	154.546	128.477	160.58	141.661	1.30259	0.000199244	0.0978941	0.740016	Mterf4,Gm28535,Gm28535,Mterf4,Mterf4,Intergenic	Promoter,Promoter,Promoter,Intron,Exon,Intergenic
chr1	93326590	93326836	28.095	33.9646	10.9986	1.54581	18.7328	25.6955	8.10046	0.575859	-2.34656	0.0140694	-2.32444	0.0196828	Pask,Pask,Pask,Pask,Pask,Pask	Intron,Intron,Intron,Intron,Intron,Intron
chr1	93342370	93344420	399.813	319.833	1235.97	1482.44	888.873	774.18	1286.07	1363.63	1.91415	1.24056e-33	0.673057	2.41176e-12	Pask,Pask,Pask,Pask,Pask,Pask,Pask,Pask,Pask,Pask,Pask,Pask,Pask,Pask,Ppp1r7,Pask,Pask,Pask,Pask,Intergenic	Intron,Intron,Intron,Intron,Intron,Intron,Promoter,Promoter,Promoter,Promoter,Promoter,Promoter,Exon,Exon,Promoter,Exon,Exon,Exon,Exon,Intergenic
chr1	93387624	93387782	5.76308	4.7173	0.687411	1.03054	23.416	12.4333	5.71798	3.45515	-2.59548	0.219435	-1.95133	0.0379074	Ano7	Promoter
chr1	93388972	93389582	57.6308	76.4203	8.93635	12.3665	125.51	155.002	11.9124	5.18273	-2.63878	3.70189e-06	-4.00802	9.57626e-21	Ano7	Promoter
chr1	93391249	93392092	74.1996	79.2507	14.4356	23.1872	138.623	170.751	28.1134	25.9136	-2.01415	7.64325e-05	-2.51689	1.00992e-14	Intergenic	Intergenic
chr1	93444451	93446383	147.679	190.579	512.121	561.131	369.973	320.779	496.034	445.139	1.67251	1.59939e-16	0.448894	0.00349713	Hdlbp,Hdlbp,Hdlbp,Hdlbp,Hdlbp,Hdlbp,Hdlbp,Hdlbp,Hdlbp,Hdlbp,Hdlbp,Hdlbp	Intron,Intron,Intron,Intron,Intron,Intron,Promoter,Promoter,Promoter,Exon,Exon,Exon
chr1	93477832	93479971	832.044	857.606	2019.61	2312.54	1200.77	1136.4	2214.29	1995.93	1.3594	2.25277e-29	0.850348	1.51397e-25	Hdlbp,Hdlbp,Hdlbp,Hdlbp,Sept2,Sept2,Sept2,Sept2,Hdlbp,Sept2,Sept2,Hdlbp,Intergenic	Intron,Intron,Promoter,Promoter,Promoter,Promoter,Promoter,Promoter,Exon,Promoter,Promoter,Exon,Intergenic
chr1	93506975	93507546	16.5688	16.0388	69.4285	73.6838	24.3527	31.4977	37.6433	54.7066	2.13323	5.49641e-05	0.719285	0.183906	Intergenic	Intergenic
chr1	93511232	93512791	297.519	285.869	845.516	1027.45	476.75	542.092	813.858	875.881	1.68314	1.00587e-24	0.727677	2.25885e-10	Intergenic,Farp2	Intergenic,Promoter
chr1	93525566	93525886	15.1281	9.4346	49.4936	28.3399	8.42977	10.7755	34.7843	27.0654	1.64575	0.0266624	1.68481	0.017058	Farp2	Promoter
chr1	93567090	93567395	9.365	8.49114	35.7454	44.3134	3.74657	0.828886	14.7714	17.8516	2.16303	0.00295149	2.86513	0.0133601	Gm41920	Promoter
chr1	93634543	93636546	430.07	415.123	1230.47	1407.72	770.856	736.88	1280.35	1242.7	1.64228	1.12063e-31	0.743642	1.59107e-16	Stk25,Stk25,Stk25,Stk25,Stk25,Stk25,Stk25,Stk25,Stk25,Stk25,Stk25,Stk25,Stk25	Intron,Intron,Intron,Promoter,Promoter,Exon,Exon,Exon,Intron,Intron,Intron,Exon,Exon
chr1	93667768	93668264	27.3746	25.4734	39.1824	31.9468	63.6916	94.4931	22.3954	20.7309	0.424448	0.522865	-1.87609	2.28349e-05	Intergenic	Intergenic
chr1	93680209	93680521	28.095	43.3992	19.2475	26.2788	32.7824	33.9843	17.1539	7.48616	-0.639641	0.353943	-1.42573	0.0352605	Intergenic	Intergenic
[truncated: 62,274 more rows]
