# Supplementary material for: Tet2 Inactivation Enhances the Antitumor Activity of Tumor-Infiltrating Lymphocytes
Source: Oxford University Press journal article supplement (doi:10.1158/0008-5472.can-20-3213), 2021-02-15
Supplement: 00085472can203213-sup-252239_2_supp_6901349_qp2jj9.xlsx [file 00085472can203213-sup-252239_2_supp_6901349_qp2jj9.xlsx]

## Sheet: Table S1 NGS data information
single cell RNA-seq
Samples	Cells Sequenced	Mean UMI-count Per Cell	Median Genes Per Cell
WT_CTL	4670	6781	1849
WT_PDL1	3174	7241	1730
TET2KO_CTL	4434	6017	1608
TET2KO_PDL1	2616	8855	2131
RNA-seq
Samples	Total	Unique Mapped Reads	Unique Map Ratio	Exon Mapped Reads	Exon Map Ratio
WT_D0-1	45000689	38853799	0.863405	33539605	0.745313
WT_D0-2	13690090	10946284	0.799577	9524447	0.695718
WT_D3-1	18554751	14555772	0.784477	12271254	0.661354
WT_D3-2	60927643	50338711	0.826205	42153101	0.691855
TET2KO_D0-1	15182725	12071598	0.795088	10595511	0.697866
TET2KO_D0-2	16148017	12902504	0.799015	11328878	0.701565
TET2KO_D3-1	19511130	15828675	0.811264	13813246	0.707968
TET2KO_D3-2	18880043	15347771	0.81291	13391852	0.709313
ATAC-seq
Samples	Total (PE)	Mapping Reads	Map Ratio	Unique Mapped Reads (remove chrM)	Unique Map Ratio	Peaks (Genrich)
WT_D0-1	38881563	47213011	0.607139	40330355	0.518631	39917
WT_D0-2	30195477	36387889	0.602539	30733707	0.508912
WT_D3-1	28075088	39112876	0.696576	35853491	0.638529	81361
WT_D3-2	39656765	55890888	0.704683	50785839	0.640317
TET2KO_D0-1	30302888	36462661	0.601637	29863446	0.492749	68318
TET2KO_D0-2	34732687	41750989	0.601033	33850196	0.487296
TET2KO_D3-1	41595565	60412849	0.726193	57463948	0.690746	71319
TET2KO_D3-2	34698389	49744549	0.716814	47197753	0.680114
