# Supplementary material for: Tet2 Inactivation Enhances the Antitumor Activity of Tumor-Infiltrating Lymphocytes
Source: Oxford University Press journal article supplement (doi:10.1158/0008-5472.can-20-3213), 2021-02-15
Supplement: 00085472can203213-sup-252239_2_supp_6901351_qk2jj9.xlsx [file 00085472can203213-sup-252239_2_supp_6901351_qk2jj9.xlsx]

## Sheet: D0_vs_D3
ID	D0-WT-1	D0-WT-2	D3-WT-1	D3-WT-2	D0-TET2KO-1	D0-TET2KO-2	D3-TET2KO-1	D3-TET2KO-2	Log2FC(WT D0_vs_D3)	P-value(WT D0_vs_D3)	Log2FC(TET2KO D0_vs_D3)	P-value(TET2KO D0_vs_D3)
0610040J01Rik	0	0	19.9184	12.1773	0	0	23.6018	16.6359	7.06358	5.61128e-05	6.76244	4.07184e-05
1110002J07Rik	3.84033	2.39269	43.3519	57.4075	4.26403	4.0044	35.4026	29.9445	3.91384	2.35732e-09	3.01916	4.09667e-05
1110002L01Rik	281.042	228.502	73.8154	109.248	224.928	187.206	92.2614	95.3789	-1.44406	1.15983e-07	-1.09906	2.33334e-07
1110008L16Rik	297.102	303.872	105.451	73.0641	256.908	277.305	106.208	84.2883	-1.78298	2.19232e-13	-1.45143	1.51171e-13
1110012L19Rik	248.225	232.091	120.682	107.856	166.297	184.202	96.5526	114.233	-1.08231	1.2534e-07	-0.70018	0.00120931
1110019D14Rik	27.9297	16.7489	50.382	38.9675	15.9901	12.0132	45.0579	38.817	0.937964	0.0647073	1.62166	0.00155352
1110032F04Rik	251.018	235.68	22.2618	23.3109	214.268	192.211	46.1307	25.5083	-3.40134	1.71474e-36	-2.46417	3.34964e-19
1110038B12Rik	885.021	897.26	404.227	427.947	857.07	876.963	375.482	378.188	-1.08402	3.2014e-21	-1.16719	1.68826e-30
1110038F14Rik	328.173	302.676	766.274	807.184	259.04	260.286	800.314	750.832	1.32	6.94947e-25	1.61395	1.15708e-45
1110046J04Rik	3.14209	3.58904	19.9184	14.2649	11.7261	9.0099	16.0921	15.5268	2.35717	0.00675821	0.646305	0.385381
1190002N15Rik	664.027	738.146	251.91	280.079	942.351	929.02	329.352	347.135	-1.37406	1.38448e-21	-1.4331	1.83805e-44
1190007I07Rik	156.755	167.489	77.3304	79.3267	153.505	135.148	70.8053	56.5619	-1.03299	1.33014e-05	-1.14302	8.79365e-06
1500009L16Rik	75.7592	68.1917	14.0601	27.486	392.291	379.417	27.893	24.3993	-1.71256	0.000195522	-3.84673	2.20744e-51
1500015A07Rik	13.9648	11.9635	37.4936	35.8362	14.9241	20.022	34.3298	32.1627	1.47952	0.00463186	0.960602	0.0679371
1600002K03Rik	259.397	289.516	94.9056	86.2852	182.287	171.188	74.0237	89.8336	-1.59769	1.35886e-14	-1.07484	2.20978e-06
1600010M07Rik	1.04736	0	48.0386	35.4883	0	0	31.1114	34.3808	5.74233	5.06844e-08	7.46382	2.25371e-06
1600014C10Rik	812.404	813.516	1196.28	1277.93	593.766	581.639	1600.63	1771.16	0.617218	7.82557e-10	1.55533	3.18638e-84
1700001L05Rik	25.4858	45.4612	25.7768	19.4838	111.931	115.126	40.7667	46.5804	-0.627676	0.270978	-1.34415	5.49532e-06
1700003F12Rik	0.698241	0	64.442	54.6241	0	0	21.4561	24.3993	6.80796	2.57066e-09	6.9495	1.87677e-05
1700007K13Rik	50.9716	45.4612	3.51502	3.82717	5.33004	2.0022	3.21842	2.21811	-3.69164	3.3957e-09	-0.388317	0.807501
1700016P03Rik	10.4736	9.57077	45.6953	63.3222	8.52806	3.0033	64.3684	54.3438	2.4518	1.56059e-06	3.41568	8.67299e-09
1700019D03Rik	0.349121	0	353.845	340.618	3.19802	2.0022	205.979	178.558	10.1987	1.4931e-15	6.25398	1.14601e-19
1700021F05Rik	120.447	132.794	288.232	250.157	119.393	110.121	180.232	168.577	1.09852	6.2797e-08	0.640066	0.00218825
1700022I11Rik	9.77538	14.3562	11.7167	20.5275	9.59407	18.0198	34.3298	33.2717	0.508202	0.506303	1.32055	0.0179485
1700025G04Rik	264.284	308.657	223.79	217.801	778.186	660.726	149.12	147.505	-0.358585	0.0517085	-2.24224	4.5294e-58
1700030J22Rik	6.98241	10.7671	45.6953	35.1403	13.8581	7.0077	46.1307	56.5619	2.26058	0.000100859	2.34244	8.37852e-06
1700030K09Rik	143.489	108.868	39.8369	41.7509	118.327	149.164	39.6939	54.3438	-1.63103	2.78006e-07	-1.47636	2.85115e-07
1700034H15Rik	3.84033	4.78539	16.4034	23.3109	1.06601	2.0022	18.2377	27.7264	2.27618	0.00449161	3.92782	0.000261197
1700037C18Rik	30.7226	31.105	72.6438	60.8867	34.1122	32.0352	60.0772	52.1257	1.1067	0.0032731	0.798707	0.0403531
1700047I17Rik2	14.6631	9.57077	29.2918	27.486	24.5182	23.0253	24.6746	47.6895	1.17451	0.049129	0.639069	0.20836
1700056E22Rik	5.23681	5.98173	23.4335	27.8339	10.6601	9.0099	27.893	22.1811	2.23786	0.00115568	1.38594	0.0321925
1700066B19Rik	32.4682	25.1233	0	3.82717	45.8383	26.0286	2.14561	7.7634	-3.54078	0.00015973	-2.8303	9.84016e-05
1700096K18Rik	15.3613	20.3379	26.9485	25.3985	5.33004	15.0165	33.257	35.4898	0.589394	0.297462	1.78059	0.00315991
1700097N02Rik	33.1665	31.105	5.85837	0.347924	20.2541	27.0297	3.21842	4.43623	-3.72813	0.000479428	-2.59585	0.00178194
1700101I11Rik	5.23681	4.78539	28.1202	25.7464	5.33004	2.0022	16.0921	24.3993	2.40892	0.000441945	2.5117	0.00412534
1700109H08Rik	53.7646	63.4064	16.4034	18.0921	34.1122	30.033	13.9465	11.0906	-1.72837	6.69871e-05	-1.31992	0.0214222
1810013L24Rik	742.23	696.274	1925.06	1917.06	600.162	583.641	1941.78	1913.12	1.41904	4.98787e-52	1.7388	3.45105e-123
1810034E14Rik	67.7294	55.0319	51.5536	44.8822	54.3664	96.1056	26.8202	27.7264	-0.372554	0.318004	-1.43179	0.000340149
1810041H14Rik	21.2964	32.3014	3.51502	5.21886	13.8581	20.022	3.21842	6.65434	-2.50987	0.00072122	-1.7505	0.0433496
1810043G02Rik	101.594	92.1187	273	261.291	74.6205	81.0891	213.489	187.431	1.45448	4.74794e-13	1.39918	1.69651e-10
1810044D09Rik	32.1191	32.3014	11.7167	12.8732	18.1221	27.0297	10.7281	13.3087	-1.36685	0.012458	-0.878105	0.180053
2010016I18Rik	390.666	422.31	3.51502	1.3917	189.749	197.217	9.65526	5.54529	-7.73028	4.25773e-40	-4.62928	2.00117e-25
2010110K18Rik	19.2016	13.1598	11.7167	6.95848	42.6403	45.0495	8.58246	11.0906	-0.875867	0.261904	-2.1233	0.000122634
2010204K13Rik	55.8593	34.694	18.7468	14.2649	43.7063	39.0429	19.3105	4.43623	-1.51056	0.00446219	-1.75748	0.00254953
2010300C02Rik	31.4209	22.7306	5.85837	4.87094	108.733	101.111	8.58246	9.98151	-2.38475	0.000658278	-3.46468	3.10799e-14
2210011C24Rik	5.58593	3.58904	5.85837	3.13132	27.7162	32.0352	2.14561	1.10906	-0.132248	0.91803	-4.15743	5.04609e-05
2210408F21Rik	11.1719	11.9635	107.794	103.333	7.46205	9.0099	84.7518	66.5434	3.21196	1.77381e-16	3.23216	1.13753e-10
2210408I21Rik	27.9297	41.8721	80.8455	61.5826	29.8482	43.0473	91.1886	74.3068	1.06515	0.00995922	1.21513	0.00044348
2310015A10Rik	33.1665	35.8904	113.652	117.946	28.7822	25.0275	107.281	92.0517	1.76952	6.46248e-09	1.92674	1.81991e-08
2310022A10Rik	716.046	644.831	1462.25	1467.2	527.674	540.594	2118.79	2000.74	1.10578	1.78845e-25	1.98225	2.3487e-151
2310022B05Rik	144.536	147.151	678.399	665.231	294.218	291.32	514.947	502.403	2.21332	3.44113e-54	0.832326	1.36934e-11
2310031A07Rik	7.33153	11.9635	281.202	276.948	10.6601	15.0165	469.889	517.93	5.02271	1.84238e-47	5.29349	9.83504e-62
2310040G24Rik	10.4736	5.98173	25.7768	29.5736	8.52806	13.0143	53.6403	32.1627	1.68387	0.00997815	2.02566	0.000272902
2310058D17Rik	42.9418	32.3014	10.5451	20.5275	8.52806	28.0308	19.3105	17.7449	-1.21526	0.03692	0.0480478	0.945935
2410002F23Rik	766.669	722.593	255.425	273.468	313.406	372.409	219.925	216.266	-1.48078	4.38844e-29	-0.618803	5.69248e-05
2410004B18Rik	145.234	179.452	322.21	321.134	143.911	157.173	288.585	275.046	1.01638	1.25236e-07	0.939021	3.33087e-08
2410006H16Rik	1532.64	1695.22	1092	1035.07	1991.3	1957.15	934.415	923.845	-0.592519	1.11117e-08	-1.05202	1.93667e-55
2500002B13Rik	34.2138	43.0685	24.6051	16.0045	97.0067	69.0759	16.0921	12.1996	-0.95404	0.0664313	-2.51447	7.95007e-09
2500004C02Rik	27.5805	33.4977	12.8884	10.7856	22.3862	31.0341	16.0921	16.6359	-1.37121	0.0165747	-0.674051	0.245919
2510002D24Rik	151.867	160.31	25.7768	31.3132	141.779	157.173	47.2035	32.1627	-2.40333	3.95043e-16	-1.87602	5.19243e-11
2510009E07Rik	35.6103	46.6575	422.974	432.818	45.8383	60.066	314.332	297.227	3.45082	2.79762e-55	2.5611	6.10787e-33
2510017J16Rik	7.33153	8.37443	21.0901	23.3109	3.19802	6.0066	12.8737	18.854	1.53673	0.0221573	1.81179	0.040344
2610001J05Rik	431.862	471.361	1333.36	1358.99	392.291	402.442	1052.42	1109.06	1.5942	1.61981e-49	1.4781	8.4872e-55
2610002M06Rik	277.9	320.621	821.343	861.112	253.71	303.333	856.1	861.737	1.51663	3.94609e-29	1.65777	1.1548e-49
2610020C07Rik	12.2192	8.37443	15.2318	6.95848	40.5083	26.0286	11.8009	8.87246	0.0172562	0.985715	-1.647	0.0063552
2610021A01Rik	406.726	452.219	119.511	104.725	492.496	465.511	120.154	140.85	-1.9431	2.05358e-26	-1.84167	5.76869e-33
2610035D17Rik	36.3085	34.694	93.7339	109.944	54.3664	59.0649	55.786	36.5989	1.53193	2.14205e-06	-0.259457	0.499267
2610044O15Rik8	224.485	218.931	128.884	80.7184	219.598	225.247	99.771	92.0517	-1.10811	0.000106131	-1.17804	5.77398e-09
2610203C22Rik	0.349121	0	11.7167	13.917	0	0	9.65526	8.87246	5.46545	0.000676451	5.64276	0.00213686
2610318N02Rik	101.594	90.9223	69.1287	82.458	98.0727	103.113	47.2035	39.9261	-0.32923	0.272281	-1.17142	0.00013944
2610507I01Rik	68.7768	51.4429	16.4034	16.7004	54.3664	50.055	15.0193	16.6359	-1.86854	3.20446e-05	-1.68701	0.000322986
2700038G22Rik	75.0609	78.9589	21.0901	29.5736	52.2344	50.055	22.5289	17.7449	-1.54558	6.14238e-05	-1.30782	0.00353861
2700046G09Rik	1.7456	5.98173	22.2618	16.0045	3.19802	1.0011	17.1649	8.87246	2.51399	0.00752973	2.68479	0.018218
2700049A03Rik	353.31	331.388	144.116	125.253	454.119	417.459	115.863	126.433	-1.35946	2.1403e-13	-1.81187	1.22331e-29
2700081O15Rik	122.89	100.493	48.0386	51.1448	98.0727	98.1078	60.0772	51.0166	-1.16979	0.000119925	-0.784313	0.00769071
2700097O09Rik	156.057	185.434	85.5322	67.4973	253.71	242.266	80.4605	72.0887	-1.16588	1.2242e-05	-1.66479	1.01558e-15
2810021J22Rik	126.382	78.9589	31.6352	34.4445	120.459	136.15	40.7667	35.4898	-1.64012	2.48835e-05	-1.71523	7.01745e-09
2810029C07Rik	35.6103	22.7306	18.7468	35.8362	9.59407	9.0099	24.6746	26.6174	-0.0757294	0.904806	1.49866	0.0203887
2810402E24Rik	46.0839	32.3014	74.9871	88.3727	41.5743	43.0473	77.2421	82.0702	1.03798	0.00506647	0.947273	0.00395979
2810403D21Rik	59.3505	53.8356	24.6051	19.4838	55.4324	46.0506	30.0386	21.0721	-1.39403	0.00102623	-0.951201	0.0283498
2810408A11Rik	22.6928	22.7306	18.7468	13.2211	46.9043	54.0594	12.8737	17.7449	-0.539557	0.377187	-1.68923	0.000445006
2810429I04Rik	6.63329	7.17808	28.1202	15.6566	22.3862	21.0231	4.29123	15.5268	1.64703	0.0276623	-1.10213	0.126634
2810455O05Rik	8.72802	9.57077	4.68669	11.1336	19.1881	20.022	2.14561	6.65434	-0.120107	0.90386	-2.12834	0.0127877
2900041M22Rik	17.1069	17.9452	12.8884	8.6981	31.9802	39.0429	7.50965	7.7634	-0.736598	0.298294	-2.18348	0.000465501
2900052L18Rik	40.1489	66.9954	3.51502	2.43547	7.46205	14.0154	4.29123	3.32717	-4.24302	2.29626e-09	-1.46188	0.163709
2900076A07Rik	34.2138	26.3196	25.7768	16.7004	43.7063	39.0429	27.893	9.98151	-0.568181	0.313376	-1.08659	0.0376601
2900089D17Rik	1.04736	0	21.0901	16.3524	0	1.0011	6.43684	18.854	4.63484	0.0001653	4.64918	0.0082108
2900093K20Rik	6.28417	3.58904	18.7468	18.0921	1.06601	4.0044	12.8737	8.87246	1.81451	0.0224245	2.1224	0.0613838
2900097C17Rik	1658.32	915.205	1403.66	2383.28	730.215	672.739	1506.22	1544.92	0.564224	0.352665	1.15676	2.40011e-51
3110009E18Rik	21.6455	34.694	7.03004	12.8732	24.5182	19.0209	10.7281	16.6359	-1.39331	0.0400265	-0.635615	0.326544
3300005D01Rik	0.698241	2.39269	10.5451	8.6981	5.33004	10.011	17.1649	15.5268	2.91064	0.0235893	1.12098	0.15429
3830403N18Rik	28.977	37.0867	112.481	122.469	4.26403	6.0066	90.1158	66.5434	1.8843	4.57586e-09	3.96101	7.96893e-12
3830406C13Rik	206.33	235.68	497.961	527.105	206.806	229.252	514.947	550.092	1.23973	1.21484e-15	1.32202	8.32126e-24
4732491K20Rik	1.39648	5.98173	12.8884	23.3109	4.26403	4.0044	15.0193	9.98151	2.54846	0.0131235	1.63369	0.0905685
4833403J16Rik	81.6942	71.7808	10.5451	15.3087	73.5545	76.0836	22.5289	22.1811	-2.50046	8.73626e-09	-1.70776	1.16481e-05
4833407H14Rik	17.8052	20.3379	157.004	163.176	44.7723	48.0528	143.756	159.704	3.11117	5.03078e-23	1.74275	5.37205e-11
4833418N02Rik	16.0595	10.7671	33.9785	46.6218	7.46205	6.0066	37.5482	35.4898	1.55888	0.00434877	2.47748	8.13564e-05
4833420G17Rik	577.795	616.118	231.991	251.549	761.13	788.866	303.604	273.937	-1.28285	1.55822e-19	-1.38867	6.4884e-35
4833445I07Rik	27.9297	17.9452	7.03004	10.0898	17.0561	11.0121	7.50965	8.87246	-1.3959	0.046754	-0.739846	0.36836
4921525O09Rik	26.184	27.516	0	0.347924	105.535	85.0935	2.14561	0	-6.51224	6.5335e-06	-6.41425	3.98296e-09
4921531C22Rik	9.07714	11.9635	52.7253	47.3177	8.52806	6.0066	40.7667	49.9076	2.30524	4.93723e-06	2.68076	4.8381e-06
4921536K21Rik	1.04736	1.19635	33.9785	44.8822	1.06601	2.0022	34.3298	39.9261	5.20134	2.80642e-08	4.61974	3.21751e-06
4930402H24Rik	114.512	138.776	569.433	586.6	110.865	121.133	546.059	536.784	2.22894	5.54213e-40	2.25658	3.27306e-51
4930417O13Rik	156.406	198.594	4.68669	16.3524	142.845	146.161	27.893	21.0721	-3.86884	3.07934e-17	-2.52395	3.12497e-15
4930430E12Rik	6.63329	5.98173	1161.13	1275.14	2.13202	0	1080.32	1123.47	7.56526	9.54276e-120	10.0944	2.12433e-22
4930430F08Rik	269.521	232.091	107.794	106.465	234.522	205.225	107.281	86.5065	-1.23066	4.41734e-09	-1.14492	3.99037e-08
4930455G09Rik	0.349121	0	124.197	111.684	0	1.0011	97.6254	92.0517	8.63914	4.19829e-11	7.55659	4.57725e-07
4930481A15Rik	25.8349	20.3379	8.20171	9.04603	26.6502	28.0308	8.58246	8.87246	-1.41646	0.0321177	-1.61279	0.0130372
4930509E16Rik	36.6577	31.105	14.0601	13.917	22.3862	19.0209	6.43684	2.21811	-1.28305	0.0157749	-2.215	0.00856733
4930513N10Rik	42.9418	46.6575	7.03004	17.3962	36.2443	27.0297	11.8009	17.7449	-1.75931	0.00278559	-1.06418	0.0598803
4930520O04Rik	56.2084	52.6392	1.17167	1.73962	21.3202	22.0242	1.07281	1.10906	-5.0973	4.1358e-11	-4.27756	0.000589945
4930522L14Rik	85.1854	69.3881	19.9184	20.8754	116.195	105.115	27.893	36.5989	-1.91984	1.00859e-06	-1.74509	6.51876e-08
4930539E08Rik	459.792	478.539	32.8069	23.6588	99.1387	114.125	18.2377	18.854	-4.13252	1.74083e-68	-2.48936	2.35326e-11
4930558J18Rik	10.4736	10.7671	5.85837	8.00226	34.1122	27.0297	15.0193	9.98151	-0.5681	0.52113	-1.25118	0.0334843
4930579G24Rik	242.639	258.411	178.094	128.384	366.707	366.402	133.028	140.85	-0.72227	0.00231351	-1.38575	8.58917e-18
4930581F22Rik	86.5819	69.3881	17.5751	21.2234	63.9605	75.0825	24.6746	22.1811	-1.98264	8.34005e-07	-1.53432	0.000107116
4930599N23Rik	0.349121	0	30.4635	21.5713	0	0	37.5482	24.3993	6.45469	9.74559e-06	7.38518	3.36564e-06
4931406C07Rik	166.88	200.986	1115.43	1148.5	214.268	206.227	888.284	851.756	2.65848	8.29253e-81	2.08478	1.18722e-72
4931406P16Rik	410.217	394.794	1075.6	964.446	423.205	369.406	1106.06	1226.62	1.34097	2.398e-27	1.59352	5.58749e-59
4931414P19Rik	63.54	59.8173	35.1502	24.7026	75.6866	79.0869	34.3298	42.1442	-1.08364	0.00801255	-0.983515	0.00421921
4931428F04Rik	7.33153	22.7306	53.897	46.9698	95.9407	110.121	38.6211	44.3623	1.86379	0.00368106	-1.2788	3.70122e-05
4933404O12Rik	175.259	156.721	11.7167	12.1773	284.624	284.312	22.5289	16.6359	-3.78459	1.2577e-27	-3.82248	5.05118e-38
4933406I18Rik	113.115	71.7808	0	0	25.5842	14.0154	2.14561	2.21811	-9.62842	3.65002e-10	-3.14432	0.00209206
4933406J09Rik	0.698241	0	32.8069	48.0135	0	0	74.0237	69.8706	6.28813	1.92597e-07	8.59994	1.46425e-08
4933407K13Rik	48.1786	35.8904	7.03004	8.35018	34.1122	31.0341	10.7281	12.1996	-2.42809	2.19255e-05	-1.47176	0.0112848
4933412E12Rik	78.5521	82.5479	214.416	216.757	137.515	157.173	230.653	240.665	1.43629	2.9865e-11	0.711163	8.84904e-05
4933421O10Rik	10.8227	19.1415	53.897	58.1033	8.52806	19.0209	60.0772	68.7615	2.00565	5.38138e-05	2.25024	1.34086e-06
4933427D14Rik	250.319	267.982	86.7038	89.0686	301.68	294.323	86.8974	99.8151	-1.54348	3.6613e-14	-1.64021	2.86409e-18
4933431E20Rik	2.44384	0	70.3004	53.9282	2.13202	4.0044	42.9123	57.671	5.13688	3.70673e-11	4.05781	4.5317e-08
4933439C10Rik	51.3207	47.8539	17.5751	10.0898	52.2344	39.0429	10.7281	18.854	-1.92499	0.00019868	-1.59247	0.00181012
5031425F14Rik	3.14209	2.39269	2.34335	7.30641	0	0	2.14561	11.0906	0.852918	0.548338	5.15346	0.01117
5031439G07Rik	134.761	138.776	5499.84	5435.27	180.155	143.157	4252.61	4229.94	5.33624	0	4.75305	0
5033406O09Rik	7.68065	3.58904	37.4936	52.1886	5.33004	5.0055	37.5482	37.7079	2.87611	5.08699e-06	2.90029	1.39856e-05
5430403G16Rik	81.6942	95.7077	4.68669	5.56679	102.337	113.124	10.7281	13.3087	-4.04852	3.92226e-16	-3.13144	8.42931e-14
5430427O19Rik	127.429	163.899	412.429	405.68	88.4786	107.118	647.975	580.037	1.52511	2.05402e-15	2.68306	2.33946e-66
5730409E04Rik	46.0839	62.21	134.742	128.036	17.0561	33.0363	86.8974	79.8521	1.32233	8.05381e-06	1.76314	3.4608e-06
5830408C22Rik	44.3383	70.5844	17.5751	21.5713	127.921	124.136	24.6746	22.1811	-1.49341	0.00193988	-2.39129	8.02841e-13
5830411N06Rik	119.05	114.849	2.34335	3.82717	36.2443	26.0286	2.14561	2.21811	-5.08951	6.04725e-22	-3.79864	4.00663e-05
5830418P13Rik	64.2382	63.4064	3.51502	2.78339	18.1221	18.0198	1.07281	0	-4.40653	9.04781e-13	-5.01621	0.00256741
5830428M24Rik	23.3911	34.694	5.85837	2.78339	28.7822	56.0616	4.29123	11.0906	-2.87548	0.000187408	-2.43777	0.00011625
5830432E09Rik	4.53857	4.78539	53.897	46.6218	18.1221	17.0187	83.6789	73.1978	3.44316	4.97696e-09	2.1949	5.48014e-08
5830468F06Rik	34.5629	40.6758	3.51502	2.08754	12.7921	17.0187	1.07281	1.10906	-3.87864	1.76408e-07	-3.73869	0.00488238
6030458C11Rik	679.389	707.041	350.33	286.689	453.053	444.488	268.202	273.937	-1.12838	1.94693e-13	-0.692173	1.12462e-07
6330403L08Rik	5.93505	9.57077	21.0901	12.5253	0	2.0022	15.0193	5.54529	1.15116	0.152619	3.36673	0.0226119
6330562C20Rik	6.98241	9.57077	25.7768	19.4838	8.52806	11.0121	12.8737	19.963	1.48844	0.0297497	0.779844	0.299051
6430548M08Rik	13.6157	9.57077	222.618	194.49	26.6502	26.0286	187.741	218.484	4.07735	2.3364e-33	2.98195	1.58808e-25
6430571L13Rik	292.214	324.21	4.68669	2.08754	20.2541	24.0264	4.29123	4.43623	-6.80561	2.32067e-40	-2.30905	0.00453063
6720489N17Rik	86.931	111.26	30.4635	42.0988	107.667	123.135	48.2763	72.0887	-1.389	0.000112402	-0.907188	0.00151713
8030453O22Rik	0	0	22.2618	6.95848	0	0	22.5289	6.65434	6.91362	0.000213196	6.30103	0.000301949
8430429K09Rik	59.0014	69.3881	15.2318	29.9215	41.5743	54.0594	17.1649	42.1442	-1.42118	0.00287197	-0.659665	0.159204
9130008F23Rik	0	3.58904	28.1202	27.1381	5.33004	2.0022	20.3833	16.6359	4.12959	0.0594206	2.38425	0.00750894
9130019O22Rik	61.4452	68.1917	38.6652	20.8754	74.6205	69.0759	31.1114	37.7079	-1.17083	0.010817	-1.02769	0.00429102
9130023H24Rik	96.3573	93.315	38.6652	42.7947	74.6205	68.0748	40.7667	46.5804	-1.19993	0.000137854	-0.673108	0.0498091
9130221H12Rik	111.02	113.653	50.382	47.3177	155.637	159.175	43.9851	45.4713	-1.20065	2.95981e-05	-1.78048	2.50007e-11
9130230L23Rik	1.39648	2.39269	19.9184	18.44	3.19802	2.0022	11.8009	15.5268	3.4899	0.000281842	2.43431	0.0196896
9230114K14Rik	278.598	296.694	21.0901	18.44	126.855	125.137	25.7474	22.1811	-3.88893	9.05713e-47	-2.35801	1.25577e-12
9330102E08Rik	0	1.19635	50.382	39.3154	0	0	34.3298	28.8355	7.19379	1.95699e-07	7.4125	2.82242e-06
9330159F19Rik	0	0	39.8369	43.1426	0	0	21.4561	31.0536	8.45915	7.7135e-08	7.14426	8.89559e-06
9330159M07Rik	2.44384	5.98173	17.5751	21.5713	4.26403	8.0088	21.4561	13.3087	2.40387	0.00533069	1.5324	0.0600463
9330175E14Rik	99.4994	89.726	257.768	225.455	143.911	130.143	342.225	326.063	1.33868	7.54338e-10	1.32249	1.22169e-15
9330182L06Rik	1.39648	3.58904	50.382	52.1886	6.39605	6.0066	48.2763	38.817	4.67457	4.00734e-10	2.84878	3.74965e-06
9330188P03Rik	0	0	72.6438	75.4995	0	0	49.3491	55.4529	9.29335	1.19437e-09	8.14203	1.17742e-07
9430015G10Rik	258	229.699	42.1802	59.1471	401.885	365.401	85.8246	78.7431	-2.21627	3.19516e-17	-2.18473	4.93789e-33
9430038I01Rik	44.6874	49.0502	193.326	172.918	49.0364	66.0726	124.446	176.34	1.98287	1.72853e-14	1.41661	1.99811e-07
9530053A07Rik	45.0366	61.0137	0	2.08754	8.52806	15.0165	0	1.10906	-5.12282	8.68206e-10	-4.39747	0.0127878
9530068E07Rik	1309.9	1489.45	3393.17	3300.41	1346.37	1243.37	3140.11	3125.32	1.27148	1.98744e-39	1.31048	4.93158e-106
9530077C05Rik	28.6279	21.5342	1.17167	4.52301	62.8945	57.0627	1.07281	2.21811	-2.92609	0.000603028	-5.15997	3.95052e-08
9530082P21Rik	4.53857	3.58904	249.566	246.678	26.6502	40.044	382.992	388.17	5.85828	1.48286e-41	3.55942	3.90007e-53
9930012K11Rik	52.019	56.2283	17.5751	14.2649	50.1024	56.0616	24.6746	18.854	-1.78744	7.47492e-05	-1.25011	0.00426955
9930014A18Rik	62.1435	61.0137	30.4635	21.9192	35.1783	39.0429	21.4561	23.2902	-1.27155	0.00199845	-0.696101	0.151408
9930022D16Rik	1.04736	0	24.6051	25.0505	1.06601	3.0033	67.5868	48.7985	5.03238	1.09965e-05	4.85533	8.65462e-09
9930111J21Rik1	43.9892	31.105	108.966	97.4188	99.1387	92.1012	275.711	248.429	1.41543	3.49998e-05	1.49099	1.11235e-14
9930111J21Rik2	129.873	128.009	840.09	1007.59	278.228	344.378	1005.22	890.573	2.85202	1.85931e-69	1.63976	3.05356e-47
A130010J15Rik	252.414	233.288	106.622	91.852	280.36	261.287	80.4605	119.778	-1.30746	9.75609e-10	-1.40258	3.583e-12
A130077B15Rik	0.349121	0	29.2918	33.0528	0	0	38.6211	31.0536	6.73618	2.12412e-06	7.55414	1.56339e-06
A230028O05Rik	0	0	12.8884	11.8294	0	0	18.2377	24.3993	6.70411	0.000205368	6.84401	2.91663e-05
A230050P20Rik	228.674	210.557	48.0386	41.7509	289.954	255.28	57.9316	74.3068	-2.31327	1.35335e-20	-2.00975	5.95585e-21
A330023F24Rik	13.6157	22.7306	4.68669	4.52301	11.7261	2.0022	8.58246	7.7634	-1.94386	0.0187458	0.297474	0.78568
A330040F15Rik	0	0	42.1802	32.3569	0	0	45.0579	46.5804	8.28839	1.92405e-07	7.94866	2.76381e-07
A430033K04Rik	93.2152	90.9223	28.1202	20.5275	130.053	133.146	19.3105	26.6174	-1.96669	9.22019e-08	-2.48632	9.90376e-14
A430035B10Rik	3.84033	5.98173	15.2318	15.6566	15.9901	7.0077	9.65526	14.4177	1.74063	0.0377826	0.10498	0.901561
A430046D13Rik	44.6874	64.6027	11.7167	8.35018	78.8846	92.1012	18.2377	5.54529	-2.4801	3.09013e-06	-2.80269	1.2241e-09
A430072P03Rik	38.0541	38.2831	0	0	21.3202	10.011	0	2.21811	-8.33586	1.39478e-07	-3.80132	0.00460267
A430078G23Rik	68.7768	41.8721	3.51502	1.3917	164.165	151.166	4.29123	6.65434	-4.78333	9.3943e-10	-4.8176	1.89938e-20
A430093F15Rik	111.369	105.278	26.9485	9.04603	151.373	152.167	31.1114	38.817	-2.70719	3.09967e-07	-2.08453	4.57735e-13
A4galt	0	1.19635	23.4335	31.6611	0	0	2.14561	4.43623	6.48638	8.40141e-06	4.14727	0.0850866
A530010L16Rik	0	0	5.85837	9.74188	0	0	3.21842	2.21811	6.06531	0.00260008	3.87468	0.129743
A530013C23Rik	0	0	9.37339	12.5253	0	0	4.29123	16.6359	6.54631	0.000420069	5.81483	0.00158197
A530017D24Rik	62.4926	80.1552	179.266	170.831	86.3466	68.0748	106.208	108.688	1.33238	2.0435e-07	0.513897	0.0566778
A530032D15Rik	0.349121	5.98173	215.588	281.819	2.13202	2.0022	259.619	271.719	6.47457	2.36528e-05	7.04224	8.68929e-21
A530040E14Rik	0.698241	2.39269	120.682	107.161	1.06601	4.0044	168.431	158.595	6.67933	1.48653e-16	6.02186	4.76269e-18
A530041M06Rik	3.14209	7.17808	12.8884	17.7441	3.19802	3.0033	12.8737	12.1996	1.72392	0.0543882	2.05164	0.0444275
A530064D06Rik	0.698241	0	174.579	199.013	0	1.0011	208.125	182.994	8.45411	2.16269e-15	8.60066	5.7934e-09
A530072M11Rik	8.02977	13.1598	9.37339	8.00226	23.4522	24.0264	5.36403	7.7634	-0.246985	0.779951	-1.8223	0.0119739
A630012P03Rik	0	0	41.0086	44.1864	0	0	59.0044	58.78	8.49692	6.40577e-08	8.31091	5.48005e-08
A630089N07Rik	186.43	165.096	37.4936	53.2324	138.581	114.125	38.6211	48.7985	-1.90558	6.24743e-11	-1.49674	3.17628e-07
A730011C13Rik	16.0595	20.3379	31.6352	22.963	11.7261	17.0187	45.0579	41.0351	0.593848	0.301325	1.61383	0.00142558
A730017L22Rik	72.268	55.0319	15.2318	18.0921	29.8482	42.0462	28.9658	33.2717	-1.91556	1.54057e-05	-0.176128	0.714224
A830019P07Rik	0	0	244.88	218.148	0	0	165.212	144.177	10.9306	2.08209e-13	9.70462	7.42627e-11
A830082K12Rik	0	0	94.9056	83.8497	0	0	53.6403	53.2347	9.55668	3.19587e-10	8.17069	1.02857e-07
A930001C03Rik	71.5697	64.6027	5.85837	2.43547	26.6502	21.0231	8.58246	3.32717	-4.28655	4.51055e-12	-1.95843	0.00943369
A930002I21Rik	19.5508	19.1415	0	0	88.4786	98.1078	0	0	-7.35688	1.32732e-05	-8.82636	4.7466e-09
A930005H10Rik	26.8823	38.2831	33.9785	41.055	67.1585	88.0968	30.0386	31.0536	0.262006	0.589598	-1.31226	0.000326409
A930006K02Rik	7.68065	13.1598	5.85837	14.9607	31.9802	44.0484	6.43684	7.7634	0.11652	0.904308	-2.38858	0.000144578
A930007I19Rik	5.93505	4.78539	144.116	133.255	5.33004	3.0033	170.576	137.523	4.6307	7.53915e-26	5.25573	4.35188e-20
A930015D03Rik	11.8701	7.17808	23.4335	24.7026	5.33004	7.0077	27.893	26.6174	1.28093	0.0521881	2.17514	0.00177937
A930024E05Rik	86.931	81.3516	9.37339	5.56679	66.0925	71.0781	10.7281	16.6359	-3.62474	1.00771e-13	-2.29426	4.45043e-07
Aaas	1268.36	1305.21	240.193	196.229	1312.26	1336.47	246.746	312.754	-2.57708	1.22062e-76	-2.20979	2.52648e-101
Aacs	1515.53	1538.5	664.339	628.699	1271.75	1274.4	443.069	460.259	-1.23649	4.73021e-37	-1.46013	1.15042e-61
Aaed1	377.05	415.132	380.794	345.489	736.611	731.804	326.133	302.773	-0.117662	0.466026	-1.18769	1.19064e-26
Aars2	225.881	232.091	73.8154	104.725	246.248	249.274	92.2614	72.0887	-1.31492	1.68786e-07	-1.55543	5.2489e-14
Aasdh	192.365	195.004	79.6738	60.1909	187.617	173.19	76.1693	87.6155	-1.49667	4.89115e-09	-1.10466	8.88464e-07
Aatk	2.09472	1.19635	29.2918	34.7924	0	1.0011	50.4219	55.4529	4.1474	7.12599e-07	6.71523	1.13581e-05
AB124611	160.595	126.813	2169.94	2258.03	305.944	256.281	2900.87	2831.42	3.91211	8.98513e-185	3.388	0
Abat	2.44384	9.57077	69.1287	68.1931	2.13202	2.0022	50.4219	46.5804	3.804	8.83419e-09	4.58896	8.52865e-08
Abca1	59.0014	57.4246	1800.86	1612.98	45.8383	27.0297	1746.53	1726.8	4.87104	6.575e-216	5.62098	3.8395e-198
Abca2	1690.09	1613.87	209.73	150.651	1459.36	1456.6	298.24	306.1	-3.22585	3.4685e-83	-2.2356	2.14994e-125
Abca4	0.349121	1.19635	44.5236	32.3569	0	2.0022	33.257	37.7079	6.08677	3.12977e-07	5.14197	1.15116e-05
Abca5	23.7402	25.1233	193.326	158.653	18.1221	8.0088	149.12	137.523	2.85791	8.94889e-21	3.50415	7.47424e-20
Abca6	0.698241	0	28.1202	35.1403	0	0	8.58246	8.87246	5.93425	1.48987e-06	5.55635	0.00279644
Abca7	1063.42	1014.5	519.051	432.818	1274.95	1254.38	582.534	529.02	-1.13248	8.71669e-17	-1.15034	5.56693e-41
Abca8a	0	0	49.2103	40.0113	0	0	8.58246	12.1996	8.55032	5.21481e-08	5.80708	0.00128311
Abca8b	1.04736	0	72.6438	64.366	0	0	76.1693	73.1978	6.44015	3.41781e-11	8.65374	1.14161e-08
Abca9	0	0	290.575	265.814	0	0	155.557	153.05	11.1967	4.62198e-14	9.70057	7.46488e-11
Abcb1a	210.171	205.772	84.3605	105.421	125.789	143.157	157.703	216.266	-1.10045	1.85923e-06	0.508362	0.0170178
Abcb1b	1183.52	1185.58	390.167	388.631	803.77	770.847	537.476	582.255	-1.59752	2.32375e-51	-0.456856	3.09402e-06
Abcb4	19.8999	27.516	4.68669	5.56679	4.26403	10.011	2.14561	8.87246	-2.14754	0.00318746	-0.349304	0.767502
Abcb6	19.2016	27.516	15.2318	12.5253	49.0364	37.0407	9.65526	11.0906	-0.736296	0.241494	-2.0172	0.000262877
Abcb8	612.358	543.141	335.099	300.259	628.945	623.685	275.711	298.336	-0.870456	8.9101e-09	-1.09103	2.68557e-20
Abcb9	1465.96	1515.77	141.772	142.301	1468.96	1439.58	188.814	205.176	-3.38181	1.52882e-172	-2.84955	4.51572e-159
Abcc2	0.698241	0	48.0386	51.1448	0	0	35.4026	48.7985	6.55924	1.56703e-08	7.82565	4.95623e-07
Abcc3	23.7402	38.2831	190.983	198.665	7.46205	16.0176	290.731	298.336	2.74583	2.98315e-18	4.66957	5.80091e-41
Abcd2	2.79297	0	15.2318	22.2671	7.46205	2.0022	17.1649	35.4898	3.38571	0.00195237	2.52426	0.00150342
Abcd3	466.425	477.342	1138.87	1147.11	571.38	532.585	984.837	983.734	1.28719	4.25572e-35	0.870281	8.60678e-22
Abce1	5632.36	5753.23	1837.18	1922.63	4128.65	4101.5	2279.71	2223.66	-1.58716	8.21393e-107	-0.834635	7.21427e-60
Abcf2	2157.22	2093.61	1067.39	1036.12	1544.65	1588.75	1187.6	1214.42	-1.01053	6.40915e-32	-0.348675	2.81511e-07
Abcg1	488.769	476.146	2289.45	2333.53	424.271	426.468	3072.52	3001.11	2.26531	1.71779e-135	2.8709	0
Abcg3	166.181	187.826	449.923	434.905	227.06	257.283	634.029	555.638	1.34296	1.18867e-16	1.33079	5.41768e-25
Abhd12	357.5	349.333	1604.02	1613.32	450.921	420.462	1908.52	1857.67	2.19102	2.47574e-103	2.1479	7.92487e-158
Abhd14a	300.942	267.982	66.7854	67.1494	314.472	271.298	51.4947	43.2532	-2.08497	2.65609e-22	-2.59081	5.84756e-30
Abhd15	33.1665	41.8721	9.37339	10.7856	59.6964	56.0616	22.5289	11.0906	-1.84813	0.000852079	-1.74365	0.000163661
Abhd16a	201.792	209.361	1117.78	1083.44	228.126	255.28	1358.17	1317.56	2.43304	1.57004e-89	2.50224	2.94234e-134
Abhd18	356.452	412.74	119.511	103.333	766.46	677.744	114.79	100.924	-1.79088	5.39396e-20	-2.70625	9.58237e-74
Abhd3	4.88769	2.39269	15.2318	13.917	4.26403	1.0011	20.3833	11.0906	1.88873	0.0379935	2.63424	0.0104829
Abhd5	174.909	168.685	563.575	519.103	168.429	149.164	419.468	449.168	1.65388	2.7509e-27	1.48784	2.21768e-23
Abhd6	92.517	71.7808	71.4721	85.2414	134.317	131.144	60.0772	57.671	-0.0665362	0.845307	-1.13724	1.5186e-05
Abhd8	915.045	905.634	194.498	197.621	680.113	667.733	154.484	164.14	-2.20525	1.0092e-68	-2.04596	1.29283e-53
Abi1	1948.44	2084.04	3181.09	3257.27	1719.47	1783.96	3811.68	3933.83	0.687162	1.71512e-17	1.1793	4.03707e-105
Abi3	122.541	136.383	166.378	171.179	141.779	138.152	381.919	379.298	0.404408	0.065896	1.47871	4.94486e-21
Abi3bp	0	1.19635	104.279	116.207	0	1.0011	32.1842	25.5083	8.53269	7.36343e-11	5.841	0.000231856
Abl2	783.078	772.84	1659.09	1633.16	497.826	528.581	1734.73	1731.24	1.08718	3.90654e-33	1.79005	1.51663e-115
Ablim1	8549.27	8521.58	1257.21	1260.53	9475.74	9509.44	1541.62	1438.45	-2.75309	0	-2.63591	0
Ablim2	3.84033	4.78539	0	4.52301	57.5644	69.0759	3.21842	3.32717	-0.744148	0.675982	-4.24011	2.68023e-09
Abr	857.44	835.05	1533.72	1429.27	752.601	757.832	2392.36	2316.82	0.810687	3.05302e-16	1.67568	2.30522e-136
Abraxas1	226.928	208.164	70.3004	72.3682	252.644	205.225	72.9509	67.6525	-1.60245	9.27534e-13	-1.66648	6.432e-14
AC090479.2	2.44384	7.17808	39.8369	26.4422	2.13202	7.0077	39.6939	27.7264	2.98318	0.000135688	2.90334	6.32425e-05
AC102342.2	1.39648	0	28.1202	15.3087	0	0	41.8395	39.9261	4.45243	0.000124861	7.78446	5.66961e-07
AC117662.4	0	0	39.8369	34.0966	0	0	34.3298	39.9261	8.2814	1.84667e-07	7.64484	1.04812e-06
AC127341.3	3.14209	9.57077	152.318	134.299	8.52806	3.0033	128.737	151.941	4.81483	9.23385e-21	4.65886	6.29023e-20
AC129328.1	139.299	148.347	62.0987	43.8384	125.789	104.114	77.2421	48.7985	-1.4726	9.45768e-07	-0.828455	0.00430942
AC130815.2	2.44384	4.78539	51.5536	51.8407	4.26403	10.011	47.2035	52.1257	4.04311	7.26527e-10	2.82142	1.08954e-06
AC132455.3	0.698241	0	12.8884	18.0921	0	2.0022	27.893	27.7264	4.94547	0.000440393	4.79193	7.1101e-05
AC133103.1	5.23681	0	58.5837	74.8037	1.06601	2.0022	105.135	85.3974	4.5044	0.00236751	5.97935	4.07443e-11
AC138768.1	28.6279	43.0685	49.2103	47.6656	17.0561	16.0176	39.6939	39.9261	0.481641	0.275949	1.30323	0.00896243
AC154187.1	0.349121	0	43.3519	49.4052	0	0	56.8588	66.5434	7.30736	1.04628e-07	8.3776	4.10346e-08
AC163032.1	85.5346	80.1552	74.9871	66.8014	163.099	168.185	93.3342	67.6525	-0.235209	0.446358	-1.00428	2.28891e-05
AC163635.1	1.04736	0	26.9485	26.4422	3.19802	2.0022	52.5675	49.9076	5.13024	5.31659e-06	4.34471	2.84114e-08
AC168977.1	0.698241	2.39269	48.0386	59.495	1.06601	0	42.9123	54.3438	5.56909	3.98434e-10	6.59058	1.79479e-05
AC173344.1	0.349121	0	23.4335	26.0943	2.13202	1.0011	16.0921	19.963	6.40531	1.09502e-05	3.57146	0.00145094
Acaa1a	609.565	464.182	1088.48	1338.46	576.71	586.644	1203.69	1167.84	1.17765	3.9471e-11	1.06261	2.04439e-36
Acaa2	711.508	687.899	547.172	522.234	922.097	981.078	476.326	418.115	-0.386446	0.00110047	-1.05382	4.2995e-26
Acaca	1599.67	1296.84	396.026	444.995	1091.59	1114.22	444.142	451.386	-1.7734	1.42735e-32	-1.26561	3.0056e-43
Acacb	6.98241	9.57077	120.682	101.246	27.7162	27.0297	121.227	136.414	3.83039	1.91992e-18	2.26957	6.54368e-13
Acad10	86.2328	66.9954	24.6051	35.4883	87.4126	83.0913	23.6018	34.3808	-1.31547	0.00105665	-1.52319	2.17039e-05
Acad11	575.002	568.265	171.064	161.437	428.535	422.464	177.013	192.976	-1.78326	6.63983e-34	-1.16701	7.71567e-16
Acad12	87.2802	95.7077	21.0901	30.2694	75.6866	90.099	22.5289	23.2902	-1.76715	1.86341e-06	-1.82138	1.53357e-06
Acadsb	522.983	559.89	879.927	907.734	367.773	396.435	827.134	847.32	0.739189	5.32015e-11	1.16588	5.13969e-30
Acap1	2931.92	2761.17	131.227	118.99	2819.59	2814.09	225.289	204.067	-4.52477	0	-3.67773	0
Acap3	401.489	434.274	164.034	135.342	404.017	360.396	193.105	169.686	-1.49124	3.75529e-16	-1.03856	1.4408e-11
Acat1	1014.54	947.506	2044.57	1954.99	1337.84	1251.37	1558.79	1501.66	1.02892	8.38173e-28	0.277059	6.34542e-05
Acat2	1104.27	1159.26	356.189	430.382	1423.12	1435.58	213.489	191.867	-1.50017	1.53842e-28	-2.78208	1.20341e-152
Acat3	11.1719	15.5525	29.2918	11.8294	55.4324	48.0528	19.3105	17.7449	0.606139	0.437986	-1.44513	0.00148783
Acbd3	817.99	766.858	1498.57	1412.22	725.951	790.869	1585.61	1696.86	0.877589	9.35766e-18	1.14774	8.6455e-52
Accs	57.6049	58.621	58.5837	57.0596	99.1387	121.133	53.6403	52.1257	-0.00034348	0.999214	-1.02438	0.000398568
Ace	0	0	577.635	552.851	6.39605	16.0176	460.234	460.259	12.2216	1.15021e-16	5.37728	8.7013e-57
Acer2	32.1191	32.3014	100.764	83.1539	59.6964	51.0561	72.9509	72.0887	1.50884	1.05953e-05	0.42567	0.190906
Acer3	148.027	166.292	1397.81	1408.05	204.673	175.192	1770.13	1683.55	3.18907	2.31466e-143	3.22242	5.44466e-214
Ache	1.04736	0	29.2918	13.2211	5.33004	3.0033	10.7281	14.4177	4.81262	0.000151991	1.63378	0.0906263
Ackr1	0	0	45.6953	44.8822	2.13202	0	5.36403	3.32717	8.58086	4.1733e-08	2.08914	0.253096
Ackr3	0	0	598.725	560.506	0	0	78.3149	88.7246	12.257	9.40615e-17	8.81453	5.44085e-09
Acly	6244.37	6006.86	2827.25	2711.02	5857.71	5907.49	2949.15	3036.6	-1.13981	1.32104e-54	-0.939962	1.77569e-90
Acod1	347.026	358.904	4199.28	4096.46	49.0364	45.0495	6112.85	6035.49	3.56785	0	7.04958	0
Acot1	60.0487	57.4246	11.7167	10.7856	39.4423	30.033	6.43684	4.43623	-2.39639	2.34012e-07	-2.63621	0.000126707
Acot11	150.122	168.685	50.382	42.4467	201.475	197.217	75.0965	82.0702	-1.79141	7.39508e-11	-1.3083	2.16726e-09
Acot6	90.4222	81.3516	12.8884	6.95848	41.5743	53.0583	9.65526	18.854	-3.24891	8.38176e-12	-1.7014	0.000857771
Acot7	1817.52	1770.59	645.592	678.8	1418.86	1390.53	688.742	690.943	-1.42625	1.1051e-51	-0.990669	2.83645e-37
Acox3	1098.33	1107.82	509.678	435.949	488.232	534.587	534.258	607.763	-1.22621	2.59435e-22	0.192867	0.0917701
Acp2	244.035	259.607	2592.91	2612.56	188.683	178.196	3158.34	3067.65	3.38931	6.67408e-252	4.12121	0
Acp5	473.757	415.132	383.137	332.615	789.912	800.88	359.39	327.172	-0.32157	0.0543756	-1.17664	6.09892e-28
Acp6	387.524	355.315	146.459	167.352	459.449	444.488	153.411	161.922	-1.22544	7.00135e-12	-1.48438	8.0587e-24
Acpp	98.8011	110.064	41.0086	35.8362	54.3664	38.0418	17.1649	33.2717	-1.44677	4.44619e-06	-0.839829	0.0741171
Acrbp	24.0893	25.1233	16.4034	22.2671	24.5182	30.033	11.8009	7.7634	-0.303858	0.59963	-1.44272	0.0242131
Acsbg1	47.4804	47.8539	12.8884	11.1336	111.931	119.131	24.6746	26.6174	-2.00729	3.98555e-05	-2.13728	1.56842e-10
Acsl1	285.581	291.909	1056.85	1096.66	160.967	156.172	1470.82	1448.43	1.91156	7.15872e-62	3.23811	4.54272e-188
Acsl3	373.908	361.297	1321.65	1312.72	566.05	528.581	705.907	688.725	1.84406	4.30267e-68	0.385286	0.000133999
Acsl4	4276.03	4639.43	1976.61	2102.85	3042.39	2999.29	2498.57	2478.74	-1.11559	2.48471e-38	-0.244337	4.97067e-06
Acss1	194.111	227.306	589.352	563.985	469.043	478.526	512.802	474.676	1.47672	1.52807e-21	0.0948702	0.425313
Acss2	198.999	198.594	151.146	156.218	529.806	538.592	137.319	108.688	-0.360206	0.0701832	-2.08186	3.61233e-42
Acta2	0	3.58904	31.6352	35.1403	1.06601	0	26.8202	33.2717	4.40323	0.0439719	5.89547	0.00019207
Actn1	2496.21	2511.13	421.802	459.26	2165.06	2195.41	408.739	374.861	-2.48768	1.43247e-147	-2.44053	3.78713e-201
Actr2	10073.9	10200.1	15643	15881.7	9292.39	9275.19	18346.1	18408.1	0.645466	4.04524e-28	1.02024	1.28891e-173
Actr3b	24.0893	23.9269	22.2618	13.569	28.7822	26.0286	12.8737	9.98151	-0.467189	0.446892	-1.2246	0.0461364
Acvr1	71.5697	66.9954	413.601	410.203	22.3862	34.0374	366.9	351.571	2.56564	3.9974e-43	3.69845	2.79928e-50
Acvr2a	21.9946	33.4977	362.047	293.3	21.3202	22.0242	333.643	331.608	3.65299	2.69536e-36	3.97453	5.13119e-48
Acvrl1	142.441	162.703	1273.61	1241.05	543.664	543.597	1726.15	1611.46	3.07474	1.21492e-121	1.65351	5.53391e-96
Acy1	169.673	168.685	83.1888	98.4625	191.881	206.227	47.2035	57.671	-0.870661	0.000243762	-1.89126	6.7702e-15
Acy3	1.39648	1.19635	36.3219	50.7969	0	1.0011	28.9658	27.7264	5.04386	6.04811e-09	5.81516	0.000248756
Acyp2	18.1543	15.5525	115.996	113.423	15.9901	14.0154	81.5333	95.3789	2.73938	7.35371e-15	2.59624	1.89815e-10
Adal	200.046	235.68	79.6738	94.9833	164.165	174.191	100.844	92.0517	-1.28079	6.29496e-08	-0.775462	0.000419906
Adam12	0.349121	1.19635	410.086	397.329	1.06601	0	302.532	339.371	9.54271	4.27141e-20	9.31425	2.24954e-10
Adam15	265.681	235.68	1461.08	1451.19	187.617	163.179	1516.95	1568.21	2.52791	1.99536e-101	3.17395	1.57514e-192
Adam17	1026.41	1107.82	2490.98	2356.84	1177.94	1242.36	3010.3	3023.29	1.1951	6.70662e-38	1.35242	3.60472e-114
Adam19	1173.39	1202.33	254.253	290.865	1488.15	1560.71	393.72	391.497	-2.0979	5.53474e-64	-1.9222	9.65724e-107
Adam23	0	1.19635	74.9871	54.6241	0	0	34.3298	27.7264	7.73343	1.07381e-08	7.38707	3.15949e-06
Adam8	1383.22	1317.18	2325.77	2313.7	423.205	442.486	3200.18	3261.74	0.785292	5.88275e-21	2.93443	0
Adam9	430.117	433.077	3257.25	3231.87	424.271	422.464	3671.15	3612.2	2.91883	1.3887e-247	3.13987	0
Adamts1	1.04736	0	1244.32	1307.85	0	0	720.926	697.597	10.6321	1.00348e-35	11.9012	5.40248e-16
Adamts10	309.67	307.461	80.8455	77.935	427.469	418.46	78.3149	89.8336	-1.95746	1.46996e-23	-2.29666	6.35371e-39
Adamts12	0	0	52.7253	70.9765	0	0	35.4026	43.2532	9.04388	5.21157e-09	7.72773	7.37205e-07
Adamts15	0	0	55.0687	53.2324	2.13202	0	5.36403	4.43623	8.83791	1.17645e-08	2.26266	0.198349
Adamts2	0	0	281.202	288.777	0	0	49.3491	43.2532	11.2366	3.58988e-14	7.96429	2.60168e-07
Adamts20	0	0	58.5837	63.6701	1.06601	0	36.4754	36.5989	9.01835	4.87714e-09	6.17862	7.41335e-05
Adamts4	3.49121	4.78539	202.7	183.704	2.13202	4.0044	157.703	188.54	5.66009	4.01755e-33	5.83988	7.5096e-20
Adamts5	0	0	523.738	551.46	2.13202	0	60.0772	57.671	12.1532	1.74055e-16	5.86573	1.52482e-07
Adamts6	238.1	235.68	70.3004	58.1033	228.126	238.262	109.426	93.1608	-1.90646	1.5804e-16	-1.1671	4.38522e-09
Adamtsl1	0.349121	0	79.6738	71.6724	0	1.0011	13.9465	15.5268	8.00003	1.97039e-09	4.872	0.00407022
Adamtsl2	0	0	26.9485	28.5298	0	0	18.2377	18.854	7.87723	1.22202e-06	6.64381	6.22221e-05
Adamtsl4	20.249	33.4977	305.807	293.3	7.46205	19.0209	310.041	265.065	3.59606	3.70383e-35	4.46563	1.62018e-20
Adamtsl5	39.7998	31.105	118.339	107.161	50.1024	55.0605	80.4605	75.4159	1.63414	3.81104e-07	0.60233	0.0585657
Adap2	8.3789	5.98173	788.536	824.58	1.06601	0	1112.5	1091.31	6.70356	1.25073e-105	11.0944	2.68561e-14
Adar	1257.18	1284.88	2154.71	2146	1002.05	950.043	2962.02	2856.93	0.767989	3.94234e-21	1.61156	9.4172e-145
Adarb1	278.598	297.89	29.2918	24.3547	149.241	149.164	24.6746	42.1442	-3.46001	1.26428e-41	-2.12773	1.4313e-12
Adat1	112.068	147.151	26.9485	16.0045	117.261	105.115	32.1842	19.963	-2.65934	1.63071e-11	-2.05316	2.29768e-09
Adat2	129.524	104.082	63.2704	60.8867	111.931	125.137	51.4947	38.817	-0.92415	0.00155747	-1.35602	4.09854e-06
Adck5	276.504	264.393	70.3004	72.3682	270.766	236.259	79.3877	94.2699	-1.91306	3.80185e-20	-1.51104	1.25782e-13
Adcy3	532.409	532.374	284.717	234.153	398.687	424.466	214.561	190.758	-1.04652	1.05934e-10	-0.98666	9.79053e-12
Adcy4	2.79297	2.39269	18.7468	15.6566	3.19802	5.0055	19.3105	14.4177	2.69105	0.00270621	2.0702	0.0191757
Adcy6	408.471	318.228	147.631	171.527	385.895	407.448	99.771	128.651	-1.17755	3.07181e-08	-1.76322	2.58215e-25
Adcy9	4.88769	7.17808	21.0901	18.0921	9.59407	7.0077	21.4561	27.7264	1.76348	0.0187387	1.60454	0.0177336
Add1	2870.47	2804.24	1395.46	1314.81	3445.34	3508.85	1540.55	1575.97	-1.06262	6.76741e-37	-1.12304	1.43701e-90
Add3	1038.63	1064.75	898.674	925.478	2269.53	2309.54	659.776	686.506	-0.193731	0.0528799	-1.73132	1.12365e-135
Adgb	0.349121	0	121.854	129.776	1.06601	0	119.082	139.741	8.74023	2.19758e-11	8.00351	7.46129e-08
Adgra2	0.349121	3.58904	227.305	179.529	2.13202	5.0055	129.81	109.797	7.06954	1.62361e-08	5.08847	2.16919e-16
Adgra3	80.2977	81.3516	374.936	315.915	97.0067	91.1001	259.619	249.538	2.09664	5.29515e-24	1.4726	2.86295e-14
Adgrd1	6.63329	11.9635	310.493	335.051	8.52806	7.0077	49.3491	66.5434	5.32622	5.7552e-52	2.93626	6.86189e-08
Adgre1	10.4736	7.17808	6362.19	6276.55	2.13202	0	7618	7666.91	9.35466	1.17517e-293	12.8887	7.0489e-36
Adgre4	0	0	130.056	142.301	0	0	166.285	139.741	10.1742	1.25085e-11	9.68897	8.08783e-11
Adgrf5	0.349121	0	21.0901	19.8317	0	0	23.6018	12.1996	6.12294	4.00567e-05	6.59476	8.41279e-05
Adgrg1	20.9472	23.9269	398.369	384.456	56.4984	76.0836	225.289	199.63	4.16886	2.61512e-65	1.7124	5.65473e-14
Adgrg2	0.349121	0	42.1802	38.9675	1.06601	0	3.21842	4.43623	7.1047	2.99746e-07	2.91489	0.184399
Adgrg3	28.6279	23.9269	8.20171	4.17509	13.8581	10.011	3.21842	3.32717	-2.20946	0.00215314	-1.82989	0.0784843
Adgrg5	385.778	354.119	86.7038	82.1101	434.931	471.518	121.227	119.778	-2.1383	2.52897e-29	-1.87642	1.88462e-32
Adgrg6	0.698241	4.78539	174.579	202.84	1.06601	0	158.775	120.887	6.42146	3.68107e-09	8.11662	4.7868e-08
Adgrl1	399.394	403.169	86.7038	82.8059	628.945	633.696	76.1693	79.8521	-2.24321	1.47713e-35	-2.98196	2.36202e-74
Adgrl2	4.88769	8.37443	261.283	292.604	3.19802	7.0077	231.726	224.03	5.58498	3.20739e-45	5.50047	4.93319e-28
Adh1	8.02977	13.1598	33.9785	22.6151	6.39605	6.0066	9.65526	11.0906	1.46901	0.0242577	0.777292	0.409042
Adhfe1	1.04736	3.58904	276.515	283.21	1.06601	2.0022	237.09	242.884	7.41194	2.04389e-31	7.31101	3.29283e-17
Adk	872.452	905.634	404.227	443.255	1040.42	993.091	474.181	487.985	-1.05027	2.0912e-18	-1.04436	3.06864e-29
Adm	2.79297	2.39269	84.3605	92.5478	15.9901	23.0253	28.9658	37.7079	5.05393	3.36168e-17	0.803773	0.123252
Adnp	36.6577	25.1233	7.03004	7.65433	26.6502	17.0187	16.0921	8.87246	-2.07441	0.00117793	-0.765749	0.253456
Adora2b	57.6049	52.6392	357.36	371.235	18.1221	17.0187	355.099	407.024	2.71542	6.41481e-41	4.4747	2.92478e-53
Adora3	47.8295	45.4612	30.4635	36.88	8.52806	6.0066	35.4026	32.1627	-0.445943	0.288151	2.25698	0.000356127
Adprhl2	624.228	605.351	278.858	310.696	373.103	414.455	292.876	232.902	-1.04332	4.75758e-14	-0.547284	0.000194648
Adrb1	0	0	19.9184	7.65433	1.06601	0	8.58246	11.0906	6.83207	0.000223377	4.28164	0.0173276
Adrb2	70.8715	68.1917	295.262	323.569	63.9605	47.0517	285.367	289.464	2.15997	7.78616e-26	2.41186	5.44461e-29
Adsl	1501.22	1594.73	468.669	476.308	1273.88	1350.48	613.646	623.29	-1.69952	3.38114e-62	-1.05054	2.35366e-37
Adss	2581.4	2720.49	1192.76	1163.46	2354.81	2301.53	1239.09	1306.47	-1.1618	1.84228e-43	-0.836239	4.2434e-41
Adssl1	22.6928	21.5342	562.403	560.506	162.033	191.21	606.136	647.689	4.6572	3.69154e-96	1.8604	2.68868e-44
Aebp1	2.44384	7.17808	2251.96	2179.4	7.46205	5.0055	1211.2	1235.49	9.29552	5.56189e-111	7.66037	8.44098e-72
Aebp2	8311.86	8687.87	3594.69	3566.57	4841.81	4746.21	3640.03	3566.73	-1.23855	4.01122e-76	-0.376585	1.78724e-15
Aen	1291.75	1290.86	271.828	291.213	430.667	416.457	241.382	272.828	-2.1797	1.44661e-83	-0.685566	4.98288e-07
Afap1	65.2856	84.9406	376.107	301.65	51.1684	53.0583	382.992	339.371	2.20815	5.46968e-20	2.82801	1.14099e-42
Afap1l2	0.349121	0	60.927	44.1864	3.19802	2.0022	24.6746	23.2902	7.46694	5.23053e-08	3.24826	0.000320519
Afdn	339.345	354.119	1409.52	1430.66	617.219	595.654	1041.7	1010.35	2.0486	2.75102e-84	0.794248	1.02799e-19
Aff1	1065.87	1009.72	2162.91	2071.19	725.951	745.819	2551.13	2540.85	1.03094	4.92107e-30	1.82549	2.08648e-166
Aff3	901.08	924.776	243.708	268.597	1053.22	1116.23	240.309	204.067	-1.81163	1.99121e-46	-2.25138	1.6604e-89
Aff4	881.879	939.132	2864.74	2715.55	922.097	982.079	3427.62	3461.37	1.62717	3.59212e-73	1.88951	9.93442e-211
Afg3l2	1716.28	1677.28	755.729	779.35	2637.3	2730	878.629	820.702	-1.13487	3.11774e-35	-1.62383	1.26002e-133
Afmid	38.4033	22.7306	4.68669	13.2211	62.8945	67.0737	19.3105	9.98151	-1.68316	0.0231693	-2.11005	4.20709e-06
Afp	120.796	117.242	7.03004	15.6566	70.3565	82.0902	17.1649	12.1996	-3.23818	3.55319e-14	-2.33916	7.05673e-08
Agap1	12.9175	20.3379	273	326.701	9.59407	4.0044	237.09	218.484	4.30877	1.85524e-42	5.11855	4.73827e-30
Agap2	784.474	728.575	76.1588	53.9282	764.328	755.83	131.955	149.723	-3.59996	1.34883e-72	-2.39794	8.58201e-72
Agbl5	261.142	228.502	71.4721	72.0203	449.855	422.464	64.3684	62.1072	-1.77014	2.00982e-15	-2.7502	4.61678e-48
Agfg2	429.768	424.703	207.386	178.833	553.258	521.573	224.217	196.303	-1.15491	3.09654e-12	-1.31749	7.9151e-23
Agmo	0.349121	0	49.2103	80.3705	0	0	40.7667	37.7079	7.80077	1.19855e-08	7.72529	7.34644e-07
Ago4	9.42626	8.37443	87.8755	76.1954	7.46205	7.0077	116.936	110.906	3.17497	1.1625e-12	4.01341	4.71509e-17
Agpat3	2448.03	2363.98	1079.11	1042.73	1330.38	1421.56	963.381	1038.08	-1.17732	2.16667e-43	-0.425103	1.72282e-08
Agrn	130.92	138.776	430.004	446.387	94.8747	100.11	483.836	509.057	1.7192	7.56229e-26	2.38243	5.43596e-50
Agt	0	0	41.0086	41.055	0	0	48.2763	19.963	8.43937	8.32809e-08	7.52576	2.32188e-06
Agtrap	300.244	281.141	1354.45	1331.51	370.971	415.456	1167.21	1064.69	2.20521	1.03656e-86	1.53913	2.28743e-55
Ahctf1	2644.94	2645.12	785.021	770.304	1682.16	1742.91	1015.95	998.151	-1.76005	2.683e-99	-0.731008	1.59086e-26
Ahcy	1851.04	1295.64	246.051	329.136	1630.99	1569.72	287.512	249.538	-2.43975	2.12656e-13	-2.53878	7.27513e-152
Ahdc1	470.615	433.077	53.897	48.7094	338.99	314.345	95.4798	66.5434	-3.15747	4.17112e-56	-1.9735	1.18411e-23
Ahnak	3161.99	3208.6	9731.92	9818.42	4590.23	4591.04	10358	10420.7	1.62666	8.46487e-148	1.21344	1.63948e-196
Ahnak2	74.7118	81.3516	125.369	125.949	39.4423	24.0264	155.557	114.233	0.706099	0.0059863	2.12989	2.5085e-11
Ahr	81.6942	80.1552	527.253	558.766	66.0925	56.0616	615.791	611.091	2.75301	5.86897e-59	3.36623	8.49134e-83
Ahrr	30.0244	31.105	31.6352	24.3547	13.8581	9.0099	42.9123	33.2717	-0.142564	0.779687	1.7773	0.00140748
AI413582	144.885	126.813	285.888	287.037	132.185	162.178	333.643	289.464	1.06825	1.75986e-08	1.11554	1.05093e-10
AI427809	0	0	17.5751	14.6128	0	0	20.3833	13.3087	7.08041	4.38815e-05	6.50652	0.00011005
AI429214	11.1719	7.17808	76.1588	60.8867	10.6601	4.0044	40.7667	45.4713	2.80838	8.942e-09	2.60377	1.54548e-05
AI464131	3.84033	2.39269	45.6953	37.9237	19.1881	13.0143	24.6746	27.7264	3.62401	8.582e-08	0.740573	0.203756
AI467606	888.861	892.474	139.429	159.001	760.064	778.855	197.396	199.63	-2.54766	5.84481e-74	-1.91971	3.89131e-56
AI480526	116.606	119.635	22.2618	17.7441	150.307	147.162	31.1114	25.5083	-2.59968	4.90355e-14	-2.35651	1.11897e-14
AI506816	2959.84	1869.89	903.36	1361.08	2301.51	2279.5	992.346	1029.21	-1.08475	0.0173452	-1.14524	4.97297e-71
AI597479	573.954	590.995	251.91	245.982	455.185	510.561	350.808	277.264	-1.21948	2.34414e-19	-0.585088	1.74738e-05
AI606181	73.6645	64.6027	166.378	155.174	95.9407	92.1012	112.645	109.797	1.20273	1.45963e-06	0.277985	0.274237
AI839979	0	0	154.661	186.835	1.06601	1.0011	219.925	258.41	10.5042	2.33713e-12	7.89026	7.76507e-14
AI847159	19.5508	28.7123	0	3.13132	25.5842	39.0429	10.7281	2.21811	-3.53729	0.000434365	-2.27683	0.00121625
AI854703	71.9189	40.6758	1.17167	1.3917	83.1486	93.1023	5.36403	3.32717	-5.41722	4.09769e-10	-4.30247	1.8596e-12
Aida	1042.82	931.954	1778.6	2029.09	743.007	735.808	1943.93	1844.36	0.953224	9.24898e-16	1.39255	2.38323e-84
Aif1	7.33153	13.1598	7113.23	6866.98	11.7261	4.0044	7467.81	7542.7	9.65636	2.23416e-281	9.95557	4.62452e-154
Aif1l	4.53857	5.98173	108.966	117.946	11.7261	9.0099	64.3684	63.2163	4.52974	2.15065e-21	2.66036	4.66295e-08
Aifm2	68.7768	51.4429	205.043	217.453	73.5545	85.0935	192.032	237.338	1.78419	2.9222e-12	1.46907	1.90778e-11
Aire	0	0	77.3304	58.1033	0	0	31.1114	46.5804	9.14977	2.94826e-09	7.70934	8.4256e-07
Airn	25.8349	27.516	10.5451	8.6981	20.2541	17.0187	11.8009	3.32717	-1.4893	0.0150501	-1.2582	0.110748
Ajm1	43.6401	44.2648	3.51502	3.47924	114.063	101.111	3.21842	5.54529	-3.64595	1.64559e-08	-4.58776	1.19013e-14
Ajuba	144.536	131.598	151.146	148.216	49.0364	50.055	108.354	130.869	0.113156	0.626222	1.30565	4.07762e-06
Ak1	711.857	774.036	127.712	108.9	76.7526	56.0616	79.3877	92.0517	-2.6659	8.39298e-62	0.405356	0.185338
Ak4	612.358	594.584	419.459	408.115	1080.93	1136.25	327.206	331.608	-0.541314	1.44133e-05	-1.71604	5.22617e-67
Ak8	0.349121	1.19635	26.9485	22.2671	1.06601	1.0011	7.50965	7.7634	5.42737	1.50355e-05	2.92129	0.0560603
Akap1	1030.25	1052.78	251.91	235.197	467.977	464.51	253.182	219.593	-2.09755	3.02478e-67	-0.943878	3.22189e-12
Akap11	1275.69	1417.67	619.815	607.823	1208.85	1201.32	669.432	754.159	-1.1225	2.10518e-24	-0.725095	4.54983e-18
Akap12	116.257	128.009	154.661	167.004	138.581	165.181	57.9316	69.8706	0.421696	0.0627684	-1.21615	1.67366e-06
Akap13	6115.2	6097.78	1646.2	1614.02	3396.3	3471.81	2149.91	2152.68	-1.89881	2.26265e-165	-0.639708	1.5575e-33
Akap6	0.349121	1.19635	42.1802	59.1471	0	0	28.9658	36.5989	6.52459	1.76267e-08	7.465	2.28148e-06
Akap7	59.0014	58.621	502.648	435.949	22.3862	50.055	367.973	362.662	2.9962	3.84861e-51	3.36591	5.04426e-11
Akap8	2062.26	2142.66	1025.21	1050.04	1451.9	1306.43	1103.92	1163.4	-1.00721	7.60444e-32	-0.247241	0.0011637
Akirin2	640.985	699.863	1634.48	1508.95	772.856	791.87	1230.51	1151.2	1.24122	2.57354e-30	0.641293	1.50508e-15
Akna	2826.83	2567.36	418.287	406.027	3227.87	3284.61	767.057	741.959	-2.70822	1.24836e-148	-2.07431	6.09473e-228
Akr1a1	3786.21	3781.65	16346	16471.1	3944.23	3905.29	14137.5	14032.9	2.12463	2.66773e-275	1.87871	0
Akr1b8	59.6996	62.21	398.369	382.021	22.3862	19.0209	258.546	247.32	2.69215	1.18597e-43	3.64902	5.85299e-36
Akr1c12	15.7104	9.57077	31.6352	33.4007	0	7.0077	25.7474	22.1811	1.30886	0.0232129	2.8015	0.134013
Akr1c13	88.6766	62.21	296.433	304.782	22.3862	23.0253	262.838	247.32	1.9591	2.57156e-16	3.52467	8.69872e-36
Akr1c18	8.02977	9.57077	60.927	74.8037	0	1.0011	4.29123	7.7634	3.00698	4.65449e-10	3.58294	0.0708195
Akr7a5	179.797	171.078	141.772	136.734	206.806	201.221	97.6254	96.488	-0.33377	0.115966	-1.03637	5.17372e-07
Akt3	488.769	518.018	670.197	726.814	498.892	430.473	1074.95	1165.62	0.490286	8.46371e-05	1.30585	3.05359e-42
AL805899.1	12.9175	16.7489	44.5236	46.9698	15.9901	19.0209	20.3833	33.2717	1.67989	0.000518438	0.647471	0.262155
AL805899.2	1.04736	1.19635	44.5236	33.0528	2.13202	2.0022	22.5289	24.3993	5.14877	4.39829e-08	3.54071	0.000259279
Aldh1a1	1.39648	1.19635	66.7854	59.1471	5.33004	3.0033	47.2035	53.2347	5.55005	3.86832e-12	3.63583	5.97771e-08
Aldh1a2	1.04736	0	48.0386	51.1448	0	0	16.0921	9.98151	5.99461	3.10141e-09	6.13685	0.000425978
Aldh1a3	0.698241	0	192.154	167.352	1.06601	0	27.893	17.7449	8.3872	4.00468e-15	5.50011	0.00069053
Aldh1b1	191.318	193.808	254.253	267.206	117.261	132.145	337.934	398.152	0.450547	0.0109116	1.59449	3.76694e-21
Aldh1l1	56.2084	43.0685	540.141	567.464	42.6403	42.0462	473.108	450.277	3.43216	2.86703e-66	3.48229	9.98575e-64
Aldh1l2	0.698241	1.19635	100.764	112.379	38.3763	35.0385	108.354	96.488	7.03831	1.78753e-14	1.51702	1.47867e-06
Aldh2	847.665	789.589	2842.48	2754.17	782.45	850.935	2153.12	2081.7	1.77398	1.1435e-86	1.40881	1.46099e-91
Aldh3b1	9.42626	10.7671	843.605	890.338	2.13202	10.011	1024.53	974.861	6.48168	6.8213e-119	7.37012	6.37653e-66
Aldh5a1	8.3789	13.1598	60.927	53.2324	12.7921	15.0165	26.8202	26.6174	2.49632	6.85055e-07	0.975898	0.0969977
Aldh6a1	78.9013	89.726	251.91	252.941	102.337	143.157	287.512	257.301	1.60963	1.88888e-14	1.18238	6.29183e-10
Aldoc	220.644	217.735	399.541	493.356	1351.7	1470.62	347.589	338.262	1.04288	5.20579e-09	-2.00603	1.20512e-100
Alg10b	1748.75	1879.46	925.622	856.589	1701.35	1700.87	1014.88	1100.18	-1.01996	5.14074e-24	-0.651089	5.68347e-21
Alg14	62.4926	86.1369	372.592	357.318	78.8846	78.0858	271.42	265.065	2.35056	9.23078e-26	1.8084	8.10763e-20
Alg6	179.099	230.895	756.901	688.194	244.116	284.312	544.986	543.438	1.84741	1.34691e-26	1.07603	1.73008e-17
Alkbh4	228.674	241.662	59.7553	77.935	134.317	180.198	75.0965	82.0702	-1.72597	6.23043e-13	-0.967978	8.22288e-05
Alkbh7	85.1854	71.7808	157.004	180.225	106.601	103.113	101.917	117.56	1.09957	1.33456e-05	0.100335	0.69983
Alkbh8	733.852	760.876	206.215	181.616	616.152	638.702	196.324	221.811	-1.9542	8.5427e-43	-1.55141	6.91791e-34
Alox5	20.249	16.7489	94.9056	106.465	24.5182	15.0165	19.3105	14.4177	2.42185	3.5601e-11	-0.189196	0.775607
Alox5ap	21.6455	32.3014	3684.91	3534.91	17.0561	23.0253	3532.75	3602.22	7.2148	0	7.50433	1.10206e-218
Alpk1	39.4506	52.6392	250.738	243.199	43.7063	38.0418	494.564	556.747	2.48195	9.0571e-23	3.72207	1.03415e-72
Als2cl	807.516	821.89	73.8154	51.1448	1122.51	1072.18	92.2614	67.6525	-3.76971	3.07159e-81	-3.74028	1.9483e-138
Alx1	0	0	215.588	222.671	0	0	141.611	164.14	10.8578	2.97905e-13	9.68661	8.11302e-11
Amdhd1	5.93505	3.58904	48.0386	38.6196	8.52806	16.0176	22.5289	21.0721	3.07108	7.67095e-07	0.858672	0.19219
Amdhd2	210.52	179.452	915.077	886.859	282.492	247.272	828.207	763.031	2.19271	3.32139e-54	1.62371	7.43373e-45
Amer1	136.157	130.402	53.897	52.8845	180.155	206.227	63.2956	72.0887	-1.31812	9.13775e-07	-1.47953	1.62187e-10
Amigo1	70.8715	65.7991	23.4335	15.3087	107.667	112.123	24.6746	28.8355	-1.88235	1.35623e-05	-2.00452	2.28657e-09
Amigo2	119.399	110.064	11.7167	9.04603	24.5182	20.022	4.29123	8.87246	-3.53025	1.39456e-18	-1.7271	0.0209026
Amigo3	32.4682	20.3379	117.167	93.9395	22.3862	9.0099	95.4798	97.597	1.93362	4.88737e-07	2.66781	5.84743e-11
Ammecr1	456.301	479.735	198.013	183.704	476.505	499.549	243.527	208.503	-1.29233	5.18195e-17	-1.07475	2.60908e-15
Amn1	105.434	129.205	265.97	259.203	91.6767	97.1067	223.144	235.12	1.19301	1.0762e-08	1.3137	4.62225e-11
Amot	8.3789	4.78539	45.6953	27.1381	21.3202	17.0187	40.7667	29.9445	2.35929	0.000428802	0.921691	0.0715114
Amotl1	10.8227	8.37443	1041.62	1120.32	7.46205	8.0088	586.825	520.148	6.73562	1.06878e-135	6.19494	4.40999e-55
Amotl2	0	0	288.232	269.641	2.13202	0	169.504	160.813	11.2015	4.44084e-14	7.35579	4.77703e-12
Ampd2	1314.79	1281.29	270.657	276.948	830.42	897.986	298.24	317.19	-2.23502	6.20796e-90	-1.45552	6.19181e-41
Ampd3	45.0366	61.0137	157.004	163.872	14.9241	18.0198	142.683	165.25	1.65026	4.72928e-09	3.256	7.93497e-21
Amt	26.184	20.3379	2.34335	2.08754	40.5083	48.0528	1.07281	6.65434	-3.42979	7.40496e-05	-3.49781	1.62219e-06
Amz1	45.0366	49.0502	360.875	357.666	55.4324	64.0704	413.031	399.261	2.95927	1.94371e-45	2.79794	3.66875e-48
Amz2	240.544	233.288	606.927	616.174	425.337	353.388	555.714	553.42	1.37272	2.4867e-24	0.546963	5.3166e-06
Anapc1	3303.03	3355.75	1171.67	1108.49	3495.44	3496.84	1641.39	1440.67	-1.54183	5.31757e-80	-1.14613	7.22963e-76
Ang	0.698241	1.19635	79.6738	82.1101	0	0	23.6018	19.963	6.63394	1.41662e-12	6.87651	2.52501e-05
Angel1	142.092	160.31	50.382	47.6656	132.185	120.132	47.2035	43.2532	-1.61712	1.90976e-09	-1.44363	4.03828e-07
Angpt1	4.18945	4.78539	37.4936	24.3547	15.9901	5.0055	18.2377	14.4177	2.79694	8.39164e-05	0.681887	0.381124
Angpt2	0	0	99.5922	95.3312	0	0	83.6789	73.1978	9.68531	1.58939e-10	8.72481	8.29668e-09
Angptl2	91.8187	106.475	269.485	285.646	31.9802	32.0352	133.028	123.105	1.51746	9.46904e-14	2.03582	1.99742e-11
Angptl3	2.09472	1.19635	12.8884	5.91471	0	2.0022	22.5289	18.854	2.3724	0.0560547	4.36755	0.000529069
Angptl6	18.8525	16.7489	14.0601	11.1336	40.5083	46.0506	8.58246	16.6359	-0.530322	0.433009	-1.74917	0.00104466
Ank1	4.53857	2.39269	17.5751	16.3524	4.26403	10.011	12.8737	23.2902	2.181	0.0119312	1.3659	0.0858616
Ank2	0	0	306.978	277.991	3.19802	0	292.876	285.028	11.2686	3.11358e-14	7.5779	1.51858e-18
Ankfn1	0	1.19635	92.5622	107.161	0	0	125.518	137.523	8.38948	1.82578e-10	9.46973	2.34133e-10
Ankfy1	1477.83	1514.57	2233.21	2171.39	1397.54	1270.4	2890.14	2826.99	0.566062	3.90962e-12	1.13558	3.88249e-75
Ankle1	103.689	94.5114	11.7167	10.7856	165.231	167.184	12.8737	22.1811	-3.1567	4.12685e-15	-3.21511	7.39995e-21
Ankrd10	1392.29	1528.93	228.476	226.151	1040.42	952.046	290.731	240.665	-2.67392	1.03724e-109	-1.86983	9.51465e-62
Ankrd13b	726.869	685.507	65.6137	73.7599	431.733	383.421	102.989	80.9612	-3.31068	2.24484e-86	-2.11018	2.91709e-32
Ankrd13d	75.4101	70.5844	26.9485	23.6588	128.987	152.167	31.1114	51.0166	-1.54619	3.67572e-05	-1.74444	3.41424e-09
Ankrd16	250.669	273.963	127.712	121.078	244.116	267.294	175.94	169.686	-1.06862	3.71125e-08	-0.530596	0.00200351
Ankrd29	36.6577	50.2466	29.2918	18.0921	43.7063	34.0374	6.43684	6.65434	-0.896469	0.0808406	-2.534	6.63315e-05
Ankrd37	166.531	172.274	58.5837	48.0135	573.512	530.583	71.8781	65.4344	-1.68841	1.20082e-10	-2.97094	5.72507e-64
Ankrd44	3513.9	3707.48	847.12	839.889	2891.01	2986.28	1099.63	1081.33	-2.08901	4.05412e-140	-1.39513	1.74302e-115
Ankrd46	678.691	701.059	277.687	303.39	739.809	816.897	277.857	301.664	-1.22787	1.43158e-20	-1.39155	4.28411e-34
Ankrd52	1358.78	1333.93	513.193	466.218	947.681	1007.11	801.387	817.375	-1.46138	8.54215e-41	-0.237552	0.0053235
Ankrd54	370.766	364.886	195.669	211.886	394.423	394.433	149.12	180.776	-0.836489	2.05414e-07	-1.22386	2.52489e-15
Ankrd6	34.5629	37.0867	2.34335	0.347924	20.2541	28.0308	3.21842	1.10906	-5.30954	4.09464e-07	-3.43727	0.000420804
Ankrd66	0	1.19635	12.8884	14.9607	0	0	20.3833	18.854	5.43823	0.000759756	6.72529	4.54307e-05
Anks1	487.023	478.539	775.648	774.827	378.433	383.421	978.4	1020.33	0.689271	1.18026e-09	1.42631	1.28493e-48
Ankzf1	345.629	363.689	117.167	153.087	617.219	590.649	155.557	163.031	-1.3548	2.84767e-11	-1.88765	1.96675e-43
Anln	303.386	346.94	714.721	763.693	754.734	723.795	473.108	527.911	1.20913	2.12383e-18	-0.527873	2.86619e-07
Ano3	25.8349	15.5525	364.39	376.454	0	0	252.11	252.865	4.05027	7.59822e-51	10.4109	1.99841e-12
Anpep	101.245	89.726	1817.27	1822.77	14.9241	8.0088	1847.37	1845.47	4.22999	1.43187e-235	7.37974	3.28571e-120
Antxr1	31.0717	22.7306	290.575	288.081	17.0561	11.0121	145.902	150.832	3.36341	1.50792e-38	3.44462	8.23134e-21
Antxr2	111.369	112.457	1879.36	1917.76	104.469	131.144	2455.66	2365.62	4.09503	1.962e-251	4.38585	0
Anxa1	30.3735	39.4794	3356.84	3359.9	20.2541	22.0242	2217.49	2190.39	6.68615	0	6.73737	3.38117e-181
Anxa2	2818.8	2782.7	9692.08	9484.76	6044.26	6196.81	8402.22	8452.12	1.78255	1.12893e-165	0.496385	1.22435e-33
Anxa3	311.765	338.566	844.777	826.668	79.9506	93.1023	332.57	218.484	1.37833	5.38764e-29	1.70614	8.85803e-07
Anxa4	249.621	257.214	5641.61	5475.98	440.261	458.504	6056	6097.6	4.46863	0	3.79175	0
Anxa5	1028.51	1008.52	10420.9	10587.3	1047.89	993.091	8286.36	8534.2	3.37232	0	3.07862	0
Anxa9	25.8349	45.4612	70.3004	69.9328	31.9802	50.055	62.2228	70.9797	1.04095	0.0149681	0.729976	0.0456918
Aoah	9.07714	14.3562	1628.63	1514.17	0	1.0011	1996.49	2072.83	7.24659	4.59804e-164	11.979	1.76507e-16
Aoc2	82.3925	116.046	24.6051	34.0966	54.3664	72.0792	24.6746	24.3993	-1.69145	1.21816e-05	-1.33193	0.00107333
Aox1	0	0	82.0171	65.4097	1.06601	0	102.989	73.1978	9.2744	1.47057e-09	7.45004	7.33676e-07
Ap1m2	42.5927	20.3379	9.37339	6.61056	33.0462	33.0363	8.58246	13.3087	-2.0551	0.00367058	-1.5617	0.00792818
Ap1s2	231.816	242.858	1205.65	1381.26	230.258	222.244	1407.52	1510.54	2.46448	2.14331e-77	2.72442	1.56691e-158
Ap1s3	275.805	265.589	85.5322	103.333	394.423	394.433	194.178	165.25	-1.48932	1.58734e-12	-1.09791	3.55094e-13
Ap2s1	1275.34	1305.21	2602.29	2710.33	1452.97	1488.64	2255.04	2093.9	1.05292	2.6263e-38	0.599292	3.41402e-21
Ap3d1	1201.67	1142.51	1848.9	1966.82	984.991	1095.2	2040.48	2050.65	0.710106	2.16833e-14	1.00992	6.08256e-50
Ap3m2	104.038	101.689	215.588	208.754	155.637	141.155	260.692	280.591	1.0467	4.58966e-07	0.902727	1.90621e-07
Ap4e1	313.859	230.895	118.339	117.25	354.981	343.377	192.032	178.558	-1.21626	3.26121e-07	-0.878328	9.92965e-09
Ap5b1	113.464	139.973	32.8069	53.2324	160.967	156.172	104.062	69.8706	-1.49151	2.45581e-05	-0.829078	0.000601121
Ap5m1	665.773	747.717	374.936	282.514	767.526	734.807	426.977	389.279	-1.10882	9.67605e-10	-0.844145	1.46185e-15
Apba1	1.7456	1.19635	134.742	142.301	0	1.0011	182.377	174.122	6.43609	1.68717e-21	8.4667	1.03022e-08
Apbb1	34.2138	28.7123	5.85837	14.2649	103.403	109.12	5.36403	7.7634	-1.54652	0.0198172	-3.98578	6.84859e-15
Apbb1ip	1016.29	1036.04	1575.9	1543.74	1164.08	1210.33	2407.38	2385.58	0.612481	5.703e-12	1.04814	1.32209e-64
Apbb2	27.9297	32.3014	164.034	158.305	42.6403	30.033	133.028	121.996	2.45499	1.41645e-17	1.8509	7.24108e-10
Apeh	1041.08	940.328	455.781	483.615	853.872	928.019	550.35	525.693	-1.06857	2.28425e-18	-0.692838	5.25693e-13
Apex1	1329.1	1354.26	530.768	536.847	958.341	972.068	430.196	460.259	-1.31947	1.38124e-40	-1.08168	1.6968e-29
Apex2	251.367	232.091	66.7854	92.5478	185.485	172.189	83.6789	92.0517	-1.56114	3.13613e-10	-0.990246	7.42115e-06
Aph1b	27.5805	38.2831	140.601	154.478	81.0166	93.1023	89.043	120.887	2.23275	9.90965e-13	0.302467	0.270903
Aph1c	6.98241	3.58904	942.025	955.052	6.39605	11.0121	799.241	727.542	7.27344	2.07785e-105	6.47856	3.39763e-69
Apip	124.985	141.169	455.781	465.522	252.644	196.216	327.206	349.353	1.8188	8.12641e-28	0.628966	6.18041e-05
Apln	15.3613	11.9635	15.2318	8.6981	66.0925	72.0792	12.8737	2.21811	-0.26184	0.741589	-3.15378	0.00117557
Aplp1	19.8999	21.5342	11.7167	6.61056	136.449	128.141	6.43684	12.1996	-1.24164	0.0802677	-3.79824	4.78479e-18
Aplp2	785.172	795.57	3320.52	3269.44	534.07	572.629	2536.12	2482.07	2.0685	8.63039e-146	2.21519	2.89748e-210
Apmap	401.838	413.936	861.18	851.37	422.139	381.419	822.843	806.285	1.08039	2.46088e-21	1.05588	1.235e-24
Apobec1	86.2328	105.278	2254.3	2204.8	26.6502	22.0242	3056.43	3207.39	4.59835	6.2822e-259	7.0469	2.57014e-228
Apobec3	4316.88	4292.49	1843.04	1658.9	3603.11	3734.1	2683.09	2648.43	-1.29439	7.66639e-49	-0.425688	1.69503e-16
Apobr	78.203	59.8173	544.828	513.884	75.6866	88.0968	937.633	933.826	2.89705	2.29775e-49	3.54678	9.39193e-128
Apod	0	0	342.129	313.828	0	0	131.955	139.741	11.4344	1.19865e-14	9.51655	1.8529e-10
Apoe	49.9243	37.0867	15501.2	14721.7	58.6304	39.0429	8646.82	8565.25	8.35245	0	7.50517	0
Apol10b	5.58593	7.17808	262.455	251.201	12.7921	4.0044	296.095	303.882	5.4231	6.31939e-45	5.21549	1.5746e-38
Apol6	0	0	453.438	490.573	0	0	809.969	829.575	11.9665	5.36659e-16	12.1099	1.58867e-16
Apol7c	6.98241	5.98173	7.03004	10.4377	1.06601	0	9.65526	5.54529	0.454951	0.63671	3.91101	0.0384137
Apol7e	77.8539	66.9954	9.37339	9.39395	111.931	115.126	23.6018	27.7264	-2.9493	1.18021e-10	-2.1115	3.22174e-10
Apol9a	0	0	1163.47	1500.94	0	1.0011	800.314	817.375	13.4642	6.47789e-20	10.6482	2.94029e-13
Apol9b	0.349121	0	1362.66	1649.86	3.19802	1.0011	952.653	902.773	12.3206	2.60142e-22	8.84647	2.28093e-33
Apold1	6.63329	19.1415	1410.69	1404.57	59.6964	82.0902	922.614	990.388	6.88326	2.26717e-24	3.7833	1.47451e-129
App	171.767	169.881	8331.77	8286.86	46.9043	53.0583	10830	10654.7	5.60857	0	7.78019	0
Appl2	269.87	281.141	922.107	876.769	618.285	631.694	800.314	807.394	1.71762	2.59055e-44	0.397997	1.92779e-05
Aptx	214.011	244.055	355.017	401.504	175.891	177.195	328.279	383.734	0.751149	1.52016e-05	1.04627	2.35216e-11
Aqp3	17.1069	20.3379	0	1.73962	55.4324	68.0748	0	0	-3.95482	0.000398859	-8.23153	7.25443e-08
Aqr	1851.74	1816.05	656.137	660.012	1708.81	1671.84	900.085	909.427	-1.47094	5.99189e-59	-0.866483	2.49512e-35
Ar	300.244	336.173	94.9056	67.1494	531.938	503.553	55.786	60.9981	-2.00267	1.21802e-16	-3.11379	1.30615e-62
Arap1	1297.33	1213.1	2348.03	2388.85	878.39	904.994	3276.35	3277.26	0.920211	5.33455e-26	1.91245	6.50334e-213
Arap2	2968.92	2994.46	661.996	629.395	2728.98	2668.93	683.378	628.835	-2.20468	1.83755e-144	-2.00456	7.33442e-184
Arap3	9.42626	5.98173	38.6652	28.8777	23.4522	17.0187	31.1114	37.7079	2.04663	0.00103748	0.803211	0.114877
Arc	10.8227	10.7671	45.6953	48.0135	17.0561	20.022	42.9123	38.817	2.12779	1.94602e-05	1.17415	0.0153691
Areg	3.14209	1.19635	144.116	104.377	0	0	80.4605	63.2163	5.56442	3.25015e-20	8.59834	1.52536e-08
Arf2	169.324	155.525	2005.9	2143.56	170.561	182.2	2303.32	2315.71	3.6675	1.28612e-210	3.74475	0
Arf4	2072.73	2267.08	8834.42	8541.19	1811.15	1891.08	8098.62	8049.54	2.01319	1.06182e-140	2.15964	0
Arf6	2723.84	2572.14	3123.68	3120.53	1726.93	1855.04	3714.06	3697.6	0.243308	0.00216749	1.08361	6.38467e-85
Arfgap3	152.915	150.74	452.266	402.2	212.136	208.229	510.656	540.111	1.49173	1.50325e-18	1.35684	5.84222e-25
Arfgef3	17.1069	15.5525	574.12	555.635	104.469	123.135	479.545	417.006	5.08758	4.11667e-96	2.01142	8.48817e-35
Arg1	6.28417	11.9635	1266.58	1249.4	6.39605	9.0099	557.86	596.673	7.3653	8.58033e-132	6.25525	1.29033e-56
Arg2	2.44384	3.58904	273	268.597	0	1.0011	239.236	248.429	6.64183	2.37383e-38	8.91834	1.38824e-09
Arhgap10	167.229	181.845	466.326	449.518	253.71	242.266	579.316	596.673	1.40837	2.8381e-19	1.28106	1.70071e-25
Arhgap11a	953.448	1059.96	447.579	464.131	1497.74	1477.62	524.603	511.275	-1.12661	6.95228e-21	-1.48682	7.33694e-74
Arhgap17	469.218	477.342	1413.04	1361.78	445.591	431.474	1704.69	1773.38	1.5597	5.2306e-53	2.02293	2.22873e-136
Arhgap18	378.098	404.365	870.553	829.103	773.922	761.837	817.479	879.482	1.1315	5.35721e-21	0.178907	0.0482902
Arhgap19	570.812	631.671	521.395	525.713	1269.62	1353.49	639.393	634.381	-0.183938	0.16247	-1.0074	1.0054e-34
Arhgap20	2.09472	5.98173	43.3519	37.9237	8.52806	5.0055	10.7281	13.3087	3.58887	9.01208e-07	0.867824	0.329935
Arhgap22	1.7456	4.78539	71.4721	67.1494	0	1.0011	61.15	53.2347	4.73077	9.52288e-13	6.82748	7.57106e-06
Arhgap23	92.8661	88.5296	227.305	264.77	24.5182	27.0297	198.469	212.939	1.45027	2.42708e-11	3.02987	1.65368e-26
Arhgap24	6.63329	11.9635	49.2103	35.8362	19.1881	16.0176	39.6939	43.2532	2.28791	0.00012105	1.2731	0.00901941
Arhgap25	245.781	226.109	845.948	781.438	414.677	387.426	925.832	988.17	1.77944	5.01795e-39	1.29033	6.17785e-39
Arhgap26	155.01	148.347	315.18	332.615	307.01	290.319	363.682	328.281	1.10041	2.6852e-10	0.24828	0.0805942
Arhgap27os2	3.84033	0	24.6051	24.7026	7.46205	4.0044	31.1114	33.2717	3.32322	0.000630014	2.53282	0.000203892
Arhgap27os3	119.748	113.653	8.20171	4.17509	91.6767	85.0935	13.9465	7.7634	-4.43303	3.81883e-20	-2.98493	4.92991e-11
Arhgap28	0.698241	0	19.9184	16.7004	0	1.0011	28.9658	15.5268	5.14928	0.000134303	5.46777	0.000797271
Arhgap29	17.456	26.3196	199.184	265.118	52.2344	51.0561	174.868	194.085	3.50958	6.81138e-26	1.87174	2.13658e-14
Arhgap31	122.192	129.205	929.137	884.075	56.4984	61.0671	787.44	800.739	2.86685	3.4485e-93	3.78949	5.75411e-112
Arhgap32	5.23681	15.5525	100.764	114.467	13.8581	11.0121	95.4798	78.7431	3.58775	1.58118e-11	2.84779	4.26998e-11
Arhgap33	59.0014	47.8539	4.68669	1.73962	101.271	107.118	5.36403	13.3087	-4.34114	1.02701e-09	-3.45342	7.58478e-14
Arhgap42	0.349121	0	133.571	146.824	0	0	105.135	115.342	8.89761	8.4039e-12	9.21507	8.0802e-10
Arhgap45	4519.72	4396.57	856.493	838.497	4407.94	4367.8	1253.04	1290.94	-2.39013	5.7251e-204	-1.75145	2.55353e-218
Arhgap5	92.517	123.224	821.343	772.044	213.202	206.227	667.286	714.233	2.9358	1.32999e-60	1.75503	3.32451e-46
Arhgap6	11.8701	2.39269	33.9785	45.2301	7.46205	7.0077	30.0386	24.3993	2.32679	0.00184503	1.94827	0.00376959
Arhgdig	200.744	178.256	4.68669	3.47924	188.683	175.192	9.65526	11.0906	-5.63894	1.82685e-32	-4.09847	9.45025e-25
Arhgef1	6054.1	5606.08	1565.36	1482.85	5791.62	5883.46	1982.55	1996.3	-1.9316	1.13351e-113	-1.51798	5.69468e-209
Arhgef10	86.5819	81.3516	209.73	224.759	181.221	191.21	229.581	271.719	1.37497	2.53075e-10	0.462574	0.00747751
Arhgef10l	30.3735	26.3196	970.146	1010.02	24.5182	10.011	1277.71	1155.64	5.09093	1.92288e-156	6.18216	8.62985e-37
Arhgef11	55.5102	61.0137	522.566	541.022	100.205	102.112	698.397	734.196	3.22143	2.33539e-69	2.85858	1.34076e-85
Arhgef12	409.519	384.027	1145.9	1203.12	260.106	284.312	1059.93	1087.99	1.56838	3.25594e-44	2.01402	4.33654e-84
Arhgef17	10.8227	17.9452	12.8884	2.43547	53.3004	44.0484	3.21842	2.21811	-0.993938	0.3544	-4.12264	1.97474e-07
Arhgef18	326.079	379.242	188.639	163.176	757.932	729.802	164.139	186.322	-1.00084	1.2304e-07	-2.05141	5.74894e-58
Arhgef25	85.8837	90.9223	112.481	124.209	247.314	221.243	81.5333	86.5065	0.443553	0.0888846	-1.444	3.16247e-12
Arhgef37	0.349121	0	70.3004	83.8497	0	0	161.994	163.031	8.03992	1.69596e-09	9.77527	5.14884e-11
Arhgef39	71.9189	74.1735	55.0687	60.1909	168.429	171.188	43.9851	35.4898	-0.321491	0.325323	-2.05866	2.79028e-14
Arhgef4	85.8837	74.1735	4.68669	11.8294	95.9407	121.133	11.8009	13.3087	-3.11449	1.21932e-09	-3.07895	1.56492e-13
Arhgef40	48.8769	58.621	167.549	144.389	82.0826	88.0968	121.227	103.142	1.56169	1.40078e-08	0.43408	0.0945039
Arhgef5	77.1557	69.3881	19.9184	25.7464	95.9407	103.113	5.36403	15.5268	-1.64328	2.73892e-05	-3.22621	1.27735e-12
Arhgef6	1878.97	1927.31	601.068	601.561	2720.45	2659.92	949.434	970.425	-1.65298	2.52274e-73	-1.45159	5.93297e-117
Arhgef9	11.8701	22.7306	19.9184	14.6128	173.759	201.221	28.9658	27.7264	0.0357554	0.962194	-2.69085	1.52708e-20
Arid1a	2298.96	2206.06	882.27	888.598	1947.6	1955.15	1153.27	1173.38	-1.34017	1.32796e-53	-0.711229	2.12163e-28
Arid3a	463.981	521.607	149.974	155.522	491.43	486.534	201.688	222.92	-1.67045	1.86156e-24	-1.1691	5.69267e-18
Arid3b	251.018	267.982	60.927	50.1011	276.096	254.279	86.8974	89.8336	-2.24711	5.13129e-22	-1.55005	3.35135e-15
Arid5a	2730.82	2520.7	2336.32	2406.24	1285.61	1207.33	2527.53	2445.47	-0.140689	0.117002	1.0321	1.58318e-61
Arid5b	246.479	264.393	933.824	1006.54	228.126	229.252	958.017	914.972	1.94597	8.30583e-53	2.06913	4.62402e-77
Arl1	1050.15	896.064	1814.92	2222.54	902.909	925.016	1724	1656.93	1.05874	1.57437e-13	0.922276	1.10037e-39
Arl10	61.4452	58.621	89.0472	72.7161	42.6403	41.0451	90.1158	87.6155	0.415791	0.20251	1.12231	0.00041548
Arl11	8.3789	11.9635	222.618	250.157	10.6601	8.0088	284.294	283.919	4.66232	2.16714e-40	4.96867	2.47109e-38
Arl14ep	1310.95	1357.85	358.532	399.765	1072.4	1019.12	390.502	435.859	-1.79388	1.55167e-55	-1.30498	6.54367e-41
Arl4d	6.98241	7.17808	114.824	113.075	69.2905	68.0748	122.3	133.087	4.02291	6.16903e-21	0.929603	0.000278155
Arl5a	3247.87	3191.85	1295.87	1275.14	2702.33	2718.99	2050.13	2011.83	-1.3185	1.39147e-65	-0.381286	8.67436e-12
Arl5b	229.721	256.018	1086.14	1035.07	295.284	308.339	1078.17	988.17	2.14773	2.80401e-64	1.8103	5.7186e-68
Arl5c	41.8945	57.4246	592.867	558.07	528.74	516.567	578.243	548.983	3.61032	4.32057e-67	0.144436	0.189865
Arl6	99.4994	107.671	205.043	237.632	134.317	127.14	177.013	197.412	1.12247	2.82646e-07	0.553236	0.00561952
Arl8a	655.299	684.31	1995.36	1985.6	372.037	377.415	2262.55	2144.92	1.58361	1.01531e-68	2.59116	3.09443e-225
Arl8b	1669.15	1825.62	3961.43	3852.56	1749.32	1599.76	3777.35	3768.58	1.17285	2.09993e-43	1.20778	2.70372e-99
Armc10	776.095	819.497	504.991	520.495	931.691	903.993	423.759	455.823	-0.623554	5.93422e-08	-1.02655	9.51308e-26
Armc2	3.84033	3.58904	26.9485	19.8317	6.39605	4.0044	36.4754	24.3993	2.62798	0.000688874	2.59231	0.000289041
Armc3	1.39648	3.58904	24.6051	28.5298	3.19802	3.0033	15.0193	22.1811	3.68131	2.48402e-05	2.61935	0.00441642
Armc5	417.199	370.867	628.017	624.524	241.984	295.324	597.553	591.127	0.665662	7.84272e-07	1.17868	5.50032e-21
Armc6	363.085	351.726	92.5622	79.6746	192.947	197.217	85.8246	98.7061	-2.07158	1.4408e-26	-1.04612	9.13325e-07
Armcx1	61.7944	65.7991	4.68669	6.26263	128.987	102.112	3.21842	6.65434	-3.4592	5.1098e-11	-4.52006	1.43993e-15
Armcx2	131.968	128.009	110.137	113.423	247.314	254.279	85.8246	104.251	-0.209799	0.38901	-1.36628	5.30688e-12
Armcx3	84.4872	65.7991	147.631	247.026	86.3466	72.0792	207.052	209.612	1.39768	3.32659e-05	1.43223	2.83552e-11
Armcx4	207.029	206.968	21.0901	16.7004	234.522	278.306	31.1114	25.5083	-3.50522	1.58016e-31	-3.14301	7.02469e-31
Armt1	513.556	551.516	110.137	122.469	509.552	546.6	131.955	138.632	-2.16644	2.9501e-39	-1.93031	5.00874e-39
Arnt	617.944	596.977	1191.59	1293.58	735.545	743.817	1404.3	1377.45	1.04115	5.6089e-22	0.94612	2.11086e-35
Arpc1b	4896.42	4598.76	9335.89	9454.84	4587.03	4619.07	9933.12	9750.83	0.991361	3.89287e-44	1.13148	3.46456e-165
Arpc3	3009.77	3029.15	7094.48	6884.37	3223.61	3220.54	6594.54	6586.69	1.21867	3.85926e-74	1.06756	1.04607e-125
Arpc5	5384.49	5365.61	8964.47	9369.94	4459.11	4543.99	9686.37	9731.98	0.778951	3.34399e-32	1.14393	2.10593e-169
Arpin	1.7456	2.39269	173.408	176.398	1.06601	1.0011	113.718	117.56	6.5292	3.67285e-26	6.84226	2.1324e-10
Arrb1	990.455	1007.32	551.858	601.909	2739.64	2802.08	836.789	871.719	-0.775881	3.40076e-12	-1.66286	1.20984e-146
Arrb2	1200.97	1152.08	1942.63	1788.68	946.615	965.06	2105.92	2061.74	0.667667	5.40937e-12	1.15942	1.15508e-69
Arrdc3	102.292	105.278	599.897	591.123	172.693	157.173	725.218	702.033	2.53289	6.22996e-59	2.14984	1.77894e-62
Arrdc4	39.1015	27.516	744.013	817.97	26.6502	20.022	930.124	876.155	4.47343	4.03774e-103	5.31557	2.87793e-111
Arsa	229.721	192.612	587.008	514.928	286.756	335.368	562.151	533.457	1.36913	1.49323e-15	0.850318	5.84631e-12
Arsb	136.855	142.365	946.712	956.443	463.713	504.554	1002	1049.17	2.78478	1.08511e-97	1.11704	3.59272e-33
Arsg	10.8227	9.57077	319.867	326.005	20.2541	24.0264	273.566	258.41	4.95391	1.02372e-57	3.61892	1.31817e-37
Arsi	0	0	41.0086	48.7094	0	0	24.6746	26.6174	8.57595	4.59945e-08	7.11131	9.73482e-06
Art2b	86.2328	65.7991	15.2318	7.65433	307.01	331.364	24.6746	16.6359	-2.86107	2.02278e-08	-3.91115	2.39293e-42
Art3	2.44384	5.98173	799.081	766.825	1.06601	2.0022	548.204	530.129	7.90465	8.65863e-71	8.47882	2.6819e-23
Art4	40.1489	37.0867	0	0	104.469	99.1089	0	1.10906	-8.35703	1.2853e-07	-7.50857	5.80041e-07
Art5	0.349121	1.19635	86.7038	97.0708	1.06601	2.0022	35.4026	56.5619	7.39643	1.34868e-11	4.92717	4.20097e-07
Arvcf	20.249	14.3562	22.2618	19.8317	53.3004	47.0517	19.3105	16.6359	0.243542	0.697675	-1.44429	0.00178153
Arxes2	50.6225	55.0319	4.68669	6.61056	61.8285	57.0627	11.8009	6.65434	-3.13363	1.51143e-08	-2.64737	3.98391e-07
Asah1	731.059	789.589	5534.99	5637.76	537.268	583.641	7082.67	7045.84	2.89399	9.39958e-274	3.68974	0
Asah2	51.6699	51.4429	342.129	334.355	39.4423	46.0506	507.438	485.767	2.71906	1.97179e-39	3.57076	4.82921e-69
Asap1	345.28	342.155	827.201	800.921	677.981	704.774	974.109	932.717	1.24869	8.88386e-26	0.49861	1.16791e-08
Asap2	41.1962	45.4612	121.854	114.815	41.5743	45.0495	82.6061	55.4529	1.46817	5.06147e-07	0.708525	0.0476519
Asb11	1.04736	3.58904	17.5751	8.35018	0	0	19.3105	13.3087	2.68663	0.0210748	6.45968	0.000129761
Asb16	21.2964	9.57077	0	0	46.9043	63.0693	0	2.21811	-7.05989	8.86183e-05	-5.62038	6.33206e-07
Asb2	663.329	610.137	39.8369	36.532	111.931	115.126	41.8395	80.9612	-4.07867	3.16274e-95	-0.855055	0.00495344
Asb4	0	1.19635	9.37339	12.1773	0	0	5.36403	8.87246	5.03921	0.00317313	5.2609	0.00686959
Ascc1	476.55	478.539	244.88	262.335	608.69	555.61	213.489	214.048	-0.897245	4.93402e-10	-1.40966	2.12132e-27
Asf1b	627.719	614.922	308.15	258.16	1035.09	971.067	301.459	289.464	-1.143	5.43727e-14	-1.72761	9.35397e-61
Asgr2	1.7456	0	26.9485	23.3109	1.06601	1.0011	21.4561	13.3087	4.35491	2.07773e-05	4.10977	0.00149636
Asns	242.639	256.018	936.167	917.476	610.822	667.733	636.175	622.181	1.90884	7.64779e-55	0.0115638	0.916591
Aspa	0.698241	0	113.652	91.504	0	0	80.4605	86.5065	7.58198	5.69703e-12	8.81407	5.41936e-09
Asph	365.878	345.744	2514.41	2389.89	422.139	450.495	3057.5	3120.89	2.78278	3.88658e-170	2.85787	0
Aspm	587.57	608.94	196.841	180.573	1434.85	1485.63	211.343	196.303	-1.66649	2.1918e-30	-2.80522	6.43614e-157
Aspn	6.63329	3.58904	71.4721	78.2829	0	4.0044	18.2377	13.3087	3.73498	9.02018e-13	2.98422	0.00661424
Asrgl1	304.782	289.516	96.0772	101.594	559.654	582.64	130.882	92.0517	-1.57558	2.71373e-16	-2.31962	8.61214e-49
Ass1	982.076	770.447	1285.33	1578.88	381.631	404.444	1647.83	1648.06	0.713386	1.96803e-05	2.10228	4.98166e-137
Asxl1	1639.82	1644.98	704.176	647.139	2493.39	2542.79	798.168	781.885	-1.28065	1.11819e-37	-1.6372	8.7956e-135
Atad2	2416.26	2338.86	971.317	945.658	2758.83	2719.99	1072.81	1049.17	-1.3062	6.88278e-53	-1.33311	1.32542e-103
Atad3a	1388.1	1415.28	455.781	415.769	909.305	781.859	503.146	512.384	-1.68675	2.79195e-54	-0.699843	1.08578e-11
Atad5	830.907	778.822	188.639	213.625	1069.21	1041.14	313.26	277.264	-1.97944	2.37172e-44	-1.80126	5.94956e-67
Atcay	41.5454	40.6758	3.51502	2.08754	70.3565	79.0869	2.14561	6.65434	-4.02175	2.62286e-08	-4.06173	1.02171e-10
Atf3	760.036	772.84	5717.77	5700.39	248.38	248.273	7242.52	7109.06	2.90691	0	4.88802	0
Atf4	2607.58	2464.47	9217.56	9106.22	2320.7	2425.66	7590.11	7519.41	1.85826	9.65585e-151	1.70535	1.50602e-289
Atf5	152.217	126.813	608.099	592.863	116.195	101.111	340.08	377.079	2.08632	3.24408e-37	1.75901	2.32002e-24
Atf6	616.198	562.283	2198.06	2138.69	591.634	582.64	2939.49	3112.01	1.87755	2.92381e-80	2.40067	1.56361e-263
Atg10	65.9838	66.9954	159.348	193.446	62.8945	65.0715	183.45	146.396	1.4293	2.0197e-08	1.40169	1.25141e-08
Atg16l2	470.615	416.329	104.279	86.2852	610.822	564.62	135.174	168.577	-2.24417	2.11996e-30	-1.91828	1.05087e-40
Atg2b	1640.17	1496.63	347.987	354.535	1497.74	1500.65	399.084	391.497	-2.15191	5.38656e-81	-1.88794	2.2462e-104
Atg3	699.638	711.826	1477.48	1430.32	563.918	588.647	1525.53	1477.26	1.05063	2.43181e-28	1.41623	4.47805e-71
Atg4c	46.433	45.4612	345.644	344.793	51.1684	55.0605	326.133	350.462	2.91205	1.3631e-43	2.70485	5.14658e-39
Atg7	200.395	220.128	474.528	426.207	295.284	325.357	483.836	462.477	1.11092	7.64658e-12	0.642976	3.44323e-07
Atg9b	317.351	355.315	15.2318	11.8294	307.01	303.333	23.6018	14.4177	-4.70023	5.4497e-56	-3.96472	1.17285e-40
Atic	3949.6	4025.71	1179.88	1147.8	3196.96	3237.56	1207.98	1174.49	-1.77035	1.15581e-119	-1.39814	2.7299e-124
Atl1	4.18945	3.58904	84.3605	90.8082	7.46205	8.0088	80.4605	76.5249	4.4573	5.11739e-17	3.37711	1.78717e-11
Atl3	3734.54	3676.37	1241.97	1238.96	3179.9	3213.53	1839.86	1757.86	-1.57146	1.06746e-96	-0.794207	6.84069e-46
Atm	1383.91	1430.83	236.678	259.203	1125.7	1082.19	546.059	534.566	-2.4819	5.74791e-102	-0.995284	2.01459e-29
Atn1	56.2084	51.4429	164.034	147.172	43.7063	48.0528	130.882	102.033	1.51857	8.04983e-09	1.37897	2.73127e-06
Atox1	326.777	372.064	1136.52	1036.47	359.245	355.39	945.143	977.079	1.65416	1.36694e-36	1.46261	6.98475e-49
Atp10a	907.015	904.438	321.039	314.175	997.783	972.068	593.262	582.255	-1.50689	3.17056e-38	-0.709368	1.93341e-15
Atp11a	443.383	417.525	1144.72	1130.41	408.281	436.479	1159.7	1235.49	1.4024	8.25694e-38	1.53764	9.19127e-63
Atp13a2	755.846	708.237	1957.87	2052.06	684.377	626.688	2346.23	2467.65	1.45742	2.8364e-52	1.91246	3.49083e-159
Atp13a3	4697.07	5031.83	2257.81	2158.17	3544.48	3657.02	2492.13	2427.73	-1.13178	6.49215e-45	-0.514599	9.27812e-23
Atp1a1	6460.83	6253.3	21283.4	21278.3	7174.23	7033.73	18902.9	19095.7	1.75041	5.51533e-180	1.45443	0
Atp1a3	16.4087	15.5525	813.141	771	27.7162	28.0308	1133.96	1099.08	5.61828	3.05711e-125	5.35898	2.95582e-136
Atp1b1	162.341	148.347	60.927	39.6634	201.475	236.259	55.786	56.5619	-1.67412	1.09781e-07	-1.92796	1.6991e-16
Atp1b2	32.8173	16.7489	103.107	114.815	35.1783	50.055	82.6061	66.5434	2.06558	3.98869e-07	0.840082	0.0156482
Atp1b3	4866.74	4616.7	10840.3	11097.4	4535.86	4552	11541.3	11819.2	1.21684	7.75599e-70	1.3971	5.36027e-259
Atp23	101.594	95.7077	66.7854	43.1426	97.0067	97.1067	39.6939	49.9076	-0.880627	0.0123038	-1.0816	0.00048597
Atp2a3	2607.58	2515.92	255.425	273.12	3243.86	3174.49	424.832	443.623	-3.25872	3.97849e-224	-2.85081	0
Atp2b1	881.879	904.438	5905.23	5875.39	813.364	873.96	6006.65	5947.87	2.73203	1.27227e-300	2.85897	0
Atp2b4	2040.61	2162.99	137.086	151.347	1544.65	1448.59	231.726	229.575	-3.83499	3.43017e-226	-2.66238	7.39121e-151
Atp5e	1281.97	1283.68	2605.8	2573.25	1540.38	1548.7	2058.72	2075.05	1.02092	1.6369e-38	0.455326	5.69358e-14
Atp5g3	3228.32	3322.25	7954.49	7721.13	4189.41	4286.71	5349.02	5499.81	1.26765	3.63554e-79	0.390976	1.18545e-17
Atp5k	491.911	540.749	1181.05	1132.15	757.932	811.892	858.246	1005.91	1.17838	1.08371e-25	0.281901	0.00279852
Atp5mpl	579.191	657.991	2441.77	2484.18	928.493	1006.11	1725.07	1629.21	2.01347	2.19577e-86	0.828608	8.14428e-31
Atp6ap1	1639.12	1644.98	5059.29	5155.54	992.453	997.095	4227.93	4343.07	1.64584	6.34541e-121	2.14201	1.3312e-298
Atp6ap2	1219.48	1243	6898.81	7088.26	1037.23	1023.12	6249.1	6205.17	2.51615	7.71951e-274	2.631	0
Atp6v0a1	87.9784	96.9041	1966.07	1882.27	36.2443	47.0517	1212.27	1142.33	4.41079	2.84616e-250	4.85123	3.66253e-155
Atp6v0b	888.861	953.488	4305.9	4175.44	725.951	761.837	3128.31	3232.9	2.21643	1.43784e-155	2.13055	9.94627e-238
Atp6v0c	939.833	604.155	3732.95	5811.72	471.175	427.47	3970.46	3974.86	2.63403	6.25261e-09	3.1809	0
Atp6v0d1	983.124	1009.72	2887	2783.05	950.879	1068.17	2732.44	2700.55	1.51757	5.23923e-75	1.46211	2.7394e-110
Atp6v0d2	38.4033	35.8904	141.772	123.165	21.3202	17.0187	82.6061	70.9797	1.82171	8.30392e-10	2.04079	3.3208e-07
Atp6v0e	1507.15	1543.29	2685.48	2689.8	1171.54	1161.28	2296.88	2353.42	0.827024	8.63763e-27	1.03036	5.61092e-62
Atp6v0e2	2.79297	3.58904	717.064	746.645	1.06601	1.0011	462.38	439.187	7.94863	5.12541e-66	8.80539	3.42812e-17
Atp6v1a	3093.21	3313.88	6307.12	6519.75	2264.2	2259.48	6067.8	6057.67	1.01261	3.26899e-41	1.45762	1.78685e-206
Atp6v1b2	1500.87	1429.63	9435.49	9580.79	951.945	937.029	7648.04	7587.06	2.70238	0	3.04708	0
Atp6v1c1	1166.06	1231.04	3593.52	3564.48	906.107	883.971	3134.74	3041.03	1.59036	1.66095e-89	1.82212	6.62992e-187
Atp6v1d	1335.39	1435.62	3438.86	3461.15	997.783	1153.27	2825.77	2747.13	1.32924	2.80037e-59	1.40735	1.95911e-96
Atp6v1e1	976.49	1009.72	4264.89	4283.29	693.971	720.792	3885.71	3529.02	2.11699	1.10085e-169	2.42479	7.57905e-273
Atp6v1f	870.358	708.237	1967.24	2124.77	677.981	770.847	1558.79	1574.86	1.37402	8.49675e-26	1.14678	3.53733e-49
Atp6v1g1	569.765	418.721	3251.39	4334.44	474.373	426.468	2131.67	2229.2	2.94399	4.33329e-22	2.31168	2.32432e-191
Atp6v1h	774	827.872	3208.04	3265.96	865.598	767.843	2809.68	2780.41	2.03005	6.51495e-125	1.81142	1.10283e-159
Atp7a	113.813	133.991	521.395	559.81	111.931	94.1034	1036.33	1031.42	2.16153	5.57213e-37	3.36523	3.14558e-136
Atp7b	16.4087	20.3379	7.03004	6.61056	150.307	163.179	4.29123	2.21811	-1.41412	0.0546782	-5.54785	7.14197e-18
Atp8a1	275.107	299.087	965.459	965.142	332.594	338.372	1460.09	1575.97	1.76846	2.28753e-48	2.21251	7.70088e-130
Atp8b1	0	0	57.412	34.7924	0	4.0044	9.65526	16.6359	8.58824	6.28017e-08	2.72058	0.0194684
Atp8b2	1228.56	1166.44	504.991	516.667	1466.83	1593.75	716.635	757.486	-1.22161	8.93143e-31	-1.01964	4.72211e-39
Atp9a	34.5629	37.0867	277.687	295.736	42.6403	40.044	210.27	208.503	3.0277	1.13757e-37	2.37656	1.17858e-21
Atr	834.398	893.671	312.837	254.68	1755.71	1677.84	365.827	368.207	-1.61438	1.71935e-26	-2.19045	1.94593e-141
Atrip	350.517	337.37	121.854	118.642	313.406	284.312	129.81	144.177	-1.51486	1.18622e-17	-1.09026	3.21874e-10
Atrnl1	114.861	126.813	362.047	360.101	123.657	130.143	283.221	300.554	1.60138	1.69136e-19	1.23602	1.28163e-12
Atxn1	839.286	908.027	331.584	375.41	862.4	872.959	435.56	433.641	-1.2822	3.49439e-22	-0.962396	1.40366e-22
Atxn7	379.494	405.561	506.163	475.264	320.868	344.378	701.616	676.525	0.331382	0.0171148	1.0853	1.62819e-22
Atxn7l1	313.51	254.822	724.094	692.021	408.281	428.471	920.468	975.97	1.30523	5.04773e-17	1.21479	1.35044e-35
Atxn7l2	131.269	113.653	67.9571	57.7554	222.796	182.2	76.1693	75.4159	-0.984166	0.000551124	-1.38138	8.17582e-10
Atxn7l3b	940.88	1003.73	2407.79	2349.88	1059.61	987.084	1817.34	1821.07	1.30312	1.4227e-49	0.865798	3.88591e-37
AU022252	402.536	407.954	247.223	234.849	501.024	504.554	200.615	209.612	-0.74633	7.16011e-07	-1.25874	7.92296e-21
AU022793	2.79297	2.39269	55.0687	49.7532	0	0	25.7474	27.7264	4.2927	1.1967e-10	7.17141	7.61219e-06
AU041133	57.954	56.2283	31.6352	20.5275	37.3103	53.0583	28.9658	34.3808	-1.1779	0.00724158	-0.480677	0.270296
Aunip	157.803	144.758	35.1502	27.8339	304.878	294.323	42.9123	56.5619	-2.30399	2.11682e-14	-2.55762	9.45961e-31
Aurka	779.936	734.557	413.601	398.721	1111.85	1100.21	310.041	327.172	-0.898112	1.90708e-13	-1.76073	6.24446e-70
Aurkb	983.822	972.63	336.27	333.311	2140.54	2100.31	363.682	409.242	-1.54082	5.40809e-42	-2.42167	1.58331e-191
Aven	764.923	782.411	324.554	286.689	579.908	595.654	283.221	282.81	-1.34407	6.79917e-24	-1.01944	1.86801e-17
Avl9	896.542	958.274	1039.27	1102.57	705.697	669.736	1416.11	1435.12	0.223187	0.0368871	1.08732	7.44181e-45
AW011738	10.4736	13.1598	228.476	215.017	4.26403	0	391.575	389.279	4.30308	9.23129e-39	7.59703	1.98626e-24
AW146154	93.2152	105.278	29.2918	39.6634	97.0067	112.123	45.0579	47.6895	-1.4694	1.84975e-05	-1.13917	0.00014921
AW209491	286.279	294.301	112.481	96.7229	152.439	179.197	121.227	108.688	-1.48352	9.2409e-14	-0.493917	0.0232336
AW549877	641.335	685.507	793.223	781.786	530.872	603.663	1148.98	1133.46	0.259647	0.0222503	1.0424	9.2624e-32
Axin2	30.0244	23.9269	149.974	115.163	73.5545	73.0803	142.683	159.704	2.25451	4.14753e-11	1.07888	7.01045e-06
Axl	776.095	769.251	4208.65	4129.51	473.307	438.482	4734.3	4659.15	2.4381	3.47795e-212	3.40125	0
AY036118	17.1069	28.7123	52.7253	50.449	30.9142	38.0418	55.786	39.9261	1.24099	0.00882003	0.507855	0.225036
Azgp1	0	1.19635	128.884	129.776	0	0	83.6789	94.2699	8.7614	1.7045e-11	8.90582	3.5389e-09
Azi2	832.304	793.178	1652.06	1732.31	733.413	689.758	1937.49	1958.59	1.06398	5.79248e-29	1.4887	4.04516e-97
Azin1	2419.06	2427.39	4294.18	4031.05	2113.89	2179.39	5470.24	5496.49	0.787209	3.92861e-24	1.38784	3.83059e-176
Azin2	91.4696	102.886	24.6051	16.0045	9.59407	9.0099	12.8737	11.0906	-2.31923	3.45638e-09	0.401618	0.632843
B130046B21Rik	14.6631	11.9635	2.34335	3.47924	65.0265	45.0495	7.50965	12.1996	-2.12818	0.0259463	-2.4484	4.29522e-06
B130055M24Rik	57.6049	70.5844	19.9184	21.2234	23.4522	32.0352	20.3833	25.5083	-1.60723	9.74739e-05	-0.242154	0.660343
B230118H07Rik	40.498	51.4429	309.322	318.351	52.2344	42.0462	240.309	168.577	2.82946	1.37813e-34	2.15563	1.44812e-16
B230217C12Rik	32.4682	29.9087	76.1588	73.7599	19.1881	25.0275	62.2228	59.8891	1.25812	0.000379029	1.49785	0.000285075
B230219D22Rik	1305.36	1416.47	676.056	555.287	1377.28	1324.45	974.109	964.88	-1.14449	4.14744e-17	-0.443116	1.71688e-09
B2m	18196.9	19484.9	84161.3	81723.9	18373.7	18415.2	95557.1	95374.5	2.14705	2.84354e-221	2.41082	0
B3galnt1	1.04736	0	198.013	184.052	1.06601	1.0011	138.392	134.196	7.89908	9.78362e-19	7.07958	3.81094e-11
B3galnt2	1221.22	1332.73	195.669	191.01	666.255	672.739	263.911	269.501	-2.71604	1.75099e-104	-1.2929	3.02317e-28
B3galt1	0	0	101.936	82.1101	0	0	89.043	113.124	9.59505	2.84976e-10	9.08952	1.52418e-09
B3galt4	45.0366	63.4064	26.9485	22.963	50.1024	66.0726	54.7132	38.817	-1.10705	0.0128597	-0.277863	0.466098
B3galt5	0.698241	3.58904	45.6953	81.4142	3.19802	3.0033	76.1693	62.1072	5.39615	5.87471e-10	4.51587	1.3179e-10
B3galt6	233.213	227.306	77.3304	100.55	124.723	127.14	81.5333	100.924	-1.33588	1.04032e-08	-0.431247	0.0829967
B3glct	96.0082	77.7625	212.073	174.31	73.5545	82.0902	134.101	151.941	1.12752	1.00617e-05	0.91145	0.000169461
B3gnt2	31.0717	21.5342	11.7167	10.0898	20.2541	14.0154	19.3105	14.4177	-1.3103	0.0365864	0.0163129	0.980817
B3gnt3	83.789	113.653	60.927	46.2739	199.343	202.222	51.4947	49.9076	-0.881087	0.011652	-1.95026	7.3445e-16
B3gnt5	95.6591	99.2968	1109.57	1066.39	182.287	192.211	1619.94	1593.72	3.49488	5.06901e-138	3.1355	3.26314e-202
B3gnt7	1.04736	0	7.03004	5.21886	0	0	9.65526	6.65434	3.12576	0.0646674	5.45967	0.00382216
B3gnt8	9.07714	8.37443	58.5837	70.9765	3.19802	8.0088	65.4412	79.8521	2.89267	2.0746e-09	3.71595	6.77539e-11
B3gnt9	28.2788	28.7123	74.9871	60.1909	58.6304	39.0429	55.786	66.5434	1.23991	0.00131212	0.362315	0.324311
B430305J03Rik	17.8052	5.98173	19.9184	11.1336	7.46205	14.0154	32.1842	36.5989	0.283526	0.753364	1.7068	0.00340584
B430306N03Rik	67.0312	56.2283	364.39	427.599	67.1585	55.0605	550.35	505.73	2.6678	2.9902e-35	3.1499	2.71426e-67
B4galnt1	4040.37	3516.06	546	574.075	3786.46	3672.03	1084.61	1081.33	-2.74418	3.09549e-138	-1.7486	3.92803e-193
B4galnt4	277.202	296.694	5.85837	8.00226	71.4225	71.0781	6.43684	6.65434	-5.26262	7.93414e-50	-3.40945	5.58337e-10
B4galt2	31.0717	32.3014	79.6738	68.5411	40.5083	37.0407	35.4026	38.817	1.22767	0.000662434	-0.0279391	0.950349
B4galt4	16.7578	10.7671	108.966	111.336	20.2541	24.0264	139.465	131.978	2.91863	5.36688e-14	2.64867	6.90084e-16
B4galt5	935.992	1020.48	3858.32	3881.09	1026.57	969.064	4284.79	4477.26	1.99934	1.13897e-121	2.17006	2.03469e-292
B4galt6	2.44384	2.39269	751.043	699.328	3.19802	2.0022	593.262	605.545	8.22441	1.17883e-58	7.89418	9.65329e-33
B630019K06Rik	2.79297	4.78539	41.0086	35.8362	8.52806	4.0044	15.0193	12.1996	3.48522	4.40376e-07	1.16214	0.183631
Bace1	4.53857	2.39269	175.751	158.653	4.26403	10.011	127.664	136.414	5.39955	2.33874e-29	4.22911	2.13563e-19
Bace2	0.698241	1.19635	2125.42	2152.26	4.26403	1.0011	1734.73	1742.33	11.3715	4.53142e-41	9.4305	4.22359e-47
Bach1	113.115	132.794	5126.07	5433.18	196.145	192.211	6381.06	6405.91	5.47311	0	5.07666	0
Bach2	1379.38	1366.23	59.7553	51.1448	1042.56	1033.13	133.028	128.651	-4.66655	4.54937e-199	-2.95224	7.21234e-119
Bach2os	1.04736	1.19635	15.2318	13.2211	1.06601	0	7.50965	9.98151	3.70109	0.00125827	4.1115	0.0251209
Bag2	252.065	252.429	55.0687	66.8014	288.888	279.307	79.3877	84.2883	-2.01084	9.76297e-19	-1.76064	2.5033e-19
Bag3	104.387	111.26	1458.73	1485.64	118.327	124.136	1121.08	1131.24	3.79478	2.72609e-191	3.24987	2.3389e-146
Bag4	634.352	677.132	296.433	256.768	605.492	625.687	242.454	250.647	-1.24832	1.44361e-17	-1.28539	8.17173e-26
Bahcc1	44.3383	40.6758	92.5622	114.119	51.1684	47.0517	101.917	127.542	1.29164	5.49451e-05	1.25925	1.36238e-05
Bahd1	519.142	504.858	819	802.661	475.439	535.588	1139.32	1143.44	0.66709	2.8157e-09	1.20883	6.27644e-41
Baiap2	152.566	143.562	431.176	465.522	188.683	180.198	355.099	304.991	1.60209	1.49521e-22	0.875747	3.44484e-08
Baiap2l1	0	2.39269	125.369	112.727	8.52806	5.0055	120.154	87.6155	7.00165	0.000211201	3.98601	3.6514e-15
Baiap3	6.98241	21.5342	17.5751	14.2649	225.994	200.22	32.1842	43.2532	0.23394	0.787311	-2.46485	4.41315e-21
Bak1	971.952	951.095	2078.55	2024.22	1040.42	981.078	2217.49	2300.18	1.09814	3.94232e-37	1.19572	5.88945e-75
Bambi	19.2016	26.3196	241.365	284.602	26.6502	33.0363	193.105	198.521	3.62068	2.52065e-35	2.74573	2.978e-23
Bank1	3.14209	4.78539	83.1888	100.898	7.46205	12.0132	107.281	107.579	4.68876	3.48013e-17	3.49073	1.85049e-15
Banp	292.563	324.21	142.944	116.207	286.756	315.346	169.504	143.068	-1.25977	8.01213e-10	-0.910299	8.66162e-08
Bard1	346.677	357.708	161.691	134.647	655.595	673.74	180.232	161.922	-1.26032	1.22244e-11	-1.92221	2.35294e-48
Basp1	398.347	418.721	5254.96	5359.08	833.618	926.017	5178.44	5129.39	3.71604	0	2.58429	0
Batf2	3.84033	14.3562	1183.39	1162.41	3.19802	4.0044	1567.37	1583.73	7.14422	9.26566e-19	8.80324	8.54854e-57
Batf3	1092.05	1026.47	224.961	225.107	311.274	333.366	253.182	230.684	-2.22985	4.16908e-73	-0.378758	0.011837
Baz1b	4348.65	4264.98	1735.25	1767.8	4038.04	4031.43	2205.69	2198.15	-1.28935	5.09635e-71	-0.838559	1.50412e-60
Baz2b	374.606	386.42	1019.36	1021.16	271.832	272.299	948.361	907.209	1.43467	1.55362e-38	1.80512	1.05601e-63
Bbc3	427.324	373.26	175.751	144.389	266.502	212.233	143.756	175.231	-1.34053	3.52911e-12	-0.550185	0.00377287
Bbip1	373.908	379.242	773.304	780.394	391.225	371.408	705.907	663.216	1.05472	2.48886e-19	0.880114	5.78426e-16
Bbs1	34.5629	29.9087	12.8884	19.1358	45.8383	44.0484	12.8737	25.5083	-0.965649	0.0804629	-1.19629	0.0140528
Bbs12	244.384	252.429	21.0901	17.7441	125.789	115.126	30.0386	42.1442	-3.71383	1.18754e-39	-1.70552	3.28073e-08
Bbs5	39.7998	44.2648	83.1888	85.5893	56.4984	78.0858	79.3877	82.0702	1.03032	0.00149502	0.295001	0.343811
Bbs7	59.0014	56.2283	141.772	149.607	35.1783	47.0517	113.718	117.56	1.34288	2.12663e-07	1.52357	3.34435e-07
Bbs9	200.046	212.95	87.8755	80.7184	293.152	326.358	80.4605	66.5434	-1.29189	5.04888e-09	-2.03931	1.9355e-24
BC002059	146.631	181.845	83.1888	70.6286	136.449	117.129	85.8246	94.2699	-1.09114	4.13172e-05	-0.457959	0.0649402
BC003965	374.257	351.726	178.094	180.573	307.01	297.327	164.139	160.813	-1.01231	7.40055e-10	-0.859639	1.57747e-07
BC005537	4387.75	4548.51	14244	14144.5	5092.32	4907.39	16890.3	17229.2	1.67694	7.43904e-158	1.80592	0
BC005561	90.7714	100.493	256.596	288.429	110.865	141.155	168.431	157.486	1.53987	1.12525e-13	0.404353	0.0621963
BC024978	99.1503	110.064	132.399	112.032	60.7624	54.0594	153.411	154.159	0.22853	0.393904	1.45799	6.63478e-09
BC025920	40.498	41.8721	11.7167	5.56679	51.1684	52.0572	1.07281	18.854	-2.37342	0.000100859	-2.34135	0.135378
BC028528	5.93505	9.57077	529.596	593.907	8.52806	12.0132	845.372	797.412	6.36636	1.02219e-77	6.34947	1.19312e-77
BC030867	241.941	238.073	91.3905	131.863	586.304	559.615	131.955	128.651	-1.06648	1.86166e-05	-2.10096	2.71622e-47
BC031181	1062.72	1009.72	1566.53	1672.82	602.294	611.672	1373.19	1355.27	0.651788	1.8059e-11	1.20338	3.45598e-51
BC035044	246.479	233.288	93.7339	73.7599	195.079	173.19	95.4798	124.214	-1.54428	2.53488e-11	-0.710826	0.000991609
BC037032	4.18945	1.19635	18.7468	23.3109	1.06601	0	18.2377	17.7449	2.77331	0.00185765	5.15545	0.00183754
BC043934	54.1137	47.8539	87.8755	72.0203	29.8482	46.0506	80.4605	78.7431	0.62738	0.0626331	1.09969	0.00150598
BC049352	0	0	9.37339	6.26263	0	0	15.0193	9.98151	6.02936	0.00256942	6.07603	0.000520426
BC049715	32.4682	39.4794	33.9785	38.9675	20.2541	22.0242	56.8588	41.0351	0.0611381	0.895176	1.24685	0.00577564
BC051226	32.1191	28.7123	62.0987	64.018	27.7162	29.0319	50.4219	56.5619	1.04645	0.00550436	0.948921	0.0197039
BC055324	410.217	429.488	84.3605	77.5871	606.558	618.68	116.936	94.2699	-2.37925	9.2556e-39	-2.49953	4.44298e-60
Bc1	313.161	399.58	835.403	1123.1	592.7	589.648	300.386	429.205	1.4827	6.38741e-14	-0.662068	0.00880374
BC147527	33.8647	33.4977	324.554	319.046	101.271	107.118	420.54	428.096	3.25995	4.44909e-46	2.06017	2.44508e-36
Bcam	108.577	129.205	71.4721	73.0641	93.8087	98.1078	13.9465	9.98151	-0.693782	0.0119239	-2.96586	5.81836e-12
Bcap29	1725.35	1959.62	794.395	773.087	1287.74	1317.45	853.954	914.972	-1.22276	2.32377e-29	-0.523923	7.17006e-12
Bcar1	16.7578	13.1598	220.275	207.711	94.8747	117.129	193.105	159.704	3.77968	2.02664e-34	0.768812	0.00046142
Bcar3	2.79297	2.39269	52.7253	57.0596	3.19802	0	19.3105	19.963	4.36894	3.37226e-11	3.68841	0.000916159
Bcat1	998.136	994.164	335.099	335.399	614.02	615.676	311.114	331.608	-1.56337	9.50355e-44	-0.901317	6.55178e-15
Bcdin3d	133.015	139.973	65.6137	51.8407	104.469	88.0968	52.5675	57.671	-1.23558	1.04091e-05	-0.768986	0.00999302
Bckdhb	45.0366	50.2466	105.451	155.174	46.9043	85.0935	54.7132	68.7615	1.4904	7.70064e-06	-0.0658734	0.862758
Bcl10	695.797	699.863	1288.84	1243.83	652.397	628.691	1373.19	1274.31	0.866205	9.60497e-19	1.08307	8.71909e-40
Bcl11a	0.698241	4.78539	24.6051	37.2279	6.39605	5.0055	34.3298	44.3623	3.90325	6.78031e-05	2.82494	1.29524e-05
Bcl11b	2476.66	2483.62	76.1588	94.6354	1597.95	1662.83	156.63	165.25	-4.79882	1.70019e-287	-3.30619	8.44641e-198
Bcl2	6305.12	6894.54	751.043	692.021	3216.15	3214.53	658.703	676.525	-3.19125	6.80558e-257	-2.23295	1.49894e-251
Bcl2a1a	5.93505	13.1598	454.609	508.665	0	2.0022	284.294	281.701	5.94168	5.36041e-66	8.13416	1.03362e-14
Bcl2a1b	66.3329	70.5844	428.832	537.891	58.6304	47.0517	295.022	320.518	2.84611	1.58772e-41	2.58021	1.70633e-33
Bcl2a1d	31.4209	20.3379	728.781	1193.38	40.5083	57.0627	554.641	611.091	5.18516	1.72442e-26	3.60749	7.37303e-79
Bcl2l1	2290.23	2201.28	2004.73	1878.09	621.483	576.633	1835.57	1925.32	-0.206404	0.020373	1.68614	2.38071e-110
Bcl2l11	464.33	455.808	2535.5	2483.13	1067.07	1048.15	2970.6	3164.14	2.45178	7.8448e-161	1.57128	3.66025e-141
Bcl2l12	163.039	145.954	55.0687	66.8014	157.769	193.212	70.8053	65.4344	-1.31719	8.49876e-07	-1.33082	2.91526e-08
Bcl2l14	9.77538	4.78539	222.618	193.446	52.2344	44.0484	270.347	321.627	4.64978	2.40255e-33	2.65722	2.02964e-32
Bcl3	834.398	729.771	842.433	893.817	385.895	430.473	911.886	868.392	0.154065	0.235397	1.15901	2.23536e-30
Bcl6	24.4384	39.4794	922.107	832.582	51.1684	72.0792	1312.04	1276.52	4.91185	2.33341e-102	4.42121	4.84067e-177
Bcl6b	5.58593	8.37443	8.20171	13.569	47.9703	32.0352	6.43684	3.32717	0.737822	0.420208	-2.99205	1.53931e-05
Bcl7a	168.276	179.452	24.6051	30.6173	173.759	178.196	28.9658	27.7264	-2.60041	3.16985e-19	-2.5988	4.7648e-19
Bcl7b	301.989	323.014	519.051	572.335	271.832	281.309	583.607	557.856	0.824538	8.25975e-09	1.08013	4.77697e-19
Bcl9l	356.801	348.137	179.266	164.916	400.819	430.473	184.523	166.359	-1.03828	6.7022e-10	-1.20903	4.75323e-16
Bco2	3.84033	2.39269	72.6438	120.73	35.1783	22.0242	110.499	102.033	4.8497	1.7017e-15	1.93469	9.54785e-09
Bcor	1341.32	1235.83	394.854	351.055	1376.22	1302.43	443.069	421.442	-1.79542	1.43943e-47	-1.59575	1.40736e-71
Bcorl1	325.031	299.087	89.0472	91.852	350.717	401.441	110.499	130.869	-1.77941	7.51718e-20	-1.6066	4.28661e-21
Bcr	967.413	984.593	302.292	248.418	739.809	701.771	271.42	311.645	-1.83692	9.15514e-38	-1.27135	5.98097e-28
Bcs1l	166.181	136.383	108.966	88.0248	244.116	243.267	90.1158	109.797	-0.643436	0.0165994	-1.25182	2.34205e-10
Bdh1	554.404	598.173	388.996	337.486	701.433	684.752	242.454	227.357	-0.664838	6.53734e-06	-1.52524	7.65717e-37
Bdh2	0.698241	0	19.9184	21.9192	0	0	15.0193	21.0721	5.34837	4.61172e-05	6.60342	7.48346e-05
BE692007	350.168	325.406	53.897	38.6196	312.34	288.317	61.15	56.5619	-2.9255	2.80887e-33	-2.31506	4.58911e-28
Bend5	18.5034	17.9452	1.17167	0	176.957	170.187	0	1.10906	-5.85072	0.000142024	-8.27868	2.53308e-08
Bend6	9.07714	11.9635	159.348	167.352	14.9241	10.011	65.4412	79.8521	4.04684	2.24594e-28	2.58287	1.26034e-08
Bet1	329.221	334.977	717.064	751.516	379.499	378.416	664.068	627.726	1.15742	7.24748e-21	0.804682	2.45708e-13
Bex3	230.07	200.986	466.326	434.557	491.43	560.616	365.827	394.824	1.05307	1.01739e-10	-0.434076	0.000355476
Bex6	0	0	50.382	78.6309	0	0	49.3491	73.1978	9.10828	4.76405e-09	8.36687	4.62245e-08
Bfsp1	0.349121	2.39269	42.1802	28.8777	0	0	31.1114	32.1627	5.27108	8.28081e-07	7.41432	2.76583e-06
Bfsp2	8.02977	11.9635	601.068	632.526	14.9241	12.0132	310.041	298.336	6.10137	1.18669e-91	4.53684	4.44148e-43
Bgn	0	0	391.339	411.594	2.13202	0	135.174	151.941	11.732	2.09445e-15	7.15282	2.23291e-11
Bhlhb9	535.9	679.525	198.013	219.888	649.199	692.761	200.615	239.556	-1.51481	7.95908e-17	-1.57465	2.03017e-35
Bhlhe41	8.3789	8.37443	1993.02	1901.41	53.3004	59.0649	1162.92	1233.27	7.8663	7.51663e-171	4.44741	9.62961e-165
Bicc1	0.698241	0	162.863	139.17	1.06601	0	21.4561	26.6174	8.13691	3.99716e-14	5.57318	0.000533299
Bicd1	18.1543	17.9452	400.712	420.64	14.9241	18.0198	323.988	297.227	4.514	3.66809e-71	4.26884	1.77874e-44
Bicdl1	1181.42	1147.3	18.7468	18.44	1026.57	1065.17	68.6596	63.2163	-5.96778	1.08668e-171	-3.95166	2.54178e-136
Bicra	264.284	192.612	80.8455	60.5388	316.604	317.349	146.975	160.813	-1.7256	2.08956e-09	-1.00789	8.27313e-10
Bid	309.67	284.73	585.837	614.434	268.634	258.284	653.339	609.981	1.01549	1.35902e-13	1.29743	2.65907e-27
Bin1	553.705	524	1224.4	1197.9	538.334	567.623	1088.9	1042.51	1.16959	5.3015e-29	0.981296	2.15464e-28
Bin2	1453.39	1508.59	458.124	426.207	1648.05	1653.82	805.678	822.92	-1.74246	4.74504e-61	-0.984673	6.01298e-43
Bin3	498.544	504.858	1427.1	1413.96	464.779	471.518	1184.38	1204.44	1.51038	4.38188e-53	1.38615	7.70699e-56
Birc3	964.969	890.082	1355.63	1302.28	520.212	529.582	1589.9	1581.52	0.519595	4.41766e-07	1.62996	5.79446e-94
Birc5	960.082	923.579	625.674	714.288	1899.63	1967.16	501.001	513.493	-0.477009	9.89425e-05	-1.89562	1.66075e-132
Birc6	3532.05	3620.14	1627.45	1693.35	2931.52	3028.33	2448.15	2443.25	-1.09552	7.94015e-47	-0.250084	3.96562e-06
Bivm	385.778	403.169	194.498	199.708	448.789	468.515	207.052	197.412	-0.986693	2.95478e-10	-1.14623	1.49975e-16
Blcap	255.905	245.251	653.794	698.98	159.901	151.166	662.995	669.871	1.43876	1.63442e-26	2.1351	1.06253e-58
Blm	686.371	691.488	189.811	191.706	1276.01	1324.45	273.566	240.665	-1.84282	1.77219e-42	-2.30234	8.16775e-112
Blnk	4.18945	1.19635	335.099	327.745	1.06601	1.0011	245.673	263.956	6.59154	2.50849e-46	7.98197	3.56741e-14
Bloc1s2	1123.47	839.835	396.026	506.925	467.977	545.599	293.949	356.007	-1.10923	1.72086e-08	-0.607814	4.74014e-06
Bloc1s4	169.673	180.648	422.974	394.198	147.109	121.133	352.953	323.845	1.23321	3.46221e-14	1.37282	4.59731e-16
Blvra	439.892	470.164	1205.65	1217.04	416.809	459.505	1169.36	1126.8	1.42844	8.61847e-41	1.4239	1.30663e-53
Blvrb	26.184	11.9635	1341.57	1290.8	74.6205	60.066	1968.6	2032.9	6.02318	1.85873e-40	4.93227	9.15644e-261
Bmf	95.3099	110.064	57.412	53.2324	289.954	279.307	74.0237	80.9612	-0.882167	0.00306708	-1.84227	1.82615e-20
Bmp1	48.8769	58.621	398.369	374.018	15.9901	21.0231	151.266	175.231	2.88743	3.45248e-43	3.1711	1.42143e-21
Bmp2	0.349121	1.19635	69.1287	100.898	0	0	19.3105	21.0721	7.28493	6.69697e-11	6.76628	3.87222e-05
Bmp2k	674.501	653.205	1292.36	1229.56	483.968	494.543	1268.06	1334.2	0.928084	7.56169e-20	1.44578	1.4959e-63
Bmp7	45.0366	35.8904	19.9184	14.2649	31.9802	41.0451	4.29123	2.21811	-1.29702	0.0112586	-3.44788	1.20494e-05
Bmpr1a	218.2	221.324	431.176	457.52	329.396	315.346	360.463	328.281	1.02928	7.21053e-12	0.131212	0.355619
Bmpr2	314.558	320.621	1014.67	1018.72	231.324	229.252	1124.3	1109.06	1.68925	2.92516e-50	2.31302	1.95161e-105
Bms1	2229.48	2194.1	863.523	810.315	1771.7	1827.01	1026.68	1040.3	-1.40008	3.54307e-54	-0.765114	5.75353e-30
Bmyc	74.7118	82.5479	82.0171	86.2852	174.825	170.187	77.2421	63.2163	0.121112	0.689425	-1.2599	9.56391e-08
Bnc2	0	0	131.227	126.992	0	0	77.2421	112.015	10.0915	1.88728e-11	8.99395	2.52676e-09
Bnip3	1589.2	1234.63	2987.77	3650.07	3480.52	3353.68	2509.3	2539.74	1.23779	2.93021e-15	-0.401492	2.70125e-14
Bnip3l	1868.84	1817.25	1534.89	1679.43	3920.78	3958.35	1319.55	1409.61	-0.186677	0.0524249	-1.49487	2.79849e-152
Boc	0	0	198.013	186.835	1.06601	1.0011	127.664	135.305	10.6661	8.62271e-13	7.02745	5.59958e-11
Bod1	173.862	196.201	537.798	579.294	142.845	154.169	296.095	346.026	1.62125	1.71666e-25	1.14599	8.23843e-12
Bola1	128.826	99.2968	89.0472	68.1931	136.449	132.145	54.7132	69.8706	-0.567755	0.0725059	-1.07449	4.25174e-05
Bop1	1925.05	1800.5	650.279	610.955	1327.18	1379.52	730.582	697.597	-1.56264	1.64532e-53	-0.887205	1.97565e-29
Bora	322.937	326.603	134.742	112.379	522.344	555.61	115.863	123.105	-1.40831	3.09893e-13	-2.1391	2.65677e-45
Borcs7	93.2152	98.1004	262.455	248.07	120.459	131.144	197.396	188.54	1.42736	1.49798e-12	0.651741	0.00101292
Bpnt1	250.669	229.699	819	864.244	204.673	219.241	756.329	808.503	1.80778	6.75838e-43	1.91815	3.40531e-58
Brat1	368.671	449.826	148.803	159.697	319.802	313.344	171.649	197.412	-1.38239	2.41125e-13	-0.744233	3.02363e-06
Brca1	829.86	847.013	1875.85	1642.2	1473.22	1563.72	1186.52	1183.36	1.0743	3.98425e-22	-0.323082	3.50547e-06
Brca2	484.929	520.411	69.1287	79.6746	917.833	991.089	114.79	116.451	-2.71822	2.96899e-50	-3.01067	4.38754e-109
Brd2	3865.46	3784.04	8112.67	8274.33	3035.99	3113.42	8446.21	8549.72	1.10674	3.21774e-65	1.50158	3.40697e-255
Brd3os	3.49121	0	21.0901	24.3547	5.33004	1.0011	22.5289	14.4177	3.34166	0.000857247	2.60066	0.00584961
Brdt	34.5629	16.7489	62.0987	50.1011	101.271	118.13	47.2035	41.0351	1.06181	0.0364482	-1.27899	2.10985e-05
Bri3	99.8485	74.1735	731.124	1025.68	109.799	93.1023	540.695	519.039	3.31459	3.41986e-46	2.42254	1.58488e-53
Bri3bp	1014.89	940.328	362.047	369.843	1270.68	1309.44	343.298	337.153	-1.41133	2.17472e-32	-1.88778	2.86726e-89
Brip1	500.988	472.557	205.043	230.674	672.651	751.826	224.217	239.556	-1.14272	2.05904e-13	-1.5849	4.94849e-38
Brk1	1075.29	973.826	2792.1	2933	1175.81	1195.31	2253.97	2335.67	1.48504	1.62507e-54	0.987641	1.74147e-56
Brox	738.39	657.991	1013.5	1253.57	639.605	605.665	1182.23	1251.02	0.707716	2.0716e-06	1.00186	5.56108e-33
Brs3	0	0	270.657	226.499	0	0	163.067	211.83	11.0312	1.27335e-13	9.98041	1.93812e-11
Bsn	47.8295	29.9087	14.0601	21.2234	49.0364	52.0572	18.2377	24.3993	-1.11635	0.04633	-1.21257	0.00654346
Bspry	49.226	56.2283	18.7468	15.6566	296.35	273.3	59.0044	42.1442	-1.62738	0.000297074	-2.45533	1.46225e-27
Bst1	139.299	206.968	2105.5	2109.46	448.789	415.456	2926.62	2874.68	3.65603	2.04853e-95	2.7832	0
Bst2	1234.84	1214.29	8339.97	8463.25	1199.26	1206.32	6633.17	6565.62	2.78495	0	2.49103	0
Btaf1	1540.67	1563.62	1008.81	1023.59	837.882	871.958	1692.89	1685.77	-0.60115	1.07942e-11	1.01733	2.67002e-47
Btbd11	59.0014	50.2466	7.03004	10.0898	69.2905	62.0682	16.0921	9.98151	-2.60535	4.14108e-07	-2.29349	8.61498e-07
Btbd19	255.207	247.644	98.4206	117.25	136.449	147.162	113.718	112.015	-1.19449	1.07496e-08	-0.294669	0.195325
Btbd3	5.23681	7.17808	251.91	254.333	7.46205	15.0165	248.891	275.046	5.46819	3.5152e-44	4.56441	9.45421e-37
Btbd6	128.127	153.132	30.4635	55.3199	122.591	153.168	47.2035	55.4529	-1.64183	6.68772e-06	-1.3928	4.32239e-07
Btbd7	695.448	732.164	945.54	940.787	541.532	499.549	960.162	1095.75	0.413855	8.24207e-05	1.01705	5.67178e-26
Btbd8	127.429	105.278	39.8369	28.1819	116.195	114.125	42.9123	44.3623	-1.8256	1.38166e-07	-1.36499	3.35084e-06
Btf3l4	270.219	190.219	447.579	531.628	170.561	188.207	298.24	320.518	1.08149	8.38492e-07	0.820148	2.99986e-07
Btg1	4247.05	3575.88	14021.4	16668.3	2481.67	2492.74	15198.5	15342.7	1.97856	2.23507e-57	2.65322	0
Btg2	1182.82	1172.42	3465.81	3460.45	1365.56	1349.48	3606.78	3550.09	1.56332	3.20835e-94	1.43365	2.97176e-143
Btk	21.2964	19.1415	838.918	819.709	13.8581	18.0198	977.327	911.645	5.32978	5.83169e-135	5.91871	1.00725e-100
Btla	998.136	1103.03	121.854	114.815	470.109	499.549	168.431	168.577	-3.14984	3.59947e-106	-1.48995	1.71562e-25
Btnl2	0	0	21.0901	14.2649	1.06601	0	12.8737	15.5268	7.20694	2.84331e-05	4.81275	0.00472079
Bub1	801.93	867.351	647.935	641.92	2139.48	2089.29	552.496	546.765	-0.359695	0.00158381	-1.90836	6.61493e-146
Bub1b	1300.47	1336.32	453.438	421.684	2768.42	2695.96	513.875	526.802	-1.59008	1.67915e-49	-2.35746	8.96752e-236
Bvht	0.349121	0	43.3519	49.4052	0	2.0022	27.893	15.5268	7.30736	1.04628e-07	4.43816	0.0004339
Bysl	953.798	862.566	378.451	380.281	511.684	509.56	380.846	400.37	-1.25604	5.96125e-24	-0.351649	0.00275381
Bzw2	1920.51	1889.03	786.193	793.615	1815.41	1776.95	758.475	693.161	-1.26181	1.27095e-46	-1.27143	2.96658e-66
C030006K11Rik	248.923	222.52	38.6652	46.6218	120.459	98.1078	53.6403	51.0166	-2.43194	3.80895e-22	-1.02567	0.000425608
C130013H08Rik	36.6577	29.9087	37.4936	36.1841	21.3202	15.0165	34.3298	45.4713	0.129452	0.779687	1.17252	0.0187771
C130026I21Rik	5.58593	11.9635	287.06	421.684	10.6601	9.0099	429.123	397.042	5.57437	3.76306e-41	5.43129	1.45428e-50
C130036L24Rik	28.6279	26.3196	9.37339	12.8732	29.8482	25.0275	6.43684	3.32717	-1.25913	0.0361135	-2.44952	0.0011169
C130050O18Rik	6.28417	5.98173	99.5922	89.7644	8.52806	5.0055	145.902	102.033	3.93594	3.19828e-17	4.24132	9.86488e-18
C130071C03Rik	0.698241	0	42.1802	32.009	0	0	17.1649	26.6174	6.13525	3.99999e-07	6.88182	2.59255e-05
C1galt1c1	175.259	193.808	360.875	376.106	155.637	130.143	552.496	535.675	1.02035	8.50097e-10	1.96651	3.16942e-42
C1qa	2.09472	7.17808	19489.6	19211.7	22.3862	0	16641.4	16835.5	12.299	5.71392e-66	10.5823	1.89779e-05
C1qb	10.1245	10.7671	14963.4	14970.1	9.59407	1.0011	17143.5	16994.1	10.5155	0	11.6997	4.05979e-27
C1qbp	3461.88	3414.37	1649.72	1523.91	3421.88	3353.68	1641.39	1707.95	-1.11203	9.48024e-40	-0.981442	2.06503e-69
C1qc	10.1245	13.1598	12814.6	12778.2	11.7261	2.0022	13890.7	14057.3	10.2126	0	11.036	1.77357e-31
C1qtnf1	6.28417	5.98173	161.691	114.815	6.39605	4.0044	68.6596	58.78	4.47429	3.40383e-22	3.65889	8.82323e-10
C1qtnf12	163.388	123.224	18.7468	65.7577	165.231	143.157	43.9851	26.6174	-1.73408	0.0475789	-2.08748	1.6642e-12
C1qtnf6	86.931	71.7808	487.416	498.227	136.449	127.14	343.298	368.207	2.60885	1.32734e-45	1.46825	2.90594e-19
C1ra	6.98241	0	1227.91	1160.67	2.13202	1.0011	965.526	895.009	8.31517	9.7145e-07	9.26563	8.48753e-28
C1rl	0.698241	3.58904	294.09	299.563	1.06601	1.0011	313.26	336.044	7.7562	1.46195e-29	8.33143	1.99726e-15
C1s1	2.44384	2.39269	940.854	886.511	1.06601	0	271.42	243.993	8.55826	2.03069e-64	8.99834	9.69435e-10
C2	3.84033	7.17808	895.159	806.14	4.26403	4.0044	772.421	741.959	7.52018	2.23772e-85	7.55357	6.37962e-47
C2cd3	880.133	930.758	268.313	242.851	1169.41	1205.32	402.303	493.53	-1.82689	8.62811e-45	-1.37272	1.94516e-45
C3	43.9892	44.2648	7886.53	7485.24	108.733	96.1056	7930.19	7936.41	7.45306	0	6.31308	0
C3ar1	70.8715	71.7808	4919.86	4802.05	6.39605	5.0055	5380.13	5321.26	6.10143	0	9.91502	1.28723e-112
C430042M11Rik	29.3261	28.7123	12.8884	12.8732	23.4522	12.0132	12.8737	12.1996	-1.16598	0.0373772	-0.460614	0.52181
C4a	4.53857	10.7671	42.1802	33.4007	6.39605	11.0121	61.15	43.2532	2.45052	0.000226618	2.61308	1.79292e-06
C4b	1.39648	7.17808	6678.54	6832.88	7.46205	0	6668.57	6786.32	10.8695	2.40024e-32	10.8581	5.58743e-09
C530044C16Rik	0	0	35.1502	43.1426	0	0	24.6746	32.1627	8.38085	1.21709e-07	7.25882	5.43069e-06
C5ar1	15.3613	17.9452	1595.82	1626.89	0	0	1630.67	1613.68	6.66069	2.30805e-203	13.0946	3.857e-19
C5ar2	0.698241	1.19635	39.8369	47.3177	0	2.0022	51.4947	52.1257	5.73724	1.25797e-08	5.68714	4.861e-07
C6	0	0	226.133	221.628	0	0	28.9658	39.9261	10.8863	2.53361e-13	7.53615	1.72086e-06
C7	0	0	121.854	122.469	0	1.0011	15.0193	8.87246	10.0135	2.84227e-11	4.57162	0.00910122
C77080	9.42626	13.1598	255.425	250.505	10.6601	13.0143	255.328	249.538	4.5967	3.09879e-44	4.44583	3.41881e-36
C8g	5.93505	11.9635	4.68669	9.74188	25.5842	12.0132	5.36403	4.43623	-0.181905	0.86173	-1.89966	0.0259883
C9orf72	118.003	74.1735	799.081	726.118	196.145	200.22	966.599	1019.22	2.94317	3.94181e-40	2.35947	2.19081e-95
CAAA01118383.1	213.313	209.361	330.412	320.786	140.713	153.168	346.517	347.135	0.626893	0.000113247	1.27314	1.91188e-15
Cabin1	1843.01	1857.93	434.691	383.76	1254.69	1297.43	522.457	537.893	-2.1827	2.66316e-88	-1.23242	1.59972e-47
Cables1	127.778	159.114	127.712	122.121	882.654	848.932	215.634	179.667	-0.177653	0.49003	-2.09435	1.03433e-66
Cables2	393.808	384.027	166.378	200.752	375.235	384.422	258.546	237.338	-1.05789	2.35678e-09	-0.579894	3.82227e-05
Cabyr	1.39648	0	16.4034	5.56679	1.06601	1.0011	16.0921	11.0906	3.53643	0.016454	3.75447	0.00541744
Cachd1	0.349121	0	35.1502	31.6611	0	0	11.8009	9.98151	6.82417	1.31534e-06	5.8765	0.00100353
Cacna1a	33.1665	51.4429	14.0601	5.91471	61.8285	52.0572	3.21842	2.21811	-2.17428	0.000897321	-4.349	1.91762e-08
Cacna1d	1.7456	1.19635	72.6438	46.6218	1.06601	1.0011	77.2421	67.6525	5.21317	5.98e-11	6.16816	2.24356e-08
Cacna1f	0	0	10.5451	8.6981	0	0	9.65526	8.87246	6.33801	0.000843746	5.64276	0.00213686
Cacna1s	21.6455	28.7123	28.1202	15.6566	75.6866	78.0858	28.9658	21.0721	-0.222093	0.724804	-1.5826	3.11349e-05
Cacna2d2	29.3261	35.8904	0	0	39.4423	44.0484	0	0	-8.09898	4.54848e-07	-7.66622	8.42447e-07
Cacna2d4	29.6753	37.0867	5.85837	0	14.9241	20.022	1.07281	2.21811	-3.5811	0.145919	-3.38126	0.00284668
Cacnb1	24.0893	31.105	16.4034	14.2649	47.9703	49.0539	11.8009	23.2902	-0.835762	0.142974	-1.43642	0.00292846
Cacnb3	120.097	112.457	98.4206	113.771	228.126	222.244	90.1158	82.0702	-0.116799	0.663731	-1.35121	6.40445e-11
Cacnb4	5.58593	10.7671	206.215	180.921	26.6502	21.0231	195.251	205.176	4.77058	3.08052e-31	3.10913	3.06289e-26
Cacng7	0.349121	0	124.197	130.472	2.13202	0	97.6254	117.56	8.75687	1.96783e-11	6.73612	4.6991e-10
Cactin	784.125	733.36	328.069	330.528	683.311	665.731	408.739	397.042	-1.19947	1.30737e-21	-0.707986	4.32609e-11
Cacul1	694.401	686.703	1787.97	1838.78	916.767	963.058	1916.03	1913.12	1.40083	1.77046e-53	1.06106	7.72552e-56
Cad	4722.55	4398.97	381.966	415.421	3386.71	3463.8	652.267	607.763	-3.49804	2.9115e-282	-2.40719	1.33135e-281
Cadm1	0	2.39269	3645.08	3464.98	0	1.0011	2971.68	2873.57	11.905	1.6229e-10	12.5017	7.67855e-18
Cadm3	0	1.19635	127.712	144.041	1.06601	2.0022	27.893	37.7079	8.83759	1.13114e-11	4.44071	1.15242e-05
Cadm4	5.93505	3.58904	222.618	284.254	24.5182	21.0231	165.212	185.213	5.59593	2.15443e-39	2.98104	2.82613e-22
Cage1	17.8052	22.7306	7.03004	10.4377	30.9142	30.033	5.36403	11.0906	-1.13557	0.107094	-1.85871	0.0041217
Cald1	1.7456	4.78539	482.729	489.529	2.13202	2.0022	257.474	230.684	7.63046	1.59286e-49	6.92048	5.39076e-20
Calhm2	210.171	242.858	71.4721	45.2301	144.977	150.165	67.5868	84.2883	-1.99536	1.58958e-11	-0.924955	0.000150404
Calhm5	1.39648	0	105.451	106.117	0	0	97.6254	93.1608	6.65346	8.05524e-16	9.00686	2.1804e-09
Calhm6	3.84033	11.9635	2255.47	2304.65	26.6502	42.0462	3207.69	3229.57	8.34321	7.90154e-33	6.57548	9.91197e-277
Calm1	8758.74	9327.91	26286.5	25580.4	8186.94	8192	29586.9	29757.1	1.52901	2.39487e-113	1.89237	0
Calm2	3875.59	3737.39	5964.99	6879.85	2508.32	2560.81	5425.18	5470.98	0.76359	4.06091e-15	1.13895	1.02478e-125
Calml4	0	0	124.197	105.769	0	1.0011	20.3833	15.5268	9.91869	5.03145e-11	5.15785	0.00186842
Calr	10305.7	9979.92	16952.9	17073.3	8520.6	8512.35	21088.2	21215.2	0.753885	8.85287e-35	1.34755	5.41093e-303
Calr3	17.456	21.5342	5.85837	2.43547	29.8482	42.0462	5.36403	5.54529	-2.37518	0.00591446	-2.68713	8.28141e-05
Calu	2134.87	2194.1	5295.96	5250.52	2136.28	2275.5	4097.05	4086.88	1.29414	5.56187e-78	0.926106	5.19382e-69
Camk1	14.6631	20.3379	1313.45	1268.53	29.8482	23.0253	897.939	821.811	6.32872	9.1562e-173	5.06422	2.20133e-110
Camk1d	330.617	350.53	949.056	895.557	410.413	419.461	1374.27	1405.18	1.44903	3.55515e-33	1.7786	4.93657e-93
Camk2b	20.9472	28.7123	228.476	218.148	23.4522	27.0297	304.677	311.645	3.24791	1.44145e-29	3.64235	1.15107e-43
Camk2d	742.23	793.178	1949.66	1982.82	724.885	740.814	2006.15	2045.1	1.37154	5.73547e-50	1.50158	1.9576e-103
Camk2n1	14.6631	10.7671	268.313	254.68	148.175	168.185	123.373	139.741	4.28054	3.19641e-44	-0.232368	0.284251
Camk2n2	2.09472	2.39269	105.451	86.981	5.33004	6.0066	56.8588	54.3438	5.46627	1.46086e-17	3.32741	2.12603e-08
Camk4	1017.69	1075.52	45.6953	49.7532	966.869	966.061	110.499	107.579	-4.42158	7.2633e-157	-3.11249	1.53346e-115
Camkk1	81.3451	58.621	35.1502	36.532	101.271	108.119	41.8395	37.7079	-0.975699	0.0115761	-1.36088	1.09705e-05
Camta2	417.897	405.561	577.635	594.602	332.594	295.324	857.173	923.845	0.516469	3.9891e-05	1.54023	2.15985e-46
Capg	2075.87	2061.3	6063.41	5958.2	1464.69	1478.62	6271.63	6352.68	1.54609	1.11333e-113	2.13568	0
Capn1	1900.96	1711.97	863.523	902.167	1570.23	1600.76	1314.19	1398.52	-1.02584	1.11845e-22	-0.19052	0.00505039
Capn2	1725.01	1698.81	2637.44	2697.46	1482.82	1468.61	3029.61	2955.64	0.647812	5.04829e-17	1.0553	1.17912e-75
Capn3	41.5454	44.2648	3.51502	0.347924	57.5644	67.0737	0	0	-5.05645	1.65327e-07	-8.24447	6.78394e-08
Capn5	20.249	26.3196	132.399	158.305	127.921	129.142	231.726	227.357	2.71156	3.23018e-16	0.871754	2.75585e-06
Capn6	0	1.19635	22.2618	21.5713	0	0	25.7474	38.817	6.13039	3.92912e-05	7.44229	2.62437e-06
Capns1	2055.62	2017.04	4127.81	3933.28	1864.45	1841.02	4047.7	4061.37	0.990736	1.78071e-38	1.1651	3.02401e-110
Capsl	111.369	117.242	0	4.17509	47.9703	53.0583	5.36403	1.10906	-5.49389	2.31931e-06	-3.91652	1.36801e-07
Capza2	4906.89	5175.39	10525.1	10605.4	3857.88	3733.1	11569.2	11387.8	1.07733	9.74344e-59	1.63194	0
Car12	512.858	496.484	2.34335	12.1773	198.277	215.236	32.1842	15.5268	-5.99382	1.5335e-11	-3.07464	3.90479e-24
Car13	52.3681	59.8173	598.725	636.005	35.1783	44.0484	483.836	583.364	3.50232	2.19e-82	3.78227	1.78093e-71
Car14	0.349121	0	863.523	891.73	2.13202	0	568.588	591.127	11.5389	8.86721e-20	9.16807	1.34455e-18
Car2	12.9175	17.9452	78.5021	73.7599	73.5545	79.0869	67.5868	65.4344	2.37135	1.68761e-08	-0.163754	0.604413
Car5b	20.249	26.3196	50.382	51.8407	73.5545	57.0627	50.4219	55.4529	1.18155	0.00643817	-0.266509	0.446467
Car6	0	0	4425.41	4267.99	4.26403	0	2706.69	2673.94	15.1657	3.77918e-25	10.3824	5.85403e-46
Car9	10.4736	22.7306	1331.02	1207.3	35.1783	25.0275	1018.09	999.261	6.36654	3.80463e-36	5.10857	3.13303e-129
Card10	2.79297	2.39269	28.1202	15.6566	17.0561	9.0099	9.65526	11.0906	3.01894	0.000654092	-0.290642	0.725365
Card14	0	0	77.3304	82.458	0	0	42.9123	47.6895	9.40373	6.86232e-10	7.93202	2.98492e-07
Card19	114.162	100.493	811.97	865.983	128.987	141.155	789.586	776.34	2.95261	1.01182e-83	2.56907	3.79305e-84
Card6	309.67	287.123	89.0472	82.458	584.172	534.587	122.3	88.7246	-1.80793	1.98916e-19	-2.36836	5.50067e-49
Card9	13.2666	10.7671	256.596	221.628	3.19802	6.0066	283.221	304.991	4.25689	2.19009e-39	6.01967	1.66812e-31
Carhsp1	482.136	495.287	1345.08	1457.45	563.918	551.606	1271.28	1333.09	1.53372	3.16789e-46	1.25838	1.45789e-51
Carm1	977.887	914.009	359.704	348.968	972.199	983.08	475.253	490.203	-1.41572	2.20574e-32	-0.983226	5.5737e-26
Carmil1	3.84033	5.98173	213.245	201.1	11.7261	12.0132	225.289	221.811	5.5611	8.98624e-36	4.26998	1.76545e-32
Carmil2	779.237	726.182	52.7253	33.7486	963.671	944.037	119.082	102.033	-4.21381	1.28143e-79	-3.07233	1.02764e-111
Carnmt1	340.043	218.931	104.279	140.561	237.72	244.268	127.664	114.233	-1.17872	7.0043e-05	-0.958967	3.48019e-07
Carns1	51.3207	40.6758	11.7167	10.7856	69.2905	62.0682	15.0193	27.7264	-2.0541	6.04775e-05	-1.58787	0.000171842
Cars2	497.846	441.452	178.094	156.566	424.271	467.514	170.576	179.667	-1.50203	3.42731e-18	-1.31416	2.54924e-19
Casc3	1269.4	1120.98	507.335	538.934	989.255	960.054	632.956	626.617	-1.18428	3.7232e-22	-0.594626	1.62135e-11
Cask	11.1719	11.9635	476.871	461.347	19.1881	25.0275	462.38	446.95	5.37054	5.63792e-80	4.39228	1.80013e-64
Casp1	209.472	210.557	2475.75	2420.86	105.535	115.126	3499.5	3698.71	3.55112	1.93162e-261	5.06097	0
Casp12	4.18945	1.19635	875.24	892.425	6.39605	1.0011	811.042	934.935	7.9943	1.39555e-77	7.9504	9.08149e-46
Casp2	727.218	699.863	343.3	374.366	967.935	970.065	385.138	456.932	-0.977484	2.44098e-14	-1.16847	6.46877e-31
Casp3	4314.08	4596.36	1489.2	1446.32	4129.71	4160.57	2270.06	2307.95	-1.59403	3.56838e-88	-0.821692	4.1316e-59
Casp4	187.478	185.434	2899.89	2814.36	70.3565	85.0935	2922.33	2980.04	3.94188	0	5.27794	0
Casp7	162.341	133.991	690.116	704.894	127.921	132.145	837.862	831.793	2.21639	1.9224e-44	2.71726	3.38858e-95
Casp8ap2	1527.4	1528.93	578.807	562.593	2060.59	1898.08	802.46	853.974	-1.41607	3.07721e-49	-1.22173	8.04845e-64
Cass4	32.8173	23.9269	221.446	246.33	23.4522	15.0165	199.542	190.758	2.99222	6.19865e-27	3.38564	9.68839e-27
Castor1	411.264	411.543	127.712	121.078	109.799	133.146	110.499	85.3974	-1.72594	6.94495e-25	-0.275463	0.284281
Catsperd	1.39648	0	31.6352	13.2211	8.52806	7.0077	25.7474	22.1811	4.50723	0.000178344	1.6633	0.0155931
Cav1	0.349121	2.39269	118.339	111.684	0	1.0011	74.0237	72.0887	7.10016	5.90405e-15	7.18014	1.99604e-06
Cav2	11.1719	25.1233	1366.17	1296.71	15.9901	26.0286	1089.97	1029.21	6.29636	1.80937e-32	5.6816	9.99674e-120
Cavin1	17.8052	21.5342	647.935	708.026	141.779	121.133	236.018	226.248	5.17923	1.09333e-107	0.85102	5.7058e-06
Cavin2	1.7456	3.58904	77.3304	60.1909	8.52806	4.0044	33.257	36.5989	4.92238	7.46129e-13	2.5238	0.000118791
Cavin3	2.09472	1.19635	80.8455	64.7139	27.7162	32.0352	9.65526	11.0906	5.29069	9.62963e-14	-1.49278	0.0144231
Cbfa2t3	4.18945	9.57077	241.365	225.107	26.6502	27.0297	181.304	218.484	5.36504	5.22149e-37	2.93102	1.44441e-24
Cblb	3221.34	3210.99	877.583	822.145	4388.75	4264.68	1598.48	1587.06	-1.91811	1.80599e-112	-1.40644	2.26967e-150
Cbr1	315.256	346.94	169.893	160.741	400.819	435.478	145.902	144.177	-0.993794	1.47229e-08	-1.49287	4.66862e-22
Cbr2	1.04736	0	961.944	1118.92	1.06601	0	160.921	175.231	10.3418	1.94688e-33	8.38099	1.49307e-08
Cbr3	2.44384	0	119.511	124.557	3.19802	4.0044	101.917	97.597	6.07347	6.34099e-20	4.82266	1.93596e-14
Cbx2	161.992	174.667	7.03004	15.6566	256.908	285.313	18.2377	23.2902	-3.71783	9.59357e-22	-3.6745	1.04529e-35
Cbx3	1962.06	1382.98	869.382	1174.59	1686.42	1594.75	661.922	696.488	-0.702515	0.0419684	-1.23715	7.40575e-59
Cbx4	341.789	379.242	789.708	737.947	621.483	581.639	892.575	865.065	1.0979	6.44001e-17	0.582733	2.96892e-10
Cbx5	3335.5	3516.06	1401.32	1472.76	5117.9	5145.65	1555.57	1457.3	-1.24064	2.92402e-51	-1.73284	2.15963e-226
Cbx6	1195.39	1030.05	406.571	388.283	1337.84	1398.54	217.78	268.392	-1.48663	2.46679e-29	-2.45945	1.16798e-121
Cbx7	530.663	472.557	23.4335	18.0921	460.515	443.487	32.1842	37.7079	-4.66731	2.34596e-77	-3.65935	2.46436e-59
Cby1	178.052	197.397	100.764	112.379	260.106	223.245	93.3342	109.797	-0.788791	0.000421767	-1.21562	1.27511e-09
Cc2d2a	3.84033	3.58904	141.772	163.872	1.06601	2.0022	111.572	126.433	5.3538	1.75951e-27	6.29903	1.68737e-12
Ccar2	1040.73	1034.84	321.039	392.458	1026.57	1018.12	440.924	428.096	-1.51614	1.26129e-27	-1.19904	5.49576e-37
Ccdc112	24.4384	25.1233	106.622	92.5478	52.2344	35.0385	84.7518	66.5434	2.00998	5.89833e-09	0.833442	0.0166681
Ccdc114	18.8525	11.9635	5.85837	4.52301	20.2541	31.0341	11.8009	5.54529	-1.63458	0.0541356	-1.52649	0.0260183
Ccdc116	97.4047	128.009	2.34335	5.91471	43.7063	41.0451	7.50965	2.21811	-4.5263	3.30041e-18	-3.07806	6.07672e-06
Ccdc120	18.1543	17.9452	12.8884	20.1796	36.2443	26.0286	8.58246	13.3087	-0.0777817	0.908949	-1.4741	0.0149647
Ccdc122	75.4101	52.6392	223.79	239.372	22.3862	44.0484	165.212	131.978	1.82086	3.03248e-12	2.18926	1.663e-12
Ccdc125	118.352	126.813	28.1202	21.2234	116.195	132.145	41.8395	43.2532	-2.35346	2.4849e-12	-1.51108	2.03378e-07
Ccdc126	82.7416	93.315	123.026	129.428	84.2146	61.0671	148.047	138.632	0.545832	0.0330848	1.01914	5.13147e-05
Ccdc13	1.7456	2.39269	83.1888	77.2392	1.06601	1.0011	34.3298	44.3623	5.39147	2.45373e-15	5.28612	4.99036e-06
Ccdc136	4.88769	3.58904	239.021	249.462	42.6403	38.0418	170.576	184.103	5.75433	2.01095e-41	2.1726	1.30262e-16
Ccdc137	520.888	477.342	249.566	228.934	323	358.394	225.289	204.067	-1.06738	2.86398e-12	-0.631348	3.32854e-05
Ccdc14	119.05	135.187	50.382	40.7071	187.617	154.169	43.9851	41.0351	-1.49447	5.8598e-07	-1.97049	2.51269e-13
Ccdc141	13.6157	17.9452	159.348	192.402	134.317	128.141	171.649	120.887	3.56304	2.17107e-25	0.193568	0.410981
Ccdc15	56.9067	43.0685	82.0171	48.0135	105.535	92.1012	33.257	25.5083	0.337829	0.455455	-1.71205	5.31787e-07
Ccdc163	160.595	168.685	104.279	94.6354	281.426	276.303	102.989	109.797	-0.726646	0.00155556	-1.35535	2.29468e-13
Ccdc166	78.9013	64.6027	10.5451	9.74188	65.0265	54.0594	7.50965	23.2902	-2.84411	5.48224e-10	-1.9219	8.37396e-05
Ccdc17	29.6753	35.8904	17.5751	13.569	18.1221	30.033	16.0921	8.87246	-1.08604	0.0444712	-0.912342	0.16207
Ccdc171	68.0785	55.0319	31.6352	27.1381	46.9043	34.0374	41.8395	37.7079	-1.09466	0.00610286	0.013002	0.976526
Ccdc173	38.4033	37.0867	106.622	68.889	54.3664	62.0682	36.4754	31.0536	1.19765	0.00201581	-0.750768	0.0525508
Ccdc174	413.708	379.242	813.141	800.573	305.944	346.38	713.417	699.815	1.02324	6.39255e-17	1.14924	1.25274e-24
Ccdc18	96.0082	94.5114	77.3304	62.6263	323	356.391	35.4026	66.5434	-0.460554	0.126711	-2.70358	3.95136e-11
Ccdc180	0	1.19635	14.0601	20.8754	1.06601	1.0011	18.2377	24.3993	5.79267	0.00021221	4.4018	0.000420334
Ccdc184	401.14	382.831	2.34335	1.73962	57.5644	81.0891	1.07281	5.54529	-7.69566	1.21267e-39	-4.36918	8.32937e-10
Ccdc186	209.822	238.073	636.219	657.925	298.482	320.352	753.11	741.959	1.55623	2.87439e-27	1.30699	1.65999e-32
Ccdc189	15.0122	10.7671	22.2618	22.963	10.6601	11.0121	26.8202	24.3993	0.779912	0.213811	1.27601	0.0416498
Ccdc22	22.6928	32.3014	84.3605	64.366	49.0364	36.0396	35.4026	45.4713	1.4742	0.000337835	-0.0368762	0.93341
Ccdc28a	133.713	125.616	45.6953	48.3615	195.079	180.198	69.7325	74.3068	-1.4516	1.94248e-07	-1.34629	3.3177e-09
Ccdc28b	22.3437	23.9269	96.0772	66.8014	55.4324	73.0803	83.6789	84.2883	1.8133	8.19481e-06	0.419006	0.170232
Ccdc30	63.8891	72.9771	15.2318	6.61056	61.8285	49.0539	13.9465	8.87246	-2.77945	2.51386e-07	-2.241	9.6419e-06
Ccdc34	260.793	239.269	323.382	294.692	531.938	530.583	202.761	205.176	0.298785	0.0848916	-1.34601	2.95435e-24
Ccdc38	6.98241	5.98173	70.3004	69.5848	23.4522	16.0176	64.3684	73.1978	3.39884	5.50385e-12	1.84057	8.12411e-06
Ccdc40	254.509	253.625	76.1588	89.4165	185.485	207.228	84.7518	67.6525	-1.58746	1.06718e-13	-1.32965	3.86841e-09
Ccdc51	181.543	165.096	51.5536	68.1931	147.109	160.176	83.6789	57.671	-1.49648	3.09891e-08	-1.08348	1.71722e-05
Ccdc58	626.672	673.543	298.777	266.162	867.73	830.913	262.838	251.756	-1.20258	2.77463e-17	-1.68718	4.05967e-51
Ccdc63	33.8647	32.3014	1.17167	8.35018	10.6601	17.0187	4.29123	4.43623	-2.58217	0.00148686	-1.63276	0.0819481
Ccdc66	386.477	416.329	112.481	102.638	353.915	382.42	143.756	134.196	-1.90175	2.4792e-26	-1.37042	2.53491e-17
Ccdc69	205.981	198.594	80.8455	90.4603	219.598	192.211	90.1158	88.7246	-1.21984	4.13376e-08	-1.16722	3.89296e-08
Ccdc71l	490.514	490.502	1009.98	928.61	367.773	396.435	1293.81	1186.69	0.986206	1.3879e-17	1.73317	8.5601e-75
Ccdc77	211.567	186.63	171.064	145.432	404.017	387.426	157.703	160.813	-0.3467	0.117586	-1.27784	5.48404e-17
Ccdc80	0	1.19635	516.708	444.647	0	2.0022	80.4605	79.8521	10.6584	6.27795e-17	6.31572	8.60973e-09
Ccdc82	1004.07	953.488	290.575	296.083	865.598	892.981	351.881	361.553	-1.73088	9.10035e-48	-1.26681	6.662e-35
Ccdc84	158.501	171.078	82.0171	70.6286	213.202	197.217	95.4798	94.2699	-1.11603	5.81646e-06	-1.07727	2.22747e-07
Ccdc85b	201.093	180.648	73.8154	78.9788	192.947	172.189	49.3491	53.2347	-1.31168	1.8875e-08	-1.79638	6.08944e-13
Ccdc85c	225.881	266.785	155.833	152.391	411.479	367.404	138.392	100.924	-0.658988	0.0010759	-1.66467	9.92903e-22
Ccdc86	458.745	486.913	644.42	611.303	269.7	261.287	671.577	614.418	0.418728	0.000862939	1.31199	7.1187e-28
Ccdc88a	73.3153	77.7625	1803.21	1862.44	54.3664	40.044	1266.99	1310.91	4.62559	1.32707e-258	4.81222	4.94152e-171
Ccdc88b	3075.4	2793.47	1021.7	973.492	2369.74	2470.71	1695.04	1652.5	-1.55399	5.69504e-58	-0.497044	6.4743e-17
Ccdc88c	1541.02	1494.24	97.2489	75.8475	1350.63	1349.48	171.649	174.122	-4.18091	8.067e-166	-2.93012	1.87672e-152
Ccdc9	519.841	522.803	815.485	807.88	411.479	445.489	864.682	842.883	0.646527	4.98852e-09	1.02905	6.18172e-25
Ccdc90b	173.513	193.808	442.893	426.555	185.485	170.187	371.191	307.209	1.26242	3.94924e-15	0.968333	2.13404e-09
Ccdc92	206.33	168.685	29.2918	30.2694	315.538	318.35	46.1307	46.5804	-2.65123	6.6087e-20	-2.73841	2.6037e-35
Ccdc9b	0	0	22.2618	17.3962	0	0	8.58246	19.963	7.37867	1.23593e-05	6.2637	0.000298141
Cchcr1	320.842	325.406	167.549	176.05	392.291	401.441	152.339	130.869	-0.896533	1.10496e-07	-1.45077	5.20023e-20
Ccl11	0	0	256.596	204.927	0	0	48.2763	37.7079	10.9226	2.48537e-13	7.85767	4.23877e-07
Ccl12	0	1.19635	1833.67	1728.14	1.06601	0	1653.2	1847.69	12.5548	2.8424e-23	11.7617	6.35055e-16
Ccl17	0	0	67.9571	62.9743	0	0	1.07281	0	9.10965	3.04002e-09	1.54968	0.781507
Ccl2	33.8647	56.2283	9836.2	9342.11	6.39605	1.0011	7450.64	7343.07	7.79706	1.67919e-115	11.0342	1.62055e-89
Ccl22	14.6631	13.1598	735.811	717.767	17.0561	22.0242	135.174	155.268	5.67682	2.06604e-116	2.92436	3.1644e-18
Ccl24	33.1665	38.2831	172.236	158.305	3.19802	2.0022	12.8737	13.3087	2.23931	1.12088e-15	2.37334	0.0242439
Ccl3	134.761	161.507	1375.54	1349.25	22.3862	15.0165	2140.25	2106.1	3.24167	1.13945e-125	6.87081	1.32068e-166
Ccl4	239.846	253.625	3684.91	3637.55	28.7822	30.033	5720.21	5914.6	3.9101	0	7.66215	0
Ccl5	413.708	393.598	1732.91	1601.84	469.043	527.579	1904.23	1822.18	2.04561	1.17877e-78	1.93652	9.29099e-130
Ccl6	149.424	143.562	13111	12840.8	91.6767	104.114	5763.12	5757.12	6.46498	0	5.91121	0
Ccl7	18.5034	17.9452	12402.2	12281.7	12.7921	1.0011	8370.04	8106.1	9.39904	0	10.2635	9.38829e-15
Ccl8	6.63329	8.37443	8441.91	8349.83	4.26403	2.0022	7070.87	7062.48	10.2273	3.26263e-264	11.1908	3.81088e-79
Ccl9	115.21	125.616	9456.58	9278.44	38.3763	55.0605	4507.93	4629.2	6.31373	0	6.63898	0
Ccna2	2055.27	2191.71	1302.9	1180.85	4218.19	4196.61	1155.41	1142.33	-0.768619	1.25701e-14	-1.83749	4.32907e-230
Ccnb1	1131.5	806.338	406.571	518.059	1558.5	1481.63	351.881	361.553	-1.05766	3.68204e-07	-2.05607	1.66514e-115
Ccnb1ip1	59.6996	52.6392	26.9485	29.5736	130.053	118.13	36.4754	19.963	-0.981365	0.0141882	-2.09674	2.47733e-10
Ccnb2	520.888	559.89	550.687	477.7	1490.28	1615.77	452.725	438.078	-0.0680065	0.656735	-1.76699	4.15198e-93
Ccnd1	55.5102	62.21	5379.15	5219.21	21.3202	15.0165	5703.04	5757.12	6.53629	0	8.34384	3.57749e-246
Ccnd2	26261.9	26062.4	9353.47	9302.45	7728.56	7819.59	6596.69	6755.27	-1.47981	6.11357e-148	-0.184685	9.60099e-06
Ccnd3	4470.14	4309.24	1633.31	1645.68	3535.95	3670.03	1832.35	1803.33	-1.41336	1.84759e-80	-0.951944	6.12941e-68
Ccne1	1004.07	1045.61	299.948	324.613	1284.54	1260.38	457.016	450.277	-1.69484	7.80391e-46	-1.45263	3.57993e-61
Ccne2	791.456	872.137	185.124	195.185	845.344	818.899	241.382	295.009	-2.10897	5.15397e-52	-1.59954	2.02446e-43
Ccnf	629.115	650.812	194.498	202.144	1086.26	1077.18	262.838	282.81	-1.67477	7.95289e-34	-1.95266	2.08783e-78
Ccng1	18179.8	19172.6	2615.18	2494.62	9489.6	9628.58	2763.55	2869.13	-2.86338	0	-1.72815	0
Ccng2	780.285	838.639	534.283	499.619	2707.66	2658.92	510.656	484.658	-0.640204	1.06337e-07	-2.39514	2.25036e-236
Ccni	3171.76	2608.04	2249.61	2383.63	5057.14	5185.7	2187.45	2040.67	-0.313013	0.0112526	-1.24117	5.06108e-124
Ccnl1	1411.49	1539.7	2998.31	2962.57	1378.35	1316.45	3195.89	3099.81	1.02695	1.55163e-32	1.25985	2.29725e-102
Ccno	8.02977	4.78539	55.0687	48.7094	10.6601	16.0176	57.9316	54.3438	2.90987	1.55096e-07	2.10345	9.86049e-06
Ccnyl1	78.9013	62.21	339.785	386.196	70.3565	57.0627	259.619	326.063	2.33993	6.7431e-27	2.2376	1.4083e-25
Ccp110	881.53	845.817	222.618	219.888	1036.16	923.014	236.018	232.902	-1.96103	6.34621e-54	-2.027	1.99941e-70
Ccpg1os	30.3735	41.8721	11.7167	23.3109	38.3763	55.0605	18.2377	11.0906	-0.952571	0.107292	-1.63523	0.00130857
Ccr1	92.517	92.1187	3950.88	3742.27	25.5842	25.0275	4055.21	4182.25	5.38582	0	7.38212	2.84078e-263
Ccr2	27.2314	39.4794	5008.9	4968.01	189.749	170.187	7018.3	7078	7.36412	0	5.32868	0
Ccr4	1675.43	1696.42	4.68669	9.39395	272.898	239.263	4.29123	7.7634	-7.66748	3.99868e-159	-5.37962	2.2425e-29
Ccr5	129.524	153.132	8587.19	8410.37	467.977	425.467	13812.4	13928.6	5.96046	0	4.99327	0
Ccr7	8568.47	8275.13	1582.93	1704.48	7688.05	7733.49	2336.57	2251.39	-2.34525	3.10189e-200	-1.71372	9.75691e-292
Ccr8	64.9364	66.9954	21.0901	13.2211	5.33004	0	11.8009	12.1996	-2.0095	7.6366e-06	2.23067	0.0498809
Ccr9	89.0258	93.315	74.9871	61.2346	1003.11	996.094	54.7132	64.3253	-0.430052	0.160815	-4.03641	9.03317e-131
Ccrl2	22.6928	33.4977	3094.39	3076	61.8285	70.077	4745.03	4704.62	6.92523	0	6.19519	0
Ccsap	89.724	83.7443	59.7553	34.7924	141.779	131.144	53.6403	51.0166	-0.918703	0.0198689	-1.34687	5.32443e-07
Cct4	6424.52	6563.16	3479.87	3650.07	7651.8	7603.35	3640.03	3736.41	-0.854883	1.27192e-34	-1.01326	1.44522e-118
Cd109	20.9472	31.105	759.244	702.807	29.8482	28.0308	538.549	576.71	4.93456	3.14051e-103	4.3043	5.05809e-79
Cd14	53.7646	50.2466	9439	9218.6	18.1221	21.0231	9388.13	9525.69	7.47112	0	8.94819	0
Cd151	102.292	89.726	802.596	871.55	93.8087	72.0792	657.631	686.506	3.1093	8.32655e-87	3.05763	5.05657e-83
Cd160	217.502	203.379	36.3219	40.3592	238.786	227.25	95.4798	83.1793	-2.43272	1.04524e-21	-1.34686	4.12818e-11
Cd163	0.698241	1.19635	720.579	745.949	1.06601	1.0011	72.9509	72.0887	9.82688	1.56137e-30	6.16921	2.18496e-08
Cd164	3417.19	3634.5	8521.58	8376.62	4419.67	4360.79	7663.06	7495.01	1.27097	4.53614e-72	0.822975	2.99146e-81
Cd177	0	0	315.18	289.125	0	0	283.221	268.392	11.316	2.35343e-14	10.5386	1.02766e-12
Cd180	35.6103	41.8721	4225.05	4199.1	15.9901	6.0066	7491.41	7603.7	6.82804	0	9.4782	4.38884e-194
Cd1d1	40.8471	40.6758	139.429	126.296	53.3004	57.0627	78.3149	75.4159	1.70479	2.53053e-09	0.512834	0.105431
Cd2	1833.23	1725.13	344.472	298.519	1212.05	1187.3	490.273	501.294	-2.47898	2.63084e-94	-1.23975	2.00305e-45
Cd200	1124.52	1195.15	132.399	121.078	377.367	381.419	95.4798	103.142	-3.20151	5.36204e-123	-1.89918	4.22897e-28
Cd200r1	87.2802	102.886	408.914	390.719	24.5182	21.0231	448.433	560.074	2.1042	3.64906e-29	4.50628	1.97444e-67
Cd200r4	59.6996	52.6392	879.927	838.149	42.6403	28.0308	1145.76	1161.18	3.90862	1.59596e-120	5.07229	6.33003e-148
Cd209a	0	0	481.558	470.741	0	0	75.0965	84.2883	11.9749	4.96701e-16	8.74688	7.45847e-09
Cd209b	0	0	87.8755	57.0596	0	0	7.50965	6.65434	9.24388	2.3147e-09	5.25541	0.00680988
Cd209d	0	0	93.7339	112.379	0	0	7.50965	8.87246	9.77594	1.09342e-10	5.46442	0.00370859
Cd209f	0	0	756.901	806.836	0	0	78.3149	72.0887	12.6938	6.4893e-18	8.66385	1.09227e-08
Cd209g	0	0	139.429	191.358	1.06601	0	8.58246	18.854	10.4613	3.58158e-12	4.76088	0.00579461
Cd22	2.44384	0	113.652	118.642	0	1.0011	146.975	181.885	6.00464	3.16348e-19	8.34946	1.75363e-08
Cd226	759.337	836.246	128.884	142.301	596.964	599.659	173.795	129.76	-2.52854	1.34851e-63	-1.94175	3.08363e-41
Cd244a	8.3789	5.98173	287.06	310	14.9241	24.0264	540.695	540.111	5.28151	1.45786e-51	4.82005	3.08151e-73
Cd247	2005.7	2208.46	119.511	96.0271	2288.72	2340.57	222.071	260.628	-4.32424	1.61302e-196	-3.22803	2.06071e-270
Cd248	0	0	359.704	352.795	0	0	67.5868	56.5619	11.5565	5.7592e-15	8.38739	3.94536e-08
Cd24a	757.592	766.858	424.146	494.052	1080.93	1089.2	429.123	417.006	-0.711537	1.04585e-07	-1.32356	1.44714e-45
Cd27	1562.66	1545.68	141.772	131.167	1371.95	1472.62	264.983	293.9	-3.51899	4.06624e-181	-2.31363	7.12804e-121
Cd274	1007.21	1082.69	10673.9	10683.4	294.218	257.283	17457.8	17401.1	3.36827	0	6.01973	0
Cd276	0	0	90.2189	70.6286	2.13202	0	60.0772	63.2163	9.39951	7.99489e-10	5.93194	1.00452e-07
Cd28	7065.5	7186.45	270.657	277.991	6218.02	6076.67	800.314	820.702	-4.68526	0	-2.88805	0
Cd2ap	1102.87	1110.21	2155.88	2275.08	827.222	805.885	2368.76	2445.47	1.01216	8.96852e-32	1.59499	1.5798e-128
Cd300a	18.5034	20.3379	2251.96	2240.28	11.7261	6.0066	2655.2	2708.32	6.89498	1.29978e-260	8.2902	9.11585e-120
Cd300c2	8.72802	14.3562	1254.86	1304.72	4.26403	1.0011	1518.02	1611.46	6.99027	3.78571e-148	9.27835	1.50073e-45
Cd300e	0	0	596.382	627.655	0	0	1527.68	1450.65	12.3401	5.62571e-17	12.9713	8.43198e-19
Cd300lb	2.79297	4.78539	366.734	309.652	0	1.0011	315.405	302.773	6.68524	1.32349e-44	9.2607	2.86964e-10
Cd300ld	10.1245	4.78539	1110.75	1009.68	1.06601	0	1216.56	1335.3	6.91946	2.84179e-122	11.3056	8.42907e-15
Cd300ld2	0	0	10.5451	35.8362	0	0	12.8737	19.963	7.64628	1.52113e-05	6.46679	0.000127672
Cd300ld3	0	0	63.2704	73.412	0	0	141.611	147.505	9.18221	2.22317e-09	9.60625	1.18961e-10
Cd300ld4	0	0	42.1802	139.518	0	0	157.703	72.0887	9.58901	4.18494e-06	9.27588	7.18896e-08
Cd300lf	22.3437	22.7306	2161.74	2048.93	22.3862	20.022	2587.61	2636.23	6.55723	1.2447e-257	6.98215	2.03547e-196
Cd300lg	0	0	123.026	120.034	0	0	60.0772	48.7985	10.0046	2.98218e-11	8.19809	9.32159e-08
Cd302	3.84033	8.37443	617.472	583.817	7.46205	5.0055	621.155	616.636	6.92655	1.60765e-73	6.67727	4.5732e-53
Cd320	267.077	246.447	90.2189	102.29	197.211	212.233	56.8588	70.9797	-1.39647	2.20567e-11	-1.6462	9.52877e-13
Cd33	17.1069	17.9452	303.463	259.551	2.13202	1.0011	159.848	133.087	4.01886	3.58506e-44	6.59839	8.24661e-14
Cd34	6.98241	8.37443	826.03	779.002	8.52806	10.011	121.227	117.56	6.78024	1.1137e-102	3.71946	1.40295e-17
Cd36	118.352	149.543	2572.99	2505.75	114.063	94.1034	2708.84	2616.27	4.29972	1.82473e-230	4.71605	0
Cd37	1411.84	1415.28	452.266	472.481	924.229	879.967	384.065	399.261	-1.59906	2.92384e-56	-1.16848	3.59459e-31
Cd38	97.7538	113.653	1564.18	1631.76	266.502	271.298	2167.07	2223.66	3.96212	1.7444e-189	3.06407	1.294e-269
Cd3d	3372.16	3580.67	398.369	372.279	3955.95	4013.41	654.412	684.288	-3.17371	7.66469e-239	-2.5389	0
Cd3e	3385.77	3435.91	257.768	262.683	3838.69	4057.46	629.738	637.708	-3.70026	0	-2.60441	0
Cd3g	4016.28	4200.37	536.626	498.575	4403.68	4452.89	976.254	926.063	-2.98885	1.01786e-241	-2.18354	1.06307e-298
Cd4	0.698241	3.58904	67.9571	81.4142	9.59407	9.0099	49.3491	46.5804	5.67849	1.1481e-12	2.4026	8.1317e-06
Cd40	19.5508	8.37443	3045.18	2955.27	1.06601	3.0033	2848.3	2874.68	7.63271	4.73616e-63	10.4715	9.75995e-47
Cd44	1992.43	2106.77	13722.6	13431.6	2722.58	2643.9	13210.5	13122.4	2.73906	0	2.3302	0
Cd5	1964.85	1887.83	91.3905	94.9833	1216.31	1287.41	199.542	208.503	-4.35342	8.15888e-256	-2.58281	9.92153e-124
Cd52	5125.09	5226.84	6386.79	6042.75	3645.75	3501.85	7020.45	7195.56	0.271447	0.000169951	1.02729	2.01535e-113
Cd53	7235.53	7875.55	12895.4	12649.5	6775.55	6826.5	13708.3	13800	0.766879	7.84898e-25	1.05112	8.08633e-168
Cd55	347.724	303.872	380.794	353.839	181.221	194.213	74.0237	69.8706	0.165496	0.327555	-1.34847	3.0021e-09
Cd59a	3.49121	2.39269	128.884	111.336	8.52806	6.0066	61.15	74.3068	5.23181	5.5539e-22	3.26048	9.29071e-10
Cd5l	0.349121	0	248.395	244.939	2.13202	0	152.339	148.614	9.70674	4.21791e-14	7.22128	1.31358e-11
Cd6	3067.37	2984.88	221.446	163.176	1843.13	1883.07	428.05	449.168	-4.0074	3.75404e-163	-2.05205	1.39837e-142
Cd63	69.1259	51.4429	8732.48	9048.81	68.2245	79.0869	4722.5	4737.89	7.12513	0	6.03698	0
Cd68	9695.43	1489.45	11570.3	24322	2214.1	2126.34	10756	10963	1.68819	0.170652	2.35849	0
Cd69	2196.67	2378.34	724.094	671.146	762.196	798.877	757.402	827.357	-1.70895	1.18233e-64	0.0560601	0.56287
Cd7	3.84033	3.58904	72.6438	84.5456	94.8747	121.133	82.6061	96.488	4.3978	3.31473e-15	-0.237786	0.37963
Cd72	87.2802	88.5296	2297.65	2126.16	224.928	259.285	2639.11	2693.9	4.66224	3.38892e-274	3.49388	0
Cd74	337.251	346.94	80046.4	79350.7	308.076	234.257	93866.3	94063.6	7.87789	0	8.47313	0
Cd80	960.082	986.986	1045.13	1107.79	450.921	445.489	919.396	979.297	0.158354	0.124038	1.11776	2.18982e-31
Cd82	3320.49	3122.46	831.888	882.684	1455.1	1436.58	1116.79	1103.51	-1.89869	2.39215e-98	-0.345859	7.71086e-07
Cd83	308.274	366.082	5737.68	5903.23	275.03	262.288	5582.89	5661.74	4.14241	0	4.42327	0
Cd84	543.93	477.342	2333.97	2376.32	557.522	575.632	2059.79	2099.45	2.20078	2.27237e-96	1.91062	2.14024e-150
Cd86	30.7226	27.516	4364.48	4274.94	13.8581	13.0143	4171.07	4203.33	7.18119	0	8.32023	5.24009e-183
Cd8a	12917.8	13015.1	656.137	698.632	8158.16	8359.18	1597.41	1597.04	-4.24219	0	-2.33528	0
Cd8b1	6062.83	5908.76	282.373	257.464	6226.55	6394.02	670.504	666.543	-4.48146	0	-3.20356	0
Cd9	174.211	149.543	810.798	892.773	498.892	486.534	554.641	582.255	2.38524	8.58466e-56	0.241388	0.0273766
Cd93	60.0487	69.3881	2138.3	1970.29	139.647	151.166	2287.22	2480.96	5.034	2.99364e-255	4.0687	0
Cd96	1105.67	1160.46	60.927	45.2301	977.529	1057.16	90.1158	102.033	-4.48261	3.59422e-141	-3.37092	5.1021e-124
Cd99l2	146.631	157.918	371.42	353.491	325.132	322.354	289.658	299.445	1.26547	1.10486e-13	-0.101306	0.491817
Cdan1	481.437	466.575	194.498	185.096	647.067	642.706	198.469	228.466	-1.32116	2.26131e-18	-1.56083	5.9809e-35
Cdc14b	446.176	500.073	172.236	129.08	819.76	810.891	130.882	109.797	-1.66618	1.71833e-16	-2.72356	1.18787e-86
Cdc16	973.348	1046.8	419.459	482.571	1175.81	1179.3	490.273	515.712	-1.14108	6.66264e-19	-1.1924	7.55516e-42
Cdc20	900.382	824.283	242.536	258.508	1412.46	1464.61	256.401	225.139	-1.77184	1.89831e-40	-2.54286	3.27409e-138
Cdc25a	1113	1174.81	393.682	362.537	848.542	854.939	341.153	353.789	-1.59572	5.82953e-43	-1.25868	1.08207e-33
Cdc25b	505.876	483.324	278.858	265.118	1618.2	1700.87	284.294	296.118	-0.86352	1.28074e-09	-2.48109	4.58782e-157
Cdc25c	130.222	110.064	101.936	111.336	314.472	330.363	71.8781	68.7615	-0.170621	0.526584	-2.16173	4.75787e-28
Cdc34	1696.38	1452.36	720.579	768.564	1172.61	1127.24	656.558	690.943	-1.0733	2.40489e-18	-0.736149	1.29708e-18
Cdc34b	18.1543	57.4246	12.8884	3.47924	43.7063	37.0407	24.6746	31.0536	-2.28762	0.0110017	-0.499971	0.273996
Cdc37	3822.52	3779.26	1741.11	1884.01	3841.89	3898.28	2091.97	2165.99	-1.05662	4.27203e-38	-0.827317	2.75136e-56
Cdc42	8783.88	9094.63	16017.9	16490.6	7837.29	7760.52	16984.7	16628.1	0.871734	7.73551e-44	1.14287	2.20315e-200
Cdc42bpa	18.8525	26.3196	243.708	255.376	50.1024	37.0407	217.78	215.157	3.55887	1.48991e-35	2.35212	1.32327e-21
Cdc42bpb	55.5102	77.7625	986.549	1008.28	36.2443	31.0341	1094.26	1123.47	3.98547	7.14648e-106	5.08103	1.19707e-142
Cdc42bpg	828.114	821.89	262.455	219.192	411.479	405.445	171.649	185.213	-1.78891	7.56085e-35	-1.1601	3.71738e-15
Cdc42ep2	11.521	4.78539	154.661	192.402	13.8581	9.0099	207.052	229.575	4.23049	4.794e-24	4.29794	2.01578e-31
Cdc42ep3	94.2626	106.475	209.73	233.109	140.713	127.14	202.761	174.122	1.17178	7.0324e-08	0.52942	0.00851457
Cdc42ep4	27.5805	20.3379	1531.38	1611.93	29.8482	36.0396	2144.54	2170.42	5.94754	2.07567e-212	6.06426	1.27876e-219
Cdc42ep5	0	0	222.618	216.757	0	1.0011	118.009	150.832	10.8587	2.95678e-13	8.0587	6.06423e-08
Cdc42se2	1393.34	1491.84	2964.33	2982.06	1710.94	1588.75	2863.32	3024.4	1.05596	1.39349e-37	0.870876	1.15819e-47
Cdc45	819.386	813.516	243.708	269.641	1123.57	1197.32	274.639	288.355	-1.64926	6.22938e-37	-2.00907	2.57665e-85
Cdc6	942.975	934.347	155.833	186.835	1180.07	1192.31	224.217	236.229	-2.42045	1.64766e-63	-2.33058	6.27299e-107
Cdc7	502.385	482.128	124.197	120.034	750.469	733.806	166.285	151.941	-2.01142	9.35099e-36	-2.18566	2.74685e-63
Cdca2	452.46	538.356	149.974	146.128	1254.69	1312.44	149.12	136.414	-1.72921	6.46865e-23	-3.1327	3.00458e-150
Cdca3	698.94	663.972	595.21	618.957	1654.44	1573.73	454.87	474.676	-0.159551	0.186583	-1.761	2.501e-99
Cdca4	1345.16	1327.94	517.88	510.057	1309.06	1256.38	541.768	530.129	-1.37322	4.07627e-43	-1.22351	5.61656e-47
Cdca5	525.077	563.479	201.528	181.616	879.456	916.006	204.906	221.811	-1.50751	8.98213e-23	-2.03871	3.99696e-69
Cdca7	930.057	835.05	119.511	109.596	892.249	913.003	218.853	248.429	-2.9578	1.25954e-82	-1.91577	1.89917e-63
Cdca7l	1077.39	1070.73	503.82	553.547	1115.04	1169.28	478.472	470.24	-1.00662	2.37459e-19	-1.23278	2.22983e-42
Cdca8	860.582	857.78	458.124	446.039	1610.74	1710.88	444.142	460.259	-0.921467	2.0097e-16	-1.84231	7.81537e-108
Cdh1	0.349121	0	113.652	115.859	2.13202	2.0022	67.5868	47.6895	8.60559	4.9708e-11	4.83884	9.7008e-09
Cdh11	1.04736	3.58904	21.0901	13.2211	5.33004	4.0044	7.50965	4.43623	3.14225	0.0028193	0.395691	0.744614
Cdh13	0.698241	0	64.442	78.2829	0	0	41.8395	33.2717	7.08295	3.30153e-10	7.66257	9.85312e-07
Cdh19	0	0	704.176	681.583	0	0	626.519	676.525	12.5158	1.91798e-17	11.7783	1.10522e-15
Cdh2	0.349121	0	180.438	209.45	0	0	135.174	130.869	9.37474	4.2269e-13	9.48651	2.1457e-10
Cdh24	52.7172	70.5844	18.7468	21.5713	34.1122	36.0396	22.5289	31.0536	-1.56489	0.00031088	-0.35565	0.465123
Cdh5	0	0	44.5236	33.4007	1.06601	1.0011	38.6211	31.0536	8.35165	1.45286e-07	5.11207	1.28302e-05
Cdhr4	0	2.39269	24.6051	25.0505	1.06601	0	18.2377	24.3993	5.17497	7.75482e-05	5.39956	0.000912588
Cdip1	288.025	309.854	629.189	630.786	309.142	303.333	546.059	517.93	1.09195	1.05321e-16	0.832321	6.07956e-12
Cdk1	981.378	1068.34	910.39	839.889	1658.71	1638.8	725.218	672.089	-0.219964	0.0567199	-1.20304	2.83167e-57
Cdk14	3.84033	8.37443	439.378	460.999	3.19802	4.0044	709.125	674.307	6.50793	7.42064e-62	7.61589	5.97525e-42
Cdk15	0.698241	0	385.481	406.723	0	0	183.45	174.122	9.5299	6.30767e-20	9.91315	2.58177e-11
Cdk17	2048.29	2050.54	742.841	815.186	1068.14	1143.26	873.265	819.593	-1.37997	8.60127e-47	-0.350515	2.14092e-05
Cdk18	3.14209	5.98173	25.7768	14.2649	3.19802	3.0033	18.2377	16.6359	2.22292	0.00963172	2.52785	0.00656814
Cdk2	824.274	782.411	3028.78	3103.83	1196.06	1065.17	2190.67	2207.02	1.93589	2.68034e-114	0.995742	1.09862e-49
Cdk20	31.0717	45.4612	137.086	141.953	37.3103	35.0385	128.737	127.542	1.93337	1.18026e-09	1.86064	2.56885e-10
Cdk5r1	13.9648	14.3562	42.1802	42.0988	13.8581	7.0077	19.3105	33.2717	1.58542	0.00116881	1.37328	0.0362774
Cdk5rap2	572.558	513.233	2011.76	1807.81	651.331	600.66	1607.06	1539.37	1.81114	4.27375e-54	1.36568	6.59864e-68
Cdk6	5003.25	5152.66	870.553	880.944	2512.58	2566.82	974.109	1029.21	-2.52561	1.2661e-242	-1.3076	2.43065e-93
Cdk8	1329.45	1167.63	431.176	429.686	808.034	821.903	429.123	464.695	-1.53362	8.15429e-36	-0.832222	1.34338e-16
Cdkal1	313.161	305.068	154.661	144.736	251.578	241.265	184.523	177.449	-1.04846	3.01253e-09	-0.409579	0.0169914
Cdkl3	75.7592	98.1004	106.622	115.511	58.6304	49.0539	108.354	108.688	0.392262	0.17728	1.04812	0.00023355
Cdkl4	9.77538	8.37443	2.34335	3.13132	28.7822	27.0297	6.43684	7.7634	-1.68516	0.119447	-1.94055	0.00418037
Cdkl5	23.7402	19.1415	60.927	69.9328	43.7063	41.0451	49.3491	57.671	1.59353	9.49051e-05	0.371513	0.329621
Cdkn1a	7194.68	7375.48	9189.43	8960.09	2841.98	2852.13	7109.49	7129.02	0.325239	3.97822e-07	1.35735	6.86835e-200
Cdkn1c	4.53857	7.17808	49.2103	35.8362	2.13202	3.0033	15.0193	12.1996	2.95362	2.34845e-06	2.43721	0.0195864
Cdkn2aipnl	1023.97	1094.66	558.888	482.223	1128.9	1161.28	493.491	504.621	-1.02476	1.19482e-15	-1.16338	2.94488e-39
Cdkn2c	120.447	126.813	677.227	727.857	330.462	322.354	605.063	672.089	2.52703	3.51977e-63	1.00311	3.99171e-18
Cdkn2d	725.473	765.662	338.614	311.74	905.041	931.023	277.857	317.19	-1.19494	2.36241e-20	-1.59148	3.01649e-49
Cdkn3	50.6225	63.4064	145.288	131.863	183.353	175.192	92.2614	103.142	1.313	2.99817e-06	-0.840929	9.53784e-05
Cdnf	21.2964	20.3379	10.5451	3.82717	22.3862	18.0198	7.50965	7.7634	-1.66192	0.0403261	-1.36739	0.0629861
Cdon	275.456	306.265	84.3605	86.6331	313.406	290.319	50.4219	57.671	-1.74767	6.12851e-18	-2.44717	7.51251e-30
Cdr2l	12.5683	13.1598	127.712	119.338	30.9142	45.0495	78.3149	83.1793	3.27841	3.17013e-19	1.11922	0.00108666
Cds1	0	0	228.476	230.326	0	2.0022	249.964	242.884	10.9228	2.06965e-13	7.93467	5.26403e-14
Cds2	2907.48	2911.91	1041.62	1043.42	2315.37	2384.62	1118.94	1117.93	-1.47257	3.37142e-78	-1.03622	4.656e-61
Cdyl2	206.33	195.004	59.7553	59.495	235.588	267.294	94.407	100.924	-1.74769	8.86723e-14	-1.33039	1.38137e-11
Ceacam1	5.58593	5.98173	94.9056	78.9788	22.3862	39.0429	105.135	100.924	3.92684	1.54999e-15	1.775	1.51408e-07
Ceacam16	4.18945	8.37443	14.0601	9.39395	4.26403	5.0055	20.3833	14.4177	0.966561	0.300022	1.94298	0.0225045
Ceacam19	0	1.19635	23.4335	37.5758	0	0	32.1842	31.0536	6.63935	4.86688e-06	7.41372	2.77377e-06
Cebpa	2.79297	2.39269	835.403	858.329	0	2.0022	821.77	781.885	8.30129	1.19188e-66	9.63645	1.80026e-20
Cebpb	246.479	232.091	4111.4	4186.22	132.185	127.14	4724.64	4740.11	4.11136	0	5.22564	0
Cebpd	2.79297	1.19635	387.824	379.933	2.13202	3.0033	231.726	212.939	7.32012	4.98771e-44	6.46418	3.1869e-21
Cebpe	0	0	26.9485	36.88	0	1.0011	28.9658	19.963	8.09051	5.34854e-07	5.60397	0.000499895
Cela1	51.6699	53.8356	134.742	160.045	30.9142	19.0209	69.7325	105.36	1.50711	3.83359e-08	1.84914	1.39653e-06
Celf4	7.68065	8.37443	38.6652	33.0528	9.59407	8.0088	42.9123	44.3623	2.17313	0.000174122	2.34727	2.81611e-05
Celf5	104.387	82.5479	2.34335	2.08754	38.3763	37.0407	0	0	-5.44162	4.89851e-17	-7.51886	1.56659e-06
Celsr1	546.723	550.319	9.37339	18.7879	358.179	367.404	37.5482	43.2532	-5.09116	4.43712e-79	-3.13299	1.68511e-44
Celsr2	56.5575	69.3881	85.5322	84.8935	109.799	93.1023	31.1114	44.3623	0.466218	0.138287	-1.39292	1.73604e-05
Celsr3	0.349121	1.19635	18.7468	22.2671	3.19802	4.0044	27.893	17.7449	5.17038	6.22331e-05	2.69708	0.00137287
Cemip2	234.958	259.607	1174.02	1127.97	248.38	256.281	1438.63	1440.67	2.23938	1.7372e-74	2.54699	7.80617e-151
Cenpa	660.885	681.917	752.214	722.291	2562.68	2439.68	887.211	881.7	0.142505	0.216921	-1.46431	1.81565e-109
Cenpc1	646.571	711.826	290.575	276.6	756.866	764.84	426.977	370.425	-1.25202	5.73868e-20	-0.896417	7.13015e-17
Cenpe	1488.3	1454.76	843.605	783.177	3381.38	3494.84	724.145	774.122	-0.854	7.72323e-18	-2.16381	1.708e-243
Cenpf	1074.59	1179.6	502.648	478.048	2412.38	2311.54	447.361	429.205	-1.19285	5.30322e-25	-2.39436	1.1359e-209
Cenph	319.096	399.58	243.708	215.713	540.466	487.535	148.047	156.377	-0.634638	0.00121356	-1.72034	4.4445e-32
Cenpi	296.403	312.246	85.5322	121.426	562.852	555.61	154.484	170.795	-1.51166	9.95753e-11	-1.74729	2.2459e-36
Cenpk	264.633	271.571	188.639	164.916	514.882	454.499	107.281	139.741	-0.604666	0.00121839	-1.93852	2.87892e-33
Cenpl	388.571	421.114	246.051	202.84	578.842	538.592	217.78	222.92	-0.855353	1.4839e-06	-1.30688	7.23731e-24
Cenpm	99.4994	90.9223	82.0171	81.4142	182.287	176.194	74.0237	73.1978	-0.222151	0.437077	-1.24848	4.65655e-08
Cenpn	178.052	174.667	147.631	88.3727	340.056	345.379	106.208	127.542	-0.601682	0.0552622	-1.51828	1.59827e-18
Cenpo	235.656	228.502	128.884	98.8105	341.122	343.377	115.863	114.233	-1.04834	5.10278e-06	-1.53762	2.52435e-19
Cenpp	165.832	144.758	100.764	66.4535	467.977	445.489	94.407	80.9612	-0.92599	0.00241585	-2.34431	1.44184e-42
Cenpq	399.743	458.201	228.476	237.632	571.38	601.661	278.93	281.701	-0.859833	1.14805e-07	-1.03041	1.39806e-17
Cenps	109.275	104.082	33.9785	62.2784	167.363	183.201	64.3684	52.1257	-1.0936	0.00427326	-1.55338	2.82138e-10
Cenpt	345.28	331.388	185.124	165.264	405.083	398.438	192.032	176.34	-0.957276	3.64253e-08	-1.08938	1.46538e-13
Cenpw	133.713	145.954	216.76	202.84	303.812	297.327	153.411	139.741	0.597671	0.00326983	-1.00018	3.08557e-09
Cep112	3.14209	7.17808	77.3304	63.6701	6.39605	4.0044	25.7474	43.2532	3.99529	1.27231e-11	2.77014	7.34307e-05
Cep126	8.3789	7.17808	52.7253	35.4883	0	2.0022	46.1307	59.8891	2.45924	2.12044e-05	5.7194	4.23029e-07
Cep128	240.893	247.644	179.266	129.08	508.486	491.54	208.125	219.593	-0.678787	0.0042674	-1.1903	5.67966e-19
Cep152	331.315	370.867	103.107	109.248	563.918	519.571	138.392	169.686	-1.70233	1.38039e-19	-1.78017	2.59706e-34
Cep162	432.91	403.169	188.639	202.84	488.232	436.479	253.182	214.048	-1.08326	1.34585e-11	-0.948058	1.31232e-11
Cep170b	926.217	854.191	219.103	209.45	746.205	724.796	209.197	216.266	-2.05702	5.36905e-54	-1.75463	1.32438e-47
Cep19	334.108	328.995	132.399	146.824	448.789	423.465	107.281	124.214	-1.22794	5.22155e-12	-1.87938	4.39747e-31
Cep192	1426.86	1336.32	393.682	375.758	1930.54	2058.26	553.568	588.909	-1.84482	2.16111e-62	-1.76943	2.24338e-118
Cep250	2134.87	2206.06	461.639	433.166	1650.18	1576.73	593.262	628.835	-2.27727	3.43842e-121	-1.36577	3.53802e-68
Cep290	329.57	428.292	637.39	592.167	232.39	216.238	501.001	527.911	0.718851	3.4188e-05	1.23324	4.51416e-21
Cep295	636.098	643.634	391.339	409.159	986.057	963.058	487.054	431.423	-0.663741	7.56438e-08	-1.0495	3.34118e-27
Cep295nl	0	0	14.0601	19.4838	0	1.0011	12.8737	5.54529	7.16305	3.50216e-05	4.19788	0.0222561
Cep44	266.03	262	152.318	124.905	340.056	351.386	137.319	133.087	-0.94356	3.799e-06	-1.31935	1.04376e-15
Cep55	700.336	701.059	437.034	390.023	1423.12	1489.64	364.754	362.662	-0.762775	4.30095e-09	-1.96662	2.61631e-105
Cep57l1	245.083	290.712	140.601	137.082	411.479	358.394	142.683	124.214	-0.931658	3.64634e-06	-1.49147	1.86311e-19
Cep68	565.925	587.406	192.154	204.927	709.961	641.705	223.144	190.758	-1.51954	3.23867e-26	-1.67061	3.09888e-38
Cep70	84.1381	58.621	185.124	217.105	165.231	163.179	166.285	179.667	1.47164	1.15848e-07	0.109915	0.587001
Cep72	85.5346	61.0137	30.4635	32.009	217.466	209.23	64.3684	48.7985	-1.23799	0.00159038	-1.87738	1.41967e-15
Cep78	139.299	168.685	66.7854	49.7532	195.079	212.233	92.2614	66.5434	-1.41792	1.50505e-06	-1.32218	3.96843e-09
Cep85	510.763	486.913	165.206	182.312	728.083	706.776	187.741	221.811	-1.5038	6.00929e-22	-1.77468	1.53892e-45
Cep85l	53.4155	65.7991	285.888	292.604	87.4126	90.099	325.061	323.845	2.32515	1.92391e-25	1.90484	1.92841e-25
Cep97	493.307	502.466	77.3304	78.2829	554.324	584.642	85.8246	90.9427	-2.66655	5.89595e-54	-2.65346	1.85296e-60
Cept1	1298.03	1418.87	2010.59	2032.57	1149.16	1224.34	2502.86	2666.17	0.587053	1.77384e-10	1.15721	7.41851e-74
Cercam	200.046	177.059	32.8069	42.0988	358.179	375.412	33.257	35.4898	-2.28926	2.34513e-16	-3.38134	5.80173e-47
Cerk	262.888	291.909	1259.55	1212.17	409.347	386.424	1300.24	1330.87	2.1763	8.44742e-74	1.761	4.45006e-86
Cers2	1790.99	1776.57	2785.07	2765.65	1297.33	1292.42	3004.93	3156.38	0.644944	1.21028e-17	1.28541	7.42596e-105
Cers6	389.968	411.543	2261.33	2240.63	449.855	410.451	3662.56	3709.8	2.50511	5.52108e-152	3.1357	0
Cetn4	235.307	212.95	59.7553	57.0596	156.703	125.137	43.9851	42.1442	-1.94637	6.16065e-17	-1.6736	3.8013e-09
Cfap126	1.7456	0	33.9785	43.1426	5.33004	4.0044	34.3298	41.0351	4.95647	8.51551e-08	3.05231	9.53267e-06
Cfap300	27.9297	35.8904	77.3304	112.727	27.7162	40.044	89.043	77.634	1.63279	2.32193e-05	1.33034	0.000131357
Cfap36	391.713	393.598	952.571	942.874	408.281	422.464	699.47	669.871	1.27898	1.48724e-30	0.755996	1.01967e-12
Cfap43	414.406	429.488	708.862	750.124	412.545	438.482	1108.21	1119.04	0.804805	3.00449e-11	1.42238	1.29929e-53
Cfap45	2.09472	3.58904	17.5751	19.8317	3.19802	5.0055	8.58246	9.98151	2.86001	0.00127964	1.20816	0.254298
Cfap54	46.0839	41.8721	843.605	847.543	38.3763	45.0495	631.883	613.309	4.24602	7.13525e-132	3.93199	1.33464e-88
Cfap97	571.86	623.297	195.669	173.962	584.172	543.597	183.45	176.34	-1.69551	4.9998e-28	-1.61239	1.5154e-32
Cfb	0.698241	0	89.0472	216.061	0	0	158.775	168.577	8.19257	1.55088e-12	9.78538	4.90627e-11
Cfh	0	0	492.103	456.129	0	0	285.367	242.884	11.9667	5.352e-16	10.4765	1.45358e-12
Cfl2	277.202	278.749	1108.4	1000.63	214.268	227.25	674.796	715.342	1.92777	1.42848e-52	1.68885	4.47444e-44
Cflar	1595.13	1512.18	3584.15	3577.36	986.057	1065.17	4171.07	4426.25	1.2091	1.80224e-53	2.10155	4.38056e-261
Cfp	50.6225	35.8904	4887.05	4725.51	30.9142	30.033	4355.6	4359.7	6.69855	0	7.19561	1.37611e-298
Cgas	180.146	192.612	433.519	415.421	228.126	232.255	452.725	515.712	1.20098	2.27674e-14	1.10722	2.18729e-16
Cgnl1	1.7456	0	30.4635	34.0966	3.19802	3.0033	10.7281	13.3087	4.70555	8.71391e-07	1.98972	0.0546103
Cgrrf1	127.778	149.543	324.554	302.346	213.202	181.199	255.328	211.83	1.19913	3.20326e-10	0.281535	0.120023
Ch25h	0.698241	1.19635	772.133	752.908	2.13202	1.0011	834.644	760.813	9.88103	6.91116e-31	9.04392	1.73011e-26
Chac1	2.44384	3.58904	85.5322	82.8059	33.0462	15.0165	53.6403	69.8706	4.93788	2.0158e-16	1.40328	0.0012068
Chadl	3.84033	7.17808	17.5751	23.3109	2.13202	3.0033	17.1649	13.3087	2.02663	0.0101114	2.60015	0.0103171
Chaf1a	1342.02	1347.09	414.772	370.887	1841	1788.96	395.866	401.479	-1.77938	4.47741e-55	-2.15149	1.06787e-147
Chaf1b	454.206	368.475	393.682	395.242	602.294	642.706	299.313	304.991	-0.0644231	0.720703	-1.00822	8.59543e-18
Champ1	949.259	976.219	315.18	290.865	621.483	617.678	384.065	342.699	-1.66837	3.38664e-43	-0.733971	1.29816e-10
Chchd10	254.509	282.338	1619.25	1591.06	977.529	1012.11	1022.39	931.608	2.6034	6.45739e-118	0.00923138	0.918441
Chchd5	187.827	181.845	119.511	113.771	251.578	233.256	101.917	108.688	-0.664852	0.00177327	-1.16775	1.69394e-09
Chchd6	54.4628	55.0319	251.91	231.717	120.459	115.126	224.217	201.848	2.14737	4.81571e-21	0.890882	5.30986e-06
Chchd7	100.198	124.42	288.232	375.41	188.683	215.236	261.765	220.702	1.60212	8.86839e-12	0.2912	0.0981659
Chd1l	595.6	612.529	312.837	295.736	711.027	684.752	273.566	307.209	-0.985725	8.34373e-14	-1.2304	2.54533e-26
Chd8	2106.24	2007.47	862.352	894.513	2057.4	2184.4	1065.3	1172.27	-1.21846	4.13962e-41	-0.888448	5.86394e-39
Chek1	689.862	674.739	201.528	188.923	793.11	837.92	197.396	191.867	-1.80805	2.9065e-39	-2.03193	5.23661e-63
Chek2	207.727	166.292	128.884	137.778	203.607	257.283	83.6789	89.8336	-0.489602	0.0374258	-1.37605	1.08059e-10
Cherp	1521.12	1427.24	603.412	583.121	1246.16	1287.41	727.363	730.869	-1.31126	2.28271e-37	-0.762079	6.13295e-22
Chfr	1301.87	1362.64	582.322	570.248	1335.71	1335.47	761.693	734.196	-1.20074	7.4765e-33	-0.80112	4.92381e-25
Chic1	9.42626	7.17808	355.017	289.821	15.9901	12.0132	355.099	290.573	5.1959	8.9886e-51	4.56847	2.51675e-44
Chil1	0	0	672.541	628.003	0	0	822.843	801.848	12.4229	3.4479e-17	12.0969	1.71521e-16
Chil3	11.521	8.37443	1866.48	1808.51	1.06601	1.0011	1825.92	1837.71	7.42268	1.08619e-186	10.828	1.2e-25
Chka	133.364	155.525	1038.1	970.012	216.4	179.197	701.616	736.414	2.82888	6.28042e-85	1.89929	3.17441e-51
Chkb	24.0893	13.1598	64.442	52.5365	23.4522	28.0308	32.1842	43.2532	1.57444	0.00123263	0.583451	0.218096
Chl1	3.14209	4.78539	55.0687	64.366	23.4522	18.0198	20.3833	13.3087	4.05264	2.3377e-11	-0.260628	0.686102
Chm	1657.28	1792.13	413.601	446.735	1105.45	1084.19	534.258	541.22	-1.98427	2.86613e-74	-0.990537	2.74798e-29
Chmp2a	833.002	861.369	2588.23	2486.27	956.209	957.051	2455.66	2533.09	1.59216	1.32749e-75	1.41764	4.15927e-110
Chmp2b	671.01	695.077	1867.65	1864.53	777.12	771.848	1487.98	1648.06	1.46148	1.1523e-58	1.05243	1.06503e-42
Chmp3	924.471	898.456	2290.62	2268.81	885.852	929.02	1891.36	1856.56	1.32751	2.20108e-55	1.08094	2.05627e-56
Chmp4b	2803.79	2587.7	7612.36	7750.01	2318.57	2267.49	6834.85	6866.17	1.51586	4.25096e-85	1.61426	1.06592e-259
Chmp5	1239.03	1293.25	2162.91	1903.15	891.182	946.039	1788.37	1875.42	0.689656	8.24321e-11	1.03016	1.27592e-49
Chmp6	256.604	247.644	645.592	599.821	277.162	301.331	547.132	543.438	1.30364	4.3876e-21	0.949006	6.83238e-15
Chn1	4.53857	3.58904	39.8369	37.5758	4.26403	6.0066	19.3105	24.3993	3.1982	6.78329e-07	2.11928	0.00638132
Chn2	4.18945	8.37443	192.154	149.607	4.26403	6.0066	129.81	148.614	4.98107	8.83826e-27	4.78858	1.09031e-19
Chordc1	2895.96	3099.73	1217.37	1312.72	1909.22	1851.03	1396.79	1455.08	-1.23045	1.22877e-41	-0.363787	1.24415e-08
Chp2	0	0	96.0772	89.0686	0	0	19.3105	12.1996	9.60955	2.37289e-10	6.41002	0.000158531
Chpt1	82.7416	99.2968	923.279	959.923	214.268	248.273	939.779	926.063	3.41911	1.90495e-106	2.04544	8.54257e-74
Chrdl1	0	0	194.498	166.656	0	0	31.1114	27.7264	10.5705	1.56024e-12	7.30993	4.30687e-06
Chrm3	0.698241	5.98173	4.68669	6.61056	3.19802	1.0011	18.2377	24.3993	0.96124	0.524687	3.39569	0.000655223
Chrm4	20.5981	21.5342	3.51502	3.82717	79.9506	70.077	3.21842	2.21811	-2.49191	0.00147657	-4.7467	2.00256e-10
Chrna5	0	0	14.0601	12.5253	8.52806	14.0154	10.7281	7.7634	6.80777	0.000135346	-0.252529	0.774986
Chrnb1	95.6591	66.9954	21.0901	41.055	55.4324	62.0682	17.1649	17.7449	-1.33956	0.00389656	-1.71671	0.0001084
Chst1	0.349121	0	10.5451	13.917	0	0	4.29123	3.32717	5.40391	0.000894347	4.36114	0.0567901
Chst10	176.655	142.365	21.0901	11.8294	185.485	153.168	20.3833	24.3993	-3.39562	2.07838e-18	-2.88427	1.62727e-19
Chst11	1059.58	1045.61	120.682	117.946	725.951	668.735	211.343	173.013	-3.13882	2.84956e-122	-1.82245	3.65005e-44
Chst12	730.011	699.863	212.073	207.363	559.654	540.594	257.474	242.884	-1.76718	9.70846e-40	-1.10106	2.39976e-18
Chst14	42.5927	35.8904	243.708	263.379	62.8945	60.066	215.634	257.301	2.66942	1.15012e-27	1.9785	5.90161e-19
Chst15	97.0555	100.493	67.9571	44.1864	155.637	141.155	40.7667	43.2532	-0.847379	0.0150559	-1.78537	1.09457e-10
Chst2	106.482	101.689	30.4635	38.2717	83.1486	93.1023	111.572	117.56	-1.56082	1.62915e-06	0.412419	0.104791
Chst7	0.698241	0	12.8884	7.30641	0	0	6.43684	5.54529	4.31226	0.00607474	5.01416	0.0130815
Chsy1	1726.75	1677.28	583.493	597.386	1535.05	1466.61	781.003	841.774	-1.51831	8.54647e-58	-0.852308	1.817e-29
Chsy3	0	0	728.781	728.901	1.06601	0	915.104	795.194	12.5901	1.20699e-17	10.729	1.95566e-13
Chtf18	334.108	299.087	113.652	114.815	524.476	552.607	143.756	124.214	-1.46859	1.07452e-14	-1.97105	2.08534e-40
Ciart	44.3383	35.8904	123.026	140.561	67.1585	81.0891	124.446	119.778	1.70045	1.75987e-08	0.753692	0.00345635
Cib2	2.79297	0	31.6352	29.2256	6.39605	2.0022	27.893	35.4898	4.00125	1.14947e-05	2.96643	8.01984e-05
Ciita	9.77538	10.7671	1509.12	1532.26	9.59407	7.0077	2081.25	2099.45	7.25374	2.17606e-166	8.01834	3.76677e-105
Cilp	0	1.19635	21.0901	16.3524	0	0	30.0386	17.7449	5.8773	0.000128505	7.01091	1.60121e-05
Cip2a	1119.98	1232.24	700.661	665.927	1757.85	1667.83	571.806	598.891	-0.774521	3.3892e-12	-1.5139	5.19791e-84
Cirbp	191.667	189.023	609.27	576.162	205.74	208.229	499.928	552.31	1.64119	2.29314e-30	1.38045	4.1807e-25
Cisd3	525.077	485.717	284.717	335.399	505.288	535.588	175.94	235.12	-0.688402	1.38498e-05	-1.30732	6.73773e-20
Cish	4505.4	4505.44	629.189	600.517	686.509	670.737	463.453	496.858	-2.87138	9.14193e-273	-0.464197	8.68553e-06
Cit	384.033	411.543	112.481	116.555	874.126	906.996	152.339	135.305	-1.77876	1.42362e-24	-2.5945	3.2341e-90
Cited1	0	2.39269	297.605	278.687	4.26403	3.0033	240.309	251.756	8.27901	1.0247e-05	6.12375	7.77628e-26
Cited2	235.307	239.269	1888.74	1913.93	378.433	407.448	2230.37	2272.46	3.01356	1.13406e-182	2.55243	9.11513e-230
Ckap2	444.78	497.68	210.901	192.402	661.991	704.774	169.504	186.322	-1.22018	4.84618e-14	-1.90746	1.00816e-48
Ckap2l	538.344	589.799	365.562	360.101	1319.72	1414.55	288.585	333.826	-0.623835	3.93707e-06	-2.10151	3.56629e-101
Ckap4	45.7348	57.4246	365.562	398.721	86.3466	103.113	300.386	295.009	2.94712	1.68257e-41	1.68499	1.61012e-19
Ckap5	1855.93	1918.94	1144.72	1084.13	3351.53	3415.75	1440.78	1416.27	-0.75427	4.46105e-17	-1.20892	6.3247e-101
Ckb	491.213	447.434	3038.15	3261.09	420.007	401.441	2867.61	3009.98	2.7452	1.60151e-162	2.87463	0
Ckm	16.7578	28.7123	3.51502	9.39395	3.19802	6.0066	4.29123	3.32717	-1.66831	0.0405065	-0.240806	0.86227
Ckmt1	205.283	222.52	0	0	15.9901	14.0154	0	1.10906	-10.8188	3.77618e-13	-4.74475	0.00526053
Cks1b	712.904	678.328	550.687	550.764	1299.46	1388.53	469.889	475.786	-0.332643	0.00470092	-1.47245	8.29551e-64
Cks2	727.917	440.256	202.7	385.152	491.43	480.528	183.45	185.213	-0.981019	0.100044	-1.36338	1.06945e-22
Clasrp	381.24	387.616	164.034	199.708	398.687	416.457	231.726	189.649	-1.05141	4.38537e-09	-0.915917	4.68546e-10
Clba1	34.9121	28.7123	74.9871	67.4973	33.0462	37.0407	56.8588	51.0166	1.13664	0.0020981	0.656709	0.0925689
Clcn2	22.6928	14.3562	7.03004	9.04603	26.6502	41.0451	13.9465	11.0906	-1.19679	0.110042	-1.40079	0.0148918
Clcn3	1467	1521.75	836.575	858.677	2467.81	2359.59	923.687	893.9	-0.805977	4.63899e-18	-1.37364	2.93947e-96
Clcn4	564.179	515.625	1634.48	1580.27	380.565	371.408	1366.76	1431.79	1.57169	1.10013e-50	1.93119	2.02291e-103
Clcn7	468.869	497.68	2421.85	2381.19	332.594	315.346	3162.63	3314.97	2.32813	4.92976e-138	3.35737	0
Cldn10	1.39648	0	7.03004	5.56679	66.0925	68.0748	6.43684	1.10906	2.79097	0.0845712	-4.10299	1.04807e-09
Cldn12	70.1732	87.3333	501.476	521.886	81.0166	90.099	355.099	395.933	2.75001	1.44643e-48	2.16716	1.99577e-33
Clec10a	3.14209	0	3162.35	3274.66	4.26403	4.0044	885.066	855.083	10.3836	6.01185e-98	7.75404	1.28491e-49
Clec12a	15.7104	20.3379	5804.47	5739.01	9.59407	7.0077	6832.71	6731.98	8.42858	0	9.7165	3.09932e-156
Clec1a	0	0	55.0687	25.7464	0	0	38.6211	35.4898	8.39329	2.5154e-07	7.64277	1.05113e-06
Clec1b	2.79297	2.39269	11.7167	12.8732	2.13202	1.0011	8.58246	8.87246	2.2286	0.0242662	2.5233	0.0585794
Clec2d	706.969	836.246	1804.38	1744.14	868.796	795.874	2094.12	2188.17	1.21847	3.45197e-25	1.39902	4.17279e-90
Clec2g	0.349121	1.19635	28.1202	28.8777	0	0	23.6018	9.98151	5.66043	3.68063e-06	6.50295	0.000127188
Clec2i	420.69	425.899	123.026	123.861	410.413	404.444	151.266	158.595	-1.76813	9.20241e-27	-1.36002	3.92503e-19
Clec3b	0	0	533.111	637.397	4.26403	2.0022	90.1158	78.7431	12.2791	9.34312e-17	4.80215	2.2097e-12
Clec4a1	11.8701	9.57077	4024.7	3839.34	2.13202	0	5133.38	5072.83	8.4465	1.18347e-265	12.3061	8.17396e-33
Clec4a2	2.44384	2.39269	2171.11	2036.05	1.06601	1.0011	2209.98	2181.52	9.76178	5.39432e-86	11.0895	7.45189e-27
Clec4a3	4.88769	7.17808	2236.72	2213.49	2.13202	0	2837.57	2737.15	8.68717	2.70666e-144	11.4337	1.75862e-28
Clec4a4	0	0	8.20171	9.39395	0	0	16.0921	8.87246	6.22397	0.00130208	6.07446	0.000542647
Clec4b1	0	0	325.725	369.843	1.06601	0	256.401	285.028	11.5278	7.27626e-15	9.06867	7.02409e-10
Clec4d	163.388	131.598	1005.3	918.172	9.59407	4.0044	853.954	845.102	2.67975	5.48098e-64	7.01856	3.75575e-64
Clec4e	71.5697	70.5844	1408.35	1353.08	13.8581	12.0132	2223.93	2266.91	4.28202	6.6605e-198	7.47773	2.04135e-140
Clec4n	158.85	193.808	1121.29	1050.04	34.1122	22.0242	603.99	607.763	2.65668	5.57941e-73	4.47561	9.82066e-85
Clec5a	35.2612	28.7123	688.944	656.185	0	5.0055	666.213	737.523	4.3431	2.17915e-103	8.14813	3.08165e-10
Clec9a	0	0	376.107	388.631	0	0	461.307	438.078	11.6609	3.15298e-15	11.2439	2.27303e-14
Clic4	1810.54	1680.87	11271.5	12050.4	2070.19	2034.23	12053	11971.2	2.74452	1.70746e-247	2.58454	0
Clic5	54.1137	59.8173	360.875	304.434	112.997	124.136	791.732	868.392	2.5636	2.49175e-30	2.84086	2.29764e-95
Clip2	307.575	299.087	602.24	566.768	198.277	209.23	815.333	835.12	0.947149	1.89835e-12	2.05228	3.96322e-68
Clip3	64.9364	70.5844	12.8884	9.04603	90.6107	74.0814	2.14561	1.10906	-2.6896	7.21141e-09	-5.61793	8.61532e-10
Clip4	0	0	80.8455	66.1056	0	0	8.58246	3.32717	9.27069	1.46093e-09	5.00757	0.0143131
Clk1	1897.47	1963.2	2931.53	3062.78	1544.65	1519.67	3046.77	3136.41	0.646143	2.4704e-16	1.04795	4.37355e-76
Clk4	692.306	692.685	1334.54	1348.21	618.285	550.605	1159.7	1214.42	0.962318	4.6435e-24	1.05833	9.82076e-34
Clmn	0.349121	0	284.717	275.208	0	2.0022	177.013	199.63	9.88839	1.25051e-14	7.54645	1.1657e-12
Clmp	0.349121	1.19635	99.5922	112.727	0	2.0022	39.6939	39.9261	7.60791	2.3742e-12	5.30792	4.53369e-06
Cln3	369.719	328.995	592.867	550.764	190.815	198.218	710.198	692.052	0.704428	9.92251e-07	1.88452	2.35096e-52
Cln8	273.012	275.16	2475.75	2579.86	190.815	189.208	2875.12	2913.49	3.21556	2.66712e-230	3.9643	0
Clock	221.342	203.379	753.386	769.608	208.938	197.217	714.489	755.268	1.83911	1.03481e-42	1.89113	2.53304e-54
Clspn	844.523	836.246	246.051	188.227	1273.88	1358.49	318.624	324.954	-1.97036	3.35779e-32	-1.99755	8.52869e-96
Clstn1	376.352	401.972	179.266	193.794	312.34	373.41	155.557	165.25	-1.03952	1.99173e-10	-1.06232	1.10492e-10
Clstn3	3.84033	2.39269	189.811	228.586	8.52806	14.0154	118.009	113.124	5.93011	1.86355e-33	3.38496	2.91929e-16
Clta	1676.13	1722.74	7073.39	6837.41	2238.62	2286.51	5347.94	5475.42	2.0424	6.05553e-181	1.293	5.11017e-154
Cltb	344.233	345.744	931.48	946.354	331.528	370.407	662.995	685.397	1.45369	2.66115e-37	0.975696	2.43906e-18
Cltc	6319.08	6388.49	11456.6	11105.4	5737.25	5670.23	12336.2	12461.4	0.836238	2.70259e-40	1.15538	5.0262e-191
Clu	2.44384	3.58904	35.1502	28.8777	4.26403	2.0022	10.7281	15.5268	3.50779	3.09577e-06	2.11001	0.0382565
Cluh	2095.77	1966.79	875.24	878.508	1382.61	1378.51	1013.8	1004.81	-1.20622	3.79105e-39	-0.416694	7.01029e-09
Clvs1	0.349121	1.19635	131.227	117.25	0	0	86.8974	70.9797	7.82674	3.574e-13	8.73419	8.0588e-09
Clybl	116.955	116.046	212.073	194.142	378.433	435.478	189.887	167.468	0.801875	0.000129453	-1.15246	4.70534e-14
Cmah	415.454	327.799	239.021	177.441	1280.28	1268.39	67.5868	52.1257	-0.853004	0.000223075	-4.37421	4.71789e-163
Cmbl	0.349121	0	78.5021	98.1146	0	0	56.8588	39.9261	8.23758	5.63155e-10	8.02869	2.06529e-07
Cmc1	210.869	223.717	513.193	441.516	291.02	317.349	428.05	430.314	1.14149	4.42285e-12	0.530939	4.18688e-05
Cmc2	149.773	163.899	190.983	199.013	292.086	292.321	148.047	130.869	0.33499	0.10097	-1.03124	2.28742e-09
Cmklr1	8.72802	13.1598	872.897	847.543	0	4.0044	1189.74	1227.73	6.45497	3.51069e-117	9.22839	2.52543e-36
Cmpk1	1605.61	1528.93	5474.06	5750.84	1503.07	1514.66	5401.58	5310.17	1.84623	4.36235e-123	1.86276	3.65614e-282
Cmpk2	54.1137	41.8721	3994.23	3996.95	130.053	139.153	4490.77	4440.66	6.30768	0	5.08593	0
Cmtm3	86.931	87.3333	2195.72	2204.8	50.1024	42.0462	2271.13	2334.57	4.66708	0	5.68206	5.99145e-259
Cmtm4	156.406	156.721	603.412	576.162	272.898	291.32	391.575	354.898	1.91878	7.5563e-39	0.438846	0.00158229
Cmtm5	0	0	70.3004	82.8059	0	0	43.9851	29.9445	9.34651	9.78122e-10	7.64015	1.13116e-06
Cmtm6	1794.83	1857.93	3011.2	2986.58	1488.15	1557.71	2969.53	3084.29	0.725266	1.31622e-21	1.02559	6.617e-70
Cmtm7	341.091	299.087	1223.23	1219.82	942.351	930.022	1303.46	1282.07	1.92435	2.35779e-56	0.500921	1.42727e-11
Cmtr1	68.7768	63.4064	119.511	151.347	60.7624	79.0869	188.814	148.614	1.04832	0.000206149	1.30406	1.10764e-07
Cnbd2	18.8525	41.8721	45.6953	61.5826	14.9241	20.022	63.2956	66.5434	0.902987	0.0969292	1.92477	6.69319e-06
Cndp2	4065.51	4127.4	12361.2	11884.7	2786.54	2694.96	14356.3	14588.5	1.57352	4.59358e-128	2.43603	0
Cnih2	3.14209	9.57077	3.51502	5.21886	37.3103	39.0429	12.8737	9.98151	-0.406545	0.747302	-1.70352	0.00213442
Cnih4	302.688	309.854	857.665	886.163	385.895	380.418	969.818	948.244	1.52205	2.60847e-37	1.35903	9.5142e-44
Cnksr3	60.0487	62.21	182.781	153.782	55.4324	47.0517	161.994	159.704	1.46257	1.57739e-08	1.6875	3.81687e-11
Cnn2	4677.17	4406.14	1519.66	1542.35	3873.87	3987.38	1848.45	1880.96	-1.56122	1.57347e-86	-1.04091	5.5132e-85
Cnn3	776.444	794.374	4542.58	4631.57	610.822	639.703	4901.66	4776.71	2.55711	3.54238e-239	2.98678	0
Cnnm2	82.3925	74.1735	112.481	145.78	92.7427	92.1012	170.576	198.521	0.736023	0.00992905	1.03224	1.85957e-06
Cnnm4	136.506	151.936	311.665	326.005	184.419	189.208	403.375	405.915	1.16902	8.87057e-11	1.14988	1.89738e-15
Cnot1	4409.74	4320.01	1684.87	1846.43	4960.13	4946.43	2388.07	2404.44	-1.29374	3.92132e-53	-1.0125	1.55535e-95
Cnot3	1093.79	1079.1	410.086	418.205	1030.83	1042.14	535.331	520.148	-1.382	9.16213e-38	-0.938571	1.78519e-25
Cnot6l	2773.76	3024.36	1336.88	1284.54	2805.73	2706.97	1596.34	1489.46	-1.13683	3.64917e-36	-0.801453	2.67405e-40
Cnpy3	529.616	509.644	951.399	899.732	376.301	400.44	1042.77	1094.64	0.833971	1.4295e-13	1.49458	1.01482e-54
Cnrip1	8.3789	9.57077	46.8669	38.2717	11.7261	16.0176	18.2377	19.963	2.26652	3.09836e-05	0.493489	0.459046
Cnst	599.44	599.37	201.528	211.886	390.159	409.45	230.653	255.083	-1.5213	8.3128e-28	-0.684924	9.74447e-07
Cntd1	11.521	4.78539	8.20171	1.73962	33.0462	34.0374	11.8009	11.0906	-0.877576	0.493311	-1.51577	0.0083702
Cntfr	0	0	308.15	286.342	0	0	170.576	163.031	11.2929	2.66123e-14	9.81305	4.26998e-11
Cntln	138.95	131.598	274.172	252.941	117.261	119.131	243.527	255.083	0.957546	5.31576e-07	1.11149	1.83889e-09
Cntnap1	1.04736	1.19635	11.7167	17.0483	5.33004	7.0077	19.3105	14.4177	3.74597	0.00124902	1.48412	0.0663355
Cntnap5a	0	0	31.6352	29.9215	0	0	20.3833	29.9445	8.02181	6.1407e-07	7.08299	1.14542e-05
Cntrl	2476.31	2511.13	762.759	697.936	2114.96	2219.44	1114.65	1171.16	-1.77108	1.19219e-79	-0.88856	1.2813e-42
Coa5	2546.49	2701.35	3984.86	3947.55	1955.06	2024.22	4696.75	4712.38	0.606461	1.01796e-15	1.27638	7.71949e-139
Cobll1	272.314	318.228	521.395	447.778	234.522	194.213	430.196	454.713	0.727312	1.96742e-05	1.08226	2.45035e-14
Cog5	1372.04	1458.35	563.575	483.615	1181.14	1186.3	634.029	678.743	-1.43589	1.24409e-31	-0.816014	1.0613e-22
Coil	283.486	281.141	101.936	147.868	351.783	350.385	171.649	127.542	-1.13894	2.05759e-06	-1.19379	1.37857e-12
Col11a1	0.349121	1.19635	36.3219	17.0483	0	0	17.1649	24.3993	5.50887	2.2044e-05	6.80707	3.40608e-05
Col11a2	180.844	175.863	23.4335	33.0528	166.297	132.145	51.4947	62.1072	-2.59033	3.47075e-18	-1.3582	2.88925e-07
Col12a1	1.39648	2.39269	44.5236	37.9237	0	0	16.0921	9.98151	4.61826	1.18629e-08	6.13685	0.000425978
Col14a1	0	1.19635	685.429	657.925	0	0	152.339	147.505	11.1466	1.60313e-18	9.65906	9.16119e-11
Col15a1	3.49121	13.1598	96.0772	75.1516	17.0561	11.0121	47.2035	59.8891	3.59159	9.50667e-09	1.97149	4.33537e-05
Col16a1	1.04736	4.78539	424.146	398.373	0	0	257.474	263.956	7.54343	5.83049e-21	10.4571	1.57137e-12
Col18a1	25.8349	7.17808	132.399	137.43	6.39605	9.0099	170.576	160.813	2.90473	6.21312e-09	4.4557	4.95132e-24
Col1a1	0.349121	3.58904	6015.37	6086.24	5.33004	6.0066	1397.87	1373.01	12.0572	6.6943e-28	7.96574	1.12528e-71
Col1a2	0.698241	1.19635	7735.39	7970.25	1.06601	1.0011	1513.73	1522.74	13.2483	1.44071e-55	10.5571	2.0152e-24
Col3a1	0	2.39269	13483.6	13793.8	10.6601	2.0022	2579.03	2833.64	13.8451	8.90118e-14	8.78744	4.73255e-27
Col4a1	0	0	474.528	447.43	2.13202	0	261.765	245.102	11.9267	6.70775e-16	7.97396	3.7663e-14
Col4a2	3.84033	0	292.918	260.595	0	0	131.955	127.542	6.83807	1.53767e-11	9.45057	2.55629e-10
Col4a4	0	1.19635	104.279	93.2437	0	1.0011	63.2956	60.9981	8.36226	2.05637e-10	6.94695	4.82697e-06
Col4a5	0.349121	0	246.051	192.054	0	0	195.251	210.721	9.52766	1.87164e-13	10.0959	1.02151e-11
Col5a1	0	2.39269	633.875	670.45	3.19802	8.0088	152.339	155.268	9.45805	4.25404e-07	4.7966	1.23543e-21
Col5a2	0	0	681.914	758.475	0	0	190.96	153.05	12.5766	1.39079e-17	9.8579	3.54505e-11
Col5a3	0.698241	3.58904	188.639	195.881	3.19802	0	108.354	96.488	7.11404	7.44595e-24	6.08021	1.43268e-11
Col6a1	0	0	322.21	346.88	2.13202	0	89.043	72.0887	11.4699	9.69365e-15	6.31951	8.42829e-09
Col6a2	2.44384	5.98173	316.352	315.915	1.06601	0	78.3149	58.78	6.58016	5.30389e-44	7.08782	2.92064e-06
Col6a3	0	0	482.729	458.912	0	0	135.174	137.523	11.9576	5.56152e-16	9.52198	1.80046e-10
Col7a1	15.7104	25.1233	5.85837	2.43547	13.8581	21.0231	5.36403	7.7634	-2.42341	0.00574125	-1.3794	0.0860492
Col8a1	0.698241	0	30.4635	30.6173	0	0	23.6018	22.1811	5.8727	1.86183e-06	6.94782	1.88293e-05
Col9a1	0	0	65.6137	65.4097	0	0	33.257	37.7079	9.11418	2.94343e-09	7.57952	1.38278e-06
Col9a3	11.521	23.9269	37.4936	36.88	14.9241	12.0132	25.7474	26.6174	1.15731	0.0463194	0.996132	0.0949978
Colec12	0	0	90.2189	75.4995	0	0	8.58246	13.3087	9.4451	5.91213e-10	5.88183	0.0010118
Colq	18.1543	27.516	0	3.13132	26.6502	27.0297	2.14561	0	-3.46401	0.000748554	-4.58889	0.000155659
Commd1	164.087	192.612	564.747	492.661	309.142	270.297	422.686	483.549	1.58752	5.7759e-20	0.680979	3.90972e-07
Commd10	367.275	435.47	827.201	837.453	394.423	413.454	693.033	695.379	1.075	3.6061e-15	0.815872	1.29169e-14
Commd3	1846.15	1896.21	909.219	796.398	1370.89	1372.51	750.965	806.285	-1.13282	6.24873e-26	-0.782255	3.3467e-24
Coprs	46.7822	49.0502	138.257	130.819	46.9043	53.0583	66.514	75.4159	1.50054	4.4076e-08	0.53916	0.106113
Cops7a	783.776	738.146	1543.09	1505.82	517.014	517.568	1164	1164.51	1.00408	5.05257e-25	1.20547	4.7458e-44
Cops9	407.773	460.593	1241.97	1217.73	429.601	450.495	807.824	802.957	1.52164	3.45653e-39	0.906703	1.12405e-19
Copz2	3.49121	1.19635	179.266	208.059	22.3862	34.0374	135.174	114.233	6.0721	1.69754e-30	2.17445	1.74505e-11
Coq10b	255.556	270.374	2127.76	2049.27	204.673	190.209	2183.16	2140.48	3.00579	4.86179e-181	3.48923	4.92522e-288
Coq7	201.093	232.091	442.893	433.513	251.578	260.286	374.41	331.608	1.03897	1.04688e-10	0.499333	0.000537947
Coro1a	12516	12299.6	5143.65	4865.37	12781.4	12640.9	6994.7	6939.37	-1.30339	1.27215e-80	-0.832305	3.44625e-103
Coro1b	1823.81	1822.04	3077.99	3018.24	2020.08	2087.29	4278.35	4127.91	0.748877	1.31365e-23	1.06824	7.91427e-92
Coro2b	7.33153	11.9635	57.412	43.4905	3.19802	7.0077	15.0193	17.7449	2.47319	6.4558e-06	1.70861	0.0457344
Cox14	313.51	336.173	779.163	715.332	259.04	245.269	596.481	602.218	1.21269	4.20488e-20	1.2848	4.41399e-26
Cox4i1	3160.94	3234.92	7139.01	6890.29	4094.54	4225.64	5253.54	5261.37	1.14165	1.1693e-62	0.372697	4.17921e-16
Cox4i2	0	0	55.0687	46.9698	2.13202	4.0044	65.4412	64.3253	8.7461	1.93497e-08	4.42582	4.06418e-10
Cox5a	2659.95	2706.14	5530.3	5605.41	3115.94	3262.58	4337.36	4257.67	1.06256	1.94284e-56	0.465192	7.47317e-21
Cox5b	1185.26	1093.46	3138.91	3648.68	1231.24	1287.41	2449.22	2519.78	1.58141	1.43428e-45	1.01491	1.10724e-61
Cox6a2	0	0	23.4335	15.6566	3.19802	0	35.4026	18.854	7.35142	1.5434e-05	4.15839	8.83993e-05
Cox6b2	242.988	276.356	9.37339	9.04603	102.337	115.126	5.36403	4.43623	-4.81452	3.14569e-45	-4.43523	5.30994e-15
Cox6c	1492.84	1577.98	3170.55	3414.53	1743.99	1717.89	2175.65	2301.29	1.11354	2.94321e-37	0.405969	1.70327e-11
Cox7a2	1231.7	1414.08	2754.6	2814.36	1498.81	1555.71	2218.56	2245.84	1.08891	3.9248e-27	0.582289	4.2933e-22
Cox7b	1660.42	1868.69	3551.34	3594.4	1914.55	1796.97	2949.15	3022.18	1.03128	3.37798e-29	0.721553	1.68956e-36
Cox7c	804.025	571.854	1183.39	1908.02	713.159	688.757	863.61	885.028	1.1748	0.00653007	0.354149	7.13791e-05
Cp	0.698241	2.39269	1074.42	1011.76	1.06601	8.0088	782.076	812.939	9.91274	6.04141e-41	7.45891	3.71312e-51
Cpa3	34.2138	23.9269	0	2.43547	22.3862	14.0154	0	0	-4.13762	1.69895e-05	-6.46625	0.000110004
Cpd	538.693	561.087	2155.88	2085.46	380.565	417.459	1864.54	1919.78	1.95874	4.31174e-98	2.27928	1.44808e-169
Cpe	1.39648	1.19635	3735.3	3732.53	1.06601	2.0022	2127.38	2134.94	11.4395	4.90934e-68	10.4614	2.48216e-35
Cpeb1	5.23681	7.17808	110.137	109.596	0	0	47.2035	41.0351	4.2489	2.25985e-20	7.89468	3.53252e-07
Cpeb2	115.559	101.689	1001.78	1025.33	82.0826	86.0946	1032.04	1093.53	3.20427	1.11269e-111	3.69387	7.66597e-146
Cpeb3	6.63329	9.57077	321.039	276.252	4.26403	12.0132	230.653	236.229	5.32873	8.49762e-49	4.85813	5.94693e-32
Cpeb4	764.225	814.712	2881.15	2833.84	417.875	377.415	3284.93	3041.03	1.86953	2.68678e-103	3.02857	0
Cped1	1.39648	1.19635	37.4936	46.9698	0	0	23.6018	16.6359	4.99443	6.69805e-09	6.76244	4.07184e-05
Cpm	160.595	173.47	16.4034	14.2649	300.614	335.368	27.893	17.7449	-3.46887	4.31854e-26	-3.7617	1.5857e-41
Cpne2	155.708	139.973	896.33	828.407	70.3565	61.0671	1262.69	1212.2	2.53125	4.56288e-68	4.27306	8.214e-172
Cpne4	0	0	220.275	232.065	0	0	99.771	143.068	10.9043	2.31672e-13	9.35365	4.48816e-10
Cpne8	1.04736	2.39269	37.4936	27.486	0	0	3.21842	5.54529	4.49157	8.07558e-07	4.56081	0.0383571
Cpox	922.028	908.027	294.09	249.81	1246.16	1236.36	318.624	296.118	-1.76116	1.63357e-37	-1.97802	7.40391e-91
Cpped1	374.956	424.703	649.107	715.332	218.532	227.25	502.074	515.712	0.793762	1.48788e-08	1.2256	6.20418e-21
Cpq	11.521	22.7306	1095.51	1090.05	53.3004	41.0451	990.201	997.042	6.13034	9.18272e-52	4.43687	4.18146e-138
Cpsf1	1420.57	1315.98	570.605	593.907	1532.92	1579.74	729.509	743.068	-1.2246	1.67888e-30	-1.04498	1.83985e-44
Cpt1c	141.743	154.329	43.3519	33.7486	38.3763	22.0242	27.893	42.1442	-1.96872	2.57092e-11	0.250942	0.617919
Cpxm1	5.93505	0	149.974	150.651	4.26403	5.0055	25.7474	33.2717	5.52471	0.000412967	2.70246	0.000229564
Crabp2	45.7348	35.8904	25.7768	16.3524	5.33004	6.0066	37.5482	24.3993	-1.01499	0.0489473	2.48501	0.000348208
Cracr2a	177.353	191.415	28.1202	25.0505	260.106	272.299	46.1307	48.7985	-2.80675	5.40789e-23	-2.45319	9.04186e-27
Cracr2b	0.349121	3.58904	62.0987	44.1864	4.26403	2.0022	33.257	29.9445	5.37701	1.2243e-08	3.38197	2.79645e-05
Cramp1l	634.352	673.543	263.627	326.353	639.605	643.707	371.191	359.335	-1.12116	1.78248e-12	-0.777583	2.38587e-12
Crat	156.057	172.274	412.429	452.997	202.541	225.247	484.909	497.967	1.42402	1.92313e-17	1.23395	3.71721e-20
Creb3	409.519	395.991	1097.86	1182.25	292.086	272.299	1076.03	1008.13	1.50863	4.09306e-40	1.92098	2.29151e-75
Creb3l1	15.7104	23.9269	103.107	81.0663	33.0462	39.0429	64.3684	53.2347	2.28305	2.85921e-08	0.74048	0.0513853
Creb3l2	237.402	259.607	715.892	712.201	128.987	96.1056	656.558	660.998	1.54198	4.22409e-31	2.58865	2.18286e-68
Creb3l3	0	0	10.5451	13.569	0	0	12.8737	13.3087	6.6838	0.000241346	6.14131	0.000399524
Creb5	13.6157	15.5525	1147.07	1116.49	4.26403	0	1278.79	1261	6.33199	1.45607e-157	9.29921	6.70911e-37
Crebrf	777.492	790.785	1068.57	983.929	454.119	465.511	1174.72	1117.93	0.392844	0.000293623	1.35295	1.08196e-50
Creg1	309.321	354.119	1370.86	1414.66	327.264	335.368	1481.55	1486.14	2.0953	3.30393e-69	2.19784	1.83975e-131
Creg2	1.7456	4.78539	38.6652	38.2717	0	0	30.0386	39.9261	3.83608	4.31486e-07	7.55855	1.55267e-06
Creld1	121.494	116.046	544.828	545.893	120.459	129.142	363.682	400.37	2.1987	7.72763e-45	1.64794	5.4837e-24
Creld2	384.382	342.155	1070.91	1144.67	363.509	379.417	1214.42	1274.31	1.60706	3.33669e-38	1.77853	5.36922e-82
Crem	1695.68	1842.37	4607.02	4598.86	1188.6	1171.29	4640.96	4587.06	1.39218	6.60518e-67	2.00263	7.53229e-287
Crim1	1681.02	1787.34	651.45	589.036	792.044	803.883	645.83	605.545	-1.48142	9.80837e-44	-0.315516	0.000893419
Crip1	1023.27	1081.5	4542.58	4405.07	2308.97	2218.44	2981.33	2882.44	2.09996	2.59853e-152	0.40867	1.83218e-13
Crk	1113.35	1219.08	2986.6	3001.54	862.4	912.002	2937.35	3008.87	1.37466	5.83831e-55	1.77905	1.98523e-174
Crlf2	249.97	262	1169.33	1201.73	229.192	195.214	1305.61	1355.27	2.22775	3.76551e-83	2.68576	1.36592e-141
Crnde	2.09472	1.19635	172.236	183.356	6.39605	16.0176	106.208	104.251	6.57724	3.3666e-26	3.25232	3.2349e-14
Crocc	148.725	157.918	140.601	119.686	332.594	299.329	123.373	115.342	-0.238633	0.318004	-1.36822	7.23886e-15
Crtam	503.083	553.908	71.4721	88.3727	480.77	463.509	234.945	229.575	-2.67764	1.01666e-45	-0.987943	1.21145e-13
Crtap	222.739	199.79	516.708	497.879	182.287	165.181	325.061	371.534	1.25642	1.46376e-16	1.039	4.82347e-11
Crtc1	191.318	205.772	73.8154	76.1954	133.251	132.145	90.1158	94.2699	-1.38664	8.88915e-10	-0.490484	0.0405997
Cryab	1.39648	0	1400.15	1348.21	3.19802	4.0044	816.406	830.684	10.3219	2.74328e-44	7.86731	5.83027e-45
Cryba4	1.39648	0	48.0386	50.449	2.13202	2.0022	49.3491	44.3623	5.58474	1.34243e-09	4.53926	1.35696e-07
Crybg1	3809.6	3770.88	1735.25	1685.34	2690.6	2584.84	2545.77	2597.41	-1.14217	1.27588e-53	-0.00133927	0.98221
Crybg2	35.9594	38.2831	3.51502	2.43547	51.1684	61.0671	4.29123	6.65434	-3.73238	2.09901e-07	-3.32783	5.98546e-08
Crybg3	182.939	239.269	373.764	433.166	171.627	170.187	662.995	648.798	0.968351	1.88445e-06	1.97559	1.76812e-52
Cryl1	81.6942	68.1917	392.511	383.76	120.459	123.135	277.857	270.61	2.34792	4.66923e-33	1.20593	1.38188e-11
Cryzl1	203.188	216.539	562.403	571.639	312.34	278.306	590.044	582.255	1.45138	1.41778e-24	1.02536	1.28683e-17
Csad	55.1611	53.8356	282.373	259.899	84.2146	88.0968	220.998	208.503	2.3128	1.5524e-25	1.35251	7.36093e-11
Cse1l	2455.37	2454.9	1157.61	1148.15	2732.18	2791.07	1395.72	1365.25	-1.08322	9.83234e-42	-0.965209	3.58918e-60
Csf1	39.7998	38.2831	947.884	925.478	6.39605	7.0077	617.937	562.292	4.57931	5.55223e-150	6.49376	1.27166e-53
Csf1r	66.3329	78.9589	5988.42	5911.23	9.59407	4.0044	6691.1	6529.02	6.41773	0	9.9789	2.05816e-134
Csf2ra	62.1435	63.4064	1634.48	1608.45	54.3664	44.0484	2056.57	2031.79	4.70351	1.00147e-240	5.41607	5.66111e-245
Csf2rb	325.38	352.922	6670.34	6751.47	110.865	117.129	6076.38	5917.93	4.32962	0	5.75129	0
Csf2rb2	147.678	161.507	1968.41	2110.51	43.7063	50.055	2233.58	2377.82	3.74989	1.07259e-212	5.65216	4.72727e-259
Csf3r	0.349121	5.98173	888.128	1000.63	2.13202	1.0011	1396.79	1408.5	8.40192	2.76542e-08	9.85782	1.97927e-31
Csgalnact1	46.0839	52.6392	19.9184	13.2211	11.7261	11.0121	6.43684	1.10906	-1.61946	0.000858537	-1.54693	0.143108
Csgalnact2	239.846	256.018	956.086	902.863	222.796	235.258	966.599	927.172	1.92063	4.3736e-52	2.08224	2.74637e-78
Csnk1e	262.19	233.288	590.523	583.469	264.37	233.256	575.025	522.366	1.23834	7.84652e-18	1.17778	6.7844e-20
Csnk1g1	2011.98	2042.16	340.957	313.828	1209.92	1190.31	439.851	404.806	-2.6341	2.23273e-143	-1.47094	1.41031e-57
Cspg4	0.698241	0	12.8884	19.4838	0	0	10.7281	19.963	5.01086	0.000348365	6.3688	0.000191483
Csrnp1	929.01	1000.15	5423.68	5391.08	385.895	410.451	5107.63	5059.52	2.50176	2.14296e-215	3.70852	0
Csrnp2	90.0731	101.689	280.03	313.132	91.6767	74.0814	212.416	228.466	1.66074	3.80834e-16	1.44857	7.1068e-12
Csrp1	1395.44	1447.58	7317.1	7401.39	1729.06	1774.95	6165.42	6304.99	2.38342	1.96573e-253	1.86624	0
Csrp2	45.3857	45.4612	131.227	132.559	77.8186	106.117	89.043	69.8706	1.54651	2.22848e-08	-0.176801	0.557014
Cst3	576.747	668.758	12157.3	11719.8	829.354	783.861	11156.1	11029.6	4.28367	0	3.81758	0
Cst6	4.18945	3.58904	125.369	186.487	5.33004	1.0011	78.3149	83.1793	5.29801	1.57504e-24	4.73516	6.19159e-12
Cst7	1438.73	1382.98	234.335	229.978	1011.64	979.075	357.245	356.007	-2.60042	2.48259e-116	-1.44545	1.05561e-47
Cstb	749.911	845.817	6207.53	6093.54	550.06	502.552	5279.28	5301.29	2.96509	4.18217e-238	3.36585	0
Cstf1	750.609	768.054	370.249	332.268	649.199	641.705	426.977	391.497	-1.11386	6.57528e-18	-0.621663	1.36813e-08
Cstf2	1339.93	1397.33	510.85	488.833	1493.48	1474.62	657.631	644.362	-1.44787	8.26801e-45	-1.15347	4.682e-50
Cstf2t	610.612	641.242	1031.07	982.886	512.75	508.559	997.71	1019.22	0.695446	1.07501e-10	1.01687	3.28867e-29
Ctbp2	24.4384	23.9269	415.944	493.356	12.7921	16.0176	382.992	407.024	4.24095	3.3705e-67	4.80767	5.91536e-54
Ctbs	144.536	144.758	328.069	324.265	147.109	178.196	449.506	443.623	1.18017	7.38879e-12	1.49006	1.1464e-23
Ctc1	964.969	909.223	304.635	304.434	1038.29	1089.2	346.517	349.353	-1.61699	4.22727e-41	-1.57747	2.81462e-57
Ctdsp1	686.72	576.639	1204.48	1366.3	541.532	564.62	1164	1154.53	1.0271	1.2367e-13	1.10238	8.41866e-38
Ctdspl	38.4033	32.3014	240.193	238.676	47.9703	60.066	152.339	176.34	2.73104	8.87561e-28	1.63707	1.24959e-10
Ctgf	0	0	42.1802	44.8822	0	0	23.6018	27.7264	8.52761	5.49447e-08	7.11206	9.76514e-06
Cth	60.0487	58.621	26.9485	24.0068	92.7427	64.0704	21.4561	16.6359	-1.23066	0.00191535	-2.00267	1.27539e-06
Cthrc1	0	0	32.8069	33.4007	0	0	6.43684	4.43623	8.13044	3.68524e-07	4.8747	0.0186834
Ctla2a	887.814	1129.35	106.622	75.4995	1957.19	2029.23	152.339	185.213	-3.50195	2.46114e-60	-3.52881	5.66566e-245
Ctla4	2870.12	3018.38	650.279	651.314	7100.68	7407.14	1191.89	1279.85	-2.16777	3.66603e-137	-2.51867	0
Ctnna1	1437.33	1459.54	3293.57	3234.65	1273.88	1332.46	2930.91	3039.93	1.18069	7.88941e-55	1.23048	2.45457e-95
Ctnnal1	8.72802	14.3562	678.399	708.026	31.9802	33.0363	385.138	425.878	6.09695	2.76167e-100	3.67504	9.58122e-57
Ctnnb1	3900.72	3938.37	11855	11841.3	4593.43	4684.14	9402.08	9390.39	1.60441	9.84819e-153	1.05335	1.55707e-143
Ctnnbip1	64.9364	58.621	155.833	162.133	126.855	115.126	159.848	175.231	1.35932	6.30729e-08	0.505193	0.0165263
Ctnnd1	19.8999	22.7306	708.862	592.515	13.8581	12.0132	363.682	342.699	4.97305	1.58335e-92	4.80925	2.2279e-48
Ctnnd2	1.04736	1.19635	64.442	51.1448	0	0	43.9851	60.9981	5.73	7.69296e-11	8.14388	1.22418e-07
Ctns	201.792	202.183	415.944	401.157	210.004	192.211	341.153	424.769	1.02168	3.17475e-11	0.964308	4.88843e-10
Ctps	1261.72	1317.18	441.721	385.152	933.823	956.05	396.939	391.497	-1.64443	4.15908e-42	-1.22615	1.44396e-35
Ctps2	1182.47	1227.45	355.017	317.655	1288.8	1337.47	409.812	362.662	-1.84442	4.9465e-54	-1.72968	4.41017e-77
Ctsa	1690.79	1522.95	5660.35	5932.45	1281.34	1287.41	6208.33	6139.74	1.85452	1.41833e-96	2.30025	0
Ctsb	2994.76	3020.77	64526.4	64457.5	2197.04	2253.48	66911	67129	4.43095	0	4.94741	0
Ctsc	1365.76	1369.82	27833.1	27646.4	1648.05	1614.77	36318.8	36075.4	4.35024	0	4.50706	0
Ctsd	3006.63	2896.35	11294.9	11021.2	1490.28	1505.65	9212.19	9320.52	1.92463	9.61273e-180	2.66398	0
Ctse	34.2138	31.105	558.888	603.996	52.2344	44.0484	812.115	784.103	4.13884	3.04067e-90	4.08972	5.72685e-113
Ctsf	39.1015	45.4612	24.6051	34.7924	47.9703	33.0363	11.8009	6.65434	-0.454425	0.329937	-2.09294	0.00036488
Ctsh	101.943	102.886	5413.13	5640.2	11.7261	6.0066	6456.15	6654.34	5.76461	0	9.57972	4.52854e-161
Ctsk	6.28417	1.19635	207.386	201.796	6.39605	5.0055	91.1886	73.1978	5.39615	1.82958e-32	3.8901	1.99619e-12
Ctsl	260.444	284.73	6140.74	6115.81	357.113	352.387	4359.89	4384.1	4.51657	0	3.65876	0
Ctso	202.839	202.183	792.051	738.295	173.759	187.206	942.997	901.663	1.9214	9.55248e-46	2.38766	6.20555e-90
Ctss	972.65	1061.16	50737	50573.6	502.09	463.509	56450	56394.4	5.65533	0	6.90524	0
Ctsw	900.731	788.392	151.146	144.736	1188.6	1194.31	234.945	255.083	-2.51724	9.56888e-62	-2.24733	2.11639e-102
Ctsz	1755.73	1677.28	16377.7	16197.3	902.909	937.029	14798.3	14459.9	3.25074	0	4.02576	0
Cttn	83.0907	58.621	1181.05	1281.75	37.3103	56.0616	875.41	872.828	4.06124	5.51061e-116	4.25425	5.44198e-122
Cttnbp2nl	7.68065	11.9635	1626.28	1605.67	3.19802	5.0055	2272.21	2154.9	7.54135	9.51616e-160	9.10134	2.96035e-69
Ctxn1	71.5697	56.2283	22.2618	20.8754	24.5182	24.0264	12.8737	12.1996	-1.58532	0.000136422	-0.917576	0.141431
Cubn	2.09472	3.58904	165.206	180.573	2.13202	2.0022	165.212	138.632	6.14009	8.69969e-28	6.23664	7.21616e-16
Cuedc2	664.377	637.653	1407.18	1378.48	809.1	918.008	1020.24	1050.28	1.10014	2.92602e-29	0.29565	0.000568167
Cul9	276.853	283.534	84.3605	83.1539	289.954	280.308	166.285	109.797	-1.73498	2.53424e-18	-1.00897	1.20993e-07
Cutc	55.5102	70.5844	167.549	209.102	57.5644	72.0792	169.504	216.266	1.62775	3.1264e-09	1.60488	1.89519e-11
Cwc25	336.552	363.689	1027.56	1058.04	459.449	420.462	1139.32	1126.8	1.5933	7.60808e-43	1.40096	2.04812e-52
Cwf19l1	306.179	254.822	125.369	133.603	295.284	249.274	145.902	147.505	-1.11151	7.10824e-08	-0.856005	1.47973e-06
Cx3cl1	2.79297	0	9.37339	19.4838	2.13202	1.0011	10.7281	4.43623	3.06409	0.0135765	2.32267	0.0990666
Cx3cr1	5.93505	5.98173	91.3905	105.421	3.19802	5.0055	67.5868	77.634	4.06282	5.22129e-18	4.17225	3.12871e-11
Cxadr	10.8227	17.9452	0	4.52301	43.7063	53.0583	4.29123	3.32717	-2.38358	0.0505905	-3.63026	2.86551e-07
Cxcl1	0.698241	1.19635	2633.92	2650.49	1.06601	0	352.953	324.954	11.6763	2.69509e-43	9.39366	1.54123e-10
Cxcl10	74.0136	65.7991	30162.4	29125.1	77.8186	48.0528	22403.4	22522.7	8.69756	0	8.51767	1.89439e-161
Cxcl12	0	0	180.438	182.66	0	0	31.1114	42.1442	10.5854	1.32673e-12	7.6248	1.17597e-06
Cxcl13	0	0	48.0386	52.1886	0	0	2.14561	7.7634	8.73174	2.02885e-08	4.73629	0.0282639
Cxcl14	0	0	62.0987	73.0641	1.06601	0	22.5289	26.6174	9.16667	2.42844e-09	5.60522	0.000480707
Cxcl16	45.3857	40.6758	2820.22	2766	15.9901	4.0044	2658.42	2665.06	5.99175	0	8.10034	8.86625e-27
Cxcl2	27.2314	19.1415	2734.69	2754.86	7.46205	2.0022	2101.63	1955.27	6.77792	0	8.80517	1.45664e-72
Cxcl5	0.349121	0	42.1802	36.532	0	3.0033	1.07281	2.21811	7.05783	3.955e-07	0.149722	0.949114
Cxcl9	9.77538	11.9635	19782.5	19474.4	30.9142	11.0121	19794.4	19721.3	10.9048	0	9.92002	7.59484e-53
Cxcr3	165.832	167.489	85.5322	60.8867	352.849	337.371	87.9702	89.8336	-1.21498	1.16651e-05	-1.92153	5.19197e-26
Cxcr4	135.808	106.475	1826.64	1904.54	878.39	960.054	1912.81	1903.14	3.90782	4.4791e-169	1.08783	1.23713e-55
Cxcr5	113.813	107.671	22.2618	17.3962	165.231	180.198	26.8202	14.4177	-2.52687	1.07413e-12	-3.02632	1.93773e-20
Cxcr6	143.139	135.187	400.712	311.044	284.624	302.332	681.232	687.615	1.34585	1.67999e-10	1.25605	2.25548e-28
Cxxc1	696.147	660.383	305.807	317.655	713.159	716.787	433.414	493.53	-1.11276	6.37356e-18	-0.591028	2.20465e-08
Cxxc5	127.429	104.082	48.0386	42.0988	125.789	137.151	34.3298	29.9445	-1.38406	8.06785e-06	-1.99674	6.42281e-11
Cyb561	64.2382	58.621	24.6051	23.3109	86.3466	91.1001	5.36403	15.5268	-1.36595	0.000580626	-3.06011	5.66325e-11
Cyb561a3	320.842	290.712	118.339	117.25	194.013	194.213	136.246	138.632	-1.37621	3.27401e-13	-0.463081	0.0176163
Cyb561d1	177.004	144.758	181.609	228.238	133.251	142.156	293.949	257.301	0.355386	0.144167	1.03618	4.54138e-09
Cyb5d1	132.666	82.5479	31.6352	33.4007	49.0364	52.0572	37.5482	48.7985	-1.73377	7.23277e-06	-0.194129	0.626491
Cyb5r2	0	0	56.2403	74.1078	0	0	50.4219	41.0351	9.11863	3.49051e-09	7.94657	2.84815e-07
Cyb5r3	511.811	478.539	1473.97	1376.04	653.463	678.746	1293.81	1309.8	1.52343	3.63532e-44	1.00137	2.601e-36
Cyb5rl	104.038	110.064	36.3219	38.6196	59.6964	50.055	34.3298	34.3808	-1.49297	1.1566e-06	-0.63931	0.104108
Cyba	2090.88	2039.77	5890	6015.96	1884.7	1918.11	5917.6	6055.45	1.53423	1.46247e-107	1.68955	7.74802e-257
Cybb	181.194	262	12964.6	12735.1	79.9506	44.0484	16416.1	16120.1	5.88151	2.20948e-115	8.0732	1.00509e-91
Cycs	1181.08	580.228	1573.56	2866.89	479.703	481.529	1261.62	1277.63	1.34042	0.0484198	1.43648	1.10314e-62
Cyfip1	521.586	509.644	3668.51	3628.85	424.271	382.42	4261.19	4363.03	2.82711	4.12487e-248	3.45501	0
Cyfip2	4628.29	4444.43	1143.55	1069.17	5182.93	5179.69	2403.09	2344.55	-2.03356	9.42786e-131	-1.09086	3.56714e-110
Cygb	0.698241	0	91.3905	77.2392	1.06601	1.0011	21.4561	21.0721	7.30317	5.05151e-11	4.39913	0.00041333
Cyld	3450.71	3472.99	1436.47	1442.84	2853.7	2840.12	1939.64	1808.87	-1.25722	1.72601e-64	-0.567603	1.26116e-22
Cyp11a1	110.322	111.26	17.5751	16.3524	13.8581	18.0198	2.14561	7.7634	-2.71483	1.7595e-14	-1.65945	0.0638714
Cyp1b1	5.93505	2.39269	31.6352	35.1403	0	0	12.8737	6.65434	2.84718	5.23791e-05	5.72029	0.00178663
Cyp27a1	0	3.58904	161.691	161.089	3.19802	1.0011	146.975	147.505	6.67755	0.00183492	6.1898	1.15628e-15
Cyp2ab1	0.698241	0	15.2318	12.5253	0	0	10.7281	17.7449	4.764	0.000864899	6.26089	0.000274594
Cyp2j6	1.39648	1.19635	1608.71	1717.7	2.13202	0	901.158	934.935	10.2749	2.08695e-54	9.83105	2.77057e-21
Cyp2j9	0	0	125.369	172.57	0	0	74.0237	120.887	10.3108	8.04795e-12	9.03614	2.209e-09
Cyp2r1	16.0595	33.4977	18.7468	21.2234	12.7921	12.0132	34.3298	26.6174	-0.238922	0.721082	1.33374	0.021468
Cyp2s1	26.8823	11.9635	8.20171	2.08754	215.334	248.273	4.29123	5.54529	-2.09833	0.0358486	-5.527	6.67208e-26
Cyp2u1	11.521	13.1598	38.6652	25.0505	19.1881	26.0286	20.3833	31.0536	1.36553	0.0210113	0.216809	0.704519
Cyp39a1	1.7456	2.39269	281.202	277.296	15.9901	17.0187	268.202	248.429	7.20574	8.50446e-34	4.00245	2.43872e-37
Cyp4b1	0	1.19635	78.5021	84.1976	1.06601	0	27.893	25.5083	8.08724	1.05419e-09	5.72599	0.000327752
Cyp4f16	53.7646	66.9954	394.854	420.292	51.1684	48.0528	330.425	367.098	2.80862	7.22459e-42	2.84925	8.92165e-42
Cyp4f17	24.7876	23.9269	9.37339	5.91471	22.3862	28.0308	9.65526	9.98151	-1.74317	0.0102694	-1.32676	0.0416379
Cyp4f18	0	2.39269	1108.4	1138.41	0	0	1297.02	1262.11	10.2431	4.06259e-08	12.7524	3.27341e-18
Cyp4v3	120.796	108.868	1017.01	989.844	138.581	124.136	1145.76	1193.35	3.11258	2.76363e-109	3.19119	4.09435e-148
Cyp51	5123.69	5462.52	2959.65	2818.19	5240.49	5342.87	1494.42	1569.32	-0.86574	3.53328e-28	-1.75366	2.30911e-240
Cyp7b1	0	0	30.4635	44.1864	0	0	17.1649	18.854	8.31829	1.95678e-07	6.60127	7.34423e-05
Cyr61	0	0	780.335	825.624	2.13202	0	372.264	348.244	12.732	5.10422e-18	8.48157	5.58057e-16
Cyren	150.82	141.169	69.1287	70.6286	148.175	140.154	52.5675	69.8706	-1.05762	2.33837e-05	-1.20198	3.63246e-06
Cysltr1	257.651	288.32	492.103	458.216	53.3004	54.0594	502.074	553.42	0.814315	8.94944e-08	3.33193	3.54615e-70
Cystm1	13.2666	7.17808	362.047	330.876	27.7162	20.022	183.45	196.303	4.91604	1.10217e-54	3.03196	2.60871e-24
Cyth1	1538.23	1526.54	1940.29	1910.8	966.869	973.069	2852.59	3067.65	0.336209	4.04096e-05	1.64446	7.60821e-146
Cyth2	407.424	362.493	808.455	813.099	460.515	433.476	808.896	790.758	1.07148	4.06581e-17	0.875261	2.51816e-18
Cyth4	1308.85	1266.93	2256.64	2468.52	1210.98	1143.26	3250.61	3217.37	0.88434	2.79476e-21	1.49379	2.7216e-139
D030028A08Rik	145.932	184.237	28.1202	25.3985	58.6304	57.0627	36.4754	29.9445	-2.62413	4.12706e-17	-0.764162	0.0492073
D130017N08Rik	45.3857	59.8173	5.85837	2.08754	29.8482	27.0297	4.29123	6.65434	-3.97145	1.16831e-08	-2.34528	0.00113599
D130058E05Rik	0.349121	0	31.6352	34.0966	2.13202	0	7.50965	14.4177	6.80983	1.42832e-06	3.42887	0.016782
D16Ertd472e	2680.9	2684.6	833.06	818.318	2513.65	2528.78	1157.56	1139	-1.69379	5.75489e-94	-1.09945	1.54982e-71
D17Wsu92e	1757.12	1731.11	3597.04	3517.86	1810.08	1938.13	3834.21	3899.45	1.03466	4.30188e-44	1.07948	1.21331e-86
D1Ertd622e	122.541	114.849	901.017	914.345	134.317	144.158	930.124	927.172	2.93	3.5849e-98	2.77162	4.84307e-107
D2hgdh	226.928	214.146	120.682	95.6791	224.928	224.246	98.6982	97.597	-1.04822	4.45818e-06	-1.15902	6.92712e-09
D330041H03Rik	114.162	135.187	5.85837	10.0898	105.535	116.128	8.58246	11.0906	-3.82108	2.27601e-19	-3.46184	6.13818e-15
D330045A20Rik	0.349121	0	39.8369	28.8777	1.06601	1.0011	33.257	28.8355	6.85519	1.31774e-06	4.9456	3.03398e-05
D3Ertd254e	214.36	227.306	74.9871	69.5848	197.211	241.265	68.6596	64.3253	-1.61069	3.95801e-13	-1.68679	1.09948e-13
D430020J02Rik	115.559	106.475	51.5536	47.3177	143.911	145.159	49.3491	47.6895	-1.17754	5.49531e-05	-1.53947	9.23903e-09
D5Ertd579e	266.379	283.534	632.704	707.678	312.34	304.334	761.693	754.159	1.30568	2.78329e-20	1.33302	2.69692e-34
D5Ertd605e	19.8999	28.7123	21.0901	24.7026	23.4522	38.0418	10.7281	15.5268	-0.0276684	0.963344	-1.19763	0.0429822
D630024D03Rik	0.349121	0	11.7167	17.3962	0	0	15.0193	16.6359	5.65828	0.00035964	6.41494	0.000148298
D630039A03Rik	157.453	193.808	4.68669	7.65433	293.152	255.28	21.4561	17.7449	-4.67831	3.21706e-29	-3.76866	4.16531e-36
D630045J12Rik	281.74	285.927	135.914	131.167	196.145	203.223	100.844	110.906	-1.08343	2.79551e-09	-0.881058	1.66361e-05
D830025C05Rik	0.698241	3.58904	35.1502	26.4422	1.06601	4.0044	18.2377	16.6359	4.26642	8.88576e-06	2.8002	0.00458666
D830050J10Rik	4.53857	2.39269	36.3219	34.7924	1.06601	1.0011	45.0579	29.9445	3.22024	3.14585e-06	5.21895	7.74241e-06
D8Ertd738e	725.473	764.465	1554.81	1493.64	827.222	837.92	1297.02	1267.65	1.0435	5.94526e-27	0.658244	5.36496e-18
D930048N14Rik	60.747	55.0319	4.68669	0.695848	75.6866	60.066	2.14561	1.10906	-4.92169	2.2636e-09	-5.33911	9.76303e-09
Daam1	83.4398	89.726	669.026	657.925	153.505	150.165	812.115	766.359	2.96017	4.46164e-77	2.41363	1.0305e-78
Daam2	0	0	52.7253	41.055	0	1.0011	20.3833	23.2902	8.62046	3.84463e-08	5.43857	0.000808464
Dab2	9.07714	13.1598	4503.91	4537.28	3.19802	3.0033	2587.61	2590.76	8.82128	6.34355e-266	9.74225	4.63608e-60
Dab2ip	33.8647	33.4977	210.901	224.063	40.5083	29.0319	207.052	195.194	2.69961	4.40139e-26	2.57239	4.5948e-22
Dact1	5.93505	2.39269	133.571	150.651	5.33004	7.0077	13.9465	33.2717	4.86247	1.14116e-24	1.96539	0.00989783
Dact3	126.731	116.046	26.9485	38.2717	39.4423	28.0308	18.2377	14.4177	-1.84345	2.55087e-08	-1.0084	0.0625698
Dag1	489.467	448.63	1809.06	1880.88	741.941	791.87	1852.74	1828.84	1.97521	4.33672e-81	1.29768	3.09893e-74
Dagla	0.349121	3.58904	77.3304	69.2369	1.06601	7.0077	78.3149	77.634	5.92228	1.14177e-11	4.27933	8.2803e-12
Daglb	124.287	128.009	594.038	598.777	92.7427	116.128	654.412	558.965	2.25454	1.50322e-50	2.57087	5.98903e-60
Dalrd3	597.345	556.301	205.043	221.628	531.938	484.532	232.799	227.357	-1.42188	3.71916e-22	-1.10748	6.62811e-17
Dancr	76.8065	87.3333	12.8884	17.3962	51.1684	49.0539	20.3833	25.5083	-2.36752	7.23904e-09	-1.09289	0.012797
Dapk2	39.4506	68.1917	9.37339	10.7856	287.822	366.402	19.3105	25.5083	-2.3584	2.16765e-05	-3.83622	2.09072e-41
Dapl1	77.5048	83.7443	7.03004	2.78339	308.076	319.351	6.43684	8.87246	-4.28732	1.52514e-13	-5.32556	2.29689e-36
Dapp1	385.429	364.886	813.141	763.346	465.845	444.488	973.036	856.192	1.06977	6.78844e-18	1.04285	5.5011e-25
Dars2	329.221	323.014	161.691	205.275	602.294	630.693	202.761	195.194	-0.802558	4.06587e-05	-1.59636	2.88975e-35
Daxx	631.908	559.89	2383.18	2361.01	669.453	711.782	2896.58	2973.38	1.98949	6.05116e-84	2.12166	2.87838e-223
Dazap2	2978.35	2995.65	8938.7	8982.71	3566.86	3602.96	8665.06	8710.54	1.59339	1.06182e-140	1.3121	9.51226e-208
Dbi	959.384	1019.29	2814.36	2649.44	1138.5	1160.27	1625.3	1570.42	1.47617	7.24018e-60	0.5104	5.37857e-14
Dbn1	6.63329	1.19635	157.004	232.761	15.9901	22.0242	109.426	109.797	5.44779	3.81347e-10	2.55824	1.58114e-12
Dbndd2	2.44384	1.19635	14.0601	16.7004	2.13202	4.0044	8.58246	6.65434	2.94539	0.00329906	1.34174	0.263053
Dcaf1	1309.55	1345.89	356.189	412.638	1141.69	1125.24	434.487	460.259	-1.76469	3.29606e-48	-1.30635	3.3087e-46
Dcaf4	400.79	437.863	115.996	122.817	325.132	297.327	108.354	98.7061	-1.79054	4.99168e-25	-1.5516	1.64291e-17
Dcakd	123.938	142.365	353.845	329.484	160.967	145.159	225.289	291.682	1.38101	8.77279e-14	0.790947	1.8639e-05
Dcbld1	2.44384	2.39269	97.2489	99.1584	12.7921	5.0055	83.6789	69.8706	5.34462	1.11722e-18	3.15871	2.01227e-10
Dcbld2	33.5156	34.694	568.262	508.317	51.1684	58.0638	278.93	267.283	3.99208	1.16061e-79	2.35554	1.54119e-27
Dck	1228.56	1252.57	3055.72	2979.97	1925.21	2085.29	4054.14	4022.55	1.29115	9.96975e-61	1.04454	1.9432e-81
Dclk1	12.5683	17.9452	1598.16	1623.07	99.1387	97.1067	1264.84	1290.94	6.86251	3.62625e-191	3.73847	1.2763e-176
Dclk2	41.1962	55.0319	176.923	154.826	87.4126	94.1034	157.703	147.505	1.82863	1.95406e-10	0.784398	0.000590237
Dclre1b	351.215	351.726	154.661	150.651	315.538	303.333	236.018	187.431	-1.19867	8.33772e-13	-0.510826	0.00156101
Dclre1c	206.679	262	367.905	335.051	252.644	298.328	586.825	664.325	0.606046	0.00177337	1.21619	2.58335e-22
Dcn	2.09472	3.58904	3539.63	3448.28	1.06601	0	421.613	495.749	10.4921	8.32958e-101	9.82928	1.93253e-11
Dcp1a	947.164	971.433	431.176	388.979	781.384	779.857	718.781	638.817	-1.22701	1.71835e-24	-0.165908	0.0906272
Dcps	781.332	768.054	452.266	453.693	967.935	901.991	433.414	404.806	-0.767148	2.06161e-11	-1.12159	2.30952e-29
Dcstamp	0.698241	0	67.9571	58.7992	4.26403	5.0055	33.257	23.2902	6.89755	1.24483e-09	2.64293	0.000387071
Dct	2.09472	5.98173	37058.9	35024.8	20.2541	4.0044	20443.4	20505.4	13.5671	9.96724e-206	10.7617	2.85682e-31
Dctd	331.315	334.977	94.9056	65.7577	181.221	183.201	43.9851	42.1442	-2.08938	1.95288e-18	-2.04564	2.59926e-15
Dctpp1	426.625	409.15	200.356	188.923	520.212	508.559	193.105	160.813	-1.1045	1.82367e-12	-1.50292	2.22945e-26
Dcun1d2	376.003	356.511	126.541	140.561	247.314	265.291	156.63	192.976	-1.43723	4.19996e-16	-0.518617	0.00318542
Dcun1d3	567.67	611.333	206.215	200.056	311.274	314.345	236.018	236.229	-1.52867	2.43072e-26	-0.370696	0.0137375
Dcun1d4	76.1083	82.5479	210.901	172.57	131.119	102.112	180.232	174.122	1.27895	2.13329e-07	0.640977	0.00259023
Dcxr	504.479	489.306	213.245	205.971	133.251	150.165	151.266	157.486	-1.24388	1.63885e-17	0.157445	0.46467
Ddah1	0	0	35.1502	28.5298	0	0	16.0921	11.0906	8.06361	5.32805e-07	6.19664	0.000338223
Ddah2	9.07714	15.5525	99.5922	82.8059	69.2905	80.088	39.6939	39.9261	3.00199	2.32963e-11	-0.873631	0.0112039
Ddb1	9976.82	9893.79	3763.42	3734.97	8256.23	8320.14	3864.25	4070.24	-1.3983	1.34636e-111	-1.02802	6.65598e-119
Ddb2	194.111	180.648	66.7854	53.5803	395.489	428.471	62.2228	64.3253	-1.6667	7.03608e-11	-2.66848	4.39127e-44
Ddc	91.4696	120.831	7.03004	2.78339	43.7063	41.0451	3.21842	0	-4.68534	9.86837e-17	-4.66233	1.98831e-06
Ddhd1	267.776	285.927	724.094	665.579	252.644	289.318	698.397	721.996	1.33847	9.66834e-23	1.4235	2.99438e-34
Ddias	1166.76	1134.14	227.305	231.37	761.13	789.868	273.566	278.373	-2.31738	7.99225e-87	-1.45584	2.57325e-38
Ddit3	109.624	118.438	1432.96	1332.2	120.459	128.141	1417.18	1407.39	3.62186	2.85848e-158	3.54021	4.64225e-191
Ddit4	4078.78	4303.26	228.476	235.545	5823.6	5798.37	289.658	301.664	-4.15975	0	-4.26201	0
Ddit4l	46.7822	47.8539	0	0.695848	8.52806	8.0088	0	0	-6.48534	2.75504e-08	-5.32955	0.00470939
Ddo	0	0	30.4635	41.055	0	0	27.893	27.7264	8.25399	2.43722e-07	7.22842	6.00485e-06
Ddr2	0	1.19635	1292.36	1212.86	2.13202	0	875.41	882.81	12.0463	1.70095e-21	9.76862	5.01711e-21
Ddt	635.05	650.812	271.828	247.374	287.822	282.31	210.27	197.412	-1.31008	1.23858e-21	-0.448215	0.00503771
Ddx11	304.433	290.712	121.854	110.64	344.321	349.384	119.082	120.887	-1.36442	6.62446e-13	-1.49654	7.51855e-19
Ddx17	7223.31	7462.81	2780.38	2849.85	5775.63	5586.14	3155.13	3112.01	-1.37323	1.33025e-91	-0.822992	5.53831e-68
Ddx19a	1017.69	967.844	406.571	419.944	1043.62	1024.12	523.53	485.767	-1.25582	1.68634e-28	-0.998998	1.77886e-27
Ddx20	824.623	868.548	274.172	301.65	665.189	634.697	300.386	346.026	-1.53432	8.03511e-33	-0.97328	7.85225e-17
Ddx21	8262.29	8441.42	3027.6	2868.29	6096.5	6295.92	3411.53	3451.39	-1.49606	1.35379e-99	-0.817612	6.16159e-71
Ddx25	9.77538	10.7671	14.0601	14.2649	22.3862	33.0363	11.8009	7.7634	0.484766	0.51479	-1.46659	0.0226622
Ddx27	2037.12	1999.09	901.017	797.79	1593.68	1409.55	899.012	858.41	-1.249	2.00166e-33	-0.73699	1.07114e-20
Ddx31	442.685	405.561	193.326	134.647	275.03	267.294	187.741	187.431	-1.39292	3.97708e-10	-0.496246	0.00255345
Ddx3y	231.118	244.055	1476.31	1424.75	1192.86	1239.36	1996.49	1894.27	2.6255	6.88701e-119	0.71279	1.17276e-27
Ddx4	6.28417	2.39269	80.8455	95.6791	5.33004	9.0099	101.917	96.488	4.13517	1.20284e-14	3.8164	8.42122e-15
Ddx46	3373.55	3525.63	1724.7	1627.59	2970.96	3101.41	1879.56	1787.8	-1.03496	1.51343e-36	-0.692376	1.85771e-33
Ddx51	467.822	461.79	152.318	177.789	362.443	338.372	216.707	166.359	-1.46777	7.43099e-19	-0.834412	2.10295e-07
Ddx55	483.881	434.274	198.013	176.745	433.865	404.444	189.887	197.412	-1.30353	6.56616e-15	-1.07868	7.91547e-14
Ddx56	1066.21	990.575	512.021	511.448	780.318	757.832	489.2	529.02	-1.00307	3.46573e-19	-0.560249	2.05187e-08
Ddx58	513.556	459.397	3346.3	3297.28	478.637	479.527	3517.73	3561.18	2.76579	1.47486e-178	2.92025	0
Ddx60	40.498	53.8356	1068.57	1093.87	14.9241	15.0165	1107.14	1078	4.60579	2.5285e-147	6.22457	7.39431e-107
Deaf1	276.853	260.804	134.742	109.944	204.673	256.281	126.591	112.015	-1.15416	3.47247e-08	-0.915543	4.47219e-06
Decr1	348.422	379.242	856.493	859.025	490.364	456.501	542.84	561.183	1.25488	2.31617e-25	0.257123	0.0214336
Dedd2	607.819	550.319	193.326	176.05	666.255	724.796	247.818	237.338	-1.65765	1.86644e-26	-1.48474	9.66539e-35
Def6	1861.16	1737.1	323.382	322.526	1590.48	1651.81	387.283	401.479	-2.47294	6.49154e-118	-2.00471	2.88563e-120
Dennd1a	312.463	337.37	908.047	917.128	309.142	331.364	1348.52	1339.74	1.50777	2.50118e-36	2.10361	1.19189e-111
Dennd1c	705.224	708.237	257.768	299.563	594.832	603.663	501.001	478.004	-1.31911	8.19064e-21	-0.256567	0.0175761
Dennd2a	0.698241	1.19635	271.828	239.372	1.06601	3.0033	195.251	176.34	8.29596	3.82351e-21	6.52768	1.36472e-17
Dennd2c	241.591	263.196	63.2704	44.8822	217.466	218.24	53.6403	58.78	-2.26227	3.43639e-18	-1.92003	8.95426e-17
Dennd2d	1489.35	1604.3	135.914	141.953	1293.07	1314.44	208.125	251.756	-3.45744	3.21785e-166	-2.46982	1.55658e-119
Dennd3	323.635	282.338	73.8154	62.2784	249.446	248.273	65.4412	76.5249	-2.18063	1.48837e-22	-1.77577	4.06006e-17
Dennd5a	3155.7	3242.1	2001.22	1976.9	664.123	752.827	2294.73	2219.22	-0.677054	8.271e-20	1.70547	9.92153e-124
Dennd5b	1.04736	5.98173	380.794	360.101	1.06601	0	289.658	283.919	6.98809	3.60666e-12	9.15232	4.73508e-10
Dennd6a	225.183	193.808	547.172	597.734	340.056	325.357	650.121	619.963	1.44578	9.35226e-20	0.968398	1.38643e-17
Dennd6b	144.536	138.776	36.3219	38.9675	103.403	92.1012	53.6403	49.9076	-1.89497	1.96828e-11	-0.880562	0.00321285
Depdc1a	167.578	100.493	72.6438	93.5916	268.634	252.277	55.786	57.671	-0.687133	0.0551668	-2.16366	7.96035e-23
Depdc1b	113.115	112.457	58.5837	57.0596	410.413	375.412	33.257	32.1627	-0.960104	0.000537951	-3.55049	7.02088e-51
Depdc5	585.475	590.995	233.163	224.063	754.734	714.785	251.037	283.919	-1.36019	3.72801e-23	-1.42321	4.98949e-34
Depdc7	3.84033	5.98173	118.339	142.997	3.19802	2.0022	119.082	153.05	4.89399	2.38564e-23	5.75365	3.89414e-16
Deptor	28.2788	26.3196	1873.51	1902.45	61.8285	81.0891	1384.99	1335.3	6.0952	9.15544e-260	4.28064	4.02471e-187
Des	0.698241	1.19635	30.4635	18.44	0	0	10.7281	19.963	4.85173	1.82272e-05	6.3688	0.000191483
Desi1	1007.21	1065.94	519.051	518.407	1362.36	1338.47	522.457	507.948	-0.987663	6.39959e-20	-1.35476	2.37377e-58
Det1	197.602	198.594	74.9871	86.2852	160.967	160.176	113.718	104.251	-1.2699	2.4284e-08	-0.523431	0.0163457
Dffa	626.322	654.402	189.811	204.579	465.845	492.541	211.343	228.466	-1.67861	1.42892e-32	-1.08947	8.03032e-16
Dffb	196.904	216.539	55.0687	57.4075	191.881	177.195	94.407	66.5434	-1.85707	5.90486e-15	-1.15959	5.66076e-07
Dgat2	26.5332	40.6758	92.5622	105.073	65.0265	81.0891	99.771	108.688	1.628	9.65529e-06	0.545417	0.047202
Dgcr6	131.269	125.616	342.129	349.316	206.806	206.227	201.688	218.484	1.43123	2.30109e-16	0.0594676	0.748299
Dgcr8	1157.33	1144.9	216.76	242.155	876.258	816.897	361.536	378.188	-2.30318	9.3089e-78	-1.15937	1.17893e-28
Dgka	4237.98	4146.54	168.721	169.439	3641.48	3721.09	316.478	329.39	-4.62368	0	-3.47622	0
Dgkd	2146.74	2145.05	841.262	833.974	2522.17	2539.79	1042.77	1034.75	-1.3501	8.15299e-57	-1.2497	6.07778e-89
Dgkg	0.349121	3.58904	15.2318	12.8732	4.26403	7.0077	23.6018	18.854	3.22584	0.0108218	1.94317	0.0115976
Dgkh	177.353	196.201	480.386	451.953	207.872	203.223	775.639	779.667	1.33645	3.13068e-17	1.95507	7.88178e-61
Dgkq	263.935	256.018	97.2489	131.863	228.126	228.251	203.833	195.194	-1.14716	6.01517e-07	-0.158377	0.367851
Dglucy	896.542	852.995	254.253	262.683	440.261	491.54	366.9	328.281	-1.74939	1.12058e-44	-0.387695	0.00245227
Dhcr24	4203.76	4048.44	796.738	831.191	2836.65	3027.33	531.039	514.603	-2.3305	8.11244e-177	-2.45241	2.09154e-248
Dhcr7	935.294	833.853	605.755	664.187	1233.37	1309.44	423.759	428.096	-0.470207	0.000241593	-1.54304	3.28247e-65
Dhodh	393.808	382.831	153.489	108.552	366.707	378.416	139.465	126.433	-1.59279	5.54695e-13	-1.451	4.13972e-19
Dhrs13	171.069	162.703	133.571	107.509	191.881	162.178	81.5333	79.8521	-0.48553	0.044038	-1.09715	1.57542e-06
Dhrs2	0	0	119.511	132.907	0	1.0011	42.9123	29.9445	10.0652	2.24796e-11	6.17782	7.7777e-05
Dhrs3	3.14209	8.37443	597.553	574.771	62.8945	61.0671	381.919	422.551	7.05558	7.10032e-69	2.73336	2.83819e-46
Dhrs9	0.698241	1.19635	64.442	72.7161	0	0	83.6789	112.015	6.39737	1.9781e-11	9.04242	1.94324e-09
Dhtkd1	1.04736	0	44.5236	30.2694	4.26403	2.0022	15.0193	34.3808	5.58816	2.42627e-07	3.02238	0.000623438
Dhx29	972.65	906.831	359.704	395.242	776.054	801.881	493.491	494.64	-1.30218	1.7638e-25	-0.64038	8.29185e-11
Dhx30	1386.71	1415.28	679.571	663.491	1021.24	974.07	761.693	696.488	-1.05414	3.35605e-28	-0.416511	2.04491e-06
Dhx32	309.321	326.603	97.2489	76.1954	422.139	452.497	144.829	157.486	-1.89759	1.06833e-18	-1.49851	4.33698e-23
Dhx33	1064.12	1070.73	325.725	339.922	602.294	538.592	438.778	440.296	-1.66757	8.2403e-50	-0.340175	0.00285005
Dhx35	601.884	512.036	241.365	210.842	579.908	478.526	236.018	281.701	-1.31205	1.17452e-14	-0.996489	6.8489e-13
Dhx37	965.668	967.844	285.888	287.733	594.832	538.592	321.842	331.608	-1.74417	7.43009e-51	-0.758907	2.47543e-10
Dhx40	402.885	516.822	1163.47	1163.11	760.064	776.853	1376.41	1313.12	1.36257	5.46645e-20	0.842441	8.82289e-28
Dhx57	443.034	418.721	168.721	164.568	475.439	459.505	192.032	191.867	-1.36975	7.24718e-18	-1.24879	3.24132e-19
Dhx58	104.038	113.653	2679.62	2775.04	407.215	348.383	3629.31	3636.6	4.67876	0	3.30301	0
Dhx9	6028.96	6132.47	2516.75	2567.68	4574.24	4485.93	2963.09	2980.04	-1.24857	4.62099e-77	-0.573121	2.40453e-32
Diaph2	447.922	468.968	638.562	641.92	272.898	253.278	855.027	901.663	0.494519	4.3832e-05	1.77509	2.16671e-58
Diaph3	707.318	770.447	355.017	326.353	1035.09	1037.14	306.823	354.898	-1.11254	5.8022e-17	-1.61276	1.13207e-55
Dicer1	1350.4	1403.31	569.433	597.734	1135.3	1172.29	783.149	723.105	-1.22376	6.36224e-34	-0.580068	2.01888e-12
Dido1	1317.93	1336.32	480.386	440.124	1000.98	1009.11	566.442	521.257	-1.52843	3.61274e-45	-0.850413	1.41615e-20
Diexf	461.887	488.109	107.794	106.465	345.387	332.365	139.465	129.76	-2.13952	8.31013e-38	-1.29608	5.94904e-15
Dip2a	125.334	101.689	289.403	273.12	126.855	144.158	251.037	283.919	1.28908	6.64177e-10	1.01435	1.59287e-08
Dip2c	43.9892	49.0502	473.356	425.859	76.7526	77.0847	389.429	405.915	3.30036	3.16457e-57	2.40508	7.76473e-41
Dirc2	122.541	111.26	922.107	919.911	164.165	145.159	792.804	779.667	2.96603	3.46119e-98	2.38281	3.27895e-77
Dis3	1383.91	1405.71	396.026	402.548	958.341	979.075	491.346	511.275	-1.79376	9.21507e-69	-0.915613	6.86534e-23
Disc1	5.23681	14.3562	23.4335	26.7902	21.3202	14.0154	39.6939	52.1257	1.49193	0.0465171	1.41622	0.00329875
Dixdc1	24.0893	27.516	55.0687	49.7532	112.997	120.132	39.6939	38.817	1.04056	0.0121642	-1.53525	3.16995e-07
Dkc1	3491.21	3462.23	972.489	812.403	2352.68	2270.49	883.993	961.553	-1.96339	1.16573e-68	-1.29002	5.96725e-82
Dkk3	0	0	1322.82	1254.96	3.19802	5.0055	1317.41	1292.05	13.4109	6.80882e-20	8.33866	8.28548e-58
Dkkl1	11.8701	9.57077	4.68669	5.91471	60.7624	68.0748	1.07281	3.32717	-0.995262	0.280181	-4.84838	5.16098e-09
Dlc1	17.1069	23.9269	472.184	467.958	66.0925	66.0726	363.682	277.264	4.62711	8.84198e-76	2.31392	2.13444e-28
Dleu2	87.6293	66.9954	185.124	166.308	201.475	220.242	210.27	250.647	1.15613	9.732e-06	0.161789	0.364618
Dleu7	43.6401	23.9269	1.17167	0.347924	29.8482	36.0396	0	0	-5.91884	1.81644e-06	-7.32494	3.56661e-06
Dlg3	140.346	154.329	113.652	86.2852	287.822	302.332	93.3342	92.0517	-0.570119	0.0338203	-1.63563	3.44679e-18
Dlg4	446.525	433.077	127.712	144.389	740.875	722.794	152.339	149.723	-1.66975	3.6768e-23	-2.24126	8.36822e-65
Dlg5	10.8227	14.3562	93.7339	85.9373	2.13202	2.0022	86.8974	93.1608	2.90232	2.17351e-12	5.48092	7.62282e-12
Dlgap5	918.886	924.776	337.442	304.782	1936.94	1912.1	402.303	428.096	-1.52491	6.32094e-35	-2.1779	3.26354e-158
Dmac2	298.847	263.196	115.996	129.428	378.433	341.375	152.339	129.76	-1.18295	3.93879e-09	-1.31461	1.77683e-15
Dmd	1.39648	4.78539	32.8069	15.6566	2.13202	7.0077	35.4026	19.963	3.19234	0.000969913	2.62102	0.00071161
Dmkn	0	0	103.107	147.52	0	0	55.786	58.78	10.0625	3.18193e-11	8.27075	6.57593e-08
Dmpk	13.2666	25.1233	99.5922	121.773	7.46205	19.0209	70.8053	67.6525	2.64829	4.89193e-10	2.40989	1.88892e-07
Dmrta2	4.88769	2.39269	207.386	177.789	7.46205	7.0077	84.7518	113.124	5.51184	2.73682e-32	3.80878	1.67295e-14
Dmxl2	5.93505	5.98173	931.48	901.471	12.7921	8.0088	686.596	719.778	7.27372	1.87425e-102	6.12412	1.931e-71
Dnaaf2	63.1908	66.9954	39.8369	42.4467	92.7427	106.117	38.6211	42.1442	-0.64108	0.0698847	-1.26621	5.65747e-05
Dnaaf3	23.3911	26.3196	98.4206	70.9765	31.9802	25.0275	122.3	128.651	1.77543	6.05257e-06	2.17643	5.38728e-12
Dnaaf5	382.287	336.173	247.223	232.413	926.361	865.951	246.746	267.283	-0.589385	0.000503638	-1.76695	4.68423e-56
Dnah17	11.8701	7.17808	9.37339	4.17509	39.4423	27.0297	10.7281	9.98151	-0.605636	0.549322	-1.64476	0.00598122
Dnah2	92.8661	59.8173	304.635	358.014	79.9506	69.0759	247.818	239.556	2.08481	2.57562e-15	1.74656	4.31878e-17
Dnah7b	0.349121	0	489.76	487.442	1.06601	0	333.643	306.1	10.6927	4.55839e-17	9.31007	2.28596e-10
Dnah8	192.365	190.219	8.20171	6.26263	123.657	153.168	8.58246	7.7634	-4.80525	5.94514e-35	-4.04682	7.78755e-19
Dnaic1	0.349121	0	967.802	956.791	2.13202	1.0011	547.132	557.856	11.6701	3.22659e-20	8.51357	1.69851e-23
Dnaic2	0.698241	0	615.129	584.86	0	0	439.851	414.787	10.1232	1.50775e-22	11.1703	3.41494e-14
Dnaja1	3313.5	2622.39	4030.56	5105.79	1909.22	1835.02	3753.75	3998.15	0.629694	0.0113728	1.0851	1.35437e-84
Dnaja4	246.828	233.288	56.2403	27.1381	221.73	193.212	46.1307	43.2532	-2.59729	4.93314e-13	-2.17842	3.22139e-18
Dnajb11	1564.76	1555.25	3543.14	3495.25	1428.45	1415.55	3853.52	3831.79	1.18079	2.66238e-57	1.46941	3.00716e-157
Dnajb14	93.2152	119.635	666.682	743.862	42.6403	56.0616	668.359	695.379	2.77845	6.0015e-53	3.81837	1.2342e-95
Dnajb2	188.525	215.342	380.794	414.726	165.231	161.177	325.061	338.262	1.00521	2.8636e-09	1.05825	2.2921e-11
Dnajb4	377.749	441.452	976.004	830.843	437.063	407.448	804.605	776.34	1.15464	2.63836e-14	0.940592	3.4489e-20
Dnajb5	446.176	439.059	190.983	187.879	265.436	235.258	240.309	288.355	-1.21982	9.11373e-16	0.113625	0.502462
Dnajb9	271.267	242.858	2079.72	2241.68	143.911	145.159	2312.97	2062.85	3.06436	2.79188e-156	3.95539	4.58897e-281
Dnajc11	1073.9	1100.64	508.506	517.015	845.344	880.968	634.029	546.765	-1.07324	8.67299e-25	-0.512309	1.82804e-07
Dnajc15	1589.55	1690.44	848.292	730.293	2448.62	2448.69	855.027	898.336	-1.05346	2.73027e-19	-1.44705	2.00171e-108
Dnajc17	75.0609	74.1735	202.7	162.133	86.3466	94.1034	158.775	226.248	1.28257	4.64724e-07	1.12633	9.37038e-07
Dnajc19	149.773	165.096	441.721	451.953	220.664	221.243	382.992	368.207	1.52785	2.28215e-21	0.80074	2.11128e-08
Dnajc22	5.93505	3.58904	174.579	146.476	4.26403	5.0055	96.5526	80.9612	4.92658	5.79693e-28	4.29197	2.01621e-13
Dnajc25	91.4696	116.046	380.794	361.493	75.6866	87.0957	286.439	276.155	1.87682	1.11178e-20	1.82264	1.09816e-20
Dnajc27	127.429	107.671	201.528	211.886	107.667	86.0946	228.508	195.194	0.807086	0.000216102	1.16683	3.03768e-08
Dnajc28	11.8701	13.1598	3.51502	8.6981	19.1881	13.0143	5.36403	2.21811	-0.923576	0.317225	-2.04338	0.0286731
Dnajc9	1935.87	1820.84	637.39	701.763	2460.35	2476.72	732.727	753.05	-1.47465	2.90028e-45	-1.69753	8.58106e-141
Dnal1	41.5454	47.8539	126.541	102.986	62.8945	69.0759	108.354	74.3068	1.37416	1.0561e-05	0.50491	0.0961448
Dnal4	94.9608	61.0137	229.648	257.812	97.0067	89.0979	205.979	181.885	1.61387	5.58425e-09	1.096	2.57606e-07
Dnase1l1	158.501	161.507	538.97	522.582	152.439	122.134	547.132	597.782	1.73869	3.12261e-31	2.09766	1.75162e-46
Dnase1l2	17.456	16.7489	2.34335	4.52301	15.9901	13.0143	3.21842	13.3087	-2.198	0.0113126	-0.781545	0.361103
Dnase1l3	0.349121	1.19635	1185.73	1103.62	2.13202	1.0011	2424.54	2409.98	11.0484	6.44309e-27	10.6431	1.51217e-36
Dnase2a	95.3099	88.5296	1049.82	1054.21	162.033	179.197	872.192	895.009	3.50714	1.80749e-135	2.40623	2.03222e-87
Dnhd1	5.23681	5.98173	22.2618	30.2694	3.19802	5.0055	39.6939	32.1627	2.28039	0.00105037	3.15954	1.23858e-05
Dnm1	4.88769	15.5525	72.6438	59.843	106.601	123.135	20.3833	16.6359	2.87108	3.40345e-06	-2.59756	1.39228e-12
Dnmbp	168.276	138.776	64.442	78.6309	105.535	88.0968	89.043	97.597	-1.08438	7.5058e-05	-0.0169647	0.952189
Dnmt1	4037.58	3888.13	719.408	752.212	6229.75	6460.1	1233.73	1181.15	-2.41744	9.81744e-184	-2.35836	0
Dnmt3aos	0	0	11.7167	19.4838	0	0	5.36403	5.54529	7.06506	6.18806e-05	4.87827	0.0183029
Dnmt3b	129.873	128.009	39.8369	40.3592	285.69	270.297	64.3684	86.5065	-1.67628	4.14951e-09	-1.84838	2.71922e-19
Dnmt3l	0.349121	1.19635	9.37339	10.0898	0	0	4.29123	5.54529	4.02834	0.00700379	4.72825	0.0261893
Dntt	1.04736	1.19635	5.85837	2.78339	120.459	108.119	3.21842	0	1.92303	0.240614	-6.09185	1.05292e-11
Dnttip1	298.847	331.388	650.279	616.522	441.327	482.53	595.408	523.475	1.02282	8.55882e-14	0.31131	0.00729151
Doc2g	21.6455	29.9087	7.03004	2.78339	26.6502	28.0308	6.43684	3.32717	-2.53655	0.00145429	-2.44553	0.00112316
Dock1	1.7456	3.58904	673.712	735.86	1.06601	1.0011	542.84	555.638	8.34927	2.28068e-54	9.09014	2.71667e-18
Dock10	3837.88	3801.99	1673.15	1618.54	3143.66	3068.37	2185.31	2326.8	-1.2091	5.37589e-59	-0.426282	2.02137e-14
Dock2	4690.09	4510.23	2107.84	2052.4	4601.96	4521.97	3532.75	3502.4	-1.13937	6.52313e-53	-0.339827	8.81126e-13
Dock3	17.1069	9.57077	172.236	157.61	13.8581	11.0121	144.829	135.305	3.50608	4.212e-22	3.53302	5.01547e-20
Dock4	6.28417	9.57077	435.863	332.268	2.13202	0	546.059	573.383	5.73765	6.87331e-53	9.11704	2.13373e-18
Dock6	42.5927	40.6758	83.1888	90.8082	75.6866	77.0847	85.8246	78.7431	1.07139	0.000887216	0.142713	0.634334
Dock7	25.8349	39.4794	908.047	877.117	33.0462	23.0253	904.376	873.937	4.89985	2.16033e-117	5.02968	1.25945e-115
Dock8	2841.84	2782.7	1208	1216.69	2509.38	2584.84	1788.37	1863.22	-1.2062	1.04152e-52	-0.445587	1.86323e-14
Dock9	617.245	602.959	76.1588	72.3682	587.37	584.642	151.266	130.869	-3.04293	2.78875e-74	-2.01826	1.75464e-45
Dok2	504.479	436.666	1516.15	1564.61	384.829	342.376	1314.19	1237.71	1.70663	5.29146e-48	1.8479	1.3901e-84
Dok3	23.042	20.3379	325.725	344.793	14.9241	18.0198	453.797	520.148	3.92647	2.13998e-54	4.91664	1.89049e-64
Dok4	4.18945	3.58904	67.9571	57.7554	19.1881	20.022	40.7667	43.2532	3.96934	7.11439e-12	1.13394	0.0165951
[truncated: 5,715 more rows]
